# Supplementary material for: Gene-Excessive Sleepiness Interactions Suggest Treatment Targets for Obstructive Sleep Apnea Subtype
Source: medRxiv preprint, doi:10.1101/2024.10.25.24316158, version 1 (2024-10-28)
Supplement: Supplementary Data [file 316158_file05.xlsx]

## Sheet: SData
Supplementary Data. Associated Studies Identified by Open Target Genetics Locus-to-Gene (L2G) Query**
Study ID	Gene Query	Sex	Reported Trait	PMID	Author	Date	Study N Initial	Study N Replication	Study N Cases	Index Variant ID	Index Variant RSID	P-Value	Beta	Beta CI Lower	Beta CI Upper	Odds Ratio	Odds Ratio CI Lower	Odds Ratio CI Upper	L2G Pipeline Score	Has sumstats
GCST012490_2	MARCHF1	Combined	Femur bone mineral density x serum urate levels interaction [female]	PMID:34046847	Yao Y	2021-05-27	4575			4_163901836_C_T	rs79743645	2e-08							0.757193	FALSE
GCST005520_2	MARCHF1	Combined	Heart rate response to beta blockers (atenolol add-on therapy) [EA]	PMID:29478026	Shahin MH	2018-02-24	325			4_164148204_G_A	rs6822628	4e-08	5.29	3.4017	7.1783				0.731437	FALSE
GCST006287	MARCHF1	Combined	Adolescent idiopathic scoliosis	PMID:30019117	Liu J	2018-07-17	499		196	4_163810480_A_G	rs41445146	5e-32							0.681761	FALSE
NEALE2_796_raw	MARCHF1	Combined	Distance between home and job workplace		UKB Neale v2	2018-08-01	173061	0		4_164421770_G_A	rs185488220	3e-14	15.2254	11.2973	19.1535				0.623337	TRUE
GCST012489	MARCHF1	Combined	Heel bone mineral density x serum urate levels interaction	PMID:34046847	Yao Y	2021-05-27	237799			4_163789656_A_G	rs139869159	2e-08							0.597511	FALSE
GCST009597	MARCHF1	Combined	Multiple sclerosis	PMID:31604244	International Multiple Sclerosis Genetics Consortium	2019-09-01	41505	74299	14802	4_163572655_G_A	rs72989863	6e-09				0.938086	0.9181	0.958508	0.388671	FALSE
GCST011140	MARCHF1	Combined	Glucagon levels in response to oral glucose tolerance test (decremental area under the curve for 0-30 minutes)	PMID:33407418	Jonsson A	2021-01-06	1899			4_164552273_G_C	rs4691991	2e-08							0.182913	FALSE
NEALE2_23112_raw	MARCHF1	Combined	Leg fat mass (right)		UKB Neale v2	2018-08-01	354807	0		4_163438526_A_T	rs148636479	4.45115e-08	-0.0643325	-0.0873752	-0.0412898				0.0280822	TRUE
GCST010344	MARCHF1	Combined	TPE interval (recovery after exercise)	PMID:32386560	Ramirez J	2020-04-29	51503			4_163057167_G_A	rs150100144	1e-08	-0.101	-0.135544	-0.0664564				0.0212907	FALSE
GCST011494	MARCHF1	Combined	Daytime nap	PMID:33568662	Dashti HS	2021-02-10	452633	541333		4_163295587_T_C	rs4356873	4.5e-08	0.00775689	0.00496967	0.0105441				0.021264	TRUE
GCST005325	MARCHF1	Combined	Subjective well-being (MTAG)	PMID:29292387	Turley P	2018-01-01	388538			4_163317233_G_A	rs4478137	3e-10	0.012	0.00826594	0.0157341				0.0209257	FALSE
GCST005328	MARCHF1	Combined	Subjective well-being	PMID:29292387	Turley P	2018-01-01	388538			4_163317233_G_A	rs4478137	3e-08	0.0131	0.00846654	0.0177335				0.020718	FALSE
GCST006569	MARCHF1	Combined	Self-reported math ability (MTAG) [MTAG]	PMID:30038396	Lee JJ	2018-07-23	670471			4_163327650_T_C	rs28436846	2e-14	-0.0154	-0.0193453	-0.0114547				0.0203519	FALSE
GCST006573	MARCHF1	Combined	Self-reported math ability	PMID:30038396	Lee JJ	2018-07-23	564698			4_163324253_T_C	rs9764	2e-12	-0.0155	-0.0198187	-0.0111813				0.0203519	FALSE
GCST006442_2	MARCHF1	Combined	Educational attainment (years of education) [conditional-joint]	PMID:30038396	Lee JJ	2018-07-23	1131881			4_163309636_C_G	rs4146926	4e-08							0.0199111	FALSE
GCST006571	MARCHF1	Combined	Educational attainment (MTAG) [MTAG]	PMID:30038396	Lee JJ	2018-07-23	1131438			4_163309636_C_G	rs4146926	1e-10							0.0199111	FALSE
GCST006574	MARCHF1	Combined	Highest math class taken	PMID:30038396	Lee JJ	2018-07-23	430445			4_163311464_A_G	rs5012553	2e-10	-0.0163	-0.0213222	-0.0112778				0.0199111	FALSE
GCST006568	MARCHF1	Combined	Highest math class taken (MTAG) [MTAG]	PMID:30038396	Lee JJ	2018-07-23	811539			4_163312177_A_G	rs11729053	3e-16	-0.0152	-0.018845	-0.011555				0.0197455	FALSE
NEALE2_23104_raw	MARCHF1	Combined	Body mass index (bmi)		UKB Neale v2	2018-08-01	354831	0		4_163438526_A_T	rs148636479	1.20669e-08	-0.202473	-0.272109	-0.132837				0.0187817	TRUE
GCST008366	MARCHF1	Combined	Leukocyte telomere length	PMID:31171785	Dorajoo R	2019-06-06	16759	43842		4_163180330_A_G	rs10857352	4e-12	0.045	0.0322859	0.0577141				0.0185624	FALSE
GCST006436	MARCHF1	Combined	Triglyceride levels	PMID:30108155	Hebbar P	2018-08-14	1353	1176		4_163324702_A_G	rs10033119	1e-10	6.446	4.49235	8.39965				0.0179982	FALSE
GCST011427_78	MARCHF1	Combined	Protein quantitative trait loci (liver) [APRT]	PMID:32778093	He B	2020-08-10	287			4_163151363_T_C	rs62335067	3e-08	-0.2057	-0.278456	-0.132944				0.0176872	FALSE
GCST008366_2	MARCHF1	Combined	Leukocyte telomere length [East Asian]	PMID:31171785	Dorajoo R	2019-06-06	16759	43842		4_163180330_A_G	rs10857352	5e-09	0.064	0.0425469	0.0854531				0.0169232	FALSE
GCST009856	MARCHF1	Combined	Leukocyte telomere length	PMID:32109421	Li C	2020-02-20	78592			4_163127047_G_C	rs4691895	2e-21							0.0161064	FALSE
NEALE2_21001_raw	MARCHF1	Combined	Body mass index (bmi)		UKB Neale v2	2018-08-01	359983	0		4_163438526_A_T	rs148636479	3.16652e-08	-0.195717	-0.265059	-0.126375				0.0157697	TRUE
GCST010219	MARCHF1	Combined	Attention deficit hyperactivity disorder (inattention symptoms)	PMID:32595297	Kweon K	2018-04-01	54			4_164874994_A_G	rs7684645	1e-08							0.00557426	FALSE
GCST90032654	CCDC3	Combined	Alcohol consumption x experiences in childhood (felt loved by family member) interaction	PMID:34417442	Cheng S	2021-08-20	41648			10_13052866_C_T	rs11592430	4e-08							0.884978	FALSE
GCST90032654	CCDC3	Combined	Alcohol consumption x experiences in childhood (felt loved by family member) interaction	PMID:34417442	Cheng S	2021-08-20	41648			10_13057762_C_T	rs61853201	3e-08							0.884954	FALSE
GCST90032654	CCDC3	Combined	Alcohol consumption x experiences in childhood (felt loved by family member) interaction	PMID:34417442	Cheng S	2021-08-20	41648			10_13058269_C_A	rs9787488	5e-08							0.884954	FALSE
GCST006998	CCDC3	Combined	Cerebrospinal fluid p-tau levels in mild cognitive impairment	PMID:29274321	Chung J	2017-12-20	581		581	10_13048051_G_A	rs12356199	5e-08	-0.79	-1.07404	-0.505958				0.881913	FALSE
GCST90025949	CCDC3	Combined	Height	PMID:34226706	Barton AR	2021-07-05	458235			10_12898432_G_T	rs116856516	7.6e-20	0.0289349	0.0220295	0.0358403				0.865895	TRUE
NEALE2_50_raw	CCDC3	Combined	Standing height		UKB Neale v2	2018-08-01	360388	0		10_12907653_G_T	rs34321514	9.68684e-38	-0.212759	-0.245231	-0.180287				0.851165	TRUE
GCST009867	CCDC3	Combined	Waist circumference adjusted for body mass index	PMID:31669095	Zhu Z	2019-10-24	457690			10_12905039_G_C	rs12570009	8e-15							0.850406	FALSE
NEALE2_20015_raw	CCDC3	Combined	Sitting height		UKB Neale v2	2018-08-01	360066	0		10_12907653_G_T	rs34321514	2.075e-12	-0.0673224	-0.0860933	-0.0485515				0.850053	TRUE
GCST90018739	CCDC3	Combined	Height	PMID:34594039	Sakaue S	2021-09-30	165056			10_12905648_A_T	rs61852237	6e-27							0.844675	FALSE
NEALE2_1697	CCDC3	Combined	Comparative height size at age 10		UKB Neale v2	2018-08-01	355331	0		10_12901111_G_A	rs35954730	1.03738e-18	-0.0156709	-0.0191488	-0.012193				0.843782	TRUE
GCST90018959	CCDC3	Combined	Height	PMID:34594039	Sakaue S	2021-09-30	525444			10_12902646_C_T	rs35859988	5e-61	-0.0244	-0.0273017	-0.0214983				0.841284	FALSE
GCST008839	CCDC3	Combined	Height	PMID:31562340	Akiyama M	2019-09-27	159095	32692		10_12903180_G_A	rs35741360	3e-32							0.840507	FALSE
GCST90000025	CCDC3	Combined	Appendicular lean mass	PMID:33097823	Pei YF	2020-10-23	450243			10_12901108_G_T	rs35092545	5.999e-12	-0.0144	-0.018516	-0.010284				0.840178	TRUE
GCST012226	CCDC3	Combined	Waist circumference adjusted for body mass index	PMID:34021172	Christakoudi S	2021-05-21	186825			10_12901108_G_T	rs35092545	9e-11	-0.0221799	-0.0288857	-0.0154741				0.827691	FALSE
GCST012227	CCDC3	Combined	Hip circumference adjusted for BMI	PMID:34021172	Christakoudi S	2021-05-21	186825			10_12901108_G_T	rs35092545	6e-09	-0.019802	-0.0264744	-0.0131296				0.825059	FALSE
GCST007841	CCDC3	Combined	Height	PMID:30595370	Kichaev G	2018-12-27	458000			10_12901111_G_A	rs35954730	9e-71							0.820526	FALSE
GCST90025949	CCDC3	Combined	Height	PMID:34226706	Barton AR	2021-07-05	458235			10_12903180_G_A	rs35741360	2.3e-77	-0.0305196	-0.0339344	-0.0271048				0.82047	TRUE
NEALE2_20153_raw	CCDC3	Combined	Forced expiratory volume in 1-second (fev1), predicted		UKB Neale v2	2018-08-01	117241	0		10_12893125_T_C	rs4748008	1.08141e-09	-0.00548341	-0.00724604	-0.00372078				0.711178	TRUE
GCST000817	CCDC3	Combined	Height	PMID:20881960	Lango Allen H	2010-09-29	133653	50074		10_12876764_C_T	rs7909670	3e-09	-0.021	-0.0279391	-0.0140609				0.42231	FALSE
GCST001086	CCDC3	Combined	Paget's disease	PMID:21623375	Albagha OM	2011-05-29	3440	3145	741	10_13113726_T_C	rs1561570	4e-38				0.598802	0.553947	0.64729	0.300107	FALSE
GCST000672	CCDC3	Combined	Paget's disease	PMID:20436471	Albagha OM	2010-05-02	1693	744	692	10_13113726_T_C	rs1561570	6e-13							0.28229	FALSE
GCST90026126	CCDC3	Combined	Ascorbate (vitamin c) levels	PMID:33437055	Panyard DJ	2021-01-12	291			10_13169810_A_G	rs150854087	8.791e-11	-0.3481	-0.453352	-0.242848				0.232005	TRUE
GCST010343	CCDC3	Combined	Neurofibrillary tangles (SNP x SNP interaction)	PMID:32450446	Wang H	2020-04-29	1316			10_12834247_T_C	rs1047721	5e-09							0.225507	FALSE
GCST008839	CCDC3	Combined	Height	PMID:31562340	Akiyama M	2019-09-27	159095	32692		10_12786454_T_G	rs914328	5e-09							0.151086	FALSE
GCST90025949	CCDC3	Combined	Height	PMID:34226706	Barton AR	2021-07-05	458235			10_12778212_G_A	rs3802569	2.9e-12	0.0132117	0.00949538	0.016928				0.141287	TRUE
GCST007070	CCDC3	Combined	White blood cell count	PMID:30595370	Kichaev G	2018-12-27	444000			10_13140649_T_C	rs7098640	5e-09							0.127543	FALSE
GCST006568	CCDC3	Combined	Highest math class taken (MTAG) [MTAG]	PMID:30038396	Lee JJ	2018-07-23	811539			10_12714714_A_C	rs11257952	3e-11	-0.011	-0.0142438	-0.00775622				0.0963027	FALSE
FINNGEN_R6_G6_SLEEPAPNO_INCLAVO	CCDC3	Combined	Sleep apnoea including avohilmo”		FINNGEN_R6	2022-01-24	260405	0	21025	10_12656440_C_T	rs185932673	4.23e-08				1.72616	1.42004	2.09827	0.0833623	TRUE
GCST006571	CCDC3	Combined	Educational attainment (MTAG) [MTAG]	PMID:30038396	Lee JJ	2018-07-23	1131438			10_12669950_C_T	rs7905192	3e-11	0.0088	0.00620498	0.011395				0.0826174	FALSE
FINNGEN_R6_G6_SLEEPAPNO	CCDC3	Combined	Sleep apnoea		FINNGEN_R6	2022-01-24	259404	0	20279	10_12656440_C_T	rs185932673	3.55e-08				1.74938	1.43389	2.13428	0.0818664	TRUE
GCST007080	CCDC3	Combined	Lung function (FEV1/FVC)	PMID:30595370	Kichaev G	2018-12-27	370000			10_12698083_A_C	rs10906209	2e-09							0.0751472	FALSE
GCST90002374	CCDC3	Combined	White blood cell count	PMID:32888493	Chen MH	2020-09-01	562243			10_13140649_T_C	rs7098640	3.15e-09	-0.011862	-0.015784	-0.00794004				0.0716629	TRUE
NEALE2_6159_100	CCDC3	Combined	None of the above | pain type(s) experienced in last month		UKB Neale v2	2018-08-01	360391	0	145514	10_12669950_C_T	rs7905192	2.28342e-09				1.02927	1.01958	1.03905	0.0520871	TRUE
GCST004626	CCDC3	Combined	Myeloid white cell count	PMID:27863252	Astle WJ	2016-11-17	169219			10_13516641_G_A	rs10752308	2.992e-08	-0.0211756	-0.0286648	-0.0136865				0.0401483	TRUE
GCST009524	CCDC3	Combined	Household income (MTAG)	PMID:31844048	Hill WD	2019-12-16	505541			10_12650578_G_A	rs7072694	5e-09	0.0118191	0.00785727	0.0157809				0.0399323	FALSE
GCST005337	CCDC3	Combined	Headache	PMID:29397368	Meng W	2018-01-31	223782		74461	10_12684062_T_A	rs2895526	5e-10							0.0333038	FALSE
GCST011427_573	CCDC3	Combined	Protein quantitative trait loci (liver) [TAGLN]	PMID:32778093	He B	2020-08-10	287			10_13198407_A_G	rs2274111	1e-08	0.1908	0.125543	0.256057				0.0313776	FALSE
NEALE2_2724	CCDC3	Combined	Had menopause		UKB Neale v2	2018-08-01	163184	0	43829	10_13166288_C_T	rs117820739	2.08866e-08				1.05839	1.03759	1.0796	0.0289866	TRUE
NEALE2_6138_100	CCDC3	Combined	None of the above | qualifications		UKB Neale v2	2018-08-01	357549	0	61093	10_12636494_T_A	rs12263300	4.54374e-08				1.0339	1.02162	1.04632	0.0220852	TRUE
GCST010340	CCDC3	Combined	Total PHF-tau (SNP x SNP interaction)	PMID:32450446	Wang H	2020-04-29	1285			10_12549713_C_T	rs7897059	2e-09							0.0187879	FALSE
GCST90025974	CCDC3	Combined	Hemoglobin A1c levels	PMID:34226706	Barton AR	2021-07-05	437749			10_12530497_G_A	rs10906162	6.2e-09	0.012684	0.00851471	0.0168533				0.0156698	TRUE
GCST90002355	CCDC3	Combined	Neutrophil count	PMID:32888493	Chen MH	2020-09-01	627215			10_13494086_A_G	rs11258419	2e-18							0.0143663	FALSE
GCST90002378	CCDC3	Combined	White blood cell count	PMID:32888493	Chen MH	2020-09-01	746667			10_13502285_A_C	rs7075477	3e-14							0.0143399	FALSE
GCST90002374	CCDC3	Combined	White blood cell count	PMID:32888493	Chen MH	2020-09-01	562243			10_13494512_A_T	rs10906393	2.44e-16	0.015277	0.0116275	0.0189265				0.0142946	TRUE
GCST90002351	CCDC3	Combined	Neutrophil count	PMID:32888493	Chen MH	2020-09-01	519288			10_13494512_A_T	rs10906393	9.66e-19	0.01719	0.0133817	0.0209983				0.0142757	TRUE
GCST90002398	CCDC3	Combined	Neutrophil count	PMID:32888494	Vuckovic D	2020-09-01	408112			10_13490447_G_A	rs9329341	7.9e-18	0.0187186	0.0144527	0.0229845				0.0142757	TRUE
GCST90002407	CCDC3	Combined	White blood cell count	PMID:32888494	Vuckovic D	2020-09-01	408112			10_13490447_G_A	rs9329341	1e-15	0.017205	0.0129871	0.0214229				0.0142757	TRUE
GCST90019518	CCDC3	Combined	Sex hormone-binding globulin levels	PMID:33462484	Sinnott-Armstrong N	2021-01-18	322484			10_13304228_T_C	rs11598634	4e-09	-0.015	-0.0199964	-0.0100036				0.014249	FALSE
GCST90002389	CCDC3	Combined	Lymphocyte percentage of white cells	PMID:32888494	Vuckovic D	2020-09-01	408112			10_13492234_C_T	rs7916672	9.4e-11	-0.0142416	-0.018552	-0.00993121				0.0142243	TRUE
GCST90002399	CCDC3	Combined	Neutrophil percentage of white cells	PMID:32888494	Vuckovic D	2020-09-01	408112			10_13492234_C_T	rs7916672	1.1e-09	0.0134416	0.00911745	0.0177658				0.0142243	TRUE
GCST010321	CCDC3	Combined	PR interval	PMID:32439900	Ntalla I	2020-05-21	292566			10_13492234_C_T	rs7916672	4e-08	0.35	0.225065	0.474935				0.0140272	FALSE
GCST011520	CCDC3	Combined	Insulin-like growth factor 1 levels	PMID:33587031	Sinnott-Armstrong N	2021-02-15	317114			10_13499724_T_TAAAAC	rs72785320	3e-09	-0.00399977	-0.00532143	-0.00267811				0.0140272	FALSE
GCST90018968	CCDC3	Combined	Neutrophil count	PMID:34594039	Sakaue S	2021-09-30	432666			10_13502285_A_C	rs7075477	3e-08	0.0121	0.00782024	0.0163798				0.0140001	FALSE
GCST90013405	CCDC3	Combined	Liver enzyme levels (alanine transaminase)	PMID:33972514	Pazoki R	2021-05-10	437267	315572		10_13492234_C_T	rs7916672	4.5e-08	0.00221937	0.00144161	0.00299713				0.0134756	TRUE
GCST004629	CCDC3	Combined	Neutrophil count	PMID:27863252	Astle WJ	2016-11-17	170702			10_13516641_G_A	rs10752308	4.118e-08	-0.0208597	-0.0283127	-0.0134067				0.0134137	TRUE
GCST004620	CCDC3	Combined	Sum basophil neutrophil counts	PMID:27863252	Astle WJ	2016-11-17	170143			10_13516641_G_A	rs10752308	3.386e-08	-0.0210245	-0.0284895	-0.0135596				0.0133729	TRUE
GCST004613	CCDC3	Combined	Sum neutrophil eosinophil counts	PMID:27863252	Astle WJ	2016-11-17	170384			10_13516641_G_A	rs10752308	3.08e-08	-0.0210713	-0.0285304	-0.0136122				0.0131687	TRUE
GCST004614	CCDC3	Combined	Granulocyte count	PMID:27863252	Astle WJ	2016-11-17	169822			10_13516641_G_A	rs10752308	2.599e-08	-0.0212166	-0.0286871	-0.0137461				0.013132	TRUE
GCST90025969	CCDC3	Combined	Hemoglobin levels	PMID:34226706	Barton AR	2021-07-05	445373			10_13452594_T_C	rs2277222	2.1e-11	0.0137455	0.00948032	0.0180107				0.0123893	TRUE
GCST90025975	CCDC3	Combined	Mean reticulocyte volume	PMID:34226706	Barton AR	2021-07-05	436944			10_13500761_T_C	rs10796087	6.6e-10	-0.011068	-0.0149666	-0.00716938				0.0121374	TRUE
GCST90025977	CCDC3	Combined	Neutrophil count	PMID:34226706	Barton AR	2021-07-05	443782			10_13492851_A_G	rs2251555	6e-15	0.0165852	0.0125486	0.0206218				0.0121374	TRUE
GCST90025985	CCDC3	Combined	White blood cell count	PMID:34226706	Barton AR	2021-07-05	444734			10_13492851_A_G	rs2251555	4.2e-11	0.01363	0.00965161	0.0176084				0.0121374	TRUE
GCST90012111	CCDC3	Combined	Sex hormone-binding globulin levels	PMID:32042192	Ruth KS	2020-02-10	370125			10_13328779_G_C	rs3824655	1.4e-11	0.00604627	0.00419793	0.00789461				0.0120123	TRUE
GCST010340	CCDC3	Combined	Total PHF-tau (SNP x SNP interaction)	PMID:32450446	Wang H	2020-04-29	1285			10_12489620_A_G	rs10906157	6e-13							0.0118538	FALSE
GCST90012110	CCDC3	Combined	Sex hormone-binding globulin levels adjusted for BMI	PMID:32042192	Ruth KS	2020-02-10	368929			10_13328779_G_C	rs3824655	7.3e-14	0.00589852	0.00424034	0.0075567				0.0117571	TRUE
GCST012186	CCDC3	Combined	Gastrointestinal event in colchicine-treated recent myocardial infarction (time to event)	PMID:33560138	Dube MP	2021-02-09	767		187	10_13335992_A_G	rs74795203	3e-08				2.51	1.81263	3.47566	0.0114971	FALSE
NEALE2_30260_raw	CCDC3	Combined	Mean reticulocyte volume		UKB Neale v2	2018-08-01	344728	0		10_13516641_G_A	rs10752308	3.99128e-08	0.108968	0.0700747	0.147861				0.0113364	TRUE
GCST90025958	CCDC3	Combined	Sex hormone-binding globulin levels	PMID:34226706	Barton AR	2021-07-05	397043			10_13333906_T_C	rs10752297	8e-21	0.0176861	0.0136785	0.0216937				0.0108541	TRUE
GCST011520	CCDC3	Combined	Insulin-like growth factor 1 levels	PMID:33587031	Sinnott-Armstrong N	2021-02-15	317114			10_12417774_A_G	rs2801482	5e-09	0.0126691	0.00842236	0.0169158				0.0106781	FALSE
GCST90002304	CCDC3	Combined	Hematocrit	PMID:32888493	Chen MH	2020-09-01	562259			10_13498869_A_C	rs11258422	5.58e-12	0.013468	0.00964012	0.0172959				0.010621	TRUE
NEALE2_30020_raw	CCDC3	Combined	Haemoglobin concentration		UKB Neale v2	2018-08-01	350474	0		10_13506764_G_GGA	rs60807357	7.36334e-09	0.0149269	0.00986743	0.0199864				0.0105838	TRUE
GCST010557	CCDC3	Combined	Type 2 diabetes	PMID:32541925	Vujkovic M	2020-06-15	1407282		228499	10_13498869_A_C	rs11258422	3e-09	0.0241	0.0161365	0.0320635				0.0105202	FALSE
GCST90002383	CCDC3	Combined	Hematocrit	PMID:32888494	Vuckovic D	2020-09-01	408112			10_13515945_G_C	rs2399972	5.9e-11	0.0148403	0.0103975	0.0192831				0.0105106	TRUE
GCST90025981	CCDC3	Combined	Diastolic blood pressure	PMID:34226706	Barton AR	2021-07-05	422713			10_13452594_T_C	rs2277222	2.5e-08	0.0124436	0.00804087	0.0168463				0.00967947	TRUE
GCST007070	CCDC3	Combined	White blood cell count	PMID:30595370	Kichaev G	2018-12-27	444000			10_13510975_C_T	rs7072066	1e-08							0.00955941	FALSE
GCST90025940	CCDC3	Combined	Left atrial total emptying fraction	PMID:34338756	Ahlberg G	2021-07-29	35658			10_13432369_A_C	rs113306707	5e-08							0.00949803	FALSE
GCST006630	CCDC3	Combined	Diastolic blood pressure	PMID:30224653	Evangelou E	2018-09-17	757601	249262		10_13481937_C_T	rs10906391	1e-13	0.121	0.0891275	0.152872				0.00932841	FALSE
GCST007949	CCDC3	Combined	Type 2 diabetes and end-stage kidney disease	PMID:31092297	Guan M	2019-05-15	10409		3432	10_13485266_A_G	rs59610451	1e-09				1.45	1.28706	1.63357	0.00928608	FALSE
GCST90018948	CCDC3	Combined	Blood urea nitrogen levels	PMID:34594039	Sakaue S	2021-09-30	492819			10_13453241_T_C	rs7096540	3e-08	-0.0113	-0.0152968	-0.0073032				0.00900536	FALSE
GCST90025989	CCDC3	Combined	Insulin-like growth factor 1 levels	PMID:34226706	Barton AR	2021-07-05	435516			10_13492851_A_G	rs2251555	3.4e-21	-0.0182332	-0.0221999	-0.0142665				0.00888578	TRUE
GCST90002384	CCDC3	Combined	Hemoglobin	PMID:32888494	Vuckovic D	2020-09-01	408112			10_13515945_G_C	rs2399972	1.2e-12	0.0160941	0.0116541	0.0205341				0.008713	TRUE
GCST90002379	CCDC3	Combined	Basophil count	PMID:32888494	Vuckovic D	2020-09-01	408112			10_13448742_G_A	rs10430801	2.1e-08	-0.0135386	-0.0182729	-0.00880432				0.00871252	TRUE
NEALE2_23119_raw	CCDC3	Combined	Arm fat percentage (right)		UKB Neale v2	2018-08-01	354760	0		10_13531636_G_A	rs4750377	3.22482e-08	0.0977576	0.0631024	0.132413				0.00869258	TRUE
GCST90002310	CCDC3	Combined	Hemoglobin concentration	PMID:32888493	Chen MH	2020-09-01	563946			10_13515945_G_C	rs2399972	4.09e-13	0.014181	0.0103512	0.0180108				0.00860504	TRUE
GCST007085	CCDC3	Combined	Smoking status	PMID:30595370	Kichaev G	2018-12-27	458000			10_13495204_G_A	rs12770479	2e-08							0.00841371	FALSE
GCST007327	CCDC3	Combined	Smoking status (ever vs never smokers)	PMID:30643258	Karlsson Linner R	2019-01-14	518633			10_13507462_G_C	rs10160101	1e-08							0.00841371	FALSE
GCST007462	CCDC3	Combined	Age of smoking initiation (MTAG)	PMID:30643251	Liu M	2019-01-14	931815			10_13490648_C_T	rs9329342	3e-10	0.00935501	0.006444	0.012266				0.00841371	FALSE
GCST007468	CCDC3	Combined	Smoking initiation (ever regular vs never regular) (MTAG)	PMID:30643251	Liu M	2019-01-14	1359002			10_13490648_C_T	rs9329342	2e-13	-0.00808417	-0.0102403	-0.00592804				0.00841371	FALSE
GCST007474	CCDC3	Combined	Smoking initiation (ever regular vs never regular)	PMID:30643251	Liu M	2019-01-14	1232091			10_13491053_C_T	rs11258417	3e-08	-0.0145136	-0.0196471	-0.00938017				0.00841371	FALSE
GCST90061435	CCDC3	Combined	Externalizing behaviour (multivariate analysis)	PMID:34446935	Karlsson Linner R	2021-08-26	1492085			10_13490648_C_T	rs9329342	4e-09	-0.007	-0.00933167	-0.00466833				0.00841371	FALSE
GCST90018947	CCDC3	Combined	Body mass index	PMID:34594039	Sakaue S	2021-09-30	523818			10_13505405_C_T	rs61833902	3e-09	0.0145	0.00970871	0.0192913				0.00832714	FALSE
GCST90002292	CCDC3	Combined	Basophil count	PMID:32888493	Chen MH	2020-09-01	474001			10_13456371_A_G	rs10906375	2.29e-08	-0.012492	-0.0168706	-0.00811336				0.00828872	TRUE
GCST004219	CCDC3	Combined	Skin pigmentation	PMID:28300201	Hernandez-Pacheco N	2017-03-16	285	373		10_13564490_A_G	rs6602666	5e-09	4.03	2.67912	5.38088				0.00826148	FALSE
NEALE2_23111_raw	CCDC3	Combined	Leg fat percentage (right)		UKB Neale v2	2018-08-01	354811	0		10_13528312_G_A	rs11258438	1.57262e-08	0.0737218	0.0481636	0.09928				0.00801969	TRUE
GCST010555	CCDC3	Combined	Type 2 diabetes	PMID:32541925	Vujkovic M	2020-06-15	1114458		148726	10_13524204_A_G	rs878017	1e-08	-0.0348	-0.0467022	-0.0228978				0.00800651	FALSE
NEALE2_23099_raw	CCDC3	Combined	Body fat percentage		UKB Neale v2	2018-08-01	354628	0		10_13528312_G_A	rs11258438	2.24799e-08	0.0838134	0.0544361	0.113191				0.00800651	TRUE
NEALE2_23115_raw	CCDC3	Combined	Leg fat percentage (left)		UKB Neale v2	2018-08-01	354791	0		10_13528312_G_A	rs11258438	1.40348e-08	0.0703235	0.0460273	0.0946197				0.00798504	TRUE
GCST002874_10	UBLCP1	Combined	Psoriasis [conditional on rs7709212, rs4921493]	PMID:25903422	Yin X	2015-04-23	13816	21070	5084	5_159322080_G_T	rs2853694	5e-10				0.813008	0.761659	0.867819	0.777991	FALSE
GCST011395	UBLCP1	Combined	Tuberculosis susceptibility in HIV infection	PMID:26942285	Sobota RS	2016-03-01	581		267	5_159263943_T_C	rs4921437	2e-08				2.6738	1.8965	3.76967	0.775049	FALSE
GCST002874_6	UBLCP1	Combined	Psoriasis [EA, conditional on rs7709212, rs4921493]	PMID:25903422	Yin X	2015-04-23	13816	21070	5084	5_159322080_G_T	rs2853694	2e-08				0.8	0.740021	0.86484	0.752099	FALSE
GCST90038681	UBLCP1	Combined	Psoriasis	PMID:33959723	Donertas HM	2021-04-08	484598		5427	5_159383785_T_C	rs12657636	6.2e-25				0.997045	0.99648	0.99761	0.686259	TRUE
GCST005527	UBLCP1	Combined	Psoriasis	PMID:23143594	Tsoi LC	2012-12-01	33394		10588	5_159242905_C_T	rs72815820	4.0889e-11				0.0351	0.0129823	0.0948989	0.598201	TRUE
GCST90018948	UBLCP1	Combined	Blood urea nitrogen levels	PMID:34594039	Sakaue S	2021-09-30	492819			5_159049701_T_C	rs17645325	1e-10	-0.0224	-0.029189	-0.015611				0.569451	FALSE
GCST000322	UBLCP1	Combined	Psoriasis	PMID:19169254	Nair RP	2009-01-25	2759	10089	1359	5_159290781_G_A	rs2082412	2e-28				0.694444	0.650982	0.740809	0.554576	FALSE
NEALE2_20003_1140880086	UBLCP1	Combined	Calcipotriol | treatment/medication code		UKB Neale v2	2018-08-01	361141	0	219	5_159402519_A_T	rs12188300	4.55313e-10				2.76346	2.00749	3.8041	0.545051	TRUE
SAIGE_696_42	UBLCP1	Combined	Psoriatic arthropathy		UKB SAIGE	2018-10-24	398907	0	708	5_159328837_G_A	rs1433048	9.4e-09				0.668312	0.582516	0.766745	0.537325	TRUE
NEALE2_20002_1453	UBLCP1	Combined	Psoriasis | non-cancer illness code, self-reported		UKB Neale v2	2018-08-01	361141	0	4192	5_159383785_T_C	rs12657636	9.15383e-21				0.760878	0.718496	0.80576	0.502951	TRUE
NEALE2_20002_1453	UBLCP1	Combined	Psoriasis | non-cancer illness code, self-reported		UKB Neale v2	2018-08-01	361141	0	4192	5_159339014_G_A	rs62377586	3.97788e-23				0.79233	0.756661	0.829679	0.473508	TRUE
NEALE2_20003_1140864184	UBLCP1	Combined	Dovonex 50micrograms/g cream | treatment/medication code		UKB Neale v2	2018-08-01	361141	0	222	5_159399349_A_G	rs918519	2.17844e-08				0.534046	0.42873	0.665233	0.429568	TRUE
GCST003269	UBLCP1	Combined	Cutaneous psoriasis	PMID:26626624	Stuart PE	2015-11-28	6297	17353	1363	5_159290781_G_A	rs2082412	1e-13				0.740741	0.68444	0.801673	0.386713	FALSE
GCST90038679	UBLCP1	Combined	Dermatologic disease	PMID:33959723	Donertas HM	2021-04-08	484598		20101	5_159322080_G_T	rs2853694	1.1e-13				0.996991	0.996193	0.99779	0.343845	TRUE
GCST000833	UBLCP1	Combined	Psoriasis	PMID:20953190	Strange A	2010-10-17	7353	8638	2178	5_159323761_C_T	rs3213094	5e-11							0.328734	FALSE
GCST90038681	UBLCP1	Combined	Psoriasis	PMID:33959723	Donertas HM	2021-04-08	484598		5427	5_159339014_G_A	rs62377586	4.1e-29				0.997441	0.996994	0.997888	0.288213	TRUE
FINNGEN_R6_PSOR_ARTHR_OTH	UBLCP1	Combined	Other psoriatic arthropathies		FINNGEN_R6	2022-01-24	259963	0	1794	5_159402281_A_G	rs733589	9.01e-13				0.729162	0.668641	0.79516	0.277498	TRUE
FINNGEN_R6_M13_PSORIARTH	UBLCP1	Combined	Psoriatic arthropathies		FINNGEN_R6	2022-01-24	175349	0	1935	5_159402281_A_G	rs733589	1.14e-11				0.749222	0.689291	0.814363	0.277066	TRUE
SAIGE_696_4	UBLCP1	Combined	Psoriasis		UKB SAIGE	2018-10-24	400436	0	2237	5_159402281_A_G	rs733589	1.12e-20				0.71177	0.662628	0.764557	0.276844	TRUE
FINNGEN_R6_M13_PSORIARTH_ICD10	UBLCP1	Combined	Psoriatic arthropathies ICD10”		FINNGEN_R6	2022-01-24	260405	0	1820	5_159402281_A_G	rs733589	4.16e-12				0.738053	0.67731	0.804243	0.276321	TRUE
GCST002874_7	UBLCP1	Combined	Psoriasis [EA, conditional on rs7709212]	PMID:25903422	Yin X	2015-04-23	13816	21070	5084	5_159409099_T_C	rs4921493	3e-11				0.793651	0.741364	0.849626	0.260647	FALSE
GCST002874_11	UBLCP1	Combined	Psoriasis [conditional on rs7709212]	PMID:25903422	Yin X	2015-04-23	13816	21070	5084	5_159409099_T_C	rs4921493	7e-13				0.813008	0.768335	0.860279	0.253089	FALSE
GCST005538	UBLCP1	Combined	Sarcoidosis [EA]	PMID:26051272	Fischer A	2015-09-15	7208	9507	1726	5_159405269_C_A	rs4921492	2e-09				1.2	1.13059	1.27367	0.208969	TRUE
FINNGEN_R6_L12_PSORI_VULG	UBLCP1	Combined	Psoriasis vulgaris		FINNGEN_R6	2022-01-24	255831	0	3508	5_159430181_C_T	rs6556423	2.91e-20				0.784931	0.745555	0.826386	0.207308	TRUE
FINNGEN_R6_PSOR_ENTE_ARTHR	UBLCP1	Combined	Psoriatic and enteropathic arthropathies		FINNGEN_R6	2022-01-24	206033	0	2236	5_159430181_C_T	rs6556423	1.57e-10				0.813329	0.763446	0.866471	0.205461	TRUE
SAIGE_696	UBLCP1	Combined	Psoriasis and related disorders		UKB SAIGE	2018-10-24	400492	0	2293	5_159399302_G_C	rs918520	1.93e-21				0.696282	0.646307	0.750123	0.204263	TRUE
SAIGE_696_41	UBLCP1	Combined	Psoriasis vulgaris		UKB SAIGE	2018-10-24	399883	0	1684	5_159399302_G_C	rs918520	3e-15				0.706099	0.647629	0.769848	0.204263	TRUE
GCST002772	UBLCP1	Combined	Leprosy	PMID:25642632	Liu H	2015-02-02	8060	16270	1548	5_159416227_C_A	rs6863015	2e-21				0.8	0.764023	0.837671	0.191595	FALSE
GCST007071	UBLCP1	Combined	Autoimmune traits	PMID:30595370	Kichaev G	2018-12-27	459000			5_159304540_G_A	rs1549922	2e-08							0.185676	FALSE
GCST005527	UBLCP1	Combined	Psoriasis	PMID:23143594	Tsoi LC	2012-12-01	33394		10588	5_159394909_G_T	rs7722096	9.6e-14				0.7746	0.724234	0.828469	0.18477	TRUE
GCST004131	UBLCP1	Combined	Inflammatory bowel disease	PMID:28067908	de Lange KM	2017-01-09	59957		25042	5_159387525_A_C	rs10045431	4.424e-32				1.17798	1.14632	1.21051	0.184337	TRUE
GCST90000473	UBLCP1	Combined	Interleukin-12 subunit B levels	PMID:32641083	Hillary RF	2020-07-08	982			5_159376078_A_G	rs6897260	3.1926e-22	0.47985	0.38283	0.57687				0.182554	TRUE
GCST001850_5	UBLCP1	Combined	Major depressive disorder [partial response - 2 weeks]	PMID:23377640	GENDEP Investigators	2013-02-01	2256		2256	5_159580770_C_A	rs10065906	5e-08				0.679717	0.59162	0.780934	0.17787	FALSE
FINNGEN_R6_RX_CROHN_2NDLINE	UBLCP1	Combined	Second line medication for Crohns disease		FINNGEN_R6	2022-01-24	260405	0	13438	5_159402519_A_T	rs12188300	1.7e-08				1.17468	1.11077	1.24228	0.175497	TRUE
GCST003043	UBLCP1	Combined	Inflammatory bowel disease [EA]	PMID:26192919	Liu JZ	2015-07-20	34652	61834	12882	5_159400761_C_A	rs56167332	7.16555e-50				1.16866	1.14486	1.19295	0.175497	TRUE
GCST003044	UBLCP1	Combined	Crohn's disease [EA]	PMID:26192919	Liu JZ	2015-07-20	20883	48385	5956	5_159400761_C_A	rs56167332	2.28934e-41				1.18598	1.15691	1.21578	0.175497	TRUE
GCST003045	UBLCP1	Combined	Ulcerative colitis [EA]	PMID:26192919	Liu JZ	2015-07-20	27432	45215	6968	5_159400761_C_A	rs56167332	7.27136e-27				1.15185	1.12249	1.18198	0.175497	TRUE
GCST005537	UBLCP1	Combined	Chronic inflammatory diseases (ankylosing spondylitis, Crohn's disease, psoriasis, primary sclerosing cholangitis, ulcerative colitis) (pleiotropy) [subset analysis]	PMID:26974007	Ellinghaus D	2016-03-14	86475		52262	5_159400761_C_A	rs56167332	3e-43							0.175497	FALSE
NEALE2_20002_1477	UBLCP1	Combined	Psoriatic arthropathy | non-cancer illness code, self-reported		UKB Neale v2	2018-08-01	361141	0	712	5_159402519_A_T	rs12188300	1.838e-12				1.89206	1.58454	2.25926	0.175497	TRUE
FINNGEN_R6_L12_PAPULOSQUAMOUS	UBLCP1	Combined	Papulosquamous disorders		FINNGEN_R6	2022-01-24	260405	0	8082	5_159402519_A_T	rs12188300	1.9e-14				1.32618	1.2337	1.42558	0.174262	TRUE
FINNGEN_R6_L12_PSORIASIS	UBLCP1	Combined	Psoriasis		FINNGEN_R6	2022-01-24	257944	0	5621	5_159402519_A_T	rs12188300	3.96e-20				1.50817	1.38162	1.64632	0.174262	TRUE
GCST000835	UBLCP1	Combined	Psoriatic arthritis	PMID:20953186	Huffmeier U	2010-10-17	1460	5488	572	5_159402519_A_T	rs12188300	7e-17							0.174262	FALSE
GCST004346	UBLCP1	Combined	Psoriasis	PMID:28537254	Tsoi LC	2017-05-24	287323	18478	11988	5_159402519_A_T	rs12188300	3e-84							0.174262	FALSE
GCST005527	UBLCP1	Combined	Psoriasis	PMID:23143594	Tsoi LC	2012-12-01	33394		10588	5_159402519_A_T	rs12188300	2.14e-13				1.4769	1.33084	1.63899	0.174262	TRUE
GCST011991	UBLCP1	Combined	Psoriasis or type 2 diabetes (trans-disease meta-analysis)	PMID:33385400	Patrick MT	2020-12-29	925490		85148	5_159402519_A_T	rs12188300	2e-56							0.174262	FALSE
GCST90018907	UBLCP1	Combined	Psoriasis vulgaris	PMID:34594039	Sakaue S	2021-09-30	655669		5278	5_159402519_A_T	rs12188300	3e-23							0.174262	FALSE
GCST90038679	UBLCP1	Combined	Dermatologic disease	PMID:33959723	Donertas HM	2021-04-08	484598		20101	5_159402519_A_T	rs12188300	6e-18				1.00615	1.00475	1.00756	0.174262	TRUE
GCST90038681	UBLCP1	Combined	Psoriasis	PMID:33959723	Donertas HM	2021-04-08	484598		5427	5_159402519_A_T	rs12188300	2.2e-42				1.00513	1.00439	1.00587	0.174262	TRUE
NEALE2_20002_1453	UBLCP1	Combined	Psoriasis | non-cancer illness code, self-reported		UKB Neale v2	2018-08-01	361141	0	4192	5_159402519_A_T	rs12188300	1.66804e-33				1.57139	1.46014	1.69113	0.174262	TRUE
SAIGE_696_42	UBLCP1	Combined	Psoriatic arthropathy		UKB SAIGE	2018-10-24	398907	0	708	5_159402519_A_T	rs12188300	2.16e-11				1.90599	1.57783	2.30239	0.174262	TRUE
GCST009696_18	UBLCP1	Combined	Blood protein levels [IL-12]	PMID:28915241	Ahsan M	2017-09-15	961			5_159365811_C_G	rs10076557	1e-17							0.173972	FALSE
GCST003097	UBLCP1	Combined	Pediatric autoimmune diseases	PMID:26301688	Li YR	2015-08-24	16753		6035	5_159402286_C_T	rs755374	2e-10							0.173698	FALSE
GCST004131	UBLCP1	Combined	Inflammatory bowel disease	PMID:28067908	de Lange KM	2017-01-09	59957		25042	5_159402286_C_T	rs755374	1.586e-39				1.19327	1.16234	1.22503	0.172778	TRUE
GCST004133	UBLCP1	Combined	Ulcerative colitis	PMID:28067908	de Lange KM	2017-01-09	45975		12366	5_159399784_C_A	rs6871626	5.895e-24				1.18685	1.14795	1.22706	0.172778	TRUE
GCST004132	UBLCP1	Combined	Crohn's disease	PMID:28067908	de Lange KM	2017-01-09	40266		12194	5_159402286_C_T	rs755374	1.38e-29				1.21762	1.1768	1.25986	0.17212	TRUE
GCST008478_19	UBLCP1	Combined	Neurological blood protein biomarker levels [IL12]	PMID:31320639	Hillary RF	2019-07-18	750			5_159391737_A_C	rs6556416	7e-18	0.49166	0.379801	0.603519				0.171863	FALSE
FINNGEN_R6_K11_IBD_STRICT	UBLCP1	Combined	Inflammatory bowel disease strict (require KELA)”		FINNGEN_R6	2022-01-24	254316	0	4611	5_159369317_A_G	rs4921487	2.76e-08				1.15345	1.0968	1.21303	0.170516	TRUE
GCST004133	UBLCP1	Combined	Ulcerative colitis	PMID:28067908	de Lange KM	2017-01-09	45975		12366	5_159347957_C_A	rs983825	2.11e-20				1.17257	1.1337	1.21278	0.170269	TRUE
GCST001149	UBLCP1	Combined	Ankylosing spondylitis	PMID:21743469	Evans DM	2011-07-10	11802	6594	3023	5_159391737_A_C	rs6556416	2e-08							0.166488	FALSE
GCST90016610	UBLCP1	Combined	Crohn's disease vs rheumatoid arthritis (ordinary least squares (OLS))	PMID:33686288	Peyrot WJ	2021-03-08	14831	20080	14831	5_159387525_A_C	rs10045431	1e-08							0.166197	TRUE
GCST010104_29	UBLCP1	Combined	Blood protein levels [IL12B]	PMID:27532455	Sun W	2016-08-17	1340			5_159387525_A_C	rs10045431	1e-10							0.163818	FALSE
GCST000207	UBLCP1	Combined	Crohn's disease	PMID:18587394	Barrett JC	2008-06-29	9541	8151	3230	5_159387525_A_C	rs10045431	4e-13				1.11	1.07914	1.14174	0.162183	FALSE
GCST009570	UBLCP1	Combined	interleukin 12 receptor subunit beta-1 levels	PMID:25147954	Enroth S	2014-08-22	970			5_159387525_A_C	rs10045431	9e-17	-0.47	-0.580757	-0.359243				0.161798	FALSE
GCST006585_900	UBLCP1	Combined	Blood protein levels [IL12B, 13733_5_3]	PMID:30072576	Emilsson V	2018-08-02	3200			5_159347957_C_A	rs983825	3e-87	0.499915	0.450427	0.549402				0.158806	FALSE
NEALE2_6149_1	UBLCP1	Combined	Mouth ulcers | mouth/teeth dental problems		UKB Neale v2	2018-08-01	359841	0	36831	5_159391737_A_C	rs6556416	2.44725e-10				1.05401	1.03698	1.07131	0.15874	TRUE
GCST003045	UBLCP1	Combined	Ulcerative colitis [EA]	PMID:26192919	Liu JZ	2015-07-20	27432	45215	6968	5_159347957_C_A	rs983825	1.20776e-17				1.12317	1.09367	1.15347	0.150994	TRUE
GCST90002369	UBLCP1	Combined	Red cell distribution width	PMID:32888493	Chen MH	2020-09-01	531774			5_159177955_G_A	rs10076782	3.39e-09	0.012774	0.00854236	0.0170056				0.130579	TRUE
GCST90038602	UBLCP1	Combined	Hematological or dermatological disease	PMID:33959723	Donertas HM	2021-04-08	484598		26874	5_159402519_A_T	rs12188300	6.5e-12				1.0056	1.00399	1.00721	0.11744	TRUE
GCST011956	UBLCP1	Combined	Systemic lupus erythematosus	PMID:33272962	Yin X	2020-12-03	208370		13377	5_159459931_A_G	rs2421184	6e-12				0.904159	0.878576	0.930488	0.117171	FALSE
GCST000836	UBLCP1	Combined	Psoriasis	PMID:20953188	Ellinghaus E	2010-10-17	1618	12906	472	5_159332892_A_G	rs2546890	1e-20				0.649351	0.593077	0.710963	0.116035	FALSE
GCST002740_4	UBLCP1	Combined	Inflammatory skin disease [Psoriasis]	PMID:25574825	Baurecht H	2015-01-08	18190		6291	5_159332892_A_G	rs2546890	3e-35							0.116035	FALSE
GCST009597	UBLCP1	Combined	Multiple sclerosis	PMID:31604244	International Multiple Sclerosis Genetics Consortium	2019-09-01	41505	74299	14802	5_159332892_A_G	rs2546890	5e-19				0.919287	0.902429	0.936459	0.116035	FALSE
GCST90061440	UBLCP1	Combined	Primary biliary cholangitis	PMID:34033851	Cordell HJ	2021-05-22	24510		8021	5_159332892_A_G	rs2546890	3e-11	-0.144233	-0.186766	-0.1017				0.116035	FALSE
GCST90061442	UBLCP1	Combined	Primary biliary cholangitis	PMID:34033851	Cordell HJ	2021-05-22	62576		10516	5_159332892_A_G	rs2546890	5e-12	-0.132819	-0.170517	-0.0951212				0.110609	FALSE
GCST000964	UBLCP1	Combined	Ulcerative colitis	PMID:21297633	Anderson CA	2011-02-06	26405	22545	6687	5_159399784_C_A	rs6871626	1.02e-08				0.892857	0.858892	0.928166	0.11018	TRUE
GCST003044	UBLCP1	Combined	Crohn's disease [EA]	PMID:26192919	Liu JZ	2015-07-20	20883	48385	5956	5_159344329_G_A	rs11135059	2.97089e-34				1.16824	1.13943	1.19778	0.105323	TRUE
NEALE2_20003_1140869848	UBLCP1	Combined	Methotrexate | treatment/medication code		UKB Neale v2	2018-08-01	361141	0	1918	5_159396986_A_G	rs113630578	7.844e-09				2.04745	1.60521	2.61154	0.105236	TRUE
GCST000879	UBLCP1	Combined	Crohn's disease	PMID:21102463	Franke A	2010-11-21	21389	30962	6333	5_159360377_G_A	rs6556412	5e-14				1.18	1.13026	1.23193	0.102594	FALSE
GCST004132	UBLCP1	Combined	Crohn's disease	PMID:28067908	de Lange KM	2017-01-09	40266		12194	5_159371067_A_G	rs6898844	8.688e-20				1.16532	1.12758	1.20434	0.0992695	TRUE
GCST011938	UBLCP1	Combined	Takayasu arteritis	PMID:33308445	Ortiz-Fernandez L	2020-12-03	2404		683	5_159370719_C_G	rs12515766	2e-08							0.0985999	FALSE
GCST011939	UBLCP1	Combined	Takayasu arteritis	PMID:33308445	Ortiz-Fernandez L	2020-12-03	6854		1091	5_159377920_G_T	rs4379175	3e-09				1.3624	1.23006	1.50898	0.0985552	FALSE
GCST90002407	UBLCP1	Combined	White blood cell count	PMID:32888494	Vuckovic D	2020-09-01	408112			5_159538767_G_A	rs10476298	2.5e-10	-0.0141698	-0.0185615	-0.00977811				0.0984263	TRUE
GCST003043	UBLCP1	Combined	Inflammatory bowel disease [EA]	PMID:26192919	Liu JZ	2015-07-20	34652	61834	12882	5_159344329_G_A	rs11135059	2.57404e-33				1.1357	1.11239	1.1595	0.0936844	TRUE
SAIGE_696_4	UBLCP1	Combined	Psoriasis		UKB SAIGE	2018-10-24	400436	0	2237	5_159393053_T_C	rs10060969	5.1e-14				0.781922	0.733522	0.833516	0.0935526	TRUE
GCST007043	UBLCP1	Combined	Psoriatic arthritis	PMID:30552173	Aterido A	2018-12-14	2198	2847	744	5_159341357_A_G	rs4921483	9e-10							0.0797492	FALSE
GCST011494	UBLCP1	Combined	Daytime nap	PMID:33568662	Dashti HS	2021-02-10	452633	541333		5_159615645_C_T	rs73817091	3.8e-08	0.0165127	0.0105891	0.0224363				0.0783022	TRUE
GCST90025974	UBLCP1	Combined	Hemoglobin A1c levels	PMID:34226706	Barton AR	2021-07-05	437749			5_158775998_C_T	rs17056207	3.4e-11	0.0213215	0.014823	0.02782				0.0764897	TRUE
GCST90025984	UBLCP1	Combined	Lymphocyte counts	PMID:34226706	Barton AR	2021-07-05	443762			5_158775998_C_T	rs17056207	1.1e-30	-0.0378643	-0.0444225	-0.0313061				0.0764897	TRUE
GCST010343	UBLCP1	Combined	Neurofibrillary tangles (SNP x SNP interaction)	PMID:32450446	Wang H	2020-04-29	1316			5_159152704_A_G	rs6556401	2e-08							0.0716805	FALSE
GCST90002328	UBLCP1	Combined	Mean corpuscular hemoglobin concentration	PMID:32888493	Chen MH	2020-09-01	491553			5_158770461_A_G	rs7709065	1.43e-16	-0.021576	-0.0266916	-0.0164604				0.0714715	TRUE
GCST90002391	UBLCP1	Combined	Mean corpuscular hemoglobin concentration	PMID:32888494	Vuckovic D	2020-09-01	408112			5_158775283_A_C	rs4704959	3.6e-14	-0.0215558	-0.0271341	-0.0159775				0.0714715	TRUE
GCST007841	UBLCP1	Combined	Height	PMID:30595370	Kichaev G	2018-12-27	458000			5_159494887_G_A	rs6880702	3e-10							0.0691109	FALSE
GCST90025968	UBLCP1	Combined	Systolic blood pressure	PMID:34226706	Barton AR	2021-07-05	422713			5_158777417_A_G	rs1368298	3.1e-16	-0.0166312	-0.0206623	-0.0126001				0.0689574	TRUE
GCST90002374	UBLCP1	Combined	White blood cell count	PMID:32888493	Chen MH	2020-09-01	562243			5_159780687_G_A	rs9313822	9.35e-10	0.025101	0.0170689	0.0331331				0.0655801	TRUE
GCST90002346	UBLCP1	Combined	Mean platelet volume	PMID:32888493	Chen MH	2020-09-01	460935			5_159208094_T_C	rs6556405	1.37e-191	0.065207	0.0608793	0.0695347				0.0653744	TRUE
NEALE2_23107_raw	UBLCP1	Combined	Impedance of leg (right)		UKB Neale v2	2018-08-01	354817	0		5_158918915_A_G	rs6869051	1.46098e-08	0.548338	0.358663	0.738013				0.0643374	TRUE
GCST90002374	UBLCP1	Combined	White blood cell count	PMID:32888493	Chen MH	2020-09-01	562243			5_159529186_G_T	rs6863638	7.87e-11	-0.011996	-0.0156083	-0.00838372				0.0599611	TRUE
GCST002874_2	UBLCP1	Combined	Psoriasis [Chinese, conditional on rs1990760]	PMID:25903422	Yin X	2015-04-23	13816	21070	5084	5_159337169_T_C	rs7709212	5e-09				0.8	0.742344	0.862134	0.0586811	FALSE
FINNGEN_R6_L12_PSORI_ARTHRO	UBLCP1	Combined	Arthropathic psoriasis		FINNGEN_R6	2022-01-24	254386	0	2063	5_159337470_T_C	rs4921482	2.31e-10				0.803	0.750335	0.859363	0.0580441	TRUE
GCST90002401	UBLCP1	Combined	Platelet distribution width	PMID:32888494	Vuckovic D	2020-09-01	408112			5_159208094_T_C	rs6556405	1.2e-24	0.0255114	0.0206325	0.0303903				0.0579601	TRUE
GCST010340	UBLCP1	Combined	Total PHF-tau (SNP x SNP interaction)	PMID:32450446	Wang H	2020-04-29	1285			5_159186781_C_A	rs6871659	4e-13							0.0575808	FALSE
GCST002874_3	UBLCP1	Combined	Psoriasis [Chinese]	PMID:25903422	Yin X	2015-04-23	13816	21070	5084	5_159337169_T_C	rs7709212	1e-11				0.714286	0.648325	0.786957	0.0573653	FALSE
GCST004616	UBLCP1	Combined	Platelet distribution width	PMID:27863252	Astle WJ	2016-11-17	164433			5_159225387_G_A	rs2901184	5.973e-19	0.0371716	0.0289786	0.0453646				0.056863	TRUE
GCST90056183	UBLCP1	Combined	Platelet count	PMID:34469753	Kachuri L	2021-08-26	235256	100764		5_159208094_T_C	rs6556405	6e-24							0.0562586	FALSE
GCST90002402	UBLCP1	Combined	Platelet count	PMID:32888494	Vuckovic D	2020-09-01	408112			5_159203038_C_T	rs6893046	6.5e-29	-0.0272449	-0.0320305	-0.0224593				0.0561356	TRUE
NEALE2_2395_4	UBLCP1	Combined	Pattern 4 | hair/balding pattern		UKB Neale v2	2018-08-01	165649	0	30225	5_158818626_A_C	rs7710925	1.775e-12				0.93753	0.92087	0.954491	0.0558123	TRUE
GCST001335	UBLCP1	Combined	Mean platelet volume	PMID:22139419	Gieger C	2011-11-30	18600	18838		5_159177955_G_A	rs10076782	4e-08	0.007	0.0045013	0.0094987				0.0552911	FALSE
GCST90056184	UBLCP1	Combined	Platelet-to-lymphocyte ratio	PMID:34469753	Kachuri L	2021-08-26	234552	100478		5_159166365_T_C	rs7718670	2e-09							0.0550488	FALSE
NEALE2_30080_raw	UBLCP1	Combined	Platelet count		UKB Neale v2	2018-08-01	350474	0		5_159208094_T_C	rs6556405	5.83414e-36	-2.00681	-2.32095	-1.69267				0.0549779	TRUE
GCST90087646	UBLCP1	Combined	Serum levels of protein IL12B	PMID:35078996	Gudjonsson A	2022-01-25	5363			5_159316100_C_T	rs3213120	2e-91	-1.20347	-1.31979	-1.08715				0.0547843	FALSE
NEALE2_30110_raw	UBLCP1	Combined	Platelet distribution width		UKB Neale v2	2018-08-01	350470	0		5_159208094_T_C	rs6556405	6.35698e-28	0.0155168	0.0127406	0.018293				0.0546835	TRUE
GCST90025958	UBLCP1	Combined	Sex hormone-binding globulin levels	PMID:34226706	Barton AR	2021-07-05	397043			5_159147187_C_T	rs7445090	2e-12	0.0135097	0.0092632	0.0177562				0.0542596	TRUE
GCST90002357	UBLCP1	Combined	Platelet count	PMID:32888493	Chen MH	2020-09-01	542827			5_159195524_C_A	rs55801554	9.5e-35	-0.026052	-0.0302013	-0.0219027				0.0513893	TRUE
GCST004603	UBLCP1	Combined	Platelet count	PMID:27863252	Astle WJ	2016-11-17	166066			5_159172350_G_A	rs10075570	3.792e-11	-0.0278159	-0.0360614	-0.0195704				0.0512987	TRUE
GCST004599	UBLCP1	Combined	Mean platelet volume	PMID:27863252	Astle WJ	2016-11-17	164454			5_159195524_C_A	rs55801554	5.946e-58	0.067642	0.0593804	0.0759036				0.0510974	TRUE
GCST90002395	UBLCP1	Combined	Mean platelet volume	PMID:32888494	Vuckovic D	2020-09-01	408112			5_159208094_T_C	rs6556405	1.9e-175	0.0667578	0.0621245	0.0713911				0.0506868	TRUE
GCST003270	UBLCP1	Combined	Psoriatic arthritis	PMID:26626624	Stuart PE	2015-11-28	6880	17062	1946	5_159337470_T_C	rs4921482	1e-24				0.682594	0.634602	0.734215	0.0506186	FALSE
GCST010241	UBLCP1	Combined	Apolipoprotein A1 levels	PMID:32203549	Richardson TG	2020-03-23	393193			5_159195524_C_A	rs55801554	2e-09	0.0137178	0.00923501	0.0182006				0.0502565	FALSE
GCST010242	UBLCP1	Combined	HDL cholesterol levels	PMID:32203549	Richardson TG	2020-03-23	403943			5_159195524_C_A	rs55801554	4e-10	0.0138395	0.00950223	0.0181768				0.0502565	FALSE
GCST90025956	UBLCP1	Combined	HDL cholesterol levels	PMID:34226706	Barton AR	2021-07-05	400754			5_158852407_T_C	rs116640818	1.8e-08	-0.0258124	-0.0350902	-0.0165346				0.0474818	TRUE
GCST90002332	UBLCP1	Combined	Mean corpuscular hemoglobin concentration	PMID:32888493	Chen MH	2020-09-01	642173			5_158764760_A_G	rs11740542	1e-14							0.0466019	FALSE
NEALE2_30270_raw	UBLCP1	Combined	Mean sphered cell volume		UKB Neale v2	2018-08-01	344729	0		5_158906684_T_C	rs6556370	9.74076e-09	0.0757739	0.0498788	0.101669				0.0465622	TRUE
GCST008479	UBLCP1	Combined	Psoriasis	PMID:25854761	Zuo X	2015-04-09	22422	20338	11245	5_159176563_T_C	rs1473247	6e-11							0.0461915	FALSE
GCST002874_8	UBLCP1	Combined	Psoriasis [EA]	PMID:25903422	Yin X	2015-04-23	13816	21070	5084	5_159337169_T_C	rs7709212	3e-20				0.729927	0.682672	0.780453	0.0460401	FALSE
GCST011990	UBLCP1	Combined	Psoriasis or type 2 diabetes (trans-disease meta-analysis)(opposite effect)	PMID:33385400	Patrick MT	2020-12-29	925490		85148	5_159339014_G_A	rs62377586	3e-50				0.847458	0.829213	0.866103	0.0457814	FALSE
GCST003268	UBLCP1	Combined	Psoriasis vulgaris	PMID:26626624	Stuart PE	2015-11-28	8941	21801	4007	5_159337169_T_C	rs7709212	2e-42				0.733138	0.701179	0.766554	0.0456116	FALSE
GCST90025951	UBLCP1	Combined	Platelet count	PMID:34226706	Barton AR	2021-07-05	444866			5_158804982_G_A	rs7719873	2.3e-18	-0.0290855	-0.0356245	-0.0225465				0.0454333	TRUE
GCST90025960	UBLCP1	Combined	Mean platelet volume	PMID:34226706	Barton AR	2021-07-05	445364			5_158804982_G_A	rs7719873	4.4e-27	0.0336274	0.02748	0.0397748				0.0454333	TRUE
GCST90025972	UBLCP1	Combined	Reticulocyte count	PMID:34226706	Barton AR	2021-07-05	437291			5_158804982_G_A	rs7719873	2.4e-08	-0.0185325	-0.0254934	-0.0115716				0.0454333	TRUE
GCST90025982	UBLCP1	Combined	Heel bone mineral density T score	PMID:34226706	Barton AR	2021-07-05	445855			5_158804982_G_A	rs7719873	2.8e-11	-0.0212791	-0.027862	-0.0146962				0.0454333	TRUE
GCST000321	UBLCP1	Combined	Psoriasis	PMID:19169255	Zhang XJ	2009-01-25	2271	13061	1139	5_159323761_C_T	rs3213094	3e-26				1.28	1.22288	1.33978	0.0440018	FALSE
GCST90002361	UBLCP1	Combined	Platelet count	PMID:32888493	Chen MH	2020-09-01	721201			5_159208094_T_C	rs6556405	5e-39							0.0428575	FALSE
GCST90002394	UBLCP1	Combined	Monocyte percentage of white cells	PMID:32888494	Vuckovic D	2020-09-01	408112			5_158825430_C_G	rs17056278	2.2e-16	0.0328137	0.0249829	0.0406445				0.0411494	TRUE
GCST002874	UBLCP1	Combined	Psoriasis	PMID:25903422	Yin X	2015-04-23	13816	21070	5084	5_159337169_T_C	rs7709212	2e-30				0.724638	0.685813	0.76566	0.0401981	FALSE
GCST90025955	UBLCP1	Combined	Apolipoprotein A1 levels	PMID:34226706	Barton AR	2021-07-05	398508			5_159208094_T_C	rs6556405	6.4e-12	0.016028	0.0113815	0.0206745				0.040007	TRUE
GCST90025956	UBLCP1	Combined	HDL cholesterol levels	PMID:34226706	Barton AR	2021-07-05	400754			5_159208094_T_C	rs6556405	5.1e-14	0.0164705	0.0119865	0.0209545				0.0397326	TRUE
NEALE2_4119_raw	UBLCP1	Combined	Ankle spacing width (right)		UKB Neale v2	2018-08-01	114614	0		5_158826435_G_T	rs60172775	5.3892e-11	-0.127013	-0.16496	-0.0890662				0.0396294	TRUE
NEALE2_23108_raw	UBLCP1	Combined	Impedance of leg (left)		UKB Neale v2	2018-08-01	354811	0		5_158978625_AT_A	rs1457565060	9.67628e-09	-0.471675	-0.632835	-0.310515				0.0389486	TRUE
GCST90002349	UBLCP1	Combined	Mean platelet volume	PMID:32888493	Chen MH	2020-09-01	484042			5_159208094_T_C	rs6556405	2e-194							0.0388095	FALSE
GCST90025951	UBLCP1	Combined	Platelet count	PMID:34226706	Barton AR	2021-07-05	444866			5_159208094_T_C	rs6556405	8e-53	-0.0318081	-0.0360011	-0.0276151				0.0378054	TRUE
GCST90025960	UBLCP1	Combined	Mean platelet volume	PMID:34226706	Barton AR	2021-07-05	445364			5_159208094_T_C	rs6556405	6.9e-257	0.0656205	0.0616781	0.0695629				0.0378054	TRUE
NEALE2_30100_raw	UBLCP1	Combined	Mean platelet (thrombocyte) volume		UKB Neale v2	2018-08-01	350470	0		5_159208094_T_C	rs6556405	2.01623e-133	0.0731457	0.0673159	0.0789755				0.0378054	TRUE
GCST90090980	UBLCP1	Combined	Breast cancer	PMID:32139696	Shu X	2020-03-05	277932	33467	147183	5_158817075_C_T	rs1432679	5e-37				0.93	0.919653	0.940464	0.0369972	FALSE
NEALE2_30100_raw	UBLCP1	Combined	Mean platelet (thrombocyte) volume		UKB Neale v2	2018-08-01	350470	0		5_158819642_T_C	rs7720275	2.59693e-26	0.0363282	0.0296196	0.0430368				0.0369972	TRUE
NEALE2_30190_raw	UBLCP1	Combined	Monocyte percentage		UKB Neale v2	2018-08-01	349861	0		5_158888255_CGT_C	rs910535999	1.16537e-09	0.071028	0.0481501	0.0939059				0.0367343	TRUE
FINNGEN_R6_I9_VEINSOTH	UBLCP1	Combined	Other disorders of veins		FINNGEN_R6	2022-01-24	233021	0	7286	5_158799646_A_C	rs1549883	3e-08				0.883	0.844981	0.922729	0.0365733	TRUE
FINNGEN_R6_I9_VARICVE	UBLCP1	Combined	Varicose veins		FINNGEN_R6	2022-01-24	246160	0	20425	5_158803005_G_T	rs11135046	8.07e-21				0.888829	0.86716	0.91104	0.0364199	TRUE
FINNGEN_R6_I9_DISVEINLYMPH	UBLCP1	Combined	Diseases of veins lymphatic vessels and lymph nodes not elsewhere classified”		FINNGEN_R6	2022-01-24	260405	0	34670	5_158803005_G_T	rs11135046	2.68e-16				0.923458	0.90602	0.941232	0.0364051	TRUE
SAIGE_454	UBLCP1	Combined	Varicose veins		UKB SAIGE	2018-10-24	381764	0	12172	5_158803005_G_T	rs11135046	1.51e-18				0.887808	0.864624	0.911613	0.0357012	TRUE
SAIGE_454_1	UBLCP1	Combined	Varicose veins of lower extremity		UKB SAIGE	2018-10-24	381289	0	11697	5_158803005_G_T	rs11135046	4.19e-20				0.881615	0.858256	0.905609	0.0357012	TRUE
GCST90002346	UBLCP1	Combined	Mean platelet volume	PMID:32888493	Chen MH	2020-09-01	460935			5_158819642_T_C	rs7720275	3.16e-29	0.028803	0.0237756	0.0338304				0.0356709	TRUE
GCST90018939	UBLCP1	Combined	Varicose veins	PMID:34594039	Sakaue S	2021-09-30	638428		22511	5_158803005_G_T	rs11135046	3e-26	-0.113	-0.133896	-0.0921044				0.035623	FALSE
GCST006433	UBLCP1	Combined	Heel bone mineral density	PMID:30048462	Kim SK	2018-07-26	394929			5_158836136_G_A	rs6885822	3e-20							0.0353601	FALSE
GCST007066	UBLCP1	Combined	Heel bone mineral density	PMID:30595370	Kichaev G	2018-12-27	446000			5_158836136_G_A	rs6885822	1e-20							0.0353601	FALSE
GCST90018958	UBLCP1	Combined	Hemoglobin A1c levels	PMID:34594039	Sakaue S	2021-09-30	415403			5_158815537_G_A	rs13164506	3e-15	0.0233	0.0175126	0.0290874				0.0353601	FALSE
GCST004632	UBLCP1	Combined	Lymphocyte percentage of white cells	PMID:27863252	Astle WJ	2016-11-17	171748			5_159003692_A_G	rs75494227	4.192e-09	-0.0390569	-0.0520838	-0.02603				0.0353333	TRUE
GCST90002402	UBLCP1	Combined	Platelet count	PMID:32888494	Vuckovic D	2020-09-01	408112			5_158772248_A_G	rs4704958	7.9e-13	-0.0196318	-0.0250039	-0.0142597				0.0353237	TRUE
GCST90018799	UBLCP1	Combined	Breast cancer	PMID:34594039	Sakaue S	2021-09-30	337280		23714	5_158800890_G_A	rs12332693	3e-13	-0.0734	-0.0931225	-0.0536775				0.0353237	FALSE
GCST90002395	UBLCP1	Combined	Mean platelet volume	PMID:32888494	Vuckovic D	2020-09-01	408112			5_158775912_A_G	rs11745795	2.5e-26	0.0282348	0.0230217	0.0334479				0.035033	TRUE
GCST90018970	UBLCP1	Combined	Pulse pressure	PMID:34594039	Sakaue S	2021-09-30	506308			5_158777417_A_G	rs1368298	4e-22	-0.0178	-0.0214074	-0.0141926				0.0347245	FALSE
NEALE2_20003_1140865336	UBLCP1	Combined	Spasmonal 60mg capsule | treatment/medication code		UKB Neale v2	2018-08-01	361141	0	263	5_159009566_G_C	rs73818906	1.91437e-08				5.68883	3.10231	10.4318	0.0340056	TRUE
GCST90002316	UBLCP1	Combined	Lymphocyte counts	PMID:32888493	Chen MH	2020-09-01	524923			5_158834867_C_G	rs78277239	2.81e-33	-0.042921	-0.0499162	-0.0359258				0.0328697	TRUE
GCST007070	UBLCP1	Combined	White blood cell count	PMID:30595370	Kichaev G	2018-12-27	444000			5_159674699_C_A	rs7705455	6e-09							0.032479	FALSE
GCST90002388	UBLCP1	Combined	Lymphocyte counts	PMID:32888494	Vuckovic D	2020-09-01	408112			5_158893060_CA_C	rs7712033	6.6e-32	-0.0470594	-0.0549057	-0.0392131				0.0320797	TRUE
GCST90002340	UBLCP1	Combined	Monocyte count	PMID:32888493	Chen MH	2020-09-01	521594			5_158873790_C_A	rs31196	2.62e-10	-0.011946	-0.0156484	-0.00824356				0.031994	TRUE
SAIGE_174	UBLCP1	Combined	Breast cancer		UKB SAIGE	2018-10-24	401447	0	12898	5_158803005_G_T	rs11135046	1.97e-10				0.919339	0.895859	0.943435	0.0318181	TRUE
GCST009777	UBLCP1	Combined	C-reactive protein levels	PMID:31900758	Han X	2020-01-03	418642			5_158819777_A_C	rs4704780	7e-11	0.0227696	0.0159254	0.0296138				0.0317858	FALSE
GCST010341	UBLCP1	Combined	Diffuse plaques (SNP x SNP interaction)	PMID:32450446	Wang H	2020-04-29	1316			5_158834155_C_T	rs17715065	2e-08							0.0313525	FALSE
NEALE2_4080_raw	UBLCP1	Combined	Systolic blood pressure, automated reading		UKB Neale v2	2018-08-01	340159	0		5_158840966_A_C	rs4594837	3.18e-13	0.315079	0.230328	0.39983				0.031314	TRUE
GCST006979	UBLCP1	Combined	Heel bone mineral density	PMID:30598549	Morris JA	2018-12-31	426824			5_158836136_G_A	rs6885822	2.9e-20	-0.023218	-0.0281494	-0.0182866				0.0312076	TRUE
GCST007269	UBLCP1	Combined	Pulse pressure	PMID:30578418	Giri A	2018-12-21	459777	316301		5_158843217_A_C	rs7707918	1e-16	-0.212	-0.262034	-0.161966				0.0312076	FALSE
GCST007325	UBLCP1	Combined	General risk tolerance (MTAG)	PMID:30643258	Karlsson Linner R	2019-01-14	975353			5_158836472_T_G	rs6876405	5e-12	0.0096	0.00687525	0.0123248				0.0312076	FALSE
GCST90000061	UBLCP1	Combined	Pulse pressure	PMID:33230300	Surendran P	2020-11-23	810865	354096		5_158831453_C_T	rs57392066	8.42e-33	0.018987	0.0158672	0.0221069				0.0312076	TRUE
GCST90000062	UBLCP1	Combined	Systolic blood pressure	PMID:33230300	Surendran P	2020-11-23	810865	354096		5_158831453_C_T	rs57392066	8.742e-18	0.0137026	0.0105758	0.0168294				0.0312076	TRUE
GCST90011804	UBLCP1	Combined	Breast cancer	PMID:32887889	Rashkin SR	2020-09-04	428231		17881	5_158834155_C_T	rs17715065	1e-11				0.927644	0.907796	0.947925	0.0312076	FALSE
GCST90018972	UBLCP1	Combined	Systolic blood pressure	PMID:34594039	Sakaue S	2021-09-30	485664			5_158834155_C_T	rs17715065	2e-17	0.0161	0.0123848	0.0198152				0.0312076	FALSE
GCST90027052	UBLCP1	Combined	Breast cancer	PMID:34290314	Brandes N	2021-07-21	149186		10682	5_158829110_A_G	rs11954193	1e-09							0.0312076	FALSE
NEALE2_3144_raw	UBLCP1	Combined	Heel broadband ultrasound attenuation, direct entry		UKB Neale v2	2018-08-01	206576	0		5_158815537_G_A	rs13164506	5.2864e-11	-0.496105	-0.644264	-0.347946				0.0312076	TRUE
NEALE2_3147_raw	UBLCP1	Combined	Heel quantitative ultrasound index (qui), direct entry		UKB Neale v2	2018-08-01	206589	0		5_158836136_G_A	rs6885822	9.19672e-10	-0.54144	-0.714756	-0.368124				0.0312076	TRUE
NEALE2_3148_raw	UBLCP1	Combined	Heel bone mineral density (bmd)		UKB Neale v2	2018-08-01	206496	0		5_158836136_G_A	rs6885822	1.38149e-09	-0.00337343	-0.00446489	-0.00228197				0.0312076	TRUE
NEALE2_78_raw	UBLCP1	Combined	Heel bone mineral density (bmd) t-score, automated		UKB Neale v2	2018-08-01	206589	0		5_158836136_G_A	rs6885822	9.2265e-10	-0.0305646	-0.0403492	-0.02078				0.0312076	TRUE
GCST001937	UBLCP1	Combined	Breast cancer	PMID:23535729	Michailidou K	2013-04-01	22627	87170	10052	5_158817075_C_T	rs1432679	2e-14				0.934579	0.91852	0.95092	0.0310299	FALSE
GCST004950	UBLCP1	Combined	Breast cancer	PMID:25751625	Michailidou K	2015-04-01	33864	89677	15748	5_158817075_C_T	rs1432679	4e-16				0.934579	0.919475	0.949932	0.0310299	FALSE
GCST005076	UBLCP1	Combined	Breast cancer (estrogen-receptor negative)	PMID:29058716	Milne RL	2017-10-23	72261	49801	14135	5_158817075_C_T	rs1432679	1e-10				0.925926	0.904578	0.947777	0.0310299	FALSE
GCST90019509	UBLCP1	Combined	Glycated hemoglobin levels	PMID:33462484	Sinnott-Armstrong N	2021-01-18	338919			5_158815537_G_A	rs13164506	7e-15	0.0252	0.0188551	0.0315449				0.0310299	FALSE
GCST007039	UBLCP1	Combined	Body mass index	PMID:30595370	Kichaev G	2018-12-27	458000			5_158844672_T_C	rs17056301	4e-09							0.0305446	FALSE
GCST90002400	UBLCP1	Combined	Plateletcrit	PMID:32888494	Vuckovic D	2020-09-01	408112			5_159770540_C_A		5.1e-09	-0.0283975	-0.037923	-0.018872				0.0305434	TRUE
GCST002641	UBLCP1	Combined	Hip circumference (psychosocial stress interaction) [EA]	PMID:25271088	Singh A	2014-10-01	5805	3157		5_158825430_C_G	rs17056278	3e-08							0.03052	FALSE
GCST007267	UBLCP1	Combined	Systolic blood pressure	PMID:30578418	Giri A	2018-12-21	459777	316301		5_158894394_G_GTAAA	rs368910700	2e-14	-0.2629	-0.330252	-0.195548				0.0303619	FALSE
GCST007087	UBLCP1	Combined	Systolic blood pressure	PMID:30595370	Kichaev G	2018-12-27	422000			5_158840966_A_C	rs4594837	3e-17							0.0303481	FALSE
GCST007815	UBLCP1	Combined	Male-pattern baldness	PMID:28272467	Heilmann-Heimbach S	2017-03-08	22518		10846	5_158847483_A_G	rs17643057	3e-25	-0.21	-0.249646	-0.170354				0.0303481	FALSE
GCST90002393	UBLCP1	Combined	Monocyte count	PMID:32888494	Vuckovic D	2020-09-01	408112			5_158873790_C_A	rs31196	2e-09	0.0135532	0.00912418	0.0179822				0.0303481	FALSE
GCST90025998	UBLCP1	Combined	Lung function (FVC)	PMID:34226706	Barton AR	2021-07-05	371898			5_158869988_C_T	rs2072495	8.3e-20	-0.0193054	-0.0235392	-0.0150716				0.0303129	TRUE
GCST004609	UBLCP1	Combined	Monocyte percentage of white cells	PMID:27863252	Astle WJ	2016-11-17	170494			5_158920153_ATG_A	rs1026987850	1.253e-10	0.0401419	0.0279111	0.0523728				0.030206	TRUE
GCST90056181	UBLCP1	Combined	Lymphocyte-to-monocyte ratio	PMID:34469753	Kachuri L	2021-08-26	234184	100284		5_158778557_G_A	rs56286460	5e-19							0.0300894	FALSE
GCST90018976	UBLCP1	Combined	Serum total protein level	PMID:34594039	Sakaue S	2021-09-30	448242			5_158880309_G_A	rs17652779	5e-13	-0.0224	-0.0284764	-0.0163236				0.030035	FALSE
FINNGEN_R6_FG_DISVEINLYMPH	UBLCP1	Combined	Diseases of veins lymphatic vessels and lymph nodes not elsewhere classified (FINNGEN)”		FINNGEN_R6	2022-01-24	165842	0	30021	5_158803005_G_T	rs11135046	1.74e-12				0.921558	0.900875	0.942715	0.0296827	TRUE
NEALE2_2395_4	UBLCP1	Combined	Pattern 4 | hair/balding pattern		UKB Neale v2	2018-08-01	165649	0	30225	5_158905372_T_C	rs17543752	2.3627e-100				0.822229	0.807538	0.837187	0.0296318	TRUE
GCST90025948	UBLCP1	Combined	Serum phosphate levels	PMID:34226706	Barton AR	2021-07-05	400159			5_159090225_T_G	rs13168903	1.6e-10	-0.0135726	-0.0178297	-0.00931554				0.029621	TRUE
GCST90011900	UBLCP1	Combined	Serum alkaline phosphatase levels	PMID:33547301	Chen VL	2021-02-05	390964	105030		5_159086538_T_C	rs6898290	2e-08	5.63	3.66371	7.59629				0.0295721	FALSE
GCST90013406	UBLCP1	Combined	Liver enzyme levels (alkaline phosphatase)	PMID:33972514	Pazoki R	2021-05-10	437438	315572		5_159086538_T_C	rs6898290	2e-16	0.00201993	0.00153841	0.00250145				0.0295721	FALSE
GCST90018942	UBLCP1	Combined	Serum alkaline phosphatase levels	PMID:34594039	Sakaue S	2021-09-30	463178			5_159086538_T_C	rs6898290	5e-18	0.0176	0.0136136	0.0215864				0.0295721	FALSE
GCST90011822	UBLCP1	Combined	Cancer (pleiotropy)	PMID:32887889	Rashkin SR	2020-09-04	475312		64962	5_158793185_A_G	rs31864	8e-09				1.07411	1.04833	1.10053	0.0295135	FALSE
GCST90025947	UBLCP1	Combined	Serum alkaline phosphatase levels	PMID:34226706	Barton AR	2021-07-05	437896			5_159090225_T_G	rs13168903	8.5e-19	0.0162481	0.0124694	0.0200268				0.0294685	TRUE
GCST007225	UBLCP1	Combined	Varicose veins	PMID:30566020	Fukaya E	2018-12-01	337536		9577	5_158803005_G_T	rs11135046	3e-16	-0.12	-0.148777	-0.0912235				0.0293728	FALSE
GCST008057	UBLCP1	Combined	Varicose veins	PMID:30998689	Shadrina AS	2019-04-18	408455		10861	5_158803005_G_T	rs11135046	3e-19	-0.003154	-0.00384327	-0.00246473				0.0293728	FALSE
GCST004278	UBLCP1	Combined	Pulse pressure	PMID:28135244	Warren HR	2017-01-30	140886	190318		5_158793185_A_G	rs31864	6e-11	-0.206	-0.267702	-0.144298				0.0293056	FALSE
GCST90001577	UBLCP1	Combined	Transitional B cell Absolute Count	PMID:32929287	Orru V	2020-09-14	3656			5_158890594_T_A	rs75512885	9e-09							0.029073	FALSE
GCST90025974	UBLCP1	Combined	Hemoglobin A1c levels	PMID:34226706	Barton AR	2021-07-05	437749			5_158804982_G_A	rs7719873	1.2e-08	0.0207962	0.0138798	0.0277125				0.0284691	TRUE
GCST90002389	UBLCP1	Combined	Lymphocyte percentage of white cells	PMID:32888494	Vuckovic D	2020-09-01	408112			5_158834867_C_G	rs78277239	4.2e-21	-0.0381494	-0.0460804	-0.0302184				0.0283814	TRUE
NEALE2_30180_raw	UBLCP1	Combined	Lymphocyte percentage		UKB Neale v2	2018-08-01	349861	0		5_158820370_T_C	rs4704963	2.234e-12	-0.227411	-0.290911	-0.163911				0.0283057	TRUE
GCST004988	UBLCP1	Combined	Breast cancer	PMID:29059683	Michailidou K	2017-10-23	139274	103745	76192	5_158817075_C_T	rs1432679	6.633e-31				0.93081	0.919567	0.94219	0.027977	TRUE
GCST90018950	UBLCP1	Combined	C-reactive protein	PMID:34594039	Sakaue S	2021-09-30	436491			5_158820370_T_C	rs4704963	8e-09	0.0244	0.0161094	0.0326906				0.0278992	FALSE
GCST90002357	UBLCP1	Combined	Platelet count	PMID:32888493	Chen MH	2020-09-01	542827			5_158819642_T_C	rs7720275	5e-15	-0.019271	-0.0240906	-0.0144514				0.0277796	TRUE
NEALE2_2395_3	UBLCP1	Combined	Pattern 3 | hair/balding pattern		UKB Neale v2	2018-08-01	165649	0	44304	5_158894394_G_GTAAA	rs368910700	4.03619e-17				0.934893	0.920343	0.949672	0.0274943	TRUE
GCST005116	UBLCP1	Combined	Male-pattern baldness	PMID:29146897	Pirastu N	2017-11-17	43590	31089	25662	5_158893869_C_G	rs1422798	2e-44							0.027493	FALSE
GCST90002406	UBLCP1	Combined	Reticulocyte fraction of red cells	PMID:32888494	Vuckovic D	2020-09-01	408112			5_158769734_A_C	rs6863275	4.1e-09	-0.0228538	-0.0304737	-0.0152339				0.0273731	TRUE
GCST90001392	UBLCP1	Combined	IgD+ CD38+ B cell Absolute Count	PMID:32929287	Orru V	2020-09-14	3656			5_158849602_G_A	rs80330977	6e-09	-0.2576	-0.3444	-0.1708				0.0272347	FALSE
GCST007429	UBLCP1	Combined	Lung function (FVC)	PMID:30804560	Shrine N	2019-02-25	321047	79005		5_158852630_G_A	rs891903	9.6e-18	-0.0233	-0.028592	-0.018008				0.0272339	TRUE
GCST006661	UBLCP1	Combined	Male-pattern baldness	PMID:28196072	Hagenaars SP	2017-02-14	52874			5_158893869_C_G	rs1422798	2.83676e-46	-0.0912062	-0.103723	-0.0786894				0.0271973	TRUE
GCST90002363	UBLCP1	Combined	Red blood cell count	PMID:32888493	Chen MH	2020-09-01	545203			5_159046516_C_T	rs4921252	2.86e-08	-0.016917	-0.0228872	-0.0109468				0.0269757	TRUE
NEALE2_2395_1	UBLCP1	Combined	Pattern 1 | hair/balding pattern		UKB Neale v2	2018-08-01	165649	0	53076	5_158890796_G_C	rs7737500	2.35492e-124				1.19762	1.17992	1.21559	0.0264149	TRUE
NEALE2_1389	UBLCP1	Combined	Pork intake		UKB Neale v2	2018-08-01	359115	0		5_158978835_C_G	rs6420102	4.58381e-08	-0.0137674	-0.0187033	-0.00883145				0.0263115	TRUE
GCST90018756	UBLCP1	Combined	Serum total protein level	PMID:34594039	Sakaue S	2021-09-30	133321			5_158901173_T_C	rs17658268	5e-08	-0.0292557	-0.0397745	-0.0187369				0.0261657	FALSE
NEALE2_30080_raw	UBLCP1	Combined	Platelet count		UKB Neale v2	2018-08-01	350474	0		5_158802816_C_T	rs10040653	8.29e-13	-1.78682	-2.27619	-1.29745				0.0261415	TRUE
GCST90020029	UBLCP1	Combined	Waist circumference adjusted for body mass index	PMID:34021172	Christakoudi S	2021-05-21	219872			5_158977121_A_G	rs2161356	3e-08	-0.0182	-0.0246373	-0.0117627				0.0257538	FALSE
GCST90002310	UBLCP1	Combined	Hemoglobin concentration	PMID:32888493	Chen MH	2020-09-01	563946			5_159049701_T_C	rs17645325	2.55e-09	-0.016708	-0.0221999	-0.0112161				0.0257182	TRUE
GCST90012112	UBLCP1	Combined	Total testosterone levels	PMID:32042192	Ruth KS	2020-02-10	230454			5_158825492_G_GA	rs33959428	8.3e-09	-0.0178627	-0.0238317	-0.0118937				0.025587	TRUE
NEALE2_23106_raw	UBLCP1	Combined	Impedance of whole body		UKB Neale v2	2018-08-01	354795	0		5_158978625_AT_A	rs1457565060	4.1082e-09	-0.998221	-1.33097	-0.665476				0.0253656	TRUE
GCST010989	UBLCP1	Combined	Body size at age 10	PMID:32376654	Richardson TG	2020-05-06	453169			5_159062307_A_G	rs7711823	9e-09	-0.00838771	-0.0112475	-0.00552789				0.0252938	FALSE
GCST90002384	UBLCP1	Combined	Hemoglobin	PMID:32888494	Vuckovic D	2020-09-01	408112			5_159049701_T_C	rs17645325	2e-08	-0.0181707	-0.0245128	-0.0118286				0.024868	TRUE
GCST90025991	UBLCP1	Combined	Serum urea levels	PMID:34226706	Barton AR	2021-07-05	437580			5_159010250_A_G	rs58785350	2.8e-09	-0.0220958	-0.0295041	-0.0146875				0.0247232	TRUE
GCST006629	UBLCP1	Combined	Pulse pressure	PMID:30224653	Evangelou E	2018-09-17	757601	249262		5_158940241_T_A	rs62385385	2e-34							0.0245905	FALSE
GCST003983	UBLCP1	Combined	Male-pattern baldness	PMID:27182965	Pickrell JK	2016-05-16	17500		9009	5_158940241_T_A	rs62385385	7e-22							0.0245893	FALSE
GCST004280	UBLCP1	Combined	Diastolic blood pressure	PMID:28135244	Warren HR	2017-01-30	140886	190318		5_159021393_G_C	rs888987	4e-08							0.0243855	FALSE
GCST007038	UBLCP1	Combined	Balding type 1	PMID:30595370	Kichaev G	2018-12-27	208000			5_159021393_G_C	rs888987	3e-23							0.0243855	FALSE
GCST010002	UBLCP1	Combined	Refractive error	PMID:32231278	Hysi PG	2020-03-30	542934			5_159070631_T_C	rs62385438	9e-18							0.0243059	FALSE
GCST90091061	UBLCP1	Combined	Cortical thickness	PMID:34560273	Shadrin AA	2021-09-21	35657			5_159014667_G_T	rs6862399	3e-09							0.0236972	FALSE
GCST90095131	UBLCP1	Combined	Vertex-wise cortical thickness	PMID:34910505	van der Meer D	2021-12-15	33748			5_159014667_G_T	rs6862399	4e-09	5.87	3.91473	7.82527				0.0236972	FALSE
NEALE2_20002_1065	UBLCP1	Combined	Hypertension | non-cancer illness code, self-reported		UKB Neale v2	2018-08-01	361141	0	93560	5_159017266_C_T	rs36071027	2.45e-13				0.960937	0.950742	0.971242	0.0234436	TRUE
NEALE2_6150_100	UBLCP1	Combined	None of the above | vascular/heart problems diagnosed by doctor		UKB Neale v2	2018-08-01	360420	0	106855	5_159017266_C_T	rs36071027	6.1e-14				1.03968	1.02917	1.0503	0.0234436	TRUE
NEALE2_6150_4	UBLCP1	Combined	High blood pressure | vascular/heart problems diagnosed by doctor		UKB Neale v2	2018-08-01	360420	0	97139	5_159017266_C_T	rs36071027	2.5e-13				0.961327	0.951226	0.971534	0.0234436	TRUE
GCST90002397	UBLCP1	Combined	Mean spheric corpuscular volume	PMID:32888494	Vuckovic D	2020-09-01	408112			5_158815537_G_A	rs13164506	1.3e-14	0.0213591	0.0159274	0.0267907				0.0234291	TRUE
GCST007038	UBLCP1	Combined	Balding type 1	PMID:30595370	Kichaev G	2018-12-27	208000			5_158916961_A_G	rs7736883	1e-158							0.0230986	FALSE
GCST007020	UBLCP1	Combined	Male-pattern baldness	PMID:30573740	Yap CX	2018-12-20	205327			5_158916961_A_G	rs7736883	4e-267	-0.138399	-0.146168	-0.13063				0.0229514	FALSE
GCST007930	UBLCP1	Combined	Medication use (agents acting on the renin-angiotensin system)	PMID:31015401	Wu Y	2019-04-23	237530		62752	5_159017266_C_T	rs36071027	7e-09	-0.0364146	-0.0487396	-0.0240897				0.0228521	FALSE
GCST90038604	UBLCP1	Combined	Hypertension	PMID:33959723	Donertas HM	2021-04-08	484598		129909	5_159017266_C_T	rs36071027	1.2e-12				0.993882	0.992182	0.995586	0.0228521	TRUE
GCST90012110	UBLCP1	Combined	Sex hormone-binding globulin levels adjusted for BMI	PMID:32042192	Ruth KS	2020-02-10	368929			5_158977121_A_G	rs2161356	7.9e-12	0.00659553	0.00469465	0.00849641				0.0226178	TRUE
GCST90018973	UBLCP1	Combined	Total bilirubin levels	PMID:34594039	Sakaue S	2021-09-30	467170			5_158918915_A_G	rs6869051	3e-08	-0.0153	-0.0207116	-0.00988841				0.0226056	FALSE
GCST007072	UBLCP1	Combined	Cardiovascular disease	PMID:30595370	Kichaev G	2018-12-27	459000			5_159017266_C_T	rs36071027	8e-11							0.0225842	FALSE
GCST90020190	UBLCP1	Combined	Total cerebellar volume (excluding Crus I vermis)	PMID:35079123	Chambers T	2022-01-25	33265			5_158969054_A_C	rs7380908	3e-09	0.0326	0.0218279	0.0433721				0.0225406	FALSE
GCST90091060	UBLCP1	Combined	Cortical surface area	PMID:34560273	Shadrin AA	2021-09-21	35657			5_158937441_G_A	rs72643433	6e-11							0.0224615	FALSE
GCST90095130	UBLCP1	Combined	Vertex-wise cortical surface area	PMID:34910505	van der Meer D	2021-12-15	33748			5_158937441_G_A	rs72643433	5e-13	7.22	5.26144	9.17856				0.0224239	FALSE
GCST90002304	UBLCP1	Combined	Hematocrit	PMID:32888493	Chen MH	2020-09-01	562259			5_159049701_T_C	rs17645325	2.23e-10	-0.017842	-0.0233496	-0.0123344				0.0221668	TRUE
GCST90002383	UBLCP1	Combined	Hematocrit	PMID:32888494	Vuckovic D	2020-09-01	408112			5_159049701_T_C	rs17645325	8.2e-09	-0.0186673	-0.0250143	-0.0123203				0.0221668	TRUE
GCST90019525	UBLCP1	Combined	Urea levels	PMID:33462484	Sinnott-Armstrong N	2021-01-18	355637			5_159049701_T_C	rs17645325	5e-12	-0.025	-0.0320957	-0.0179043				0.0221668	FALSE
GCST90025968	UBLCP1	Combined	Systolic blood pressure	PMID:34226706	Barton AR	2021-07-05	422713			5_159055819_T_C	rs11741461	6.7e-12	-0.0138382	-0.0178753	-0.00980107				0.0221668	TRUE
GCST90025981	UBLCP1	Combined	Diastolic blood pressure	PMID:34226706	Barton AR	2021-07-05	422713			5_159055819_T_C	rs11741461	5.3e-16	-0.0161862	-0.020218	-0.0121544				0.0221668	TRUE
NEALE2_23110_raw	UBLCP1	Combined	Impedance of arm (left)		UKB Neale v2	2018-08-01	354807	0		5_159061190_A_C	rs929779	6.38968e-09	0.540469	0.358028	0.72291				0.0220716	TRUE
GCST009004	UBLCP1	Combined	Body mass index	PMID:30239722	Pulit SL	2018-09-14	806834			5_159033204_G_A	rs7734385	6e-10	-0.0101	-0.0132978	-0.00690216				0.0220492	FALSE
GCST009871	UBLCP1	Combined	Body mass index	PMID:31669095	Zhu Z	2019-10-24	457822			5_159038094_C_G	rs62385430	6e-09							0.0220492	FALSE
GCST90018963	UBLCP1	Combined	Mean arterial pressure	PMID:34594039	Sakaue S	2021-09-30	506365			5_159033204_G_A	rs7734385	2e-13	-0.0146	-0.018494	-0.010706				0.0220492	FALSE
NEALE2_4079_raw	UBLCP1	Combined	Diastolic blood pressure, automated reading		UKB Neale v2	2018-08-01	340162	0		5_159043055_T_C	rs17717829	5.4232e-11	-0.158609	-0.206005	-0.111213				0.0219315	TRUE
GCST003114_2	UBLCP1	Combined	Carotid intima media thickness [Multiple-adjusted]	PMID:26343869	Xie G	2015-09-05	810			5_159017266_C_T	rs36071027	3e-09							0.0219194	FALSE
GCST90018952	UBLCP1	Combined	Diastolic blood pressure	PMID:34594039	Sakaue S	2021-09-30	485677			5_159035910_A_G	rs1363561	8e-12	-0.014	-0.0180125	-0.00998745				0.0218785	FALSE
GCST90025982	UBLCP1	Combined	Heel bone mineral density T score	PMID:34226706	Barton AR	2021-07-05	445855			5_158955789_C_A	rs6556376	9.7e-09	-0.0103296	-0.0140356	-0.00662357				0.0217356	TRUE
NEALE2_20150_raw	UBLCP1	Combined	Forced expiratory volume in 1-second (fev1), best measure		UKB Neale v2	2018-08-01	272338	0		5_158960553_G_A	rs36124395	5.584e-12	-0.0107165	-0.0137649	-0.00766805				0.0216396	TRUE
GCST90038595	UBLCP1	Combined	Cardiovascular disease	PMID:33959723	Donertas HM	2021-04-08	484598		177923	5_159017266_C_T	rs36071027	6.4e-10				0.994222	0.992383	0.996063	0.0216248	TRUE
NEALE2_50_raw	UBLCP1	Combined	Standing height		UKB Neale v2	2018-08-01	360388	0		5_158955636_G_A	rs6556375	3.635e-12	-0.104906	-0.134487	-0.0753249				0.0215931	TRUE
GCST009858	UBLCP1	Combined	Waist-to-hip ratio adjusted for BMI	PMID:31669095	Zhu Z	2019-10-24	457690			5_159061734_T_G	rs35297613	2e-08							0.0214149	FALSE
GCST90002399	UBLCP1	Combined	Neutrophil percentage of white cells	PMID:32888494	Vuckovic D	2020-09-01	408112			5_159012157_C_T	rs56356600	3.2e-11	0.0260981	0.0183892	0.033807				0.0212128	TRUE
GCST007432	UBLCP1	Combined	FEV1	PMID:30804560	Shrine N	2019-02-25	321047	79005		5_158937441_G_A	rs72643433	2.095e-12	-0.019	-0.024292	-0.013708				0.0204797	TRUE
NEALE2_3063_raw	UBLCP1	Combined	Forced expiratory volume in 1-second (fev1)		UKB Neale v2	2018-08-01	329404	0		5_158941789_T_A	rs7443323	4e-15	-0.0128514	-0.0160577	-0.00964508				0.0204707	TRUE
GCST90011874	UBLCP1	Combined	Noncognitive aspects of educational attainment	PMID:33414549	Demange PA	2021-01-07	510795			5_159006555_G_A	rs77581390	1e-09	-0.0849278	-0.112174	-0.0576816				0.0204117	FALSE
SAIGE_401	UBLCP1	Combined	Hypertension		UKB SAIGE	2018-10-24	408343	0	77977	5_159017266_C_T	rs36071027	1.92e-08				0.963098	0.950552	0.97581	0.0202909	TRUE
GCST008362	UBLCP1	Combined	Birth weight	PMID:31043758	Warrington NM	2019-05-01	321223			5_158983170_C_T	rs12153596	8e-09	-0.01533	-0.0205388	-0.0101212				0.0194136	FALSE
GCST007841	UBLCP1	Combined	Height	PMID:30595370	Kichaev G	2018-12-27	458000			5_158983170_C_T	rs12153596	4e-16							0.0193731	FALSE
GCST007081	UBLCP1	Combined	Lung function (FVC)	PMID:30595370	Kichaev G	2018-12-27	372000			5_158937441_G_A	rs72643433	1e-20							0.0193023	FALSE
SAIGE_401_1	UBLCP1	Combined	Essential hypertension		UKB SAIGE	2018-10-24	408089	0	77723	5_159017266_C_T	rs36071027	1.73e-08				0.963002	0.950438	0.975732	0.0191062	TRUE
GCST005990	UBLCP1	Combined	Non-albumin protein levels	PMID:29403010	Kanai M	2018-02-05	98538			5_158920763_A_G	rs77695390	2e-09							0.018915	FALSE
GCST90095129	UBLCP1	Combined	Vertex-wise sulcal depth	PMID:34910505	van der Meer D	2021-12-15	33748			5_158937441_G_A	rs72643433	3e-33	12.01	10.0507	13.9693				0.0188633	FALSE
NEALE2_20151_raw	UBLCP1	Combined	Forced vital capacity (fvc), best measure		UKB Neale v2	2018-08-01	272338	0		5_158941789_T_A	rs7443323	1e-15	-0.0172791	-0.0215068	-0.0130514				0.0188633	TRUE
NEALE2_3062_raw	UBLCP1	Combined	Forced vital capacity (fvc)		UKB Neale v2	2018-08-01	329404	0		5_158941789_T_A	rs7443323	4.52957e-20	-0.0194626	-0.0236202	-0.015305				0.0188633	TRUE
GCST90000027	UBLCP1	Combined	Appendicular lean mass	PMID:33097823	Pei YF	2020-10-23	244730			5_158913864_G_C	rs7737883	3.2e-12	-0.0200655	-0.0261069	-0.0140241				0.01884	TRUE
GCST90000025	UBLCP1	Combined	Appendicular lean mass	PMID:33097823	Pei YF	2020-10-23	450243			5_158913864_G_C	rs7737883	1.705e-10	-0.0146	-0.019108	-0.010092				0.0185883	TRUE
NEALE2_6153_2	UBLCP1	Combined	Blood pressure medication | medication for cholesterol, blood pressure, diabetes, or take exogenous hormones		UKB Neale v2	2018-08-01	193148	0	33519	5_158921904_A_C	rs4130208	1.61719e-08				0.946849	0.929075	0.964963	0.0185343	TRUE
NEALE2_3143_raw	UBLCP1	Combined	Ankle spacing width		UKB Neale v2	2018-08-01	206589	0		5_159062307_A_G	rs7711823	4.1925e-09	-0.0751666	-0.100236	-0.0500968				0.0176098	TRUE
GCST90002316	UBLCP1	Combined	Lymphocyte counts	PMID:32888493	Chen MH	2020-09-01	524923			5_159538767_G_A	rs10476298	2.02e-11	-0.013441	-0.0173669	-0.00951512				0.0169104	TRUE
GCST90002316	UBLCP1	Combined	Lymphocyte counts	PMID:32888493	Chen MH	2020-09-01	524923			5_159779137_G_A	rs76952916	2.41e-10	0.025864	0.0178652	0.0338628				0.0107811	TRUE
GCST004278	MED31	Combined	Pulse pressure	PMID:28135244	Warren HR	2017-01-30	140886	190318		17_6570508_T_C	rs7226020	2e-14	0.256	0.190416	0.321584				0.228965	FALSE
GCST007096	MED31	Combined	Pulse pressure	PMID:27841878	Hoffmann TJ	2016-11-14	321262			17_6570508_T_C	rs7226020	2e-17	0.232	0.178464	0.285536				0.208066	FALSE
GCST90018970	MED31	Combined	Pulse pressure	PMID:34594039	Sakaue S	2021-09-30	506308			17_6570508_T_C	rs7226020	4e-18	0.0163	0.0126188	0.0199812				0.206435	FALSE
GCST007267	MED31	Combined	Systolic blood pressure	PMID:30578418	Giri A	2018-12-21	459777	316301		17_6576133_A_G	rs12937989	7e-11	0.2313	0.161775	0.300825				0.195389	FALSE
GCST90025968	MED31	Combined	Systolic blood pressure	PMID:34226706	Barton AR	2021-07-05	422713			17_6590071_C_T	rs2278646	7.8e-11	0.0141083	0.00987838	0.0183382				0.166952	TRUE
GCST90025949	MED31	Combined	Height	PMID:34226706	Barton AR	2021-07-05	458235			17_6590071_C_T	rs2278646	7.5e-09	0.00991531	0.00667594	0.0131547				0.165668	TRUE
GCST007269	MED31	Combined	Pulse pressure	PMID:30578418	Giri A	2018-12-21	459777	316301		17_6570508_T_C	rs7226020	2e-25	-0.2759	-0.327794	-0.224006				0.1298	FALSE
GCST007432	MED31	Combined	FEV1	PMID:30804560	Shrine N	2019-02-25	321047	79005		17_6573534_G_T	rs1867236	5.957e-09	-0.0135	-0.018008	-0.008992				0.124346	TRUE
GCST007268	MED31	Combined	Diastolic blood pressure	PMID:30578418	Giri A	2018-12-21	459777	316301		17_6567278_G_A	rs2009598	6e-10	-0.1674	-0.220402	-0.114398				0.120877	FALSE
GCST007066	MED31	Combined	Heel bone mineral density	PMID:30595370	Kichaev G	2018-12-27	446000			17_6681559_A_G	rs680625	2e-08							0.108638	FALSE
GCST007841	MED31	Combined	Height	PMID:30595370	Kichaev G	2018-12-27	458000			17_6643601_C_G	rs2240276	2e-09							0.107902	FALSE
GCST009867	MED31	Combined	Waist circumference adjusted for body mass index	PMID:31669095	Zhu Z	2019-10-24	457690			17_6648300_T_C	rs2871289	9e-09							0.100356	FALSE
GCST011568	MED31	Combined	Ebbinghaus illusion (overestimation)	PMID:32939015	Zhu Z	2020-09-16	1986	839		17_6685267_G_A	rs6502966	1e-09							0.0876143	FALSE
GCST90012112	MED31	Combined	Total testosterone levels	PMID:32042192	Ruth KS	2020-02-10	230454			17_6622541_T_C	rs9898480	9.8e-12	-0.0182946	-0.0238392	-0.01275				0.0812626	TRUE
GCST90000062	MED31	Combined	Systolic blood pressure	PMID:33230300	Surendran P	2020-11-23	810865	354096		17_6608461_A_G	rs4796519	6.258e-11	0.0103802	0.00726809	0.0134923				0.0811239	TRUE
GCST90000061	MED31	Combined	Pulse pressure	PMID:33230300	Surendran P	2020-11-23	810865	354096		17_6620978_T_A	rs9889363	9.264e-25	0.018748	0.0151713	0.0223247				0.0779301	TRUE
GCST007087	MED31	Combined	Systolic blood pressure	PMID:30595370	Kichaev G	2018-12-27	422000			17_6570339_C_T	rs10521146	1e-11							0.0742962	FALSE
GCST90010198	MED31	Combined	Scavenger receptor cysteine-rich type 1 protein M130 levels	PMID:33303764	Gilly A	2020-12-10	1323			17_6945612_G_T	rs184746253	2.46125e-08	1.51178	0.9899	2.03367				0.0525033	TRUE
GCST003666_3	MED31	Combined	Metabolite levels (small molecules and protein measures) [Citrate]	PMID:27005778	Kettunen J	2016-03-23	24925			17_6692079_A_C	rs172642	5e-18	0.08	0.0618799	0.0981201				0.0250715	FALSE
GCST002443_114	MED31	Combined	Blood metabolite levels [citrate]	PMID:24816252	Shin SY	2014-05-11	7824			17_6692611_G_A	rs170149	1e-13	0.026	0.0191514	0.0328486				0.0238131	FALSE
GCST006012	MED31	Combined	C-reactive protein levels	PMID:29403010	Kanai M	2018-02-05	75391			17_6258465_C_T	rs151233628	2e-09							0.0229226	FALSE
GCST011350	MED31	Combined	C-reactive protein levels	PMID:33339817	Nielsen JB	2020-12-18	203476			17_6258465_C_T	rs151233628	3e-08							0.0229226	FALSE
GCST90025947	MED31	Combined	Serum alkaline phosphatase levels	PMID:34226706	Barton AR	2021-07-05	437896			17_7101260_T_C	rs66857341	1.8e-48	-0.0484755	-0.0554	-0.041551				0.0211043	TRUE
GCST90025947	MED31	Combined	Serum alkaline phosphatase levels	PMID:34226706	Barton AR	2021-07-05	437896			17_7109023_C_T	rs117175198	2.6e-16	-0.0377264	-0.0467807	-0.0286721				0.0211043	TRUE
GCST90025952	MED31	Combined	Apolipoprotein B levels	PMID:34226706	Barton AR	2021-07-05	435744			17_7108935_C_T	rs146261845	9.2e-97	-0.241988	-0.265636	-0.21834				0.0211043	TRUE
GCST90025953	MED31	Combined	Total cholesterol levels	PMID:34226706	Barton AR	2021-07-05	437878			17_7108935_C_T	rs146261845	3.2e-48	-0.176826	-0.200766	-0.152886				0.0211043	TRUE
GCST90025954	MED31	Combined	Direct low density lipoprotein cholesterol levels	PMID:34226706	Barton AR	2021-07-05	437068			17_7108935_C_T	rs146261845	3e-68	-0.208435	-0.232431	-0.184439				0.0211043	TRUE
GCST90025957	MED31	Combined	Triglyceride levels	PMID:34226706	Barton AR	2021-07-05	437532			17_7108935_C_T	rs146261845	3e-15	-0.0917414	-0.114768	-0.0687147				0.0211043	TRUE
GCST90025959	MED31	Combined	C-reactive protein levels	PMID:34226706	Barton AR	2021-07-05	436939			17_7108935_C_T	rs146261845	1.6e-32	0.130641	0.107346	0.153936				0.0211043	TRUE
GCST90025992	MED31	Combined	Serum albumin levels	PMID:34226706	Barton AR	2021-07-05	400938			17_7108935_C_T	rs146261845	1e-28	-0.138487	-0.163413	-0.113561				0.0211043	TRUE
GCST90002310	MED31	Combined	Hemoglobin concentration	PMID:32888493	Chen MH	2020-09-01	563946			17_7116978_T_C	rs535064984	1.12e-11	0.086134	0.061291	0.110977				0.021049	TRUE
GCST90002384	MED31	Combined	Hemoglobin	PMID:32888494	Vuckovic D	2020-09-01	408112			17_7116978_T_C	rs535064984	2.2e-11	0.0905107	0.0640007	0.117021				0.021049	TRUE
GCST90012108	MED31	Combined	Sex hormone-binding globulin levels adjusted for BMI	PMID:32042192	Ruth KS	2020-02-10	180094			17_7138216_C_G	rs113546301	1.1e-34	-0.0895017	-0.103633	-0.0753702				0.021049	TRUE
GCST90012110	MED31	Combined	Sex hormone-binding globulin levels adjusted for BMI	PMID:32042192	Ruth KS	2020-02-10	368929			17_7138216_C_G	rs113546301	4.2e-64	-0.0865405	-0.0968261	-0.0762549				0.021049	TRUE
GCST90012111	MED31	Combined	Sex hormone-binding globulin levels	PMID:32042192	Ruth KS	2020-02-10	370125			17_7138216_C_G	rs113546301	1.9e-50	-0.0867927	-0.0983444	-0.075241				0.021049	TRUE
GCST90025947	MED31	Combined	Serum alkaline phosphatase levels	PMID:34226706	Barton AR	2021-07-05	437896			17_6925605_A_G	rs77783523	1.7e-13	0.0302368	0.0223422	0.0381314				0.0204582	TRUE
GCST90012107	MED31	Combined	Sex hormone-binding globulin levels	PMID:32042192	Ruth KS	2020-02-10	189473			17_7070212_C_T		9.7e-16	-0.0782066	-0.097343	-0.0590702				0.0202176	TRUE
GCST90025990	MED31	Combined	Calcium levels	PMID:34226706	Barton AR	2021-07-05	400792			17_6703699_G_A	rs218676	1.2e-09	0.0161651	0.0106133	0.0217169				0.0201312	TRUE
GCST90025990	MED31	Combined	Calcium levels	PMID:34226706	Barton AR	2021-07-05	400792			17_6780559_C_T	rs1509123	1.1e-10	-0.0283396	-0.0371062	-0.019573				0.0199276	TRUE
GCST90012106	MED31	Combined	Sex hormone-binding globulin levels adjusted for BMI	PMID:32042192	Ruth KS	2020-02-10	188908			17_7050589_T_C	rs190629532	6.1e-70	-0.16278	-0.181149	-0.144411				0.0199187	TRUE
GCST90012108	MED31	Combined	Sex hormone-binding globulin levels adjusted for BMI	PMID:32042192	Ruth KS	2020-02-10	180094			17_7050589_T_C	rs190629532	8.3e-73	-0.152688	-0.169363	-0.136013				0.0199187	TRUE
GCST90012108	MED31	Combined	Sex hormone-binding globulin levels adjusted for BMI	PMID:32042192	Ruth KS	2020-02-10	180094			17_7059583_T_C	rs181241478	3.3e-12	0.0145379	0.00989486	0.0191809				0.0199187	TRUE
GCST90012109	MED31	Combined	Sex hormone-binding globulin levels	PMID:32042192	Ruth KS	2020-02-10	180726			17_7050589_T_C	rs190629532	4.8e-65	-0.153903	-0.171811	-0.135995				0.0199187	TRUE
GCST90012109	MED31	Combined	Sex hormone-binding globulin levels	PMID:32042192	Ruth KS	2020-02-10	180726			17_7059583_T_C	rs181241478	1.8e-09	0.0138047	0.00881899	0.0187904				0.0199187	TRUE
GCST90012110	MED31	Combined	Sex hormone-binding globulin levels adjusted for BMI	PMID:32042192	Ruth KS	2020-02-10	368929			17_7050589_T_C	rs190629532	5.1e-122	-0.143953	-0.156197	-0.131709				0.0199187	TRUE
GCST90012110	MED31	Combined	Sex hormone-binding globulin levels adjusted for BMI	PMID:32042192	Ruth KS	2020-02-10	368929			17_7059606_C_T	rs573764538	3.1e-21	0.0149384	0.0115725	0.0183043				0.0199187	TRUE
GCST90012111	MED31	Combined	Sex hormone-binding globulin levels	PMID:32042192	Ruth KS	2020-02-10	370125			17_7059606_C_T	rs573764538	4e-13	0.0129103	0.00912719	0.0166934				0.0199187	TRUE
NEALE2_30110_raw	MED31	Combined	Platelet distribution width		UKB Neale v2	2018-08-01	350470	0		17_6996757_G_A	rs2073438	1.37469e-10	0.00862426	0.00599084	0.0112577				0.01984	TRUE
GCST90002316	MED31	Combined	Lymphocyte counts	PMID:32888493	Chen MH	2020-09-01	524923			17_7011451_C_T	rs11571354	5.08e-10	0.023214	0.0159012	0.0305268				0.0198228	TRUE
GCST90002346	MED31	Combined	Mean platelet volume	PMID:32888493	Chen MH	2020-09-01	460935			17_7007669_G_C	rs434844	3.21e-12	-0.013648	-0.0174837	-0.00981228				0.0198228	TRUE
GCST90002395	MED31	Combined	Mean platelet volume	PMID:32888494	Vuckovic D	2020-09-01	408112			17_7007669_G_C	rs434844	1.8e-10	-0.0133119	-0.0174053	-0.00921848				0.0198228	TRUE
GCST90002397	MED31	Combined	Mean spheric corpuscular volume	PMID:32888494	Vuckovic D	2020-09-01	408112			17_7033923_C_T	rs62058725	1.5e-08	0.0234423	0.0153239	0.0315607				0.0198228	TRUE
GCST90002401	MED31	Combined	Platelet distribution width	PMID:32888494	Vuckovic D	2020-09-01	408112			17_7028821_A_C	rs10521149	5.5e-12	-0.0299042	-0.0384084	-0.0214				0.0198228	TRUE
NEALE2_30100_raw	MED31	Combined	Mean platelet (thrombocyte) volume		UKB Neale v2	2018-08-01	350470	0		17_7007669_G_C	rs434844	1.9e-14	-0.020119	-0.0252663	-0.0149717				0.0198228	TRUE
NEALE2_20498	MED31	Combined	Felt very upset when reminded of stressful experience in past month		UKB Neale v2	2018-08-01	117893	0		17_6301408_A_T	rs917487	1.14603e-08	-0.0203827	-0.0273817	-0.0133837				0.0183372	TRUE
GCST90026658	MED31	Combined	Total protein levels x insomnia interaction	PMID:34343768	Chu X	2021-07-01	171574		93452	17_6722066_C_A	rs11658922	5e-10							0.0177966	FALSE
NEALE2_20003_1140864070	MED31	Combined	Kapake tablet | treatment/medication code		UKB Neale v2	2018-08-01	361141	0	104	17_7032197_AC_A	rs374857465	4.742e-08				5.11142	2.84595	9.18026	0.0173194	TRUE
GCST90025990	MED31	Combined	Calcium levels	PMID:34226706	Barton AR	2021-07-05	400792			17_6695969_C_T	rs77795940	5.4e-10	0.0313312	0.0216009	0.0410615				0.0166276	TRUE
GCST90019500	MED31	Combined	Calcium levels	PMID:33462484	Sinnott-Armstrong N	2021-01-18	325659			17_6709581_T_C	rs73342502	4e-10	0.0346	0.0237564	0.0454436				0.0158751	FALSE
GCST012398	MED31	Combined	Calcium levels	PMID:33887147	Young WJ	2021-04-22	305349			17_6711540_TTTTGTGTGTGTG_T	rs139436709	2e-13	0.002457	0.00180169	0.00311231				0.0158619	FALSE
GCST90018951	MED31	Combined	Calcium levels	PMID:34594039	Sakaue S	2021-09-30	399133			17_6711540_TTTTGTGTGTGTG_T	rs139436709	2e-12	0.0262	0.0189	0.0335				0.0158619	FALSE
GCST90061435	MED31	Combined	Externalizing behaviour (multivariate analysis)	PMID:34446935	Karlsson Linner R	2021-08-26	1492085			17_6458794_C_T	rs1105916	2e-08	0.006	0.00390449	0.00809551				0.0140702	FALSE
GCST003124	MED31	Combined	Mild influenza (H1N1) infection	PMID:26379185	Garcia-Etxebarria K	2015-09-17	656		107	17_6803942_A_G	rs9635710	2e-08							0.0132105	FALSE
GCST010341	MED31	Combined	Diffuse plaques (SNP x SNP interaction)	PMID:32450446	Wang H	2020-04-29	1316			17_6767713_A_G	rs9891567	1e-08							0.012492	FALSE
GCST002443_114	MED31	Combined	Blood metabolite levels [citrate]	PMID:24816252	Shin SY	2014-05-11	7824			17_6780559_C_T	rs1509123	5e-09	-0.025	-0.0333801	-0.0166199				0.0114928	FALSE
GCST009163_4	MED31	Combined	Hormone measurements [Free thyroxine (FT4]	PMID:23696881	Wood AR	2013-05-16	1200			17_6438550_A_G	rs58926603	6e-09							0.0109582	FALSE
GCST90044752	MED31	Combined	Android fat/gynoid fat ratio	PMID:34239500	Livingstone KM	2021-06-22	2109			17_6386663_G_C	rs1567843	4e-08							0.0109334	FALSE
NEALE2_20002_1473	MED31	Combined	High cholesterol | non-cancer illness code, self-reported		UKB Neale v2	2018-08-01	361141	0	43957	17_7116978_T_C	rs535064984	5.812e-11				0.74863	0.686492	0.816393	0.0104603	TRUE
GCST90013406	MED31	Combined	Liver enzyme levels (alkaline phosphatase)	PMID:33972514	Pazoki R	2021-05-10	437438	315572		17_7115730_G_C	rs3760353	7e-15							0.00996324	FALSE
GCST007074	MED31	Combined	Red cell distribution width	PMID:30595370	Kichaev G	2018-12-27	445000			17_7138220_A_G	rs72837670	3e-08							0.0098834	FALSE
GCST008478_7	MED31	Combined	Neurological blood protein biomarker levels [CLEC10A]	PMID:31320639	Hillary RF	2019-07-18	750			17_7079125_A_G	rs444207	2e-12	0.38155	0.27524	0.48786				0.00983484	FALSE
GCST90025960	MED31	Combined	Mean platelet volume	PMID:34226706	Barton AR	2021-07-05	445364			17_6996757_G_A	rs2073438	1.5e-09	0.0108951	0.00706563	0.0147246				0.00980989	TRUE
GCST90025947	MED31	Combined	Serum alkaline phosphatase levels	PMID:34226706	Barton AR	2021-07-05	437896			17_7108935_C_T	rs146261845	0	0.870229	0.848151	0.892307				0.00966889	TRUE
GCST008478_7	MED31	Combined	Neurological blood protein biomarker levels [CLEC10A]	PMID:31320639	Hillary RF	2019-07-18	750			17_7131251_C_T	rs12941354	2e-12	0.99147	0.715219	1.26772				0.00965714	FALSE
GCST90025989	MED31	Combined	Insulin-like growth factor 1 levels	PMID:34226706	Barton AR	2021-07-05	435516			17_7108935_C_T	rs146261845	7.6e-13	0.0768611	0.0539146	0.0998076				0.00963207	TRUE
GCST010118	MED31	Combined	Type 2 diabetes	PMID:32499647	Spracklen CN	2020-05-06	433540		77418	17_7050462_C_T	rs186568031	9e-24				1.12	1.09552	1.14502	0.00959303	FALSE
GCST002128	MED31	Combined	Type 2 diabetes	PMID:23945395	Hara K	2013-08-14	26805	38401	5976	17_7037074_G_A	rs312457	8e-13				0.833333	0.79277	0.875973	0.00954639	FALSE
GCST007847	MED31	Combined	Type 2 diabetes	PMID:30718926	Suzuki K	2019-02-04	191764		36614	17_7044134_C_G	rs74577409	6e-16							0.00952359	FALSE
GCST90013693	MED31	Combined	Type 2 diabetes	PMID:32514122	Ishigaki K	2020-06-08	210865		40250	17_7042164_C_T	rs75418188	6e-18				1.14132	1.10757	1.17609	0.00952359	FALSE
GCST90018706	MED31	Combined	Type 2 diabetes	PMID:34594039	Sakaue S	2021-09-30	177415		45383	17_7042621_A_G	rs13342232	7e-19	0.151117	0.117743	0.184491				0.00952359	FALSE
GCST90018761	MED31	Combined	Medication use (drugs used in diabetes)	PMID:34594039	Sakaue S	2021-09-30	178726		30515	17_7042164_C_T	rs75418188	9e-16	0.146778	0.110995	0.182561				0.00952359	FALSE
GCST90002399	MED31	Combined	Neutrophil percentage of white cells	PMID:32888494	Vuckovic D	2020-09-01	408112			17_6999491_A_T	rs11571333	1.9e-08	-0.0250919	-0.0338385	-0.0163453				0.00943464	TRUE
GCST010557	MED31	Combined	Type 2 diabetes	PMID:32541925	Vujkovic M	2020-06-15	1407282		228499	17_7050239_C_T	rs73239895	3e-15	0.0869	0.0653152	0.108485				0.00933373	FALSE
GCST012043	MED31	Combined	Childhood onset type 2 diabetes	PMID:33479058	Srinivasan S	2021-01-21	9067		3006	17_7049836_G_A	rs113748381	4e-08				1.04	1.02554	1.05466	0.00931143	FALSE
GCST003400_2	MED31	Combined	Type 2 diabetes [Japanese]	PMID:26818947	Imamura M	2016-01-28	41646	237441	15463	17_7042164_C_T	rs75418188	8e-11				1.1987	1.13495	1.26602	0.00928834	FALSE
GCST90018926	MED31	Combined	Type 2 diabetes	PMID:34594039	Sakaue S	2021-09-30	667504		84224	17_7042164_C_T	rs75418188	2e-17	0.1337	0.102848	0.164552				0.00928834	FALSE
GCST002317	MED31	Combined	Type 2 diabetes	PMID:24390345	Williams AL	2013-12-25	8214	22245	3848	17_7041768_G_T	rs75493593	5e-15							0.00926615	FALSE
GCST010553	MED31	Combined	Type 2 diabetes	PMID:32541925	Vujkovic M	2020-06-15	216287		46511	17_7042621_A_G	rs13342232	1e-15	0.1297	0.0980298	0.16137				0.00926615	FALSE
GCST90002389	MED31	Combined	Lymphocyte percentage of white cells	PMID:32888494	Vuckovic D	2020-09-01	408112			17_6999491_A_T	rs11571333	5.3e-09	0.0259838	0.0172613	0.0347063				0.00926615	TRUE
GCST90018981	MED31	Combined	Medication use (drugs used in diabetes)	PMID:34594039	Sakaue S	2021-09-30	484639		45787	17_7042164_C_T	rs75418188	9e-16	0.1468	0.111012	0.182588				0.00926615	FALSE
GCST008478_7	MED31	Combined	Neurological blood protein biomarker levels [CLEC10A]	PMID:31320639	Hillary RF	2019-07-18	750			17_7081518_C_T	rs2002664	6e-14	0.58775	0.434317	0.741183				0.00921816	FALSE
GCST008839	MED31	Combined	Height	PMID:31562340	Akiyama M	2019-09-27	159095	32692		17_7018350_G_A	rs78088233	5e-13							0.00901733	FALSE
GCST90018729	MED31	Combined	Weight	PMID:34594039	Sakaue S	2021-09-30	165419			17_7048416_A_G	rs76484228	9e-10	0.0296949	0.0201944	0.0391954				0.00901733	FALSE
NEALE2_30180_raw	MED31	Combined	Lymphocyte percentage		UKB Neale v2	2018-08-01	349861	0		17_6999491_A_T	rs11571333	1.6136e-11	0.241158	0.171003	0.311313				0.00900611	TRUE
NEALE2_30200_raw	MED31	Combined	Neutrophill percentage		UKB Neale v2	2018-08-01	349861	0		17_6999491_A_T	rs11571333	3.269e-12	-0.287694	-0.368643	-0.206745				0.00900611	TRUE
GCST002443_71	MED31	Combined	Blood metabolite levels [X-12441--12-hydroxyeicosatetraenoate (12-HETE]	PMID:24816252	Shin SY	2014-05-11	7824			17_7012082_C_G	rs2271316	2e-23							0.00899578	FALSE
GCST012020_53	MED31	Combined	Serum metabolite levels [12-HETE]	PMID:33031748	Feofanova EV	2020-10-01	3926			17_7012082_C_G	rs2271316	5e-21							0.00899578	FALSE
GCST90025960	MED31	Combined	Mean platelet volume	PMID:34226706	Barton AR	2021-07-05	445364			17_7006519_A_G	rs2307214	2.2e-09	0.0193311	0.0126097	0.0260525				0.00891457	TRUE
GCST90025984	MED31	Combined	Lymphocyte counts	PMID:34226706	Barton AR	2021-07-05	443762			17_7004900_A_G	rs11571340	3.2e-09	0.0221889	0.0146052	0.0297726				0.00891457	TRUE
GCST90026658	SCUBE2	Combined	Total protein levels x insomnia interaction	PMID:34343768	Chu X	2021-07-01	171574		93452	11_9071939_C_T	rs7929797	1e-08							0.858004	FALSE
GCST007432	SCUBE2	Combined	FEV1	PMID:30804560	Shrine N	2019-02-25	321047	79005		11_9057129_C_T	rs34191466	1.159e-09	0.0178	0.012116	0.023484				0.672715	TRUE
GCST007067	SCUBE2	Combined	Waist-hip ratio	PMID:30595370	Kichaev G	2018-12-27	458000			11_9038003_A_G	rs10743098	3e-09							0.616948	FALSE
GCST90002397	SCUBE2	Combined	Mean spheric corpuscular volume	PMID:32888494	Vuckovic D	2020-09-01	408112			11_9022956_C_T	rs72856027	5.5e-09	-0.0193675	-0.0258778	-0.0128572				0.532401	TRUE
GCST007074	SCUBE2	Combined	Red cell distribution width	PMID:30595370	Kichaev G	2018-12-27	445000			11_8845962_G_C	rs7937298	6e-12							0.167424	FALSE
GCST90095130	SCUBE2	Combined	Vertex-wise cortical surface area	PMID:34910505	van der Meer D	2021-12-15	33748			11_8919668_A_G	rs4910157	6e-09	5.83	3.86554	7.79446				0.151723	FALSE
GCST008733	SCUBE2	Combined	Waist-to-hip ratio adjusted for BMI	PMID:30575882	Lotta LA	2018-12-01	660648			11_9003083_G_A	rs6486060	2e-10	-0.012	-0.0156973	-0.00830267				0.149221	FALSE
GCST008734	SCUBE2	Combined	Waist-hip ratio	PMID:30575882	Lotta LA	2018-12-01	663598			11_9003083_G_A	rs6486060	5e-08							0.147325	FALSE
GCST012228	SCUBE2	Combined	Waist-hip index	PMID:34021172	Christakoudi S	2021-05-21	186825			11_9003083_G_A	rs6486060	5e-08	-0.0172574	-0.0234622	-0.0110526				0.147325	FALSE
GCST90025978	SCUBE2	Combined	Lung function (FEV1/FVC)	PMID:34226706	Barton AR	2021-07-05	371898			11_9203939_C_G	rs952374	9.1e-12	0.0155912	0.0109076	0.0202748				0.145558	TRUE
GCST008995	SCUBE2	Combined	Waist-to-hip ratio adjusted for BMI	PMID:30239722	Pulit SL	2018-09-14	315284			11_9003083_G_A	rs6486060	6e-09	-0.0106	-0.0141717	-0.00702825				0.144195	FALSE
GCST010702	SCUBE2	Combined	Subcortical volume (MOSTest)	PMID:32665545	van der Meer D	2020-07-14	26502			11_9014382_T_C	rs1984775	1e-09							0.11097	FALSE
GCST90002310	SCUBE2	Combined	Hemoglobin concentration	PMID:32888493	Chen MH	2020-09-01	563946			11_8856157_T_C	rs7948452	1.38e-32	0.024185	0.0202003	0.0281697				0.10746	TRUE
GCST90002310	SCUBE2	Combined	Hemoglobin concentration	PMID:32888493	Chen MH	2020-09-01	563946			11_8855305_C_T	rs2742552	8.41e-48	0.026828	0.0232098	0.0304462				0.107026	TRUE
GCST90025960	SCUBE2	Combined	Mean platelet volume	PMID:34226706	Barton AR	2021-07-05	445364			11_8817682_G_C	rs11042082	9e-15	0.013001	0.00955028	0.0164517				0.0964855	TRUE
GCST90025985	SCUBE2	Combined	White blood cell count	PMID:34226706	Barton AR	2021-07-05	444734			11_8807621_A_G	rs2292049	1.5e-12	-0.0153729	-0.0198324	-0.0109134				0.0907133	TRUE
GCST90025964	SCUBE2	Combined	Red blood cell count	PMID:34226706	Barton AR	2021-07-05	445305			11_8855305_C_T	rs2742552	5.2e-32	0.0220833	0.0183375	0.0258291				0.0816753	TRUE
GCST010703	SCUBE2	Combined	Brain morphology (MOSTest)	PMID:32665545	van der Meer D	2020-07-14	26502			11_8937964_T_G	rs4910179	5e-09							0.0706996	FALSE
GCST007070	SCUBE2	Combined	White blood cell count	PMID:30595370	Kichaev G	2018-12-27	444000			11_8801946_C_T	rs7120300	2e-13							0.0675175	FALSE
GCST90000063	SCUBE2	Combined	Diastolic blood pressure	PMID:33230300	Surendran P	2020-11-23	870217	447667		11_8911517_G_A	rs1133833	3e-09	0.0896797	0.0600465	0.119313				0.066604	FALSE
GCST90002393	SCUBE2	Combined	Monocyte count	PMID:32888494	Vuckovic D	2020-09-01	408112			11_8801946_C_T	rs7120300	3e-12	0.0175713	0.0126357	0.022507				0.0615139	FALSE
GCST007080	SCUBE2	Combined	Lung function (FEV1/FVC)	PMID:30595370	Kichaev G	2018-12-27	370000			11_9240945_T_G	rs9888193	2e-11							0.0614126	FALSE
GCST007431	SCUBE2	Combined	Lung function (FEV1/FVC)	PMID:30804560	Shrine N	2019-02-25	321047	79005		11_9240945_T_G	rs9888193	2.42e-08	0.0148	0.009704	0.019896				0.0553432	TRUE
GCST90025978	SCUBE2	Combined	Lung function (FEV1/FVC)	PMID:34226706	Barton AR	2021-07-05	371898			11_8805232_A_G	rs10840128	4.1e-09	-0.0141347	-0.019045	-0.00922443				0.0435338	TRUE
NEALE2_30080_raw	SCUBE2	Combined	Platelet count		UKB Neale v2	2018-08-01	350474	0		11_8824555_G_T	rs11042093	2.99869e-29	-1.55858	-1.83065	-1.28651				0.0423797	TRUE
GCST90018957	SCUBE2	Combined	Hemoglobin	PMID:34594039	Sakaue S	2021-09-30	502921			11_8847582_A_G	rs10743093	7e-27	-0.0174	-0.020577	-0.014223				0.0393212	FALSE
GCST90002407	SCUBE2	Combined	White blood cell count	PMID:32888494	Vuckovic D	2020-09-01	408112			11_8801946_C_T	rs7120300	1.6e-13	-0.0178275	-0.0225651	-0.0130899				0.0390637	TRUE
GCST90025984	SCUBE2	Combined	Lymphocyte counts	PMID:34226706	Barton AR	2021-07-05	443762			11_8855305_C_T	rs2742552	3.3e-08	0.0111426	0.00726331	0.0150219				0.0385935	TRUE
GCST90002398	SCUBE2	Combined	Neutrophil count	PMID:32888494	Vuckovic D	2020-09-01	408112			11_8801946_C_T	rs7120300	6.1e-11	-0.0159832	-0.020773	-0.0111934				0.0359662	TRUE
GCST90018968	SCUBE2	Combined	Neutrophil count	PMID:34594039	Sakaue S	2021-09-30	432666			11_8801946_C_T	rs7120300	8e-11	-0.0153	-0.0199131	-0.0106869				0.0359246	FALSE
GCST90002400	SCUBE2	Combined	Plateletcrit	PMID:32888494	Vuckovic D	2020-09-01	408112			11_8845261_C_G	rs7123429	4.9e-29	0.0239407	0.019745	0.0281364				0.0338906	TRUE
GCST90002292	SCUBE2	Combined	Basophil count	PMID:32888493	Chen MH	2020-09-01	474001			11_8854482_A_G	rs2568054	1.59e-08	0.011612	0.00758812	0.0156359				0.0330463	TRUE
GCST90002379	SCUBE2	Combined	Basophil count	PMID:32888494	Vuckovic D	2020-09-01	408112			11_8868015_G_GA	rs11394263	4e-08	0.0121739	0.00782729	0.0165205				0.0329028	TRUE
GCST007069	SCUBE2	Combined	Red blood cell count	PMID:30595370	Kichaev G	2018-12-27	445000			11_8855305_C_T	rs2742552	8e-29							0.0327504	FALSE
NEALE2_30090_raw	SCUBE2	Combined	Platelet crit		UKB Neale v2	2018-08-01	350471	0		11_8868015_G_GA	rs11394263	4.95931e-20	0.00102296	0.000804202	0.00124172				0.0320814	TRUE
GCST004607	SCUBE2	Combined	Plateletcrit	PMID:27863252	Astle WJ	2016-11-17	164339			11_8797456_T_C	rs10769960	1e-15	-0.0299237	-0.0372614	-0.0225861				0.030233	TRUE
GCST90025947	SCUBE2	Combined	Serum alkaline phosphatase levels	PMID:34226706	Barton AR	2021-07-05	437896			11_8817832_G_A	rs34023999	8e-22	-0.0196658	-0.0237791	-0.0155525				0.0296412	TRUE
GCST90018971	SCUBE2	Combined	Red blood cell count	PMID:34594039	Sakaue S	2021-09-30	503987			11_8811812_C_T	rs10743091	4e-29	0.0211	0.0174081	0.0247919				0.0287159	FALSE
GCST90095129	SCUBE2	Combined	Vertex-wise sulcal depth	PMID:34910505	van der Meer D	2021-12-15	33748			11_8836830_T_C	rs2653606	1e-12	7.08	5.13388	9.02612				0.028502	FALSE
GCST008839	SCUBE2	Combined	Height	PMID:31562340	Akiyama M	2019-09-27	159095	32692		11_9515869_G_C	rs10770036	5e-22							0.0283692	FALSE
GCST003995	SCUBE2	Combined	Tonsillectomy	PMID:27182965	Pickrell JK	2016-05-16	173421		60098	11_8735309_G_A	rs11042055	7e-09							0.0280157	FALSE
GCST005014	SCUBE2	Combined	Tonsillectomy	PMID:28928442	Tian C	2017-09-19	173421		60098	11_8735309_G_A	rs11042055	7e-09				1.05	1.0328	1.06748	0.0280157	FALSE
GCST004601	SCUBE2	Combined	Red blood cell count	PMID:27863252	Astle WJ	2016-11-17	172952			11_8721318_TC_T	rs34723331	3.19e-13	-0.026736	-0.0339283	-0.0195437				0.0274399	TRUE
GCST90018739	SCUBE2	Combined	Height	PMID:34594039	Sakaue S	2021-09-30	165056			11_9515869_G_C	rs10770036	1e-16							0.0274331	FALSE
GCST90025988	SCUBE2	Combined	Red cell distribution width	PMID:34226706	Barton AR	2021-07-05	441263			11_8855305_C_T	rs2742552	1e-11	0.0130389	0.00918834	0.0168895				0.0270642	TRUE
GCST006624	SCUBE2	Combined	Systolic blood pressure	PMID:30224653	Evangelou E	2018-09-17	757601	249262		11_8753376_G_A	rs10743086	2e-09	-0.1832	-0.243067	-0.123333				0.0269766	FALSE
GCST007080	SCUBE2	Combined	Lung function (FEV1/FVC)	PMID:30595370	Kichaev G	2018-12-27	370000			11_8821043_C_T	rs7947553	3e-14							0.0261067	FALSE
GCST011353	SCUBE2	Combined	Serum alkaline phosphatase levels	PMID:33339817	Nielsen JB	2020-12-18	196874			11_8804524_G_A	rs78406497	2e-11							0.0257921	FALSE
GCST90018740	SCUBE2	Combined	Hematocrit	PMID:34594039	Sakaue S	2021-09-30	153015			11_8878847_C_T	rs2653559	2e-09	0.0189756	0.0127746	0.0251766				0.0257437	FALSE
GCST004628	SCUBE2	Combined	Immature fraction of reticulocytes	PMID:27863252	Astle WJ	2016-11-17	170548			11_8823106_T_TA	rs35762459	6.51e-13	-0.0256391	-0.0326289	-0.0186492				0.0255507	TRUE
GCST90018729	SCUBE2	Combined	Weight	PMID:34594039	Sakaue S	2021-09-30	165419			11_9515497_A_C	rs10770035	2e-13	0.0235124	0.0172414	0.0297834				0.0255223	FALSE
GCST90025951	SCUBE2	Combined	Platelet count	PMID:34226706	Barton AR	2021-07-05	444866			11_8817682_G_C	rs11042082	9e-49	-0.0259343	-0.0295793	-0.0222893				0.0254583	TRUE
GCST90025971	SCUBE2	Combined	Immature fraction of reticulocytes	PMID:34226706	Barton AR	2021-07-05	438154			11_8817682_G_C	rs11042082	4.8e-22	0.0187951	0.0148172	0.022773				0.0254583	TRUE
GCST90002383	SCUBE2	Combined	Hematocrit	PMID:32888494	Vuckovic D	2020-09-01	408112			11_8721318_TC_T	rs34723331	1.7e-35	-0.0273902	-0.031707	-0.0230734				0.0252331	TRUE
NEALE2_3144_raw	SCUBE2	Combined	Heel broadband ultrasound attenuation, direct entry		UKB Neale v2	2018-08-01	206576	0		11_8884324_G_T	rs11042107	1.32746e-09	-0.465634	-0.616128	-0.31514				0.0246833	TRUE
GCST006433	SCUBE2	Combined	Heel bone mineral density	PMID:30048462	Kim SK	2018-07-26	394929			11_8878847_C_T	rs2653559	2e-34							0.0246606	FALSE
GCST007066	SCUBE2	Combined	Heel bone mineral density	PMID:30595370	Kichaev G	2018-12-27	446000			11_8878847_C_T	rs2653559	1e-32							0.0246606	FALSE
NEALE2_30020_raw	SCUBE2	Combined	Haemoglobin concentration		UKB Neale v2	2018-08-01	350474	0		11_8844599_A_AAAT	rs76506961	3.74114e-25	0.0283691	0.0230028	0.0337354				0.0246337	TRUE
GCST90002304	SCUBE2	Combined	Hematocrit	PMID:32888493	Chen MH	2020-09-01	562259			11_8855051_G_T	rs56316046	3.37e-44	-0.027138	-0.0309502	-0.0233258				0.0244578	TRUE
GCST90002367	SCUBE2	Combined	Red blood cell count	PMID:32888493	Chen MH	2020-09-01	727624			11_8855051_G_T	rs56316046	3e-40							0.0244204	FALSE
GCST90002308	SCUBE2	Combined	Hematocrit	PMID:32888493	Chen MH	2020-09-01	737823			11_8855051_G_T	rs56316046	8e-48							0.0243791	FALSE
GCST90025950	SCUBE2	Combined	Monocyte count	PMID:34226706	Barton AR	2021-07-05	443529			11_8807621_A_G	rs2292049	2.3e-09	-0.0136651	-0.0180741	-0.00925614				0.0243139	TRUE
GCST007431	SCUBE2	Combined	Lung function (FEV1/FVC)	PMID:30804560	Shrine N	2019-02-25	321047	79005		11_8822809_T_C	rs10840132	1.09e-13	-0.0204	-0.025692	-0.015108				0.0242816	TRUE
GCST90002314	SCUBE2	Combined	Hemoglobin concentration	PMID:32888493	Chen MH	2020-09-01	746431			11_8855051_G_T	rs56316046	7e-50							0.0241665	FALSE
GCST90025977	SCUBE2	Combined	Neutrophil count	PMID:34226706	Barton AR	2021-07-05	443782			11_8807621_A_G	rs2292049	2.5e-09	-0.0125333	-0.0170568	-0.00800984				0.0241447	TRUE
GCST90002351	SCUBE2	Combined	Neutrophil count	PMID:32888493	Chen MH	2020-09-01	519288			11_8801946_C_T	rs7120300	2.1e-14	-0.016662	-0.0209309	-0.0123931				0.0241036	TRUE
GCST90025970	SCUBE2	Combined	High light scatter reticulocyte count	PMID:34226706	Barton AR	2021-07-05	437723			11_8817832_G_A	rs34023999	2.7e-28	-0.0226875	-0.0269543	-0.0184207				0.0239251	TRUE
GCST006288	SCUBE2	Combined	Heel bone mineral density	PMID:28869591	Kemp JP	2017-09-04	142487			11_8902325_CA_C	rs1177106981	2e-15	0.030958	0.0227824	0.0391336				0.023686	TRUE
GCST90018960	SCUBE2	Combined	Hematocrit	PMID:34594039	Sakaue S	2021-09-30	503490			11_8841297_T_G	rs11042097	8e-27	0.0196	0.0160172	0.0231828				0.0236825	FALSE
GCST90002374	SCUBE2	Combined	White blood cell count	PMID:32888493	Chen MH	2020-09-01	562243			11_8801946_C_T	rs7120300	8.97e-18	-0.017912	-0.0219986	-0.0138254				0.0234929	TRUE
GCST90002383	SCUBE2	Combined	Hematocrit	PMID:32888494	Vuckovic D	2020-09-01	408112			11_8844599_A_AAAT	rs76506961	2.7e-31	0.0291	0.0241986	0.0340014				0.0233795	TRUE
GCST90002384	SCUBE2	Combined	Hemoglobin	PMID:32888494	Vuckovic D	2020-09-01	408112			11_8844599_A_AAAT	rs76506961	7e-34	0.0303222	0.0254241	0.0352203				0.0231301	TRUE
GCST90002404	SCUBE2	Combined	Red cell distribution width	PMID:32888494	Vuckovic D	2020-09-01	408112			11_8862761_C_G	rs2742545	2.9e-08	0.011801	0.00763232	0.0159697				0.0230856	TRUE
NEALE2_30030_raw	SCUBE2	Combined	Haematocrit percentage		UKB Neale v2	2018-08-01	350475	0		11_8844599_A_AAAT	rs76506961	3.8788e-23	0.079987	0.0641636	0.0958104				0.0230317	TRUE
GCST90025972	SCUBE2	Combined	Reticulocyte count	PMID:34226706	Barton AR	2021-07-05	437291			11_8817832_G_A	rs34023999	2.3e-26	-0.022277	-0.0265691	-0.0179849				0.0224835	TRUE
NEALE2_30300_raw	SCUBE2	Combined	High light scatter reticulocyte count		UKB Neale v2	2018-08-01	344729	0		11_8802871_A_C	rs4929915	2.85e-13	-0.000204002	-0.000258764	-0.00014924				0.022327	TRUE
GCST007841	SCUBE2	Combined	Height	PMID:30595370	Kichaev G	2018-12-27	458000			11_8794157_A_G	rs4579928	3e-10							0.0223041	FALSE
GCST90018877	SCUBE2	Combined	Myocardial infarction	PMID:34594039	Sakaue S	2021-09-30	623029		35909	11_8811812_C_T	rs10743091	2e-09	0.0557	0.037498	0.073902				0.0221031	FALSE
GCST90002344	SCUBE2	Combined	Monocyte count	PMID:32888493	Chen MH	2020-09-01	639696			11_8801946_C_T	rs7120300	4e-14							0.0220635	FALSE
GCST90002355	SCUBE2	Combined	Neutrophil count	PMID:32888493	Chen MH	2020-09-01	627215			11_8801946_C_T	rs7120300	2e-15							0.0220635	FALSE
GCST90002378	SCUBE2	Combined	White blood cell count	PMID:32888493	Chen MH	2020-09-01	746667			11_8801946_C_T	rs7120300	4e-20							0.0220635	FALSE
GCST004615	SCUBE2	Combined	Hemoglobin concentration	PMID:27863252	Astle WJ	2016-11-17	172925			11_8840983_G_A	rs7945705	2.767e-17	-0.0303477	-0.037382	-0.0233135				0.0219795	TRUE
GCST90002403	SCUBE2	Combined	Red blood cell count	PMID:32888494	Vuckovic D	2020-09-01	408112			11_8844599_A_AAAT	rs76506961	4.7e-29	0.0275188	0.022698	0.0323396				0.0218899	TRUE
NEALE2_30030_raw	SCUBE2	Combined	Haematocrit percentage		UKB Neale v2	2018-08-01	350475	0		11_8715148_T_C	rs10840114	5.81257e-16	-0.0556532	-0.0691306	-0.0421758				0.0218252	TRUE
GCST006016	SCUBE2	Combined	Serum alkaline phosphatase levels	PMID:29403010	Kanai M	2018-02-05	105030			11_8804524_G_A	rs78406497	6e-12							0.0217921	FALSE
GCST90002357	SCUBE2	Combined	Platelet count	PMID:32888493	Chen MH	2020-09-01	542827			11_8823362_G_A	rs7947631	1.47e-49	-0.027075	-0.0306598	-0.0234902				0.0217918	TRUE
GCST90018722	SCUBE2	Combined	Serum alkaline phosphatase levels	PMID:34594039	Sakaue S	2021-09-30	118886			11_8804524_G_A	rs78406497	8e-13	0.0311916	0.0226545	0.0397287				0.0217736	FALSE
NEALE2_30070_raw	SCUBE2	Combined	Red blood cell (erythrocyte) distribution width		UKB Neale v2	2018-08-01	350473	0		11_8900430_CAA_C	rs34808505	8.8568e-11	0.0147348	0.0102817	0.0191879				0.0217658	TRUE
GCST90018978	SCUBE2	Combined	White blood cell count	PMID:34594039	Sakaue S	2021-09-30	504825			11_8811812_C_T	rs10743091	1e-14	0.0165	0.0123213	0.0206787				0.0216035	FALSE
GCST90002405	SCUBE2	Combined	Reticulocyte count	PMID:32888494	Vuckovic D	2020-09-01	408112			11_8807947_C_G	rs10840129	5.7e-22	0.0229225	0.0182595	0.0275855				0.0212737	TRUE
NEALE2_30010_raw	SCUBE2	Combined	Red blood cell (erythrocyte) count		UKB Neale v2	2018-08-01	350475	0		11_8844599_A_AAAT	rs76506961	6.91922e-25	0.0100868	0.00816784	0.0120058				0.0211431	TRUE
GCST90002403	SCUBE2	Combined	Red blood cell count	PMID:32888494	Vuckovic D	2020-09-01	408112			11_8721318_TC_T	rs34723331	1.1e-32	-0.025791	-0.030037	-0.021545				0.0210865	TRUE
GCST90002340	SCUBE2	Combined	Monocyte count	PMID:32888493	Chen MH	2020-09-01	521594			11_8801946_C_T	rs7120300	6.41e-16	-0.017176	-0.021339	-0.013013				0.020683	TRUE
GCST90002387	SCUBE2	Combined	Immature fraction of reticulocytes	PMID:32888494	Vuckovic D	2020-09-01	408112			11_8825494_C_A	rs10769966	6.9e-35	0.0270675	0.022762	0.031373				0.0205573	TRUE
GCST90018657	SCUBE2	Combined	Myocardial infarction	PMID:34594039	Sakaue S	2021-09-30	161206		14992	11_8811812_C_T	rs10743091	1e-08	0.0760706	0.0500532	0.102088				0.0205023	FALSE
GCST006979	SCUBE2	Combined	Heel bone mineral density	PMID:30598549	Morris JA	2018-12-31	426824			11_8878847_C_T	rs2653559	2.5e-26	-0.0285346	-0.033397	-0.0236722				0.0203832	TRUE
GCST004611	SCUBE2	Combined	High light scatter reticulocyte count	PMID:27863252	Astle WJ	2016-11-17	170761			11_8825494_C_A	rs10769966	2.703e-12	0.0251476	0.0180986	0.0321966				0.0201173	TRUE
GCST004619	SCUBE2	Combined	Reticulocyte fraction of red cells	PMID:27863252	Astle WJ	2016-11-17	170690			11_8824822_G_A	rs10840133	3.982e-12	0.0249874	0.0179282	0.0320466				0.0201173	TRUE
GCST90002346	SCUBE2	Combined	Mean platelet volume	PMID:32888493	Chen MH	2020-09-01	460935			11_8824556_T_G	rs12222526	1.34e-16	0.01636	0.0124851	0.0202349				0.0201123	TRUE
GCST90002369	SCUBE2	Combined	Red cell distribution width	PMID:32888493	Chen MH	2020-09-01	531774			11_8857558_C_T	rs2653613	1.6e-09	0.011329	0.00765204	0.015006				0.02008	TRUE
GCST90013406	SCUBE2	Combined	Liver enzyme levels (alkaline phosphatase)	PMID:33972514	Pazoki R	2021-05-10	437438	315572		11_8874536_T_C	rs11042106	3e-29	0.00349629	0.00288592	0.00410666				0.0200485	FALSE
GCST90002361	SCUBE2	Combined	Platelet count	PMID:32888493	Chen MH	2020-09-01	721201			11_8823362_G_A	rs7947631	5e-51							0.0200268	FALSE
GCST004603	SCUBE2	Combined	Platelet count	PMID:27863252	Astle WJ	2016-11-17	166066			11_8797456_T_C	rs10769960	6.702e-19	-0.0331283	-0.0404406	-0.025816				0.0200023	TRUE
NEALE2_30290_raw	SCUBE2	Combined	High light scatter reticulocyte percentage		UKB Neale v2	2018-08-01	344729	0		11_8825494_C_A	rs10769966	3.25139e-08	0.00451646	0.00291495	0.00611797				0.0199662	TRUE
GCST004612	SCUBE2	Combined	High light scatter reticulocyte percentage of red cells	PMID:27863252	Astle WJ	2016-11-17	170763			11_8825494_C_A	rs10769966	2e-15	0.0285191	0.0214699	0.0355682				0.0199515	TRUE
GCST90002395	SCUBE2	Combined	Mean platelet volume	PMID:32888494	Vuckovic D	2020-09-01	408112			11_8825494_C_A	rs10769966	1.2e-14	0.0158212	0.0118012	0.0198412				0.0199515	TRUE
NEALE2_30100_raw	SCUBE2	Combined	Mean platelet (thrombocyte) volume		UKB Neale v2	2018-08-01	350470	0		11_8823362_G_A	rs7947631	6e-15	0.0201075	0.0150587	0.0251563				0.0199515	TRUE
GCST90011900	SCUBE2	Combined	Serum alkaline phosphatase levels	PMID:33547301	Chen VL	2021-02-05	390964	105030		11_8896429_T_C	rs72632952	3e-23	9.93	7.97053	11.8895				0.0198634	FALSE
GCST90018942	SCUBE2	Combined	Serum alkaline phosphatase levels	PMID:34594039	Sakaue S	2021-09-30	463178			11_8872963_G_C	rs11042105	6e-29							0.0198439	FALSE
GCST90002386	SCUBE2	Combined	High light scatter reticulocyte percentage of red cells	PMID:32888494	Vuckovic D	2020-09-01	408112			11_8824822_G_A	rs10840133	5.7e-41	0.0286756	0.0244828	0.0328684				0.0198241	TRUE
GCST90018969	SCUBE2	Combined	Platelet count	PMID:34594039	Sakaue S	2021-09-30	499097			11_8823362_G_A	rs7947631	5e-34	-0.0239	-0.0277519	-0.0200481				0.0198241	FALSE
GCST90025969	SCUBE2	Combined	Hemoglobin levels	PMID:34226706	Barton AR	2021-07-05	445373			11_8855305_C_T	rs2742552	3e-32	0.0229176	0.0190391	0.0267961				0.0197592	TRUE
NEALE2_3148_raw	SCUBE2	Combined	Heel bone mineral density (bmd)		UKB Neale v2	2018-08-01	206496	0		11_8884324_G_T	rs11042107	4.55e-13	-0.00400236	-0.00508606	-0.00291866				0.0196474	TRUE
NEALE2_1309	SCUBE2	Combined	Fresh fruit intake		UKB Neale v2	2018-08-01	348284	0		11_8632981_T_C	rs10769936	2.50983e-08	-0.00863301	-0.0116694	-0.00559666				0.0194838	TRUE
NEALE2_1528	SCUBE2	Combined	Water intake		UKB Neale v2	2018-08-01	333363	0		11_9502197_A_C	rs7938998	1.246e-12	0.0146987	0.0106413	0.0187561				0.0194749	TRUE
GCST90002363	SCUBE2	Combined	Red blood cell count	PMID:32888493	Chen MH	2020-09-01	545203			11_8877981_A_G	rs2742540	9.24e-37	-0.023447	-0.027073	-0.019821				0.0194409	TRUE
NEALE2_30110_raw	SCUBE2	Combined	Platelet distribution width		UKB Neale v2	2018-08-01	350470	0		11_9627465_TGGG_T	rs1311564587	1.18986e-16	-0.0111277	-0.0137604	-0.00849505				0.0194404	TRUE
GCST90026597	SCUBE2	Combined	Age at menopause	PMID:34050765	Zhang L	2021-05-29	181219			11_9448245_C_G	rs1020622	8e-09							0.0192908	FALSE
GCST90002402	SCUBE2	Combined	Platelet count	PMID:32888494	Vuckovic D	2020-09-01	408112			11_8823362_G_A	rs7947631	5.4e-38	-0.0271745	-0.031308	-0.023041				0.0192355	TRUE
NEALE2_1697	SCUBE2	Combined	Comparative height size at age 10		UKB Neale v2	2018-08-01	355331	0		11_9443930_G_A	rs7949973	2.04249e-09	0.00972574	0.00654578	0.0129057				0.0191398	TRUE
GCST90025989	SCUBE2	Combined	Insulin-like growth factor 1 levels	PMID:34226706	Barton AR	2021-07-05	435516			11_9501020_T_C	rs2290425	3.7e-08	0.0106544	0.00674616	0.0145626				0.019121	TRUE
GCST90002385	SCUBE2	Combined	High light scatter reticulocyte count	PMID:32888494	Vuckovic D	2020-09-01	408112			11_8823362_G_A	rs7947631	5.8e-32	0.0251356	0.0209486	0.0293226				0.0190883	TRUE
GCST010083	SCUBE2	Combined	Hemoglobin levels	PMID:32327693	Oskarsson GR	2020-04-23	684122			11_8840983_G_A	rs7945705	2e-22	-0.021	-0.0252251	-0.0167749				0.0190302	FALSE
NEALE2_3147_raw	SCUBE2	Combined	Heel quantitative ultrasound index (qui), direct entry		UKB Neale v2	2018-08-01	206589	0		11_8878847_C_T	rs2653559	2.71e-13	-0.641378	-0.813387	-0.469369				0.019025	TRUE
NEALE2_78_raw	SCUBE2	Combined	Heel bone mineral density (bmd) t-score, automated		UKB Neale v2	2018-08-01	206589	0		11_8878847_C_T	rs2653559	2.71e-13	-0.0362105	-0.0459213	-0.0264997				0.019025	TRUE
GCST90002406	SCUBE2	Combined	Reticulocyte fraction of red cells	PMID:32888494	Vuckovic D	2020-09-01	408112			11_8823362_G_A	rs7947631	1.2e-27	0.023452	0.0192327	0.0276713				0.0190129	TRUE
NEALE2_30280_raw	SCUBE2	Combined	Immature reticulocyte fraction		UKB Neale v2	2018-08-01	344728	0		11_8825494_C_A	rs10769966	2.92994e-22	0.00141634	0.00113026	0.00170242				0.0190129	TRUE
GCST004604	SCUBE2	Combined	Hematocrit	PMID:27863252	Astle WJ	2016-11-17	173039			11_8877981_A_G	rs2742540	5.874e-16	-0.0285523	-0.0354681	-0.0216364				0.0186212	TRUE
GCST90002349	SCUBE2	Combined	Mean platelet volume	PMID:32888493	Chen MH	2020-09-01	484042			11_8824556_T_G	rs12222526	2e-13							0.0185215	FALSE
GCST90056183	SCUBE2	Combined	Platelet count	PMID:34469753	Kachuri L	2021-08-26	235256	100764		11_8824555_G_T	rs11042093	2e-22							0.0185215	FALSE
GCST012229	SCUBE2	Combined	Hip index	PMID:34021172	Christakoudi S	2021-05-21	186825			11_8743570_T_A	rs10840116	7e-09							0.0176211	FALSE
GCST007841	SCUBE2	Combined	Height	PMID:30595370	Kichaev G	2018-12-27	458000			11_9500590_T_C	rs1470895	1e-09							0.0176188	FALSE
GCST90026598	SCUBE2	Combined	Age at menopause	PMID:34050765	Zhang L	2021-05-29	225080			11_9448245_C_G	rs1020622	6e-14							0.0171157	FALSE
GCST90025949	SCUBE2	Combined	Height	PMID:34226706	Barton AR	2021-07-05	458235			11_9516357_G_C	rs10743108	2.4e-08	0.0305991	0.0196587	0.0415395				0.0160781	TRUE
GCST90025947	SCUBE2	Combined	Serum alkaline phosphatase levels	PMID:34226706	Barton AR	2021-07-05	437896			11_8907244_T_A	rs11042118	6.3e-34	0.0304965	0.0254456	0.0355474				0.0160332	TRUE
GCST90025982	SCUBE2	Combined	Heel bone mineral density T score	PMID:34226706	Barton AR	2021-07-05	445855			11_8907244_T_A	rs11042118	2e-29	-0.0275717	-0.0325246	-0.0226188				0.0160332	TRUE
GCST90018959	SCUBE2	Combined	Height	PMID:34594039	Sakaue S	2021-09-30	525444			11_9516357_G_C	rs10743108	9e-21							0.0156305	FALSE
NEALE2_30020_raw	SCUBE2	Combined	Haemoglobin concentration		UKB Neale v2	2018-08-01	350474	0		11_8715148_T_C	rs10840114	2.79351e-18	-0.0203351	-0.0249058	-0.0157644				0.0154997	TRUE
GCST010543	SCUBE2	Combined	Alcohol consumption (drinks per week) (MTAG)	PMID:32451486	Zhou H	2020-05-25	972915			11_8646535_C_T	rs61741649	8e-09	0.0205153	0.0135446	0.0274859				0.0152345	FALSE
NEALE2_30010_raw	SCUBE2	Combined	Red blood cell (erythrocyte) count		UKB Neale v2	2018-08-01	350475	0		11_8715148_T_C	rs10840114	6.2335e-17	-0.00697244	-0.0086069	-0.00533798				0.0133206	TRUE
NEALE2_23112_raw	SCUBE2	Combined	Leg fat mass (right)		UKB Neale v2	2018-08-01	354807	0		11_8617653_T_C	rs4929923	1.11193e-10	0.0249549	0.017373	0.0325368				0.013306	TRUE
NEALE2_23124_raw	SCUBE2	Combined	Arm fat mass (left)		UKB Neale v2	2018-08-01	354673	0		11_8617653_T_C	rs4929923	5.3248e-11	0.0111479	0.00781802	0.0144778				0.013306	TRUE
NEALE2_23120_raw	SCUBE2	Combined	Arm fat mass (right)		UKB Neale v2	2018-08-01	354736	0		11_8617653_T_C	rs4929923	9.375e-12	0.0103625	0.00738267	0.0133423				0.0132892	TRUE
NEALE2_23116_raw	SCUBE2	Combined	Leg fat mass (left)		UKB Neale v2	2018-08-01	354788	0		11_8617653_T_C	rs4929923	7.6428e-11	0.0245679	0.0171684	0.0319674				0.0130933	TRUE
NEALE2_23119_raw	SCUBE2	Combined	Arm fat percentage (right)		UKB Neale v2	2018-08-01	354760	0		11_8617653_T_C	rs4929923	1.036e-12	0.131382	0.0952449	0.167519				0.0128817	TRUE
GCST90002384	SCUBE2	Combined	Hemoglobin	PMID:32888494	Vuckovic D	2020-09-01	408112			11_8721318_TC_T	rs34723331	1.4e-38	-0.0285938	-0.032908	-0.0242796				0.0126663	TRUE
NEALE2_23123_raw	SCUBE2	Combined	Arm fat percentage (left)		UKB Neale v2	2018-08-01	354707	0		11_8617653_T_C	rs4929923	1.529e-11	0.12547	0.089012	0.161928				0.0126617	TRUE
GCST90026516	SCUBE2	Combined	White blood cell count (neutrophil)	PMID:34107879	Hu Y	2021-06-09	21347			11_9426066_T_A	rs114846224	1e-08							0.0125533	FALSE
NEALE2_23111_raw	SCUBE2	Combined	Leg fat percentage (right)		UKB Neale v2	2018-08-01	354811	0		11_8617653_T_C	rs4929923	4.9541e-11	0.0892925	0.0626643	0.115921				0.0125181	TRUE
GCST90018947	SCUBE2	Combined	Body mass index	PMID:34594039	Sakaue S	2021-09-30	523818			11_8614558_T_C	rs10769931	7e-19	0.0174	0.0135572	0.0212428				0.0124969	FALSE
GCST002541	SCUBE2	Combined	Menarche (age at onset)	PMID:25231870	Perry JR	2014-07-23	182413			11_8618447_G_C	rs4929947	3e-12							0.0124571	FALSE
GCST004559_4	SCUBE2	Combined	Body mass index in physically active individuals [EA]	PMID:28448500	Graff M	2017-04-27	123097	31959		11_8617653_T_C	rs4929923	1e-08	0.0245	0.0161206	0.0328794				0.0124344	FALSE
GCST010555	SCUBE2	Combined	Type 2 diabetes	PMID:32541925	Vujkovic M	2020-06-15	1114458		148726	11_8632981_T_C	rs10769936	6e-12	0.0349	0.0249571	0.0448429				0.0123931	FALSE
NEALE2_23099_raw	SCUBE2	Combined	Body fat percentage		UKB Neale v2	2018-08-01	354628	0		11_8669171_T_C	rs11042030	1.2849e-11	-0.113577	-0.146456	-0.0806976				0.0123309	TRUE
GCST005951	SCUBE2	Combined	Body mass index	PMID:26426971	Winkler TW	2015-10-01	309889			11_8647890_A_G	rs10840100	2e-15	0.0221901	0.0167134	0.0276669				0.0122911	FALSE
GCST90002401	SCUBE2	Combined	Platelet distribution width	PMID:32888494	Vuckovic D	2020-09-01	408112			11_9580735_C_T	rs4910482	1.9e-09	-0.0130987	-0.0173753	-0.0088221				0.012228	TRUE
GCST000880	SCUBE2	Combined	Menarche (age at onset)	PMID:21102462	Elks CE	2010-11-21	87802	14731		11_8617653_T_C	rs4929923	1e-08	-2.3	-3.08664	-1.51336				0.0122228	FALSE
GCST004559	SCUBE2	Combined	Body mass index in physically active individuals	PMID:28448500	Graff M	2017-04-27	123097	31959		11_8617653_T_C	rs4929923	2e-08	0.0229	0.0149021	0.0308979				0.0122228	FALSE
GCST004557_3	SCUBE2	Combined	Body mass index [EA, women]	PMID:28448500	Graff M	2017-04-27	160403	44060		11_8617653_T_C	rs4929923	2e-09	0.0301	0.0202637	0.0399363				0.0122124	FALSE
GCST004557_6	SCUBE2	Combined	Body mass index [women]	PMID:28448500	Graff M	2017-04-27	160403	44060		11_8617653_T_C	rs4929923	1e-09	0.0285	0.0193567	0.0376433				0.0122124	FALSE
GCST004558	SCUBE2	Combined	Body mass index (joint analysis main effects and physical activity interaction)	PMID:28448500	Graff M	2017-04-27	160403	44060		11_8617653_T_C	rs4929923	1e-09							0.0122124	FALSE
GCST004558_6	SCUBE2	Combined	Body mass index (joint analysis main effects and physical activity interaction) [women]	PMID:28448500	Graff M	2017-04-27	160403	44060		11_8617653_T_C	rs4929923	8e-09							0.0122124	FALSE
GCST004064_4	SCUBE2	Combined	Waist-hip ratio [EA]	PMID:25673412	Shungin D	2015-02-12	142762	80837		11_8636938_A_G	rs4929927	8e-09	0.0198	0.0130724	0.0265276				0.012176	FALSE
GCST007461	SCUBE2	Combined	Alcohol consumption (drinks per week)	PMID:30643251	Liu M	2019-01-14	941280			11_8620671_C_T	rs7950166	1e-10	-0.0097992	-0.0127691	-0.00682927				0.0121423	FALSE
GCST007472	SCUBE2	Combined	Alcohol consumption (drinks per week) (MTAG)	PMID:30643251	Liu M	2019-01-14	1039210			11_8620671_C_T	rs7950166	1e-10	-0.00880867	-0.0114784	-0.00613894				0.0121423	FALSE
GCST004557	SCUBE2	Combined	Body mass index	PMID:28448500	Graff M	2017-04-27	160403	44060		11_8617653_T_C	rs4929923	2e-10	0.0229	0.0158443	0.0299557				0.0121319	FALSE
GCST004557_4	SCUBE2	Combined	Body mass index [EA]	PMID:28448500	Graff M	2017-04-27	160403	44060		11_8617653_T_C	rs4929923	9e-11	0.0249	0.0173718	0.0324282				0.0121319	FALSE
GCST008744	SCUBE2	Combined	Predicted visceral adipose tissue	PMID:31501611	Karlsson T	2019-09-09	325153			11_8617653_T_C	rs4929923	4e-12	0.0179758	0.012897	0.0230546				0.0121319	FALSE
GCST90025949	SCUBE2	Combined	Height	PMID:34226706	Barton AR	2021-07-05	458235			11_8730342_C_G	rs3794153	5.8e-10	0.00953299	0.00639795	0.012668				0.0121315	TRUE
NEALE2_23127_raw	SCUBE2	Combined	Trunk fat percentage		UKB Neale v2	2018-08-01	354619	0		11_8669171_T_C	rs11042030	7.5596e-11	-0.124745	-0.162306	-0.0871836				0.0121224	TRUE
NEALE2_21001_raw	SCUBE2	Combined	Body mass index (bmi)		UKB Neale v2	2018-08-01	359983	0		11_8617653_T_C	rs4929923	6.394e-12	0.0800091	0.0571853	0.102833				0.0120877	TRUE
NEALE2_2714	SCUBE2	Combined	Age when periods started (menarche)		UKB Neale v2	2018-08-01	188644	0		11_8667789_C_T	rs7126235	8.13875e-16	0.0203002	0.0153593	0.0252411				0.0120545	TRUE
GCST002783	SCUBE2	Combined	Body mass index	PMID:25673413	Locke AE	2015-02-12	238944	102754		11_8647890_A_G	rs10840100	6.666e-12	0.0206	0.01472	0.02648				0.0120115	TRUE
NEALE2_23104_raw	SCUBE2	Combined	Body mass index (bmi)		UKB Neale v2	2018-08-01	354831	0		11_8617653_T_C	rs4929923	4.753e-12	0.0808112	0.0578994	0.103723				0.0119787	TRUE
NEALE2_23128_raw	SCUBE2	Combined	Trunk fat mass		UKB Neale v2	2018-08-01	354597	0		11_8673283_G_A	rs10128597	1.3803e-11	-0.0929214	-0.119862	-0.0659804				0.0119335	TRUE
NEALE2_23098_raw	SCUBE2	Combined	Weight		UKB Neale v2	2018-08-01	354838	0		11_8673283_G_A	rs10128597	2.2676e-11	-0.2513	-0.324948	-0.177652				0.0119005	TRUE
NEALE2_48_raw	SCUBE2	Combined	Waist circumference		UKB Neale v2	2018-08-01	360564	0		11_8673283_G_A	rs10128597	4.6734e-11	-0.207827	-0.269722	-0.145932				0.0119005	TRUE
NEALE2_23105_raw	SCUBE2	Combined	Basal metabolic rate		UKB Neale v2	2018-08-01	354825	0		11_8673283_G_A	rs10128597	1.03326e-08	-12.8084	-17.1932	-8.42359				0.0118956	TRUE
GCST007068	SCUBE2	Combined	Mean corpuscular hemoglobin	PMID:30595370	Kichaev G	2018-12-27	443000			11_8640969_T_C	rs11042023	2e-09							0.0118951	FALSE
GCST006368	SCUBE2	Combined	Body mass index	PMID:30108127	Hoffmann TJ	2018-08-14	334487	458721		11_8647890_A_G	rs10840100	5e-12	0.018	0.0128911	0.0231089				0.0118717	FALSE
NEALE2_21002_raw	SCUBE2	Combined	Weight		UKB Neale v2	2018-08-01	360116	0		11_8673283_G_A	rs10128597	1.626e-11	-0.252084	-0.32543	-0.178738				0.0118221	TRUE
GCST004904	SCUBE2	Combined	Body mass index	PMID:28892062	Akiyama M	2017-09-11	158284	337300		11_8646133_T_C	rs10840099	1e-17	0.02	0.015428	0.024572				0.0117833	FALSE
GCST90018926	SCUBE2	Combined	Type 2 diabetes	PMID:34594039	Sakaue S	2021-09-30	667504		84224	11_8654691_C_T	rs10840102	2e-09	-0.0407	-0.0540002	-0.0273998				0.0117691	FALSE
GCST001953_4	SCUBE2	Combined	Obesity [Obesity class I]	PMID:23563607	Berndt SI	2013-04-07	204498	133637		11_8640969_T_C	rs11042023	1e-11				1.07	1.04935	1.09105	0.0117129	FALSE
GCST004065_3	SCUBE2	Combined	Waist circumference [EA]	PMID:25673412	Shungin D	2015-02-12	142762	80837		11_8647890_A_G	rs10840100	5e-09	0.0203	0.0134953	0.0271047				0.0116996	FALSE
GCST90038594	SCUBE2	Combined	Metabolic biomarkers (multivariate analysis)	PMID:33980691	Martin S	2021-05-12	389354			11_8669171_T_C	rs11042030	2e-09							0.0116968	FALSE
NEALE2_23100_raw	SCUBE2	Combined	Whole body fat mass		UKB Neale v2	2018-08-01	354244	0		11_8673283_G_A	rs10128597	1.7886e-11	-0.165751	-0.214077	-0.117425				0.0116593	TRUE
GCST010557	SCUBE2	Combined	Type 2 diabetes	PMID:32541925	Vujkovic M	2020-06-15	1407282		228499	11_8655516_C_A	rs7941510	2e-17	-0.0353	-0.0434457	-0.0271543				0.0114787	FALSE
GCST90000059	SCUBE2	Combined	Diastolic blood pressure	PMID:33230300	Surendran P	2020-11-23	810865	354096		11_8730093_G_C	rs3812762	1.933e-11	0.0114193	0.00808419	0.0147544				0.0113731	TRUE
GCST007069	SCUBE2	Combined	Red blood cell count	PMID:30595370	Kichaev G	2018-12-27	445000			11_8607543_G_T	rs57434655	3e-10							0.0112058	FALSE
GCST90020232	SCUBE2	Combined	Body fat percentage	PMID:33980691	Martin S	2021-05-12	442278			11_8669171_T_C	rs11042030	6e-17	-0.014	-0.0172802	-0.0107198				0.0110997	FALSE
GCST010136	SCUBE2	Combined	Fruit consumption	PMID:32066663	Niarchou M	2020-02-03	335576			11_8666469_C_T	rs7113874	9e-09							0.011066	FALSE
GCST90018949	SCUBE2	Combined	Weight	PMID:34594039	Sakaue S	2021-09-30	525535			11_8673283_G_A	rs10128597	2e-16	-0.0148	-0.0183281	-0.0112719				0.0110595	FALSE
GCST010148	SCUBE2	Combined	Cutaneous squamous cell carcinoma	PMID:32041948	Sarin KY	2020-02-10	699198		19149	11_9568842_C_T	rs7939541	9e-12	-0.08	-0.102986	-0.0570144				0.0109413	FALSE
GCST004558_3	SCUBE2	Combined	Body mass index (joint analysis main effects and physical activity interaction) [EA, women]	PMID:28448500	Graff M	2017-04-27	160403	44060		11_8666469_C_T	rs7113874	1e-08							0.0109172	FALSE
GCST004558_4	SCUBE2	Combined	Body mass index (joint analysis main effects and physical activity interaction) [EA]	PMID:28448500	Graff M	2017-04-27	160403	44060		11_8666469_C_T	rs7113874	2e-10							0.0108452	FALSE
NEALE2_21021_raw	SCUBE2	Combined	Pulse wave arterial stiffness index		UKB Neale v2	2018-08-01	118469	0		11_9450294_A_T	rs138827429	6.23361e-09	0.404791	0.268254	0.541328				0.0106176	TRUE
NEALE2_1210	SCUBE2	Combined	Snoring		UKB Neale v2	2018-08-01	336320	0	125656	11_8557534_T_A	rs11041980	5.09425e-10				1.03134	1.02135	1.04142	0.0106	TRUE
GCST90018970	SCUBE2	Combined	Pulse pressure	PMID:34594039	Sakaue S	2021-09-30	506308			11_8615644_G_C	rs1128559	4e-08							0.0105043	FALSE
GCST90018972	SCUBE2	Combined	Systolic blood pressure	PMID:34594039	Sakaue S	2021-09-30	485664			11_8615644_G_C	rs1128559	5e-08							0.0105043	FALSE
GCST90025989	SCUBE2	Combined	Insulin-like growth factor 1 levels	PMID:34226706	Barton AR	2021-07-05	435516			11_8583046_T_C	rs4929949	1.4e-12	0.013659	0.00979929	0.0175187				0.0104788	TRUE
GCST007039	SCUBE2	Combined	Body mass index	PMID:30595370	Kichaev G	2018-12-27	458000			11_8617653_T_C	rs4929923	2e-18							0.0104323	FALSE
GCST009001	SCUBE2	Combined	Body mass index	PMID:30239722	Pulit SL	2018-09-14	374756			11_8617653_T_C	rs4929923	3e-28	0.0186	0.0152924	0.0219076				0.0104323	FALSE
GCST009003	SCUBE2	Combined	Body mass index	PMID:30239722	Pulit SL	2018-09-14	434794			11_8617653_T_C	rs4929923	3e-28	0.0186	0.0152924	0.0219076				0.0104323	FALSE
GCST009871	SCUBE2	Combined	Body mass index	PMID:31669095	Zhu Z	2019-10-24	457822			11_8617653_T_C	rs4929923	9e-19							0.0104323	FALSE
GCST000830	SCUBE2	Combined	Body mass index	PMID:20935630	Speliotes EK	2010-10-10	123865	125931		11_8583046_T_C	rs4929949	3e-09	0.06	0.040174	0.079826				0.0104194	FALSE
GCST010544	SCUBE2	Combined	Problematic alcohol use (MTAG)	PMID:32451486	Zhou H	2020-05-25	972915			11_8596003_C_T	rs4244804	4e-08	-0.0113219	-0.0153633	-0.00728045				0.0103141	FALSE
GCST90025994	SCUBE2	Combined	Body mass index	PMID:34226706	Barton AR	2021-07-05	457756			11_8617653_T_C	rs4929923	1e-18	0.0175871	0.0136584	0.0215158				0.0103123	TRUE
GCST008997	SCUBE2	Combined	Waist-hip ratio	PMID:30239722	Pulit SL	2018-09-14	381152			11_8636938_A_G	rs4929927	3e-18	0.0153	0.0118576	0.0187424				0.0102236	FALSE
GCST008129	SCUBE2	Combined	Body mass index	PMID:29273807	Turcot V	2017-12-22	526508	196766		11_8640969_T_C	rs11042023	1e-16	0.0157	0.0119947	0.0194053				0.0100741	FALSE
GCST009004	SCUBE2	Combined	Body mass index	PMID:30239722	Pulit SL	2018-09-14	806834			11_8652392_C_G	rs4256980	9e-29							0.0100741	FALSE
GCST008996	SCUBE2	Combined	Waist-hip ratio	PMID:30239722	Pulit SL	2018-09-14	697734			11_8672526_G_C	rs12575252	2e-18							0.00957364	FALSE
GCST007087	SCUBE2	Combined	Systolic blood pressure	PMID:30595370	Kichaev G	2018-12-27	422000			11_8717296_T_C	rs871677	2e-08							0.008968	FALSE
GCST90025947	RAP1GAP	Female	Serum alkaline phosphatase levels	PMID:34226706	Barton AR	2021-07-05	437896			1_21626391_G_A	rs1130564	0	-0.186622	-0.194442	-0.178802				0.818395	TRUE
GCST90025947	RAP1GAP	Female	Serum alkaline phosphatase levels	PMID:34226706	Barton AR	2021-07-05	437896			1_21602767_A_G	rs829368	5.5e-172	-0.0860319	-0.0921842	-0.0798796				0.813618	TRUE
GCST90025947	RAP1GAP	Female	Serum alkaline phosphatase levels	PMID:34226706	Barton AR	2021-07-05	437896			1_21626533_A_C	rs12039278	8.2e-253	-0.0949201	-0.100705	-0.089135				0.81254	TRUE
GCST90025982	RAP1GAP	Female	Heel bone mineral density T score	PMID:34226706	Barton AR	2021-07-05	445855			1_21606132_G_A	rs2275365	2.1e-20	-0.0268842	-0.0327669	-0.0210015				0.805891	TRUE
GCST90025947	RAP1GAP	Female	Serum alkaline phosphatase levels	PMID:34226706	Barton AR	2021-07-05	437896			1_21608974_G_A	rs12130950	1.5e-107	0.0604276	0.0550212	0.065834				0.794941	TRUE
GCST90025948	RAP1GAP	Female	Serum phosphate levels	PMID:34226706	Barton AR	2021-07-05	400159			1_21608200_T_C	rs72660316	5.8e-40	0.0408658	0.034699	0.0470326				0.794941	TRUE
GCST90025982	RAP1GAP	Female	Heel bone mineral density T score	PMID:34226706	Barton AR	2021-07-05	445855			1_21608200_T_C	rs72660316	4e-13	-0.0192607	-0.0245976	-0.0139238				0.794941	TRUE
GCST90025948	RAP1GAP	Female	Serum phosphate levels	PMID:34226706	Barton AR	2021-07-05	400159			1_21662350_G_A	rs861213	8.9e-82	-0.0468528	-0.0518708	-0.0418348				0.789844	TRUE
GCST90025971	RAP1GAP	Female	Immature fraction of reticulocytes	PMID:34226706	Barton AR	2021-07-05	438154			1_21662350_G_A	rs861213	8.1e-108	0.0521344	0.0474164	0.0568524				0.789844	TRUE
GCST009091_2	RAP1GAP	Female	Abdominal aortic calcification levels [EA]	PMID:31659325	Malhotra R	2019-10-28	9417	2091		1_21648341_C_T	rs4654975	3e-08	-5.55	-7.51303	-3.58697				0.789137	FALSE
GCST90025947	RAP1GAP	Female	Serum alkaline phosphatase levels	PMID:34226706	Barton AR	2021-07-05	437896			1_21662350_G_A	rs861213	7e-17	0.0144233	0.0100886	0.018758				0.782369	TRUE
GCST90025947	RAP1GAP	Female	Serum alkaline phosphatase levels	PMID:34226706	Barton AR	2021-07-05	437896			1_21598584_C_T	rs61775975	1.8e-84	0.113083	0.102428	0.123738				0.775633	TRUE
GCST90025970	RAP1GAP	Female	High light scatter reticulocyte count	PMID:34226706	Barton AR	2021-07-05	437723			1_21662350_G_A	rs861213	1e-53	0.0353454	0.0307706	0.0399202				0.7748	TRUE
GCST006979	RAP1GAP	Female	Heel bone mineral density	PMID:30598549	Morris JA	2018-12-31	426824			1_21625531_C_T	rs1318236	4.7e-26	-0.0212927	-0.0248925	-0.0176929				0.772238	TRUE
GCST006433	RAP1GAP	Female	Heel bone mineral density	PMID:30048462	Kim SK	2018-07-26	394929			1_21625531_C_T	rs1318236	3e-27							0.769589	FALSE
GCST007066	RAP1GAP	Female	Heel bone mineral density	PMID:30595370	Kichaev G	2018-12-27	446000			1_21625531_C_T	rs1318236	3e-31							0.769589	FALSE
GCST006016_3	RAP1GAP	Female	Serum alkaline phosphatase levels [conditional on round 5]	PMID:29403010	Kanai M	2018-02-05	105030			1_21628472_C_T	rs77972946	2e-17							0.767427	FALSE
GCST004628	RAP1GAP	Female	Immature fraction of reticulocytes	PMID:27863252	Astle WJ	2016-11-17	170548			1_21664742_G_C	rs829375	2.526e-52	0.0639589	0.0557235	0.0721943				0.736002	TRUE
GCST90002385	RAP1GAP	Female	High light scatter reticulocyte count	PMID:32888494	Vuckovic D	2020-09-01	408112			1_21677300_T_C	rs829396	2.2e-61	0.0419657	0.0369898	0.0469416				0.728831	TRUE
GCST90002386	RAP1GAP	Female	High light scatter reticulocyte percentage of red cells	PMID:32888494	Vuckovic D	2020-09-01	408112			1_21677300_T_C	rs829396	1.5e-63	0.042779	0.0377962	0.0477618				0.728831	TRUE
GCST004612	RAP1GAP	Female	High light scatter reticulocyte percentage of red cells	PMID:27863252	Astle WJ	2016-11-17	170763			1_21677300_T_C	rs829396	4.538e-24	0.0434932	0.035069	0.0519174				0.72383	TRUE
GCST004611	RAP1GAP	Female	High light scatter reticulocyte count	PMID:27863252	Astle WJ	2016-11-17	170761			1_21673636_G_C	rs829402	5.061e-23	0.0422906	0.0339013	0.0506799				0.713937	TRUE
NEALE2_30280_raw	RAP1GAP	Female	Immature reticulocyte fraction		UKB Neale v2	2018-08-01	344728	0		1_21677300_T_C	rs829396	1.93205e-84	0.00338815	0.00304718	0.00372912				0.709368	TRUE
GCST90002387	RAP1GAP	Female	Immature fraction of reticulocytes	PMID:32888494	Vuckovic D	2020-09-01	408112			1_21677300_T_C	rs829396	3.4e-126	0.0623859	0.0572687	0.0675031				0.653336	TRUE
NEALE2_4123_raw	RAP1GAP	Female	Heel quantitative ultrasound index (qui), direct entry (right)		UKB Neale v2	2018-08-01	114614	0		1_21616643_C_T	rs829417	1.3185e-09	-0.565737	-0.748545	-0.382929				0.650012	TRUE
NEALE2_4125_raw	RAP1GAP	Female	Heel bone mineral density (bmd) t-score, automated (right)		UKB Neale v2	2018-08-01	114614	0		1_21616643_C_T	rs829417	1.31675e-09	-0.03194	-0.0422605	-0.0216195				0.650012	TRUE
NEALE2_4124_raw	RAP1GAP	Female	Heel bone mineral density (bmd) (right)		UKB Neale v2	2018-08-01	114552	0		1_21616643_C_T	rs829417	1.00808e-09	-0.00358507	-0.00473536	-0.00243478				0.646006	TRUE
GCST90038686	RAP1GAP	Female	Osteoarthritis	PMID:33959723	Donertas HM	2021-04-08	484598		39515	1_21596400_CG_C	rs929714585	1.7e-08				1.00373	1.00243	1.00502	0.62793	TRUE
GCST90002396	RAP1GAP	Female	Mean reticulocyte volume	PMID:32888494	Vuckovic D	2020-09-01	408112			1_21687978_G_T	rs17423390	2.3e-13	0.0156436	0.0114623	0.0198249				0.552193	TRUE
NEALE2_30300_raw	RAP1GAP	Female	High light scatter reticulocyte count		UKB Neale v2	2018-08-01	344729	0		1_21677300_T_C	rs829396	2.16567e-25	0.00030553	0.000248025	0.000363035				0.488935	TRUE
GCST90018943	RAP1GAP	Female	Alanine aminotransferase levels	PMID:34594039	Sakaue S	2021-09-30	494681			1_21688867_A_C	rs4654764	2e-08	0.0167	0.0108675	0.0225325				0.449704	FALSE
NEALE2_4120_raw	RAP1GAP	Female	Heel broadband ultrasound attenuation (right)		UKB Neale v2	2018-08-01	114609	0		1_21625531_C_T	rs1318236	2.34121e-09	-0.460315	-0.611373	-0.309257				0.441231	TRUE
NEALE2_30280_raw	RAP1GAP	Female	Immature reticulocyte fraction		UKB Neale v2	2018-08-01	344728	0		1_21687278_G_A	rs10493008	1.12373e-99	0.00311405	0.00282614	0.00340196				0.432427	TRUE
GCST90002387	RAP1GAP	Female	Immature fraction of reticulocytes	PMID:32888494	Vuckovic D	2020-09-01	408112			1_21676061_T_C	rs11580434	5.7e-50	0.0832202	0.0722461	0.0941943				0.427173	TRUE
NEALE2_3144_raw	RAP1GAP	Female	Heel broadband ultrasound attenuation, direct entry		UKB Neale v2	2018-08-01	206576	0		1_21672345_C_T	rs12036106	9.9403e-11	-0.53425	-0.696139	-0.372361				0.423428	TRUE
NEALE2_30260_raw	RAP1GAP	Female	Mean reticulocyte volume		UKB Neale v2	2018-08-01	344728	0		1_21687278_G_A	rs10493008	3.8856e-11	0.124264	0.0874093	0.161119				0.415987	TRUE
GCST004628	RAP1GAP	Female	Immature fraction of reticulocytes	PMID:27863252	Astle WJ	2016-11-17	170548			1_21687978_G_T	rs17423390	8.148e-62	0.0596002	0.0525591	0.0666413				0.415209	TRUE
GCST90002387	RAP1GAP	Female	Immature fraction of reticulocytes	PMID:32888494	Vuckovic D	2020-09-01	408112			1_21687978_G_T	rs17423390	2.6e-164	0.0601764	0.0558589	0.0644939				0.410834	TRUE
GCST004611	RAP1GAP	Female	High light scatter reticulocyte count	PMID:27863252	Astle WJ	2016-11-17	170761			1_21687978_G_T	rs17423390	6.833e-28	0.0396974	0.0325901	0.0468047				0.410818	TRUE
GCST004612	RAP1GAP	Female	High light scatter reticulocyte percentage of red cells	PMID:27863252	Astle WJ	2016-11-17	170763			1_21687978_G_T	rs17423390	1.542e-28	0.0401836	0.0330763	0.0472909				0.409898	TRUE
GCST90002385	RAP1GAP	Female	High light scatter reticulocyte count	PMID:32888494	Vuckovic D	2020-09-01	408112			1_21687978_G_T	rs17423390	8.1e-83	0.0412904	0.0370926	0.0454882				0.409598	TRUE
GCST90002386	RAP1GAP	Female	High light scatter reticulocyte percentage of red cells	PMID:32888494	Vuckovic D	2020-09-01	408112			1_21687978_G_T	rs17423390	1.4e-85	0.0420514	0.0378476	0.0462552				0.409598	TRUE
GCST90002405	RAP1GAP	Female	Reticulocyte count	PMID:32888494	Vuckovic D	2020-09-01	408112			1_21687978_G_T	rs17423390	1.5e-25	0.0224963	0.0182771	0.0267155				0.409598	TRUE
GCST90002406	RAP1GAP	Female	Reticulocyte fraction of red cells	PMID:32888494	Vuckovic D	2020-09-01	408112			1_21687978_G_T	rs17423390	2.7e-27	0.02336	0.01913	0.02759				0.409598	TRUE
NEALE2_30290_raw	RAP1GAP	Female	High light scatter reticulocyte percentage		UKB Neale v2	2018-08-01	344729	0		1_21687978_G_T	rs17423390	1.87e-12	0.005795	0.00418255	0.00740745				0.409197	TRUE
NEALE2_30300_raw	RAP1GAP	Female	High light scatter reticulocyte count		UKB Neale v2	2018-08-01	344729	0		1_21687978_G_T	rs17423390	6.00402e-31	0.000286611	0.000238053	0.000335169				0.409197	TRUE
GCST90025989	RAP1GAP	Female	Insulin-like growth factor 1 levels	PMID:34226706	Barton AR	2021-07-05	435516			1_21687278_G_A	rs10493008	9.3e-12	-0.0136153	-0.017497	-0.00973356				0.40062	TRUE
GCST90025970	RAP1GAP	Female	High light scatter reticulocyte count	PMID:34226706	Barton AR	2021-07-05	437723			1_21687278_G_A	rs10493008	3.7e-86	0.0384812	0.0346157	0.0423467				0.400495	TRUE
GCST90025971	RAP1GAP	Female	Immature fraction of reticulocytes	PMID:34226706	Barton AR	2021-07-05	438154			1_21687278_G_A	rs10493008	2.4e-166	0.0546432	0.0506565	0.0586299				0.400495	TRUE
GCST90025972	RAP1GAP	Female	Reticulocyte count	PMID:34226706	Barton AR	2021-07-05	437291			1_21687278_G_A	rs10493008	3.5e-25	0.0207528	0.0168669	0.0246387				0.400495	TRUE
GCST90025975	RAP1GAP	Female	Mean reticulocyte volume	PMID:34226706	Barton AR	2021-07-05	436944			1_21687278_G_A	rs10493008	4.1e-18	0.0153703	0.01154	0.0192006				0.400495	TRUE
GCST011520	RAP1GAP	Female	Insulin-like growth factor 1 levels	PMID:33587031	Sinnott-Armstrong N	2021-02-15	317114			1_21695683_T_G	rs6701954	2e-08	-0.00371966	-0.00501876	-0.00242056				0.39904	FALSE
NEALE2_1110	RAP1GAP	Female	Length of mobile phone use		UKB Neale v2	2018-08-01	356618	0		1_21718564_C_CT	rs5772963	2.21649e-08	0.0178326	0.0115849	0.0240803				0.383952	TRUE
GCST90025948	RAP1GAP	Female	Serum phosphate levels	PMID:34226706	Barton AR	2021-07-05	400159			1_21600005_G_A	rs1767444	1.6e-38	-0.0262025	-0.0305544	-0.0218506				0.353388	TRUE
GCST90025948	RAP1GAP	Female	Serum phosphate levels	PMID:34226706	Barton AR	2021-07-05	400159			1_21378818_A_G	rs4463635	6.8e-11	-0.025149	-0.0334199	-0.0168781				0.283	TRUE
GCST90025947	RAP1GAP	Female	Serum alkaline phosphatase levels	PMID:34226706	Barton AR	2021-07-05	437896			1_21697384_C_T	rs116254572	1.7e-43	0.0886181	0.0751679	0.102068				0.279821	TRUE
NEALE2_3148_raw	RAP1GAP	Female	Heel bone mineral density (bmd)		UKB Neale v2	2018-08-01	206496	0		1_21672345_C_T	rs12036106	1.761e-12	-0.00419464	-0.00536038	-0.0030289				0.250188	TRUE
NEALE2_3147_raw	RAP1GAP	Female	Heel quantitative ultrasound index (qui), direct entry		UKB Neale v2	2018-08-01	206589	0		1_22158082_T_C	rs3971300	7.43722e-28	-0.804753	-0.948913	-0.660593				0.222104	TRUE
NEALE2_78_raw	RAP1GAP	Female	Heel bone mineral density (bmd) t-score, automated		UKB Neale v2	2018-08-01	206589	0		1_22158082_T_C	rs3971300	7.42152e-28	-0.0454334	-0.053572	-0.0372948				0.222104	TRUE
GCST90025948	RAP1GAP	Female	Serum phosphate levels	PMID:34226706	Barton AR	2021-07-05	400159			1_21602767_A_G	rs829368	2.4e-12	0.0271019	0.0199806	0.0342232				0.210547	TRUE
GCST006016	RAP1GAP	Female	Serum alkaline phosphatase levels	PMID:29403010	Kanai M	2018-02-05	105030			1_21579111_C_T	rs36053309	4e-130							0.201139	FALSE
GCST90025947	RAP1GAP	Female	Serum alkaline phosphatase levels	PMID:34226706	Barton AR	2021-07-05	437896			1_21580111_C_T	rs72659192	0	0.147535	0.143141	0.151929				0.181692	TRUE
GCST90026144	RAP1GAP	Female	Cys-gly, oxidized levels	PMID:33437055	Panyard DJ	2021-01-12	291			1_21506131_C_T	rs142284739	4.7e-08	-0.2201	-0.299088	-0.141112				0.165807	TRUE
GCST90019464	RAP1GAP	Female	von Willebrand factor A domain-containing protein 1 measurement	PMID:33328453	Pietzner M	2020-12-16	10708			1_21855622_G_A	rs2229474	1.457e-10	0.4021	0.279208	0.524992				0.1615	TRUE
GCST000583_3	RAP1GAP	Female	Hematological and biochemical traits [ALP]	PMID:20139978	Kamatani Y	2010-02-07	14402			1_21578036_C_T	rs2242420	5e-13	0.163	0.118783	0.207217				0.155339	FALSE
GCST90025947	RAP1GAP	Female	Serum alkaline phosphatase levels	PMID:34226706	Barton AR	2021-07-05	437896			1_21577615_G_T	rs3200256	2.7e-23	-0.0931294	-0.110043	-0.0762156				0.153167	TRUE
GCST006799	RAP1GAP	Female	Pyridoxal 5'-phosphate levels	PMID:25972531	Carter TC	2015-05-13	2158			1_21577881_A_C	rs1772719	2e-16							0.152584	FALSE
GCST009733_197	RAP1GAP	Female	Urinary metabolite levels in chronic kidney disease [phosphoethanolamine]	PMID:31959995	Schlosser P	2020-01-20	1221	406	1221	1_21577881_A_C	rs1772719	7e-13	-0.303	-0.38572	-0.22028				0.152584	FALSE
GCST90025947	RAP1GAP	Female	Serum alkaline phosphatase levels	PMID:34226706	Barton AR	2021-07-05	437896			1_21574096_C_T	rs2275367	0	-0.13934	-0.145317	-0.133363				0.130283	TRUE
GCST90025948	RAP1GAP	Female	Serum phosphate levels	PMID:34226706	Barton AR	2021-07-05	400159			1_21534527_T_G	rs6668129	1.6e-12	0.0129636	0.00877457	0.0171526				0.104043	TRUE
SAIGE_594_1	RAP1GAP	Female	Calculus of kidney		UKB SAIGE	2018-10-24	404196	0	3191	1_21577881_A_C	rs1772719	1.07e-11				1.23738	1.16375	1.31567	0.0938037	TRUE
GCST009049	RAP1GAP	Female	Serum alkaline phosphatase levels	PMID:31675503	Gurdasani D	2019-10-01	14126			1_21571410_T_C	rs4654971	8e-11	-0.514606	-0.669765	-0.359447				0.0829165	FALSE
GCST90025982	RAP1GAP	Female	Heel bone mineral density T score	PMID:34226706	Barton AR	2021-07-05	445855			1_21576687_C_T	rs4654760	1e-11	-0.0270896	-0.0342656	-0.0199136				0.079858	TRUE
GCST90018950	RAP1GAP	Female	C-reactive protein	PMID:34594039	Sakaue S	2021-09-30	436491			1_21569132_A_T	rs1780318	3e-10							0.0752925	FALSE
GCST90025948	RAP1GAP	Female	Serum phosphate levels	PMID:34226706	Barton AR	2021-07-05	400159			1_21568242_T_C	rs3200254	1.6e-23	0.0303025	0.0236647	0.0369403				0.073788	TRUE
SAIGE_594	RAP1GAP	Female	Urinary calculus		UKB SAIGE	2018-10-24	407648	0	6643	1_21566851_C_A	rs1256332	1.87e-13				1.19602	1.14039	1.25436	0.0728833	TRUE
GCST90025947	RAP1GAP	Female	Serum alkaline phosphatase levels	PMID:34226706	Barton AR	2021-07-05	437896			1_21570274_C_T	rs1256328	2.3e-305	0.0908146	0.0858785	0.0957507				0.0728764	TRUE
GCST90002310	RAP1GAP	Female	Hemoglobin concentration	PMID:32888493	Chen MH	2020-09-01	563946			1_21680950_C_T	rs72660363	1.45e-09	-0.015338	-0.0203027	-0.0103733				0.0717673	TRUE
NEALE2_3148_raw	RAP1GAP	Female	Heel bone mineral density (bmd)		UKB Neale v2	2018-08-01	206496	0		1_22158082_T_C	rs3971300	1.49001e-28	-0.00513472	-0.00604251	-0.00422693				0.0713455	TRUE
GCST003086	RAP1GAP	Female	Kidney stones	PMID:26272126	Oddsson A	2015-08-14	285019		5149	1_21570274_C_T	rs1256328	6e-10				1.21	1.13913	1.28528	0.0710591	FALSE
GCST009599	RAP1GAP	Female	Kidney stones	PMID:31729369	Howles SA	2019-11-15	395044		6536	1_21566851_C_A	rs1256332	6e-11				1.17	1.11625	1.22633	0.0710591	FALSE
GCST005981	RAP1GAP	Female	Phosphorus levels	PMID:29403010	Kanai M	2018-02-05	42793			1_21573903_A_C	rs2275372	2e-11							0.0629847	FALSE
GCST90025948	RAP1GAP	Female	Serum phosphate levels	PMID:34226706	Barton AR	2021-07-05	400159			1_21496799_C_T	rs1697421	0	0.0972826	0.0931014	0.101464				0.0619547	TRUE
GCST000483	RAP1GAP	Female	Folate pathway vitamin levels [Plasma PLP]	PMID:19744961	Hazra A	2009-09-10	4763			1_21563893_G_A	rs1256335	1e-15							0.0594302	FALSE
GCST009652	RAP1GAP	Female	Serum alkaline phosphatase levels	PMID:31666285	Olafsson S	2019-10-30	162774			1_21563267_G_A	rs149344982	1e-157	-0.46	-0.493695	-0.426305				0.0575616	FALSE
GCST90018942	RAP1GAP	Female	Serum alkaline phosphatase levels	PMID:34594039	Sakaue S	2021-09-30	463178			1_21563267_G_A	rs149344982	5E-324	-0.751	-0.751	-0.751				0.0575616	FALSE
GCST90019494	RAP1GAP	Female	Serum alkaline phosphatase levels	PMID:33462484	Sinnott-Armstrong N	2021-01-18	355891			1_21563267_G_A	rs149344982	5E-324	-0.7848	-0.7848	-0.7848				0.0575616	FALSE
GCST90025947	RAP1GAP	Female	Serum alkaline phosphatase levels	PMID:34226706	Barton AR	2021-07-05	437896			1_21563267_G_A	rs149344982	0	-0.755555	-0.771475	-0.739635				0.0575616	TRUE
GCST90025948	RAP1GAP	Female	Serum phosphate levels	PMID:34226706	Barton AR	2021-07-05	400159			1_21563142_T_C	rs1780316	1.3e-86	0.0987626	0.08991	0.107615				0.0573494	TRUE
GCST90025982	RAP1GAP	Female	Heel bone mineral density T score	PMID:34226706	Barton AR	2021-07-05	445855			1_21563142_T_C	rs1780316	4.3e-13	-0.0289747	-0.0366424	-0.021307				0.0573494	TRUE
GCST005061	RAP1GAP	Female	Serum alkaline phosphatase levels	PMID:28887542	Prins BP	2017-09-08	9733	25901		1_21351796_C_G	rs7531590	1.10334e-08	-0.02	-0.02	-0.02				0.0513601	TRUE
FINNGEN_R6_N14_CALCUKIDUR	RAP1GAP	Female	Calculus of kidney and ureter		FINNGEN_R6	2022-01-24	259928	0	5985	1_21519101_C_T	rs76870025	2.71e-12				1.33372	1.23029	1.44585	0.051284	TRUE
FINNGEN_R6_N14_UROLITHIASIS	RAP1GAP	Female	Urolithiasis		FINNGEN_R6	2022-01-24	260405	0	6462	1_21519101_C_T	rs76870025	3.8e-12				1.31679	1.21839	1.42315	0.0508688	TRUE
GCST90025947	RAP1GAP	Female	Serum alkaline phosphatase levels	PMID:34226706	Barton AR	2021-07-05	437896			1_21544233_A_G	rs9662008	0	-0.197422	-0.204995	-0.189849				0.0498698	TRUE
NEALE2_30020_raw	RAP1GAP	Female	Haemoglobin concentration		UKB Neale v2	2018-08-01	350474	0		1_21680950_C_T	rs72660363	8.94459e-09	-0.0184369	-0.0247218	-0.012152				0.0488163	TRUE
GCST006979	RAP1GAP	Female	Heel bone mineral density	PMID:30598549	Morris JA	2018-12-31	426824			1_21574398_G_A	rs1767447	2.1e-10	-0.0299179	-0.037628	-0.0222078				0.0467897	TRUE
GCST007833	RAP1GAP	Female	Urolithiasis	PMID:30975718	Tanikawa C	2019-04-11	198769	6106	11130	1_21500073_A_G	rs6667242	3e-10				1.08696	1.05912	1.11553	0.0435517	FALSE
GCST009667	RAP1GAP	Female	Pallidum volume	PMID:31636452	Satizabal CL	2019-10-21	34413	1110		1_21543720_C_T	rs12567402	4e-09	5.876	3.91873	7.83327				0.0430908	FALSE
GCST90038631	RAP1GAP	Female	Kidney stone, ureter stone or bladder stone	PMID:33959723	Donertas HM	2021-04-08	484598		3725	1_21518068_A_G	rs116245586	6.3e-10				1.00306	1.00209	1.00403	0.0425117	TRUE
GCST90025947	RAP1GAP	Female	Serum alkaline phosphatase levels	PMID:34226706	Barton AR	2021-07-05	437896			1_21557249_G_A	rs17421553	2.6e-184	-0.120825	-0.128977	-0.112673				0.0419247	TRUE
GCST009598	RAP1GAP	Female	Kidney stones	PMID:31729369	Howles SA	2019-11-15	429501		12123	1_21509847_C_T	rs10917002	3e-11				1.13	1.09	1.17147	0.041233	FALSE
GCST009599	RAP1GAP	Female	Kidney stones	PMID:31729369	Howles SA	2019-11-15	395044		6536	1_21510441_C_T	rs6703976	4e-09				1.18	1.1167	1.24688	0.0410289	FALSE
SAIGE_594_3	RAP1GAP	Female	Calculus of ureter		UKB SAIGE	2018-10-24	403422	0	2417	1_21566851_C_A	rs1256332	1.09e-08				1.25734	1.16253	1.35989	0.0394423	TRUE
GCST90025947	RAP1GAP	Female	Serum alkaline phosphatase levels	PMID:34226706	Barton AR	2021-07-05	437896			1_21494365_G_A	rs16825415	2e-87	0.133236	0.118305	0.148167				0.0392218	TRUE
SAIGE_594	RAP1GAP	Female	Urinary calculus		UKB SAIGE	2018-10-24	407648	0	6643	1_21509847_C_T	rs10917002	5.93e-12				1.21774	1.15136	1.28796	0.0387801	TRUE
GCST90018706	RAP1GAP	Female	Type 2 diabetes	PMID:34594039	Sakaue S	2021-09-30	177415		45383	1_21788798_G_A	rs34759301	5e-10	-0.0607408	-0.0798837	-0.0415979				0.0385989	FALSE
GCST000248_2	RAP1GAP	Female	Liver enzyme levels [ALP]	PMID:18940312	Yuan X	2008-10-10	7751	4674		1_21495264_A_G	rs1780324	7e-15	-0.03	-0.0375535	-0.0224465				0.037991	FALSE
GCST010553	RAP1GAP	Female	Type 2 diabetes	PMID:32541925	Vujkovic M	2020-06-15	216287		46511	1_21741833_A_G	rs1825307	6e-09	-0.0595	-0.079549	-0.039451				0.0360948	FALSE
GCST007847	RAP1GAP	Female	Type 2 diabetes	PMID:30718926	Suzuki K	2019-02-04	191764		36614	1_21741833_A_G	rs1825307	2e-09				0.943396	0.925603	0.961532	0.0354846	FALSE
GCST90013693	RAP1GAP	Female	Type 2 diabetes	PMID:32514122	Ishigaki K	2020-06-08	210865		40250	1_21741833_A_G	rs1825307	4e-09				0.944275	0.926411	0.962483	0.0354606	FALSE
GCST90025947	RAP1GAP	Female	Serum alkaline phosphatase levels	PMID:34226706	Barton AR	2021-07-05	437896			1_21529626_T_C	rs1697407	6.3e-27	0.0360211	0.0267358	0.0453064				0.0350648	TRUE
GCST001217_7	RAP1GAP	Female	Metabolic traits [SM-14 + 6 other traits]	PMID:21886157	Suhre K	2011-08-31	2820			1_21494497_A_G	rs10799701	3e-20	0.131	0.103149	0.158851				0.0343395	FALSE
GCST90018926	RAP1GAP	Female	Type 2 diabetes	PMID:34594039	Sakaue S	2021-09-30	667504		84224	1_21785681_C_A	rs11802899	1e-10	-0.0497	-0.064763	-0.034637				0.0334616	FALSE
GCST90025959	RAP1GAP	Female	C-reactive protein levels	PMID:34226706	Barton AR	2021-07-05	436939			1_21496799_C_T	rs1697421	1.7e-14	0.0175417	0.0137333	0.0213501				0.0332006	TRUE
GCST000703	RAP1GAP	Female	Phosphorus levels	PMID:20558539	Kestenbaum B	2010-06-17	16264	5444		1_21496799_C_T	rs1697421	1e-27	0.05	0.0410198	0.0589802				0.0330045	FALSE
GCST002442_8	RAP1GAP	Female	Blood metabolite ratios [DSGEGDFXAEGGGVR/ADpSGEGDFXAEGGGVR]	PMID:24816252	Shin SY	2014-05-11	5591	1767		1_21496799_C_T	rs1697421	2e-20	-0.056	-0.0678501	-0.0441499				0.0330045	FALSE
GCST90025947	RAP1GAP	Female	Serum alkaline phosphatase levels	PMID:34226706	Barton AR	2021-07-05	437896			1_21496799_C_T	rs1697421	0	-0.104091	-0.107705	-0.100477				0.0330045	TRUE
GCST002442_4	RAP1GAP	Female	Blood metabolite ratios [ADSGEGDFXAEGGGVR/ADpSGEGDFXAEGGGVR]	PMID:24816252	Shin SY	2014-05-11	5591	1767		1_21496799_C_T	rs1697421	3e-14	-0.042	-0.052834	-0.031166				0.0329314	FALSE
GCST002559_3	RAP1GAP	Female	Vitamin B levels in ischemic stroke [Vitamin B6]	PMID:25147783	Keene KL	2014-08-06	2100		2100	1_21496799_C_T	rs1697421	7e-10	0.173	0.118009	0.227991				0.0329314	FALSE
GCST90025990	RAP1GAP	Female	Calcium levels	PMID:34226706	Barton AR	2021-07-05	400792			1_21459575_C_T	rs4654748	6.1e-23	0.0247608	0.0205737	0.0289479				0.032288	TRUE
GCST009870	RAP1GAP	Female	Calcific aortic valve stenosis	PMID:32141789	Theriault S	2019-10-15	359187		5115	1_21546509_C_T	rs12141569	4e-08				0.869565	0.827248	0.914047	0.0315086	FALSE
GCST012020_104	RAP1GAP	Female	Serum metabolite levels [ADpSGEGDFXAEGGGVR*]	PMID:33031748	Feofanova EV	2020-10-01	3926			1_21493549_A_G	rs12132412	3e-13	0.167	0.122127	0.211873				0.0314913	FALSE
GCST007263	RAP1GAP	Female	Cerebrospinal fluid pyridoxal phosphate to pyridoxal ratio	PMID:30583557	Loohuis LM	2018-12-22	493			1_21493549_A_G	rs12132412	4e-09							0.0313594	FALSE
GCST009777	RAP1GAP	Female	C-reactive protein levels	PMID:31900758	Han X	2020-01-03	418642			1_21493549_A_G	rs12132412	2e-12	0.0166046	0.0119781	0.0212311				0.0313594	FALSE
GCST90089866	RAP1GAP	Female	Serum levels of protein SMR3A	PMID:35078996	Gudjonsson A	2022-01-25	5361			1_21493549_A_G	rs12132412	2e-12	-0.133627	-0.170859	-0.0963949				0.0313594	FALSE
GCST90025971	RAP1GAP	Female	Immature fraction of reticulocytes	PMID:34226706	Barton AR	2021-07-05	438154			1_21782877_G_A	rs10917042	8.8e-12	0.0156504	0.0110422	0.0202586				0.0303494	TRUE
GCST90025947	RAP1GAP	Female	Serum alkaline phosphatase levels	PMID:34226706	Barton AR	2021-07-05	437896			1_21468939_G_GA	rs35175190	2.6e-125	0.0719782	0.0670871	0.0768693				0.0303172	TRUE
GCST90025948	RAP1GAP	Female	Serum phosphate levels	PMID:34226706	Barton AR	2021-07-05	400159			1_21503847_T_C	rs56702468	1.3e-80	-0.0479255	-0.0524087	-0.0434423				0.0302343	TRUE
GCST012398	RAP1GAP	Female	Calcium levels	PMID:33887147	Young WJ	2021-04-22	305349			1_21493549_A_G	rs12132412	2e-20	0.002386	0.0018811	0.0028909				0.0297453	FALSE
GCST90018951	RAP1GAP	Female	Calcium levels	PMID:34594039	Sakaue S	2021-09-30	399133			1_21493549_A_G	rs12132412	8e-31	0.0276	0.0229136	0.0322864				0.0297453	FALSE
GCST90090380	RAP1GAP	Female	Serum levels of protein STIM1	PMID:35078996	Gudjonsson A	2022-01-25	5361			1_21493549_A_G	rs12132412	4e-20	-0.173305	-0.210274	-0.136336				0.0297453	FALSE
GCST90018715	RAP1GAP	Female	Urolithiasis	PMID:34594039	Sakaue S	2021-09-30	178726		11699	1_21511262_A_G	rs16825455	1e-11	0.099846	0.0710943	0.128598				0.0291918	FALSE
GCST90018935	RAP1GAP	Female	Urolithiasis	PMID:34594039	Sakaue S	2021-09-30	667072		17922	1_21504166_T_G	rs13353032	6e-20	0.1199	0.0942006	0.145599				0.0289815	FALSE
GCST90025947	RAP1GAP	Female	Serum alkaline phosphatase levels	PMID:34226706	Barton AR	2021-07-05	437896			1_21394545_A_G	rs2873296	4.8e-25	-0.0162677	-0.0199035	-0.0126319				0.0285129	TRUE
GCST90025947	RAP1GAP	Female	Serum alkaline phosphatase levels	PMID:34226706	Barton AR	2021-07-05	437896			1_21490760_A_G	rs10733029	4.1e-49	-0.0739741	-0.0858873	-0.0620609				0.0278818	TRUE
GCST90025948	RAP1GAP	Female	Serum phosphate levels	PMID:34226706	Barton AR	2021-07-05	400159			1_21490760_A_G	rs10733029	7.7e-19	0.0547788	0.0409891	0.0685685				0.0278818	TRUE
GCST90025947	RAP1GAP	Female	Serum alkaline phosphatase levels	PMID:34226706	Barton AR	2021-07-05	437896			1_21530123_C_T	rs1256349	4.5e-116	-0.0552663	-0.0601777	-0.0503549				0.0278237	TRUE
GCST90012112	RAP1GAP	Female	Total testosterone levels	PMID:32042192	Ruth KS	2020-02-10	230454			1_21775835_G_C	rs10799713	9.2e-16	-0.0270994	-0.0338039	-0.0203949				0.027621	TRUE
GCST007260	RAP1GAP	Female	B6 vitamer levels (multivariate analysis)	PMID:30583557	Loohuis LM	2018-12-22	493			1_21490592_C_T	rs1106357	8e-10							0.027201	FALSE
GCST005981	RAP1GAP	Female	Phosphorus levels	PMID:29403010	Kanai M	2018-02-05	42793			1_21490592_C_T	rs1106357	7e-18							0.0264632	FALSE
GCST90025947	RAP1GAP	Female	Serum alkaline phosphatase levels	PMID:34226706	Barton AR	2021-07-05	437896			1_21480258_C_T	rs12083322	2.1e-58	0.0451824	0.0406952	0.0496696				0.0263145	TRUE
GCST90025948	RAP1GAP	Female	Serum phosphate levels	PMID:34226706	Barton AR	2021-07-05	400159			1_21480258_C_T	rs12083322	1.1e-33	-0.0430875	-0.0482768	-0.0378982				0.0263145	TRUE
GCST90019516	RAP1GAP	Female	Serum phosphate levels	PMID:33462484	Sinnott-Armstrong N	2021-01-18	325141			1_21513197_T_C	rs975000	1e-93	0.0556	0.0502937	0.0609063				0.0261466	FALSE
GCST90025947	RAP1GAP	Female	Serum alkaline phosphatase levels	PMID:34226706	Barton AR	2021-07-05	437896			1_21852881_A_G	rs140173650	7.3e-17	-0.0651471	-0.0805486	-0.0497456				0.0260633	TRUE
GCST90025948	RAP1GAP	Female	Serum phosphate levels	PMID:34226706	Barton AR	2021-07-05	400159			1_21405241_C_T	rs7555660	1.9e-58	0.0597918	0.0523301	0.0672535				0.024753	TRUE
GCST011427_391	RAP1GAP	Female	Protein quantitative trait loci (liver) [MGMT]	PMID:32778093	He B	2020-08-10	287			1_21470011_G_C	rs72872288	3e-08							0.0225108	FALSE
GCST007068	RAP1GAP	Female	Mean corpuscular hemoglobin	PMID:30595370	Kichaev G	2018-12-27	443000			1_21129066_C_G	rs7556221	2e-13							0.0215725	FALSE
GCST000483	RAP1GAP	Female	Folate pathway vitamin levels [Plasma PLP]	PMID:19744961	Hazra A	2009-09-10	4763			1_21459575_C_T	rs4654748	4e-11							0.0204588	FALSE
GCST009537_14	RAP1GAP	Female	White matter microstructure (axial diusivities) [Posterior limb of internal capsule]	PMID:31666681	Zhao B	2019-10-30	17706			1_21183149_A_T	rs4654906	4e-08							0.0202744	FALSE
GCST90002340	RAP1GAP	Female	Monocyte count	PMID:32888493	Chen MH	2020-09-01	521594			1_21190868_A_G	rs17453044	4.82e-09	-0.011029	-0.0147197	-0.00733832				0.0200933	TRUE
NEALE2_30270_raw	RAP1GAP	Female	Mean sphered cell volume		UKB Neale v2	2018-08-01	344729	0		1_21145113_T_A	rs12035087	3.56848e-09	-0.07524	-0.100221	-0.0502586				0.0197714	TRUE
NEALE2_30220_raw	RAP1GAP	Female	Basophill percentage		UKB Neale v2	2018-08-01	349861	0		1_21179783_T_A		7.6e-14	-0.0109272	-0.0137917	-0.0080627				0.0197588	TRUE
GCST007264	RAP1GAP	Female	Plasma pyridoxal phosphate to pyridoxal ratio	PMID:30583557	Loohuis LM	2018-12-22	493			1_21459575_C_T	rs4654748	4e-09							0.0197164	FALSE
GCST90002379	RAP1GAP	Female	Basophil count	PMID:32888494	Vuckovic D	2020-09-01	408112			1_21986976_G_C	rs3806296	1.7e-08	0.0135036	0.00881373	0.0181935				0.0194859	TRUE
GCST90002369	RAP1GAP	Female	Red cell distribution width	PMID:32888493	Chen MH	2020-09-01	531774			1_21241199_G_A	rs2282716	1.59e-10	0.025625	0.0177791	0.0334709				0.0190005	TRUE
GCST90025947	RAP1GAP	Female	Serum alkaline phosphatase levels	PMID:34226706	Barton AR	2021-07-05	437896			1_21295043_T_G	rs213051	1.6e-120	-0.0423111	-0.0462538	-0.0383684				0.0189144	TRUE
GCST90002302	RAP1GAP	Female	Eosinophil counts	PMID:32888493	Chen MH	2020-09-01	583850			1_21193956_A_G	rs9426660	1e-10							0.0187566	FALSE
GCST90013406	RAP1GAP	Female	Liver enzyme levels (alkaline phosphatase)	PMID:33972514	Pazoki R	2021-05-10	437438	315572		1_21438718_A_G	rs6680628	1e-300	-0.0144254	-0.0151882	-0.0136626				0.0186187	FALSE
GCST000358_4	RAP1GAP	Female	Folate pathway vitamin levels [vitamin B6]	PMID:19303062	Tanaka T	2009-03-18	2934	686		1_21459575_C_T	rs4654748	8e-18	1.45	1.11952	1.78048				0.0184734	FALSE
GCST90002346	RAP1GAP	Female	Mean platelet volume	PMID:32888493	Chen MH	2020-09-01	460935			1_21179439_T_G	rs9426656	1.19e-08	-0.010923	-0.0146764	-0.0071696				0.018276	TRUE
GCST90025947	RAP1GAP	Female	Serum alkaline phosphatase levels	PMID:34226706	Barton AR	2021-07-05	437896			1_21449091_C_T	rs12033776	5.3e-10	-0.0468171	-0.0584621	-0.0351721				0.0175561	TRUE
GCST90025948	RAP1GAP	Female	Serum phosphate levels	PMID:34226706	Barton AR	2021-07-05	400159			1_21459575_C_T	rs4654748	0	0.0956502	0.0914709	0.0998295				0.0174883	TRUE
NEALE2_1180	RAP1GAP	Female	Morning/evening person (chronotype)		UKB Neale v2	2018-08-01	322488	0		1_21207277_ATTTT_A	rs748763382	2.41262e-10	-0.0148862	-0.0194936	-0.0102788				0.0174404	TRUE
GCST90019464	RAP1GAP	Female	von Willebrand factor A domain-containing protein 1 measurement	PMID:33328453	Pietzner M	2020-12-16	10708			1_21874505_C_T	rs2229481	5.321e-23	-0.3918	-0.469612	-0.313988				0.0173143	TRUE
GCST90025948	RAP1GAP	Female	Serum phosphate levels	PMID:34226706	Barton AR	2021-07-05	400159			1_21404985_T_C	rs76568001	1.1e-13	-0.0284182	-0.0373695	-0.0194669				0.0171961	TRUE
GCST90002395	RAP1GAP	Female	Mean platelet volume	PMID:32888494	Vuckovic D	2020-09-01	408112			1_21198735_T_C	rs1609558	4.9e-08	-0.0111144	-0.0151086	-0.00712019				0.0169512	TRUE
GCST90025949	RAP1GAP	Female	Height	PMID:34226706	Barton AR	2021-07-05	458235			1_21290439_G_T	rs142246501	7.6e-12	0.0167133	0.0121875	0.0212391				0.0167666	TRUE
GCST007020	RAP1GAP	Female	Male-pattern baldness	PMID:30573740	Yap CX	2018-12-20	205327			1_21303798_C_T	rs12737859	1e-08	0.0281518	0.0185234	0.0377802				0.0165485	FALSE
GCST90025947	RAP1GAP	Female	Serum alkaline phosphatase levels	PMID:34226706	Barton AR	2021-07-05	437896			1_21440170_G_C	rs1566523	0	-0.112639	-0.116258	-0.10902				0.0165145	TRUE
GCST90025978	RAP1GAP	Female	Lung function (FEV1/FVC)	PMID:34226706	Barton AR	2021-07-05	371898			1_22165491_A_G	rs2807357	4e-10	0.0133641	0.00906786	0.0176603				0.0162523	TRUE
GCST001276	RAP1GAP	Female	Liver enzyme levels (alkaline phosphatase)	PMID:22001757	Chambers JC	2011-10-16	61089			1_21439960_A_C	rs1976403	2e-50	3.6	3.1275	4.0725				0.0162349	FALSE
NEALE2_23126_raw	RAP1GAP	Female	Arm predicted mass (left)		UKB Neale v2	2018-08-01	354653	0		1_21264319_CCT_C	rs771702707	4.21186e-10	0.00703384	0.00482666	0.00924102				0.0160973	TRUE
GCST007063	RAP1GAP	Female	Fat-free mass	PMID:30593698	Hubel C	2018-12-28	155961			1_21258448_T_C	rs212526	2e-08							0.0160053	FALSE
GCST90025946	RAP1GAP	Female	Creatinine levels	PMID:34226706	Barton AR	2021-07-05	437660			1_21496799_C_T	rs1697421	2.7e-12	0.0134996	0.00962047	0.0173787				0.0157724	TRUE
NEALE2_23121_raw	RAP1GAP	Female	Arm fat-free mass (right)		UKB Neale v2	2018-08-01	354732	0		1_21264319_CCT_C	rs771702707	9.565e-10	0.00680316	0.00462319	0.00898313				0.0157506	TRUE
NEALE2_23122_raw	RAP1GAP	Female	Arm predicted mass (right)		UKB Neale v2	2018-08-01	354726	0		1_21262110_C_G	rs212532	6.24164e-10	0.00617265	0.00421637	0.00812893				0.0157489	TRUE
GCST90000026	RAP1GAP	Female	Appendicular lean mass	PMID:33097823	Pei YF	2020-10-23	205513			1_21262110_C_G	rs212532	7.3e-13	0.0200849	0.0144718	0.025698				0.0156221	TRUE
GCST90002296	RAP1GAP	Female	Basophil count	PMID:32888493	Chen MH	2020-09-01	577663			1_21180437_C_T	rs4060971	9e-21							0.0155503	FALSE
NEALE2_20015_raw	RAP1GAP	Female	Sitting height		UKB Neale v2	2018-08-01	360066	0		1_21243400_TAAA_T	rs1187658309	4.4e-14	0.0682243	0.0505104	0.0859382				0.015391	TRUE
GCST90025949	RAP1GAP	Female	Height	PMID:34226706	Barton AR	2021-07-05	458235			1_21258092_A_G	rs212525	2e-42	0.0212755	0.0182032	0.0243478				0.0152879	TRUE
GCST90019500	RAP1GAP	Female	Calcium levels	PMID:33462484	Sinnott-Armstrong N	2021-01-18	325659			1_21320730_G_A	rs71636972	8e-19	-0.0342	-0.0417657	-0.0266343				0.0152218	FALSE
GCST010989	RAP1GAP	Female	Body size at age 10	PMID:32376654	Richardson TG	2020-05-06	453169			1_21250666_T_A	rs212517	1e-09							0.0151963	FALSE
GCST006950	RAP1GAP	Female	Feeling worry	PMID:29500382	Nagel M	2018-03-02	372869			1_21331014_C_T	rs7543687	2.753e-08	-0.0164255	-0.02222	-0.0106311				0.0151618	TRUE
GCST007841	RAP1GAP	Female	Height	PMID:30595370	Kichaev G	2018-12-27	458000			1_21258448_T_C	rs212526	2e-43							0.0150296	FALSE
GCST002647	RAP1GAP	Female	Height	PMID:25282103	Wood AR	2014-10-05	253288	80067		1_21256818_T_C	rs212524	5e-12	0.021	0.0150396	0.0269604				0.0149651	FALSE
GCST90002292	RAP1GAP	Female	Basophil count	PMID:32888493	Chen MH	2020-09-01	474001			1_21180437_C_T	rs4060971	1.85e-23	-0.02066	-0.0247152	-0.0166048				0.0149602	TRUE
GCST90025947	RAP1GAP	Female	Serum alkaline phosphatase levels	PMID:34226706	Barton AR	2021-07-05	437896			1_21847887_T_C	rs113578258	6.9e-20	-0.0569368	-0.069851	-0.0440226				0.0147329	TRUE
GCST006568	RAP1GAP	Female	Highest math class taken (MTAG) [MTAG]	PMID:30038396	Lee JJ	2018-07-23	811539			1_21324171_T_C	rs213024	1e-09	0.0102	0.00692767	0.0134723				0.0146631	FALSE
GCST007986	RAP1GAP	Female	Ease of getting up in the morning	PMID:30804565	Jansen PR	2019-02-25	385949			1_21208837_T_C	rs12752290	1e-12	0.0124	0.00899155	0.0158085				0.0146454	FALSE
NEALE2_5133_raw	RAP1GAP	Female	6mm strong meridian (right)		UKB Neale v2	2018-08-01	66256	0		1_22166029_C_T	rs2223480	1.74632e-08	-0.0484485	-0.0652968	-0.0316002				0.0146343	TRUE
GCST90002387	RAP1GAP	Female	Immature fraction of reticulocytes	PMID:32888494	Vuckovic D	2020-09-01	408112			1_21758559_C_T	rs145801878	3.9e-26	0.0646029	0.05263	0.0765758				0.0145577	TRUE
NEALE2_20153_raw	RAP1GAP	Female	Forced expiratory volume in 1-second (fev1), predicted		UKB Neale v2	2018-08-01	117241	0		1_21264319_CCT_C	rs771702707	1.89514e-09	0.00571527	0.00385047	0.00758007				0.0144177	TRUE
GCST90025962	RAP1GAP	Female	Mean corpuscular hemoglobin concentration	PMID:34226706	Barton AR	2021-07-05	443081			1_21198735_T_C	rs1609558	1.4e-16	0.0144378	0.0107872	0.0180884				0.014399	TRUE
NEALE2_23101_raw	RAP1GAP	Female	Whole body fat-free mass		UKB Neale v2	2018-08-01	354808	0		1_21264319_CCT_C	rs771702707	8.747e-12	0.108479	0.0773307	0.139627				0.0143397	TRUE
NEALE2_23102_raw	RAP1GAP	Female	Whole body water mass		UKB Neale v2	2018-08-01	354834	0		1_21264319_CCT_C	rs771702707	8.751e-12	0.0798909	0.0569509	0.102831				0.0143172	TRUE
NEALE2_23105_raw	RAP1GAP	Female	Basal metabolic rate		UKB Neale v2	2018-08-01	354825	0		1_21264319_CCT_C	rs771702707	1.14272e-09	12.9621	8.7892	17.135				0.0142876	TRUE
NEALE2_23125_raw	RAP1GAP	Female	Arm fat-free mass (left)		UKB Neale v2	2018-08-01	354668	0		1_21264319_CCT_C	rs771702707	1.61381e-10	0.00765596	0.00530927	0.0100026				0.0142742	TRUE
NEALE2_2395_3	RAP1GAP	Female	Pattern 3 | hair/balding pattern		UKB Neale v2	2018-08-01	165649	0	44304	1_21264261_A_G	rs212534	3.12228e-08				0.957527	0.942922	0.972358	0.0141992	TRUE
GCST90091061	RAP1GAP	Female	Cortical thickness	PMID:34560273	Shadrin AA	2021-09-21	35657			1_21921005_C_T	rs12131384	1e-14							0.0141545	FALSE
GCST90025990	RAP1GAP	Female	Calcium levels	PMID:34226706	Barton AR	2021-07-05	400792			1_21320730_G_A	rs71636972	8e-18	-0.0313087	-0.0377579	-0.0248595				0.0141023	TRUE
GCST90095131	RAP1GAP	Female	Vertex-wise cortical thickness	PMID:34910505	van der Meer D	2021-12-15	33748			1_21172244_C_T	rs59537090	2e-15	7.96	5.9954	9.9246				0.0140487	FALSE
GCST90025998	RAP1GAP	Female	Lung function (FVC)	PMID:34226706	Barton AR	2021-07-05	371898			1_22159378_T_G	rs16826658	2.9e-09	0.0131605	0.00895683	0.0173642				0.013951	TRUE
NEALE2_23130_raw	RAP1GAP	Female	Trunk predicted mass		UKB Neale v2	2018-08-01	354494	0		1_21264319_CCT_C	rs771702707	1.9e-14	0.0602211	0.0448082	0.075634				0.0139222	TRUE
GCST90000027	RAP1GAP	Female	Appendicular lean mass	PMID:33097823	Pei YF	2020-10-23	244730			1_21248552_A_C	rs212515	1.1e-19	0.0226679	0.0177061	0.0276297				0.0138475	TRUE
GCST90095131	RAP1GAP	Female	Vertex-wise cortical thickness	PMID:34910505	van der Meer D	2021-12-15	33748			1_21919263_T_C	rs4233277	7e-16	-8.07	-10.0299	-6.11013				0.0138365	FALSE
NEALE2_5132_raw	RAP1GAP	Female	3mm strong meridian (right)		UKB Neale v2	2018-08-01	75410	0		1_22159184_A_G	rs12093861	2.84798e-08	-0.0449581	-0.060832	-0.0290842				0.0138333	TRUE
GCST90002292	RAP1GAP	Female	Basophil count	PMID:32888493	Chen MH	2020-09-01	474001			1_21986976_G_C	rs3806296	6.06e-09	0.013359	0.00885884	0.0178592				0.013833	TRUE
GCST007080	RAP1GAP	Female	Lung function (FEV1/FVC)	PMID:30595370	Kichaev G	2018-12-27	370000			1_21918099_C_T	rs9426781	4e-09							0.0137483	FALSE
GCST90025949	RAP1GAP	Female	Height	PMID:34226706	Barton AR	2021-07-05	458235			1_21922388_G_A	rs10799719	9.4e-14	-0.0117019	-0.0148096	-0.00859422				0.0137416	TRUE
GCST008595	RAP1GAP	Female	Cognitive ability, years of educational attainment or schizophrenia (pleiotropy)	PMID:31374203	Lam M	2019-08-01	556676			1_22103576_G_A	rs2143103	3e-09							0.0137151	FALSE
GCST90011875	RAP1GAP	Female	Cognitive aspects of educational attainment	PMID:33414549	Demange PA	2021-01-07	257700			1_22103576_G_A	rs2143103	1e-08	0.0499784	0.032885	0.0670718				0.0137151	FALSE
GCST90091061	RAP1GAP	Female	Cortical thickness	PMID:34560273	Shadrin AA	2021-09-21	35657			1_21186813_C_T	rs61779124	3e-14							0.013678	FALSE
GCST009822	RAP1GAP	Female	Gynecologic disease	PMID:31488892	Masuda T	2019-09-05	46871		7315	1_22109953_G_C	rs7412010	4e-10							0.0136251	FALSE
GCST009833	RAP1GAP	Female	Uterine fibroids (MTAG)	PMID:31488892	Masuda T	2019-09-05	44792		5236	1_22109953_G_C	rs7412010	5e-08							0.0136251	FALSE
GCST90018619	RAP1GAP	Female	Endometriosis	PMID:34594039	Sakaue S	2021-09-30	82761		1786	1_22109953_G_C	rs7412010	2e-09							0.0136251	FALSE
GCST009834	RAP1GAP	Female	Uterine fibroids	PMID:31488892	Masuda T	2019-09-05	44792		5236	1_22096228_G_A	rs10917151	5e-12							0.0136216	FALSE
NEALE2_1170	RAP1GAP	Female	Getting up in morning		UKB Neale v2	2018-08-01	360231	0		1_21208837_T_C	rs12752290	3.6365e-11	0.0118776	0.00836011	0.0153951				0.0135934	TRUE
GCST009824	RAP1GAP	Female	Gynecologic disease	PMID:31488892	Masuda T	2019-09-05	47531		7975	1_22109953_G_C	rs7412010	5e-11							0.0135604	FALSE
GCST009834	RAP1GAP	Female	Uterine fibroids	PMID:31488892	Masuda T	2019-09-05	44792		5236	1_22109953_G_C	rs7412010	1e-12							0.0135604	FALSE
GCST90002322	RAP1GAP	Female	Mean corpuscular hemoglobin	PMID:32888493	Chen MH	2020-09-01	486823			1_21179438_T_G	rs9426736	4.2e-16	0.015712	0.0119272	0.0194968				0.0135568	TRUE
GCST009823_10	RAP1GAP	Female	Gynecologic disease (multivariate analysis) [uterine fibroid]	PMID:31488892	Masuda T	2019-09-05	47331		7975	1_22109953_G_C	rs7412010	7e-11							0.0135451	FALSE
GCST90000025	RAP1GAP	Female	Appendicular lean mass	PMID:33097823	Pei YF	2020-10-23	450243			1_21258448_T_C	rs212526	3.843e-29	0.0214	0.017676	0.025124				0.0135061	TRUE
NEALE2_1697	RAP1GAP	Female	Comparative height size at age 10		UKB Neale v2	2018-08-01	355331	0		1_21253852_T_C	rs212521	1.36177e-26	0.0174801	0.0142703	0.0206899				0.0133829	TRUE
NEALE2_5099_raw	RAP1GAP	Female	3mm weak meridian (right)		UKB Neale v2	2018-08-01	75410	0		1_22159378_T_G	rs16826658	3.88942e-09	-0.0455675	-0.0607321	-0.0304029				0.0133764	TRUE
GCST001894	RAP1GAP	Female	Endometriosis	PMID:23472165	Albertsen HM	2013-03-05	14174	2316	1514	1_22123994_C_T	rs2235529	3e-09				1.3	1.19204	1.41773	0.0133689	FALSE
GCST002496	RAP1GAP	Female	Bone mineral density (paediatric, upper limb)	PMID:24945404	Kemp JP	2014-06-19	9416			1_22123994_C_T	rs2235529	1e-08	-0.117	-0.157016	-0.0769841				0.0133689	FALSE
GCST008734	RAP1GAP	Female	Waist-hip ratio	PMID:30575882	Lotta LA	2018-12-01	663598			1_22123994_C_T	rs2235529	5e-08							0.0133689	FALSE
GCST90018839	RAP1GAP	Female	Endometriosis	PMID:34594039	Sakaue S	2021-09-30	314532		6297	1_22123994_C_T	rs2235529	2e-09	0.1351	0.0909512	0.179249				0.0133574	FALSE
GCST90002379	RAP1GAP	Female	Basophil count	PMID:32888494	Vuckovic D	2020-09-01	408112			1_21179783_T_A		9.3e-21	-0.0207966	-0.025159	-0.0164342				0.0133174	TRUE
GCST006572	RAP1GAP	Female	Cognitive performance	PMID:30038396	Lee JJ	2018-07-23	257841			1_22103576_G_A	rs2143103	9.64e-09	0.02382	0.015686	0.031954				0.013262	TRUE
GCST001894	RAP1GAP	Female	Endometriosis	PMID:23472165	Albertsen HM	2013-03-05	14174	2316	1514	1_22096228_G_A	rs10917151	7e-09				1.28	1.1774	1.39154	0.013253	FALSE
GCST002748	RAP1GAP	Female	Epithelial ovarian cancer	PMID:25581431	Kuchenbaecker KB	2015-01-12	13491	56254	4368	1_22141722_C_T	rs3820282	2e-08							0.0132446	FALSE
GCST012228	RAP1GAP	Female	Waist-hip index	PMID:34021172	Christakoudi S	2021-05-21	186825			1_22135618_G_A	rs12037376	5e-09	-0.0250805	-0.0334876	-0.0166734				0.0132446	FALSE
GCST012229	RAP1GAP	Female	Hip index	PMID:34021172	Christakoudi S	2021-05-21	186825			1_22135618_G_A	rs12037376	5e-10	0.0273921	0.0187593	0.0360249				0.0132446	FALSE
GCST012230	RAP1GAP	Female	Waist-to-hip ratio adjusted for BMI	PMID:34021172	Christakoudi S	2021-05-21	186825			1_22135618_G_A	rs12037376	2e-09	-0.0256419	-0.0340213	-0.0172625				0.0132446	FALSE
GCST90002380	RAP1GAP	Female	Basophil percentage of white cells	PMID:32888494	Vuckovic D	2020-09-01	408112			1_21179783_T_A		1.4e-19	-0.0202246	-0.0246024	-0.0158468				0.0132057	TRUE
GCST006462	RAP1GAP	Female	Uterine fibroids	PMID:30194396	Rafnar T	2018-09-07	539925		16595	1_22096228_G_A	rs10917151	5e-14				1.12	1.08745	1.15352	0.0131912	FALSE
GCST004549_2	RAP1GAP	Female	Endometriosis [EA]	PMID:28537267	Sapkota Y	2017-05-24	208903		17045	1_22135618_G_A	rs12037376	1e-12				1.14	1.09967	1.18181	0.0131504	FALSE
NEALE2_23129_raw	RAP1GAP	Female	Trunk fat-free mass		UKB Neale v2	2018-08-01	354530	0		1_21264319_CCT_C	rs771702707	1.4e-14	0.0630861	0.0470126	0.0791596				0.0131398	TRUE
GCST004549	RAP1GAP	Female	Endometriosis	PMID:28537267	Sapkota Y	2017-05-24	208903		17045	1_22135618_G_A	rs12037376	9e-17				1.16	1.12013	1.20129	0.0131236	FALSE
GCST012227	RAP1GAP	Female	Hip circumference adjusted for BMI	PMID:34021172	Christakoudi S	2021-05-21	186825			1_22135618_G_A	rs12037376	2e-14	0.0321716	0.0239296	0.0404136				0.0131236	FALSE
GCST009158	RAP1GAP	Female	Uterine fibroids	PMID:31649266	Gallagher CS	2019-10-24	302979		20406	1_22109953_G_C	rs7412010	2e-29							0.0130914	FALSE
GCST004899	RAP1GAP	Female	Gestational age at birth (maternal effect)	PMID:28877031	Zhang G	2017-09-07	43568	8643		1_22143914_C_T	rs56318008	3e-14	1.05	0.779151	1.32085				0.0130593	FALSE
GCST008423	RAP1GAP	Female	Uterine fibroids	PMID:31249589	Edwards TL	2019-06-12	76494	153780	9446	1_22096228_G_A	rs10917151	2e-24				1.16	1.12738	1.19356	0.0130511	FALSE
GCST90018937	RAP1GAP	Female	Uterine prolapse	PMID:34594039	Sakaue S	2021-09-30	317583		11070	1_22141722_C_T	rs3820282	4e-19	-0.1783	-0.217404	-0.139196				0.013043	FALSE
GCST006250	RAP1GAP	Female	Intelligence	PMID:29942086	Savage JE	2018-06-25	269867			1_22099149_C_T	rs10917152	2.227e-09	0.0242133	0.0162772	0.0321495				0.0129768	TRUE
GCST90002334	RAP1GAP	Female	Mean corpuscular volume	PMID:32888493	Chen MH	2020-09-01	544127			1_21177786_G_A	rs6690574	2e-16	0.014999	0.0114259	0.0185721				0.0129767	TRUE
GCST90000048	RAP1GAP	Female	Age at first birth	PMID:34211149	Mills MC	2021-07-01	418758			1_22020903_A_G	rs12407439	6.859e-09	0.0876	0.058004	0.117196				0.0129337	TRUE
GCST004772	RAP1GAP	Female	Bone mineral density (paediatric, total body less head)	PMID:28743860	Medina-Gomez C	2017-07-25	10414			1_22120823_A_G	rs3765350	9.745e-09	0.0939481	0.0617515	0.126145				0.012853	TRUE
GCST010174	RAP1GAP	Female	Pelvic organ prolapse	PMID:32184442	Olafsdottir T	2020-03-17	355744		15010	1_22141722_C_T	rs3820282	3e-21				0.85	0.821863	0.8791	0.0127559	FALSE
GCST010320	RAP1GAP	Female	PR interval	PMID:32439900	Ntalla I	2020-05-21	271570			1_21957498_C_A	rs4655001	3e-08	0.5825	0.37647	0.78853				0.0127516	FALSE
NEALE2_30200_raw	RAP1GAP	Female	Neutrophill percentage		UKB Neale v2	2018-08-01	349861	0		1_21977779_G_T	rs57648880	4.21469e-10	-0.133003	-0.174739	-0.0912668				0.0127357	TRUE
GCST90000025	RAP1GAP	Female	Appendicular lean mass	PMID:33097823	Pei YF	2020-10-23	450243			1_22166120_A_G	rs58670122	1.111e-18	-0.0239	-0.029192	-0.018608				0.0126791	TRUE
NEALE2_30140_raw	RAP1GAP	Female	Neutrophill count		UKB Neale v2	2018-08-01	349856	0		1_21979453_C_T	rs200678574	7.081e-12	0.0243355	0.0173787	0.0312923				0.0126709	TRUE
GCST006414	RAP1GAP	Female	Atrial fibrillation	PMID:30061737	Nielsen JB	2018-07-30	1030836		60620	1_21956126_T_C	rs7529220	1.983e-10				1.06407	1.04383	1.0847	0.0126684	TRUE
GCST001894	RAP1GAP	Female	Endometriosis	PMID:23472165	Albertsen HM	2013-03-05	14174	2316	1514	1_22113027_T_C	rs4654783	7e-09				0.78125	0.718627	0.84933	0.0126488	FALSE
FINNGEN_R6_CD2_BENIGN	RAP1GAP	Female	Benign neoplasms		FINNGEN_R6	2022-01-24	260405	0	62983	1_22139327_T_C	rs61768001	1.06e-08				1.05822	1.0379	1.07894	0.0126084	TRUE
GCST90013720	RAP1GAP	Female	Uterine fibroids	PMID:32514122	Ishigaki K	2020-06-08	100964		5954	1_22141722_C_T	rs3820282	2e-15				1.18273	1.13474	1.23275	0.0125872	FALSE
GCST90002392	RAP1GAP	Female	Mean corpuscular volume	PMID:32888494	Vuckovic D	2020-09-01	408112			1_21198735_T_C	rs1609558	5.8e-14	0.0154345	0.0114071	0.0194619				0.0125627	TRUE
GCST002492	RAP1GAP	Female	Bone mineral density (paediatric, lower limb)	PMID:24945404	Kemp JP	2014-06-19	9416			1_22120823_A_G	rs3765350	3e-08	-0.097	-0.131309	-0.0626912				0.0125433	FALSE
GCST90095129	RAP1GAP	Female	Vertex-wise sulcal depth	PMID:34910505	van der Meer D	2021-12-15	33748			1_21957178_C_T	rs10917075	2e-17	-8.5	-10.4614	-6.53857				0.012511	FALSE
GCST002494	RAP1GAP	Female	Bone mineral density (paediatric, total body less head)	PMID:24945404	Kemp JP	2014-06-19	9416			1_22120823_A_G	rs3765350	7e-10	-0.107	-0.141012	-0.0729882				0.0124696	FALSE
GCST002494_2	RAP1GAP	Female	Bone mineral density (paediatric, total body less head) [EA]	PMID:24945404	Kemp JP	2014-06-19	9416			1_22120823_A_G	rs3765350	4e-09	-0.1159	-0.154506	-0.0772942				0.0124696	FALSE
GCST004609	RAP1GAP	Female	Monocyte percentage of white cells	PMID:27863252	Astle WJ	2016-11-17	170494			1_21996019_A_G	rs10799728	2.416e-08	-0.0210007	-0.0283783	-0.0136231				0.0124517	TRUE
GCST007067	RAP1GAP	Female	Waist-hip ratio	PMID:30595370	Kichaev G	2018-12-27	458000			1_22132301_A_G	rs12404660	2e-13							0.0124253	FALSE
GCST008733	RAP1GAP	Female	Waist-to-hip ratio adjusted for BMI	PMID:30575882	Lotta LA	2018-12-01	660648			1_22123994_C_T	rs2235529	2e-17	-0.021	-0.0258459	-0.0161541				0.012423	FALSE
GCST004608	RAP1GAP	Female	Granulocyte percentage of myeloid white cells	PMID:27863252	Astle WJ	2016-11-17	169545			1_21996019_A_G	rs10799728	1.826e-09	0.0226955	0.0152972	0.0300938				0.012297	TRUE
GCST90018978	RAP1GAP	Female	White blood cell count	PMID:34594039	Sakaue S	2021-09-30	504825			1_21975934_C_G	rs10917087	2e-09							0.0122761	FALSE
GCST90000050	RAP1GAP	Female	Age at first birth	PMID:34211149	Mills MC	2021-07-01	542901			1_22020903_A_G	rs12407439	4.367e-08	0.0754	0.048352	0.102448				0.0122758	TRUE
GCST001720	RAP1GAP	Female	Endometriosis	PMID:23104006	Nyholt DR	2012-10-28	13997	5061	4604	1_22164231_C_A	rs7521902	3e-11				1.19	1.1305	1.25264	0.0122271	FALSE
GCST90025982	RAP1GAP	Female	Heel bone mineral density T score	PMID:34226706	Barton AR	2021-07-05	445855			1_22164231_C_A	rs7521902	7.3e-84	-0.0403905	-0.0446413	-0.0361397				0.0122271	TRUE
GCST008839	RAP1GAP	Female	Height	PMID:31562340	Akiyama M	2019-09-27	159095	32692		1_22029485_G_A	rs10917123	1e-08							0.0120773	FALSE
GCST90018714	RAP1GAP	Female	Uterine fibroids	PMID:34594039	Sakaue S	2021-09-30	80208		14475	1_22141722_C_T	rs3820282	9e-35	0.170805	0.143589	0.198022				0.012053	FALSE
NEALE2_20151_raw	RAP1GAP	Female	Forced vital capacity (fvc), best measure		UKB Neale v2	2018-08-01	272338	0		1_22123994_C_T	rs2235529	1e-15	0.0205438	0.0155192	0.0255684				0.0120399	TRUE
NEALE2_23125_raw	RAP1GAP	Female	Arm fat-free mass (left)		UKB Neale v2	2018-08-01	354668	0		1_22166120_A_G	rs58670122	7.92168e-10	-0.00995997	-0.0131359	-0.00678401				0.0120234	TRUE
NEALE2_5096_raw	RAP1GAP	Female	3mm weak meridian (left)		UKB Neale v2	2018-08-01	75398	0		1_22159378_T_G	rs16826658	2.64494e-09	-0.0460757	-0.061246	-0.0309054				0.0119833	TRUE
GCST90025982	RAP1GAP	Female	Heel bone mineral density T score	PMID:34226706	Barton AR	2021-07-05	445855			1_22121030_G_A	rs10753529	1.3e-33	-0.0393664	-0.0460524	-0.0326804				0.0118218	TRUE
GCST007044	RAP1GAP	Female	Extremely high intelligence	PMID:29520040	Coleman JRI	2018-03-08	87740		1247	1_22125352_T_C	rs7526484	5e-08	-5.46	-7.42312	-3.49688				0.0117831	FALSE
NEALE2_20150_raw	RAP1GAP	Female	Forced expiratory volume in 1-second (fev1), best measure		UKB Neale v2	2018-08-01	272338	0		1_22168768_G_C	rs2807352	5.7e-14	0.0116271	0.00859439	0.0146598				0.0117238	TRUE
FINNGEN_R6_CD2_BENIGN_LEIOMYOMA_UTERI	RAP1GAP	Female	Leiomyoma of uterus		FINNGEN_R6	2022-01-24	147061	0	21518	1_22139327_T_C	rs61768001	3.81e-26				1.18702	1.1499	1.22534	0.0117193	TRUE
FINNGEN_R6_N14_ENDOMET_INFERT	RAP1GAP	Female	Endometriosis diagnosis and infertility diagnosis occurring together		FINNGEN_R6	2022-01-24	85868	0	1956	1_22143958_G_C	rs55938609	1.47e-09				1.31322	1.20222	1.43446	0.0117129	TRUE
NEALE2_50_raw	RAP1GAP	Female	Standing height		UKB Neale v2	2018-08-01	360388	0		1_22135638_T_G	rs10799737	1.61857e-20	-0.146365	-0.17726	-0.11547				0.0117042	TRUE
FINNGEN_R6_I9_AF	RAP1GAP	Female	Atrial fibrillation and flutter		FINNGEN_R6	2022-01-24	164491	0	28670	1_21977970_A_G	rs12058649	2.03e-08				1.10903	1.06965	1.14987	0.0116371	TRUE
GCST90002374	RAP1GAP	Female	White blood cell count	PMID:32888493	Chen MH	2020-09-01	562243			1_21991914_C_G	rs12132088	2e-15	0.016096	0.0121329	0.0200591				0.0116063	TRUE
NEALE2_4106_raw	RAP1GAP	Female	Heel bone mineral density (bmd) t-score, automated (left)		UKB Neale v2	2018-08-01	114630	0		1_22146013_G_A	rs7519889	8.851e-12	-0.0425819	-0.054811	-0.0303528				0.0115717	TRUE
GCST006979	RAP1GAP	Female	Heel bone mineral density	PMID:30598549	Morris JA	2018-12-31	426824			1_22158082_T_C	rs3971300	5.8e-61	-0.0394225	-0.0434831	-0.0353619				0.0115471	TRUE
FINNGEN_R6_N14_FEMGENPROL	RAP1GAP	Female	Female genital prolapse		FINNGEN_R6	2022-01-24	92512	0	10919	1_22141722_C_T	rs3820282	1.57e-13				0.843268	0.805947	0.882318	0.0114823	TRUE
GCST010321	RAP1GAP	Female	PR interval	PMID:32439900	Ntalla I	2020-05-21	292566			1_21956126_T_C	rs7529220	2e-10	0.58	0.401296	0.758704				0.0114716	FALSE
GCST007841	RAP1GAP	Female	Height	PMID:30595370	Kichaev G	2018-12-27	458000			1_22160087_C_T	rs72865212	7e-36							0.0114496	FALSE
NEALE2_23107_raw	RAP1GAP	Female	Impedance of leg (right)		UKB Neale v2	2018-08-01	354817	0		1_22166394_G_C	rs3920498	7.57346e-09	-0.560523	-0.750668	-0.370378				0.011447	TRUE
GCST90018934	RAP1GAP	Female	Uterine fibroids	PMID:34594039	Sakaue S	2021-09-30	338926		35499	1_22141722_C_T	rs3820282	4e-52	0.1542	0.134306	0.174094				0.0114375	FALSE
GCST90091060	RAP1GAP	Female	Cortical surface area	PMID:34560273	Shadrin AA	2021-09-21	35657			1_22133261_A_G	rs4655025	5e-13							0.0114203	FALSE
GCST90095130	RAP1GAP	Female	Vertex-wise cortical surface area	PMID:34910505	van der Meer D	2021-12-15	33748			1_22133261_A_G	rs4655025	2e-13	-7.35	-9.31032	-5.38968				0.0114203	FALSE
NEALE2_23108_raw	RAP1GAP	Female	Impedance of leg (left)		UKB Neale v2	2018-08-01	354811	0		1_22166394_G_C	rs3920498	1.02405e-08	-0.554905	-0.74482	-0.36499				0.0114122	TRUE
GCST90002407	RAP1GAP	Female	White blood cell count	PMID:32888494	Vuckovic D	2020-09-01	408112			1_22015221_T_C	rs2501309	2.9e-12	-0.0155655	-0.0199359	-0.0111951				0.0114019	TRUE
NEALE2_23121_raw	RAP1GAP	Female	Arm fat-free mass (right)		UKB Neale v2	2018-08-01	354732	0		1_22166120_A_G	rs58670122	5.16888e-10	-0.00935403	-0.0123044	-0.00640364				0.0113877	TRUE
GCST007429	RAP1GAP	Female	Lung function (FVC)	PMID:30804560	Shrine N	2019-02-25	321047	79005		1_22143958_G_C	rs55938609	4.85e-12	0.0227	0.016232	0.029168				0.0113582	TRUE
NEALE2_30190_raw	RAP1GAP	Female	Monocyte percentage		UKB Neale v2	2018-08-01	349861	0		1_21988928_TATAC_T	rs779638088	3.05289e-09	-0.0399521	-0.0531597	-0.0267445				0.0112873	TRUE
GCST002493	RAP1GAP	Female	Bone mineral density (paediatric, skull)	PMID:24945404	Kemp JP	2014-06-19	9385			1_22166394_G_C	rs3920498	2e-12							0.0112837	FALSE
GCST002493_3	RAP1GAP	Female	Bone mineral density (paediatric, skull) [EA]	PMID:24945404	Kemp JP	2014-06-19	9385			1_22166394_G_C	rs3920498	1e-10							0.0112837	FALSE
GCST007430	RAP1GAP	Female	Peak expiratory flow	PMID:30804560	Shrine N	2019-02-25	321047	24218		1_22168298_G_A	rs12747516	7.08e-10	0.0213	0.01444	0.02816				0.0112223	TRUE
GCST001482	RAP1GAP	Female	Lumbar spine bone mineral density	PMID:22504420	Estrada K	2012-04-15	32961	50933		1_22164231_C_A	rs7521902	1e-10	-0.05	-0.065154	-0.034846				0.011211	FALSE
GCST004067_3	RAP1GAP	Female	Hip circumference adjusted for BMI [EA]	PMID:25673412	Shungin D	2015-02-12	142762	80837		1_22164231_C_A	rs7521902	3e-08	0.0242	0.0156405	0.0327595				0.011205	FALSE
NEALE2_2834	RAP1GAP	Female	Bilateral oophorectomy (both ovaries removed)		UKB Neale v2	2018-08-01	191515	0	15629	1_22123994_C_T	rs2235529	2e-13				1.12601	1.09093	1.16222	0.0111908	TRUE
GCST006288	RAP1GAP	Female	Heel bone mineral density	PMID:28869591	Kemp JP	2017-09-04	142487			1_22146013_G_A	rs7519889	9.4e-33	-0.0470323	-0.0551695	-0.0388951				0.0111736	TRUE
GCST90000025	RAP1GAP	Female	Appendicular lean mass	PMID:33097823	Pei YF	2020-10-23	450243			1_22145958_C_T	rs7543136	9.958e-24	-0.021	-0.025116	-0.016884				0.0111736	TRUE
GCST90025949	RAP1GAP	Female	Height	PMID:34226706	Barton AR	2021-07-05	458235			1_22149156_T_C	rs7521775	1.7e-32	-0.0180159	-0.0210678	-0.014964				0.0111736	TRUE
NEALE2_20015_raw	RAP1GAP	Female	Sitting height		UKB Neale v2	2018-08-01	360066	0		1_22145958_C_T	rs7543136	1.64837e-53	-0.148171	-0.167027	-0.129315				0.0111736	TRUE
GCST90018739	RAP1GAP	Female	Height	PMID:34594039	Sakaue S	2021-09-30	165056			1_22113027_T_C	rs4654783	4e-09	-0.0128221	-0.0170931	-0.00855111				0.0111566	FALSE
GCST006979	RAP1GAP	Female	Heel bone mineral density	PMID:30598549	Morris JA	2018-12-31	426824			1_22120655_G_C	rs12756110	6.9e-23	-0.0392113	-0.045856	-0.0325666				0.0111493	TRUE
NEALE2_3062_raw	RAP1GAP	Female	Forced vital capacity (fvc)		UKB Neale v2	2018-08-01	329404	0		1_22119498_C_T	rs3765351	2.94e-13	-0.0134131	-0.0170157	-0.00981048				0.0111136	TRUE
NEALE2_23113_raw	RAP1GAP	Female	Leg fat-free mass (right)		UKB Neale v2	2018-08-01	354798	0		1_22163074_C_T	rs72478520	1.316e-11	0.0250825	0.0178177	0.0323473				0.0110801	TRUE
NEALE2_23114_raw	RAP1GAP	Female	Leg predicted mass (right)		UKB Neale v2	2018-08-01	354798	0		1_22163074_C_T	rs72478520	1.0723e-11	0.0236213	0.0168095	0.0304331				0.0110801	TRUE
FINNGEN_R6_CD2_BENIGN_LEIOMYOMA_UTERI_EXALLC	RAP1GAP	Female	Leiomyoma of uterus (controls excluding all cancers)		FINNGEN_R6	2022-01-24	124959	0	21518	1_22139327_T_C	rs61768001	3.58e-23				1.18155	1.14322	1.22117	0.0110737	TRUE
NEALE2_1697	RAP1GAP	Female	Comparative height size at age 10		UKB Neale v2	2018-08-01	355331	0		1_22166120_A_G	rs58670122	2.6115e-10	-0.0147229	-0.0192885	-0.0101573				0.0109893	TRUE
NEALE2_23117_raw	RAP1GAP	Female	Leg fat-free mass (left)		UKB Neale v2	2018-08-01	354771	0		1_22148932_G_T	rs7529389	1.27109e-10	-0.0186137	-0.0242869	-0.0129405				0.0109752	TRUE
NEALE2_23118_raw	RAP1GAP	Female	Leg predicted mass (left)		UKB Neale v2	2018-08-01	354766	0		1_22148932_G_T	rs7529389	1.65234e-10	-0.0173445	-0.0226639	-0.0120251				0.0109752	TRUE
GCST005350	RAP1GAP	Female	Total body bone mineral density (age 45-60)	PMID:29304378	Medina-Gomez C	2018-01-04	18805			1_22158082_T_C	rs3971300	1.583e-09	-0.0729	-0.096616	-0.049184				0.010969	TRUE
FINNGEN_R6_N14_ENDOMETRIOSIS	RAP1GAP	Female	Endometriosis		FINNGEN_R6	2022-01-24	91622	0	10029	1_22096228_G_A	rs10917151	3.7e-14				1.17578	1.1275	1.22612	0.0109674	TRUE
FINNGEN_R6_N14_ENDOMETRIOSIS_OVARY	RAP1GAP	Female	Endometriosis of ovary		FINNGEN_R6	2022-01-24	85482	0	3889	1_22096228_G_A	rs10917151	3.97e-12				1.25157	1.1747	1.33348	0.0109661	TRUE
FINNGEN_R6_N14_ENDOMETRIOSIS_ASRM_STAGE3_4	RAP1GAP	Female	Endomtriosis ASRM stages 3 4”		FINNGEN_R6	2022-01-24	147061	0	5028	1_22096228_G_A	rs10917151	1.08e-11				1.2107	1.14574	1.27934	0.0109569	TRUE
GCST90000026	RAP1GAP	Female	Appendicular lean mass	PMID:33097823	Pei YF	2020-10-23	205513			1_22145958_C_T	rs7543136	2.2e-16	-0.0245453	-0.0306905	-0.0184001				0.0109258	TRUE
NEALE2_4105_raw	RAP1GAP	Female	Heel bone mineral density (bmd) (left)		UKB Neale v2	2018-08-01	114561	0		1_22146013_G_A	rs7519889	2.0698e-11	-0.00465891	-0.00602147	-0.00329635				0.0109242	TRUE
GCST011427_439	RAP1GAP	Female	Protein quantitative trait loci (liver) [PCCB]	PMID:32778093	He B	2020-08-10	287			1_22159311_C_G	rs75730128	2e-08							0.010896	FALSE
NEALE2_50_raw	RAP1GAP	Female	Standing height		UKB Neale v2	2018-08-01	360388	0		1_22166120_A_G	rs58670122	1.55514e-18	-0.189893	-0.232254	-0.147532				0.010896	TRUE
NEALE2_4123_raw	RAP1GAP	Female	Heel quantitative ultrasound index (qui), direct entry (right)		UKB Neale v2	2018-08-01	114614	0		1_22157156_T_TG	rs11385342	5.011e-12	-0.697216	-0.895094	-0.499338				0.01076	TRUE
NEALE2_4125_raw	RAP1GAP	Female	Heel bone mineral density (bmd) t-score, automated (right)		UKB Neale v2	2018-08-01	114614	0		1_22157156_T_TG	rs11385342	5.011e-12	-0.0393617	-0.050533	-0.0281904				0.01076	TRUE
NEALE2_4124_raw	RAP1GAP	Female	Heel bone mineral density (bmd) (right)		UKB Neale v2	2018-08-01	114552	0		1_22157156_T_TG	rs11385342	7.37e-12	-0.0043521	-0.00559719	-0.00310701				0.0107242	TRUE
NEALE2_20153_raw	RAP1GAP	Female	Forced expiratory volume in 1-second (fev1), predicted		UKB Neale v2	2018-08-01	117241	0		1_22147165_T_C	rs4655026	6.639e-12	-0.00614941	-0.00790487	-0.00439395				0.01071	TRUE
NEALE2_23105_raw	RAP1GAP	Female	Basal metabolic rate		UKB Neale v2	2018-08-01	354825	0		1_22166120_A_G	rs58670122	5.4277e-11	-18.8992	-24.5469	-13.2515				0.0107036	TRUE
NEALE2_5135_raw	RAP1GAP	Female	3mm strong meridian (left)		UKB Neale v2	2018-08-01	75398	0		1_22159378_T_G	rs16826658	2.43863e-09	-0.048645	-0.0646256	-0.0326644				0.0106927	TRUE
GCST90025977	RAP1GAP	Female	Neutrophil count	PMID:34226706	Barton AR	2021-07-05	443782			1_22018600_A_G	rs3117048	3.1e-14	-0.0157186	-0.0198821	-0.0115551				0.0106909	TRUE
NEALE2_23122_raw	RAP1GAP	Female	Arm predicted mass (right)		UKB Neale v2	2018-08-01	354726	0		1_22166120_A_G	rs58670122	6.43576e-10	-0.0087663	-0.0115468	-0.00598584				0.0106735	TRUE
NEALE2_23126_raw	RAP1GAP	Female	Arm predicted mass (left)		UKB Neale v2	2018-08-01	354653	0		1_22166120_A_G	rs58670122	9.24276e-10	-0.00933044	-0.0123176	-0.0063433				0.0106735	TRUE
GCST90002398	RAP1GAP	Female	Neutrophil count	PMID:32888494	Vuckovic D	2020-09-01	408112			1_22015221_T_C	rs2501309	3.8e-18	-0.0195922	-0.0240131	-0.0151713				0.01057	TRUE
GCST90002399	RAP1GAP	Female	Neutrophil percentage of white cells	PMID:32888494	Vuckovic D	2020-09-01	408112			1_22014486_G_A	rs61778000	3.7e-13	-0.0164046	-0.0208307	-0.0119785				0.01057	TRUE
GCST90002355	RAP1GAP	Female	Neutrophil count	PMID:32888493	Chen MH	2020-09-01	627215			1_22010778_A_C	rs10917111	2e-11							0.0105146	FALSE
NEALE2_23101_raw	RAP1GAP	Female	Whole body fat-free mass		UKB Neale v2	2018-08-01	354808	0		1_22166120_A_G	rs58670122	1.53e-12	-0.152109	-0.194266	-0.109952				0.0104999	TRUE
NEALE2_23102_raw	RAP1GAP	Female	Whole body water mass		UKB Neale v2	2018-08-01	354834	0		1_22166120_A_G	rs58670122	2.043e-12	-0.111388	-0.142436	-0.0803404				0.0104999	TRUE
GCST90002351	RAP1GAP	Female	Neutrophil count	PMID:32888493	Chen MH	2020-09-01	519288			1_22008911_T_A	rs10753525	1.26e-12	0.018066	0.0130817	0.0230503				0.0104924	TRUE
GCST90025947	RAP1GAP	Female	Serum alkaline phosphatase levels	PMID:34226706	Barton AR	2021-07-05	437896			1_22007045_A_G	rs11583776	3.2e-63	-0.0881326	-0.098138	-0.0781272				0.0104924	TRUE
NEALE2_23129_raw	RAP1GAP	Female	Trunk fat-free mass		UKB Neale v2	2018-08-01	354530	0		1_22166120_A_G	rs58670122	7.5e-14	-0.0830162	-0.104769	-0.0612629				0.0104873	TRUE
NEALE2_23130_raw	RAP1GAP	Female	Trunk predicted mass		UKB Neale v2	2018-08-01	354494	0		1_22166120_A_G	rs58670122	8.9e-14	-0.0793576	-0.100217	-0.0584983				0.0104873	TRUE
GCST90025985	RAP1GAP	Female	White blood cell count	PMID:34226706	Barton AR	2021-07-05	444734			1_22018600_A_G	rs3117048	1.1e-09	-0.0123249	-0.016427	-0.00822276				0.0104681	TRUE
GCST90018968	RAP1GAP	Female	Neutrophil count	PMID:34594039	Sakaue S	2021-09-30	432666			1_22015221_T_C	rs2501309	6e-14	-0.0169	-0.0213118	-0.0124882				0.0103842	FALSE
FINNGEN_R6_N14_ENDOMETRIOSIS_ASRM_STAGE1_2	RAP1GAP	Female	Endomtriosis ASRM stages 1 2”		FINNGEN_R6	2022-01-24	147061	0	3712	1_22032296_G_T	rs61778046	4.34e-12				1.23981	1.16664	1.31758	0.0103766	TRUE
FINNGEN_R6_N14_ENDOMETRIOSIS_PELVICPERITONEUM	RAP1GAP	Female	Endometriosis of pelvic peritoneum		FINNGEN_R6	2022-01-24	85213	0	3620	1_22032296_G_T	rs61778046	4.47e-13				1.26145	1.18458	1.3433	0.0103766	TRUE
GCST90002378	RAP1GAP	Female	White blood cell count	PMID:32888493	Chen MH	2020-09-01	746667			1_22015221_T_C	rs2501309	9e-14							0.0103345	FALSE
GCST90002394	RAP1GAP	Female	Monocyte percentage of white cells	PMID:32888494	Vuckovic D	2020-09-01	408112			1_22019154_C_T	rs2501299	5.8e-17	0.0191183	0.014641	0.0235956				0.0103345	TRUE
GCST011956	CPNE5	Female	Systemic lupus erythematosus	PMID:33272962	Yin X	2020-12-03	208370		13377	6_36747254_C_CA	rs34868004	4e-09				1.104	1.06821	1.14099	0.460547	FALSE
GCST90026126	CPNE5	Female	Ascorbate (vitamin c) levels	PMID:33437055	Panyard DJ	2021-01-12	291			6_36761291_C_T	rs16889083	1.522e-10	-0.2534	-0.331016	-0.175784				0.44819	TRUE
NEALE2_30220_raw	CPNE5	Female	Basophill percentage		UKB Neale v2	2018-08-01	349861	0		6_36768325_C_A	rs236426	4.39195e-08	0.00833064	0.00534805	0.0113132				0.357785	TRUE
GCST004734	CPNE5	Female	Heart rate variability traits (SDNN)	PMID:28613276	Nolte IM	2017-06-14	27850	42258		6_36852789_A_G	rs236349	8.65e-13	-0.028247	-0.035942	-0.020552				0.356524	TRUE
NEALE2_102_raw	CPNE5	Female	Pulse rate, automated reading		UKB Neale v2	2018-08-01	340162	0		6_36852789_A_G	rs236349	1.03338e-16	0.239544	0.182986	0.296102				0.328934	TRUE
GCST004732	CPNE5	Female	Heart rate variability traits (pvRSA/HF)	PMID:28613276	Nolte IM	2017-06-14	24088	11682		6_36852789_A_G	rs236349	2.779e-12	-0.07102	-0.0928387	-0.0492013				0.319752	TRUE
GCST004733	CPNE5	Female	Heart rate variability traits (RMSSD)	PMID:28613276	Nolte IM	2017-06-14	26523	38558		6_36852789_A_G	rs236349	1.43e-08	-0.030802	-0.0413664	-0.0202376				0.253209	TRUE
GCST010011	CPNE5	Female	Help-seeking from a GP	PMID:32231276	Cai N	2020-03-30	332622		113262	6_36864327_T_C	rs236346	1e-08				0.95	0.933479	0.966813	0.242491	FALSE
GCST003818	CPNE5	Female	Resting heart rate	PMID:27798624	Eppinga RN	2016-10-31	134251	130795		6_36852789_A_G	rs236349	1e-15	0.2812	0.212537	0.349863				0.178934	FALSE
GCST005787	CPNE5	Female	Heart rate response to exercise	PMID:29769521	Ramirez J	2018-05-16	67257			6_36849337_A_G	rs236352	6e-10	-0.395	-0.520064	-0.269936				0.133601	FALSE
GCST90018970	CPNE5	Female	Pulse pressure	PMID:34594039	Sakaue S	2021-09-30	506308			6_36849337_A_G	rs236352	4e-08	-0.0104	-0.0141124	-0.00668764				0.112351	FALSE
NEALE2_20003_1141180314	CPNE5	Female	Ibandronic acid | treatment/medication code		UKB Neale v2	2018-08-01	361141	0	332	6_36478328_G_A	rs114892399	1.77019e-08				4.29698	2.58737	7.13623	0.0982915	TRUE
GCST90025949	CPNE5	Female	Height	PMID:34226706	Barton AR	2021-07-05	458235			6_36677919_A_G	rs2395655	3.1e-08	0.0090367	0.0058939	0.0121795				0.0586872	TRUE
GCST90026151	CPNE5	Female	Dimethyl sulfone levels	PMID:33437055	Panyard DJ	2021-01-12	291			6_36845159_C_G	rs77663984	2.052e-08	0.5572	0.362376	0.752024				0.0553822	TRUE
GCST006061_3	CPNE5	Female	Atrial fibrillation [EA]	PMID:29892015	Roselli C	2018-06-11	588190		65446	6_36677811_A_C	rs762624	7e-11				0.943396	0.927017	0.960065	0.0281109	FALSE
NEALE2_129_raw	CPNE5	Female	Place of birth in uk - north co-ordinate		UKB Neale v2	2018-08-01	338701	0		6_36664911_C_T	rs13196885	3.63273e-10	-1799.5	-2362.09	-1236.91				0.0263855	TRUE
GCST90002402	CPNE5	Female	Platelet count	PMID:32888494	Vuckovic D	2020-09-01	408112			6_37188830_T_C	rs1224382	1.1e-18	-0.0189988	-0.0232193	-0.0147783				0.025651	TRUE
NEALE2_3143_raw	CPNE5	Female	Ankle spacing width		UKB Neale v2	2018-08-01	206589	0		6_36678991_C_CTA	rs146170154	1.57262e-09	0.0937199	0.0632925	0.124147				0.0248911	TRUE
GCST90000061	CPNE5	Female	Pulse pressure	PMID:33230300	Surendran P	2020-11-23	810865	354096		6_36664911_C_T	rs13196885	5.657e-11	0.0102048	0.0071523	0.0132572				0.024876	TRUE
GCST90090885	CPNE5	Female	Serum levels of protein PPIL1	PMID:35078996	Gudjonsson A	2022-01-25	5361			6_36898156_C_T	rs144656078	3e-46	-0.674946	-0.767598	-0.582294				0.0242481	FALSE
GCST009240_124	CPNE5	Female	Serum metabolite levels (CMS) [XL_HDL_L]	PMID:31636271	Gallois A	2019-10-21	6263			6_36646035_T_G	rs6457931	1e-09							0.0234482	FALSE
FINNGEN_R6_CD2_BENIGN_LEIOMYOMA_UTERI	CPNE5	Female	Leiomyoma of uterus		FINNGEN_R6	2022-01-24	147061	0	21518	6_36659706_C_T	rs6920453	3.43e-10				0.907874	0.880888	0.935686	0.0232486	TRUE
GCST011202	CPNE5	Female	Dilated cardiomyopathy (MTAG)	PMID:33495596	Tadros R	2021-01-25	402844		5521	6_36665292_A_G	rs4713999	7e-14				1.11008	1.08014	1.14084	0.0230274	FALSE
GCST005194	CPNE5	Female	Coronary artery disease	PMID:29212778	van der Harst P	2017-12-06	296525	250736	34541	6_36670859_G_A	rs1321309	3.484e-08				1.0284	1.01817	1.03873	0.0228486	TRUE
GCST90018806	CPNE5	Female	Chronic heart failure	PMID:34594039	Sakaue S	2021-09-30	664886		24802	6_36665292_A_G	rs4713999	1e-12	0.0755	0.0547469	0.0962531				0.0228098	FALSE
GCST003871	CPNE5	Female	QRS complex (Cornell) [EA]	PMID:27659466	van der Harst P	2016-09-27	58862	21485		6_36655602_G_A	rs9470361	2e-09							0.0216585	FALSE
GCST011217	CPNE5	Female	Left ventricular global circumferential strain	PMID:33495596	Tadros R	2021-01-25	19260			6_36661176_G_A	rs9462210	8e-10	-0.2272	-0.299668	-0.154732				0.0215876	FALSE
GCST90025969	CPNE5	Female	Hemoglobin levels	PMID:34226706	Barton AR	2021-07-05	445373			6_37071788_C_T	rs7748291	1.2e-20	-0.0181983	-0.0220543	-0.0143423				0.0215836	TRUE
GCST011211	CPNE5	Female	Hypertrophic cardiomyopathy	PMID:33495596	Tadros R	2021-01-25	8361	50180	1733	6_36668303_T_C	rs66761782	3e-15				1.24616	1.17987	1.31617	0.0214088	FALSE
GCST007104	CPNE5	Female	QRS duration	PMID:30012220	Prins BP	2018-07-17	85593	111874		6_36655602_G_A	rs9470361	2e-89	0.764631	0.689886	0.839376				0.0212748	FALSE
GCST000561_5	CPNE5	Female	Electrocardiographic traits [QRS duration]	PMID:20062063	Holm H	2010-01-10	12670	10352		6_36655123_C_A	rs1321311	3e-10	6.52	4.49116	8.54884				0.0211045	FALSE
GCST001893	CPNE5	Female	Electrocardiographic conduction measures [QRS duration - CHARGE]	PMID:23463857	Ritchie MD	2013-03-05	5272	40407		6_36651044_C_T	rs1321313	5e-25	0.8129	0.658705	0.967095				0.0209984	FALSE
GCST007992	CPNE5	Female	Colorectal cancer	PMID:31089142	Law PJ	2019-05-14	92967		31197	6_36655347_T_C	rs1321310	6e-11				1.09	1.06222	1.1185	0.0209984	FALSE
FINNGEN_R6_CD2_BENIGN_LEIOMYOMA_UTERI_EXALLC	CPNE5	Female	Leiomyoma of uterus (controls excluding all cancers)		FINNGEN_R6	2022-01-24	124959	0	21518	6_36659706_C_T	rs6920453	1.24e-09				0.906894	0.878744	0.935945	0.0207744	TRUE
GCST003871	CPNE5	Female	QRS complex (Cornell) [EA]	PMID:27659466	van der Harst P	2016-09-27	58862	21485		6_36655123_C_A	rs1321311	1e-09							0.0207743	FALSE
GCST90018934	CPNE5	Female	Uterine fibroids	PMID:34594039	Sakaue S	2021-09-30	338926		35499	6_36652722_C_G	rs10947616	6e-13							0.0205586	FALSE
GCST90002355	CPNE5	Female	Neutrophil count	PMID:32888493	Chen MH	2020-09-01	627215			6_36670859_G_A	rs1321309	4e-18							0.020349	FALSE
GCST90002378	CPNE5	Female	White blood cell count	PMID:32888493	Chen MH	2020-09-01	746667			6_36670914_A_C	rs1321308	1e-18							0.020349	FALSE
GCST004615	CPNE5	Female	Hemoglobin concentration	PMID:27863252	Astle WJ	2016-11-17	172925			6_37088160_AT_A	rs1030242633	1.038e-08	-0.0211986	-0.0284569	-0.0139402				0.0201267	TRUE
GCST007069	CPNE5	Female	Red blood cell count	PMID:30595370	Kichaev G	2018-12-27	445000			6_37079688_T_G	rs9462258	7e-17							0.0200251	FALSE
GCST90025952	CPNE5	Female	Apolipoprotein B levels	PMID:34226706	Barton AR	2021-07-05	435744			6_37071788_C_T	rs7748291	9.9e-10	-0.0115557	-0.015531	-0.00758039				0.0199802	TRUE
GCST90025953	CPNE5	Female	Total cholesterol levels	PMID:34226706	Barton AR	2021-07-05	437878			6_37071788_C_T	rs7748291	4.8e-13	-0.0143611	-0.0183899	-0.0103323				0.0199802	TRUE
GCST90025954	CPNE5	Female	Direct low density lipoprotein cholesterol levels	PMID:34226706	Barton AR	2021-07-05	437068			6_37071788_C_T	rs7748291	7e-10	-0.0119455	-0.0159836	-0.00790743				0.0199802	TRUE
GCST90025964	CPNE5	Female	Red blood cell count	PMID:34226706	Barton AR	2021-07-05	445305			6_37071788_C_T	rs7748291	4.8e-16	-0.0154231	-0.0191205	-0.0117257				0.0199802	TRUE
GCST90010359_2	CPNE5	Female	QT dynamics during exercise [female]	PMID:32527199	van Duijvenboden S	2020-06-11	52861			6_36655123_C_A	rs1321311	7e-11	-0.0576133	-0.0749309	-0.0402957				0.0198787	FALSE
GCST011205	CPNE5	Female	Hypertrophic cardiomyopathy (MTAG)	PMID:33495596	Tadros R	2021-01-25	8361		1733	6_36668303_T_C	rs66761782	2e-19				1.2884	1.21932	1.36139	0.0198306	FALSE
GCST90002340	CPNE5	Female	Monocyte count	PMID:32888493	Chen MH	2020-09-01	521594			6_36696375_C_T	rs74865188	1.83e-09	-0.01962	-0.0260116	-0.0132284				0.018486	TRUE
GCST90000025	CPNE5	Female	Appendicular lean mass	PMID:33097823	Pei YF	2020-10-23	450243			6_36680498_C_CAGAG		4.668e-09	0.0114	0.007676	0.015124				0.018467	TRUE
GCST90002363	CPNE5	Female	Red blood cell count	PMID:32888493	Chen MH	2020-09-01	545203			6_37061908_A_C	rs9296208	7.58e-20	-0.016821	-0.0204333	-0.0132087				0.0183978	TRUE
GCST90002374	CPNE5	Female	White blood cell count	PMID:32888493	Chen MH	2020-09-01	562243			6_36670914_A_C	rs1321308	4.76e-19	0.016476	0.0128578	0.0200942				0.0183857	TRUE
GCST90002351	CPNE5	Female	Neutrophil count	PMID:32888493	Chen MH	2020-09-01	519288			6_36670859_G_A	rs1321309	9.27e-20	0.017505	0.0137359	0.0212741				0.0182591	TRUE
GCST90002385	CPNE5	Female	High light scatter reticulocyte count	PMID:32888494	Vuckovic D	2020-09-01	408112			6_37084836_C_G	rs7751821	4.1e-08	-0.0117444	-0.0159384	-0.00755039				0.0182281	TRUE
GCST90002407	CPNE5	Female	White blood cell count	PMID:32888494	Vuckovic D	2020-09-01	408112			6_36680498_C_CAGAG		2.4e-13	-0.0160333	-0.0203252	-0.0117414				0.0181797	TRUE
GCST001544	CPNE5	Female	Colorectal cancer	PMID:22634755	Dunlop MG	2012-05-27	17780	40651	8323	6_36655123_C_A	rs1321311	1e-10							0.0180025	FALSE
GCST90002367	CPNE5	Female	Red blood cell count	PMID:32888493	Chen MH	2020-09-01	727624			6_37061908_A_C	rs9296208	2e-17							0.0179017	FALSE
GCST90002403	CPNE5	Female	Red blood cell count	PMID:32888494	Vuckovic D	2020-09-01	408112			6_37059456_C_T	rs9366927	4.7e-20	-0.0191937	-0.0232958	-0.0150916				0.0178455	TRUE
GCST90025956	CPNE5	Female	HDL cholesterol levels	PMID:34226706	Barton AR	2021-07-05	400754			6_36679011_A_G	rs3176320	7e-11	0.0120725	0.0079322	0.0162128				0.0177344	TRUE
GCST90012110	CPNE5	Female	Sex hormone-binding globulin levels adjusted for BMI	PMID:32042192	Ruth KS	2020-02-10	368929			6_37153683_T_G	rs1766692	4.4e-09	-0.00518682	-0.00701386	-0.00335978				0.0176451	TRUE
GCST010918	CPNE5	Female	JT interval	PMID:29874175	Bihlmeyer NA	2018-01-01	95626			6_36655602_G_A	rs9470361	2e-15							0.017571	FALSE
GCST006614	CPNE5	Female	Total cholesterol levels	PMID:30275531	Klarin D	2018-10-01	297626	319677		6_37070656_A_G	rs913499	9e-12	-0.0146	-0.0187949	-0.0104051				0.0174	FALSE
NEALE2_30010_raw	CPNE5	Female	Red blood cell (erythrocyte) count		UKB Neale v2	2018-08-01	350475	0		6_37059456_C_T	rs9366927	2.232e-12	-0.00587677	-0.00751772	-0.00423582				0.0170616	TRUE
GCST90010359	CPNE5	Female	QT dynamics during exercise	PMID:32527199	van Duijvenboden S	2020-06-11	52861			6_36655123_C_A	rs1321311	2e-13	-0.045	-0.057002	-0.032998				0.01705	FALSE
GCST90002314	CPNE5	Female	Hemoglobin concentration	PMID:32888493	Chen MH	2020-09-01	746431			6_37059456_C_T	rs9366927	2e-25							0.0169764	FALSE
NEALE2_20015_raw	CPNE5	Female	Sitting height		UKB Neale v2	2018-08-01	360066	0		6_36249383_G_A	rs4713940	2.12789e-20	-0.0984866	-0.119341	-0.0776322				0.01688	TRUE
GCST90000025	CPNE5	Female	Appendicular lean mass	PMID:33097823	Pei YF	2020-10-23	450243			6_36249383_G_A	rs4713940	1.7e-14	-0.0179	-0.022408	-0.013392				0.016516	TRUE
NEALE2_50_raw	CPNE5	Female	Standing height		UKB Neale v2	2018-08-01	360388	0		6_36249383_G_A	rs4713940	1.01642e-26	-0.196998	-0.23308	-0.160916				0.016516	TRUE
GCST90025970	CPNE5	Female	High light scatter reticulocyte count	PMID:34226706	Barton AR	2021-07-05	437723			6_37071788_C_T	rs7748291	5.4e-10	-0.0109623	-0.0147912	-0.0071334				0.0164766	TRUE
GCST010243	CPNE5	Female	Apolipoprotein B levels	PMID:32203549	Richardson TG	2020-03-23	439214			6_37070656_A_G	rs913499	5e-09	-0.0121773	-0.0162592	-0.00809541				0.0163377	FALSE
GCST010245	CPNE5	Female	LDL cholesterol levels	PMID:32203549	Richardson TG	2020-03-23	440546			6_37070656_A_G	rs913499	1e-08	-0.0119766	-0.0160728	-0.00788041				0.0163377	FALSE
NEALE2_23129_raw	CPNE5	Female	Trunk fat-free mass		UKB Neale v2	2018-08-01	354530	0		6_36249383_G_A	rs4713940	4e-15	-0.0742365	-0.0927727	-0.0557003				0.016324	TRUE
GCST90002394	CPNE5	Female	Monocyte percentage of white cells	PMID:32888494	Vuckovic D	2020-09-01	408112			6_37086900_A_G	rs4711483	7.9e-17	-0.0177541	-0.0219302	-0.013578				0.0163219	TRUE
GCST010204	CPNE5	Female	Low density lipoprotein cholesterol levels	PMID:32154731	Ripatti P	2020-03-10	324708			6_37070656_A_G	rs913499	5e-11							0.0162488	FALSE
GCST90019512	CPNE5	Female	Low density lipoprotein cholesterol levels	PMID:33462484	Sinnott-Armstrong N	2021-01-18	355197			6_37062979_T_C	rs6457976	1e-09	-0.0145	-0.0191518	-0.00984816				0.0161827	FALSE
GCST003844	CPNE5	Female	QRS duration [EA]	PMID:27659466	van der Harst P	2016-09-27	60255	21485		6_36655123_C_A	rs1321311	1e-37							0.0161399	FALSE
GCST90025946	CPNE5	Female	Creatinine levels	PMID:34226706	Barton AR	2021-07-05	437660			6_37095578_G_A	rs9296212	7.7e-11	0.0136845	0.00959823	0.0177708				0.0160725	TRUE
NEALE2_30020_raw	CPNE5	Female	Haemoglobin concentration		UKB Neale v2	2018-08-01	350474	0		6_37059456_C_T	rs9366927	1.98907e-16	-0.0192521	-0.0238409	-0.0146633				0.0160643	TRUE
NEALE2_30030_raw	CPNE5	Female	Haematocrit percentage		UKB Neale v2	2018-08-01	350475	0		6_37059456_C_T	rs9366927	6.03747e-18	-0.0595906	-0.0731209	-0.0460603				0.0160643	TRUE
GCST000872	CPNE5	Female	QRS duration	PMID:21076409	Sotoodehnia N	2010-11-14	40407	7170		6_36655602_G_A	rs9470361	3e-27	0.87	0.712295	1.0277				0.0159958	FALSE
GCST90018960	CPNE5	Female	Hematocrit	PMID:34594039	Sakaue S	2021-09-30	503490			6_37059456_C_T	rs9366927	2e-20	-0.017	-0.0205974	-0.0134026				0.0159534	FALSE
GCST003598_3	CPNE5	Female	QRS duration [European]	PMID:27577874	Evans DS	2016-08-29	53438			6_36659276_A_G	rs7756236	2e-26	0.83	0.677065	0.982935				0.0158619	FALSE
GCST003598	CPNE5	Female	QRS duration	PMID:27577874	Evans DS	2016-08-29	53438			6_36659276_A_G	rs7756236	6e-29	0.75	0.618347	0.881653				0.0157585	FALSE
GCST90002308	CPNE5	Female	Hematocrit	PMID:32888493	Chen MH	2020-09-01	737823			6_37059456_C_T	rs9366927	3e-30							0.0154256	FALSE
FINNGEN_R6_DM_PERIPHATHERO	CPNE5	Female	Peripheral atherosclerosis		FINNGEN_R6	2022-01-24	199229	0	8393	6_36676721_T_C	rs3829964	4.02e-08				0.903535	0.871399	0.936857	0.014732	TRUE
NEALE2_30190_raw	CPNE5	Female	Monocyte percentage		UKB Neale v2	2018-08-01	349861	0		6_37088160_AT_A	rs1030242633	8.83818e-10	-0.0406251	-0.0536161	-0.0276341				0.0147266	TRUE
GCST010244	CPNE5	Female	Triglyceride levels	PMID:32203549	Richardson TG	2020-03-23	441016			6_36670398_G_A	rs4714001	4e-09	0.0121275	0.00808788	0.0161671				0.0144761	FALSE
GCST009541	CPNE5	Female	Heart failure	PMID:31919418	Shah S	2020-01-09	977323		47309	6_36679903_T_C	rs4135240	6.838e-09				0.952562	0.937007	0.968375	0.0144029	TRUE
GCST90002334	CPNE5	Female	Mean corpuscular volume	PMID:32888493	Chen MH	2020-09-01	544127			6_36532930_G_A	rs141790977	8e-11	0.070872	0.0495198	0.0922242				0.0143033	TRUE
GCST90013405	CPNE5	Female	Liver enzyme levels (alanine transaminase)	PMID:33972514	Pazoki R	2021-05-10	437267	315572		6_36670398_G_A	rs4714001	1.2e-09	0.00243617	0.00164152	0.00323082				0.0142568	TRUE
NEALE2_23126_raw	CPNE5	Female	Arm predicted mass (left)		UKB Neale v2	2018-08-01	354653	0		6_36294108_A_G	rs4713949	5.56108e-10	0.0152705	0.0104451	0.0200959				0.0137799	TRUE
NEALE2_23130_raw	CPNE5	Female	Trunk predicted mass		UKB Neale v2	2018-08-01	354494	0		6_36294108_A_G	rs4713949	1.9146e-11	0.115408	0.0817103	0.149106				0.0137799	TRUE
GCST007103	CPNE5	Female	QRS duration	PMID:30012220	Prins BP	2018-07-17	77898			6_36655602_G_A	rs9470361	4e-63	0.884052	0.780732	0.987372				0.0136911	FALSE
GCST90018971	CPNE5	Female	Red blood cell count	PMID:34594039	Sakaue S	2021-09-30	503987			6_37059456_C_T	rs9366927	2e-13	-0.014	-0.0177339	-0.0102661				0.0134477	FALSE
GCST90018974	CPNE5	Female	Total cholesterol levels	PMID:34594039	Sakaue S	2021-09-30	480086			6_37059924_A_G	rs7750403	1e-08	-0.0123	-0.0165068	-0.00809321				0.0132718	FALSE
GCST90025949	CPNE5	Female	Height	PMID:34226706	Barton AR	2021-07-05	458235			6_37071788_C_T	rs7748291	2.2e-08	0.00877558	0.00573917	0.011812				0.0131462	TRUE
NEALE2_30030_raw	CPNE5	Female	Haematocrit percentage		UKB Neale v2	2018-08-01	350475	0		6_36604563_G_A	rs10947613	7.16287e-10	-0.0469314	-0.0618578	-0.032005				0.0129557	TRUE
GCST010796_203	CPNE5	Female	Electrocardiogram morphology (amplitude at temporal datapoints) [160 ms]	PMID:32916098	Verweij N	2020-09-02	63706			6_36678191_G_C	rs730506	4e-08							0.0127864	FALSE
GCST90093369	CPNE5	Female	Ascending aorta maximum area	PMID:34968759	Benjamins JW	2021-12-27	31908			6_36678211_G_C	rs4151702	3e-08							0.0127864	FALSE
GCST90018796	CPNE5	Female	Atrial fibrillation/atrial flutter	PMID:34594039	Sakaue S	2021-09-30	589441		33362	6_36678191_G_C	rs730506	1e-08							0.0127491	FALSE
GCST90025977	CPNE5	Female	Neutrophil count	PMID:34226706	Barton AR	2021-07-05	443782			6_36677919_A_G	rs2395655	1.3e-14	-0.0155911	-0.0196565	-0.0115257				0.012698	TRUE
GCST90025957	CPNE5	Female	Triglyceride levels	PMID:34226706	Barton AR	2021-07-05	437532			6_36679011_A_G	rs3176320	2.4e-11	-0.0142506	-0.0183862	-0.010115				0.0126252	TRUE
GCST90025958	CPNE5	Female	Sex hormone-binding globulin levels	PMID:34226706	Barton AR	2021-07-05	397043			6_36679011_A_G	rs3176320	1.1e-14	0.0156253	0.0114146	0.019836				0.0126252	TRUE
GCST90025980	CPNE5	Female	Aspartate aminotransferase levels	PMID:34226706	Barton AR	2021-07-05	436275			6_36679011_A_G	rs3176320	2e-11	-0.0143386	-0.0186295	-0.0100477				0.0126252	TRUE
GCST90002351	CPNE5	Female	Neutrophil count	PMID:32888493	Chen MH	2020-09-01	519288			6_37049763_A_G	rs56693599	3.03e-10	0.023211	0.0159923	0.0304297				0.0125498	TRUE
GCST90025985	CPNE5	Female	White blood cell count	PMID:34226706	Barton AR	2021-07-05	444734			6_36677919_A_G	rs2395655	3.6e-12	-0.0138096	-0.017814	-0.00980516				0.0124484	TRUE
GCST90025989	CPNE5	Female	Insulin-like growth factor 1 levels	PMID:34226706	Barton AR	2021-07-05	435516			6_36677919_A_G	rs2395655	6.7e-10	-0.0127545	-0.0167401	-0.00876886				0.0124484	TRUE
GCST007227	CPNE5	Female	QRS duration	PMID:30679814	van Setten J	2019-01-24	25509	34180		6_36679512_G_A	rs3176326	4e-25	1.177	0.954202	1.3998				0.012443	FALSE
GCST010796_168	CPNE5	Female	Electrocardiogram morphology (amplitude at temporal datapoints) [0 ms]	PMID:32916098	Verweij N	2020-09-02	63706			6_36678191_G_C	rs730506	2e-24							0.012443	FALSE
GCST010796_224	CPNE5	Female	Electrocardiogram morphology (amplitude at temporal datapoints) [2 ms]	PMID:32916098	Verweij N	2020-09-02	63706			6_36678191_G_C	rs730506	2e-22							0.012443	FALSE
GCST010796_55	CPNE5	Female	Electrocardiogram morphology (amplitude at temporal datapoints) [-2 ms]	PMID:32916098	Verweij N	2020-09-02	63706			6_36678191_G_C	rs730506	8e-24							0.012443	FALSE
GCST012099	CPNE5	Female	Hypertrophic cardiomyopathy (sarcomere negative)	PMID:33495597	Harper AR	2021-01-25	27774		1874	6_36679512_G_A	rs3176326	1e-08	0.255251	0.167951	0.342551				0.0123637	FALSE
GCST90002304	CPNE5	Female	Hematocrit	PMID:32888493	Chen MH	2020-09-01	562259			6_37059456_C_T	rs9366927	8.09e-32	-0.021734	-0.02536	-0.018108				0.0123595	TRUE
GCST90002310	CPNE5	Female	Hemoglobin concentration	PMID:32888493	Chen MH	2020-09-01	563946			6_37059456_C_T	rs9366927	1.18e-26	-0.019726	-0.0233422	-0.0161098				0.0123595	TRUE
GCST90002383	CPNE5	Female	Hematocrit	PMID:32888494	Vuckovic D	2020-09-01	408112			6_37059456_C_T	rs9366927	4.4e-27	-0.0230296	-0.0272176	-0.0188416				0.0123595	TRUE
GCST90002384	CPNE5	Female	Hemoglobin	PMID:32888494	Vuckovic D	2020-09-01	408112			6_37059456_C_T	rs9366927	6.9e-25	-0.022003	-0.0261892	-0.0178168				0.0123595	TRUE
GCST90018967	CPNE5	Female	Monocyte count	PMID:34594039	Sakaue S	2021-09-30	444975			6_37041458_G_A	rs7748197	2e-11	-0.0147	-0.0189964	-0.0104036				0.0121847	FALSE
GCST90025974	CPNE5	Female	Hemoglobin A1c levels	PMID:34226706	Barton AR	2021-07-05	437749			6_36677919_A_G	rs2395655	6.9e-12	-0.013031	-0.0169888	-0.00907321				0.012143	TRUE
FINNGEN_R6_I9_HEARTFAIL	CPNE5	Female	Heart failure strict”		FINNGEN_R6	2022-01-24	245784	0	15838	6_36679072_T_C	rs3176323	3.51e-10				0.912899	0.887278	0.93926	0.0121411	TRUE
GCST010796_98	CPNE5	Female	Electrocardiogram morphology (amplitude at temporal datapoints) [-4 ms]	PMID:32916098	Verweij N	2020-09-02	63706			6_36678191_G_C	rs730506	3e-21							0.0121245	FALSE
GCST90025979	CPNE5	Female	Alanine aminotransferase levels	PMID:34226706	Barton AR	2021-07-05	437724			6_36679011_A_G	rs3176320	8e-12	-0.0148245	-0.0191318	-0.0105172				0.0121147	TRUE
GCST90012111	CPNE5	Female	Sex hormone-binding globulin levels	PMID:32042192	Ruth KS	2020-02-10	370125			6_36670398_G_A	rs4714001	2.8e-10	-0.00582628	-0.00773191	-0.00392065				0.0121057	TRUE
GCST006414	CPNE5	Female	Atrial fibrillation	PMID:30061737	Nielsen JB	2018-07-30	1030836		60620	6_36679512_G_A	rs3176326	1.42e-13				0.939319	0.9238	0.955099	0.0120602	TRUE
GCST90012110	CPNE5	Female	Sex hormone-binding globulin levels adjusted for BMI	PMID:32042192	Ruth KS	2020-02-10	368929			6_36679903_T_C	rs4135240	3e-15	0.00653342	0.00477581	0.00829103				0.0119986	TRUE
NEALE2_12340_raw	CPNE5	Female	Qrs duration		UKB Neale v2	2018-08-01	10815	0		6_36679072_T_C	rs3176323	1.0783e-11	1.31464	0.935886	1.69339				0.0119576	TRUE
GCST90002412	CPNE5	Female	Low density lipoprotein cholesterol levels	PMID:32493714	Klimentidis YC	2020-06-03	431167			6_37070656_A_G	rs913499	3e-17	-0.0161536	-0.0199014	-0.0124058				0.0119156	TRUE
GCST90018943	CPNE5	Female	Alanine aminotransferase levels	PMID:34594039	Sakaue S	2021-09-30	494681			6_36690315_C_T	rs7761648	2e-08	0.0154	0.0100215	0.0207785				0.0118382	FALSE
GCST90018954	CPNE5	Female	Gamma glutamyl transpeptidase	PMID:34594039	Sakaue S	2021-09-30	477575			6_36685820_C_T	rs1059234	6e-09	0.0161	0.010675	0.021525				0.0118382	FALSE
GCST010321	CPNE5	Female	PR interval	PMID:32439900	Ntalla I	2020-05-21	292566			6_36678191_G_C	rs730506	7e-15							0.0118355	FALSE
FINNGEN_R6_I9_AF	CPNE5	Female	Atrial fibrillation and flutter		FINNGEN_R6	2022-01-24	164491	0	28670	6_36679072_T_C	rs3176323	1.93e-11				0.905598	0.879748	0.932207	0.0117967	TRUE
GCST90002363	CPNE5	Female	Red blood cell count	PMID:32888493	Chen MH	2020-09-01	545203			6_36639319_A_G	rs78968184	1.49e-09	-0.030544	-0.04044	-0.020648				0.0117934	TRUE
GCST011010	CPNE5	Female	Electrocardiographic traits (multivariate)	PMID:32602732	Baldassari AR	2020-06-30	36345			6_36679512_G_A	rs3176326	1e-11							0.0117675	FALSE
GCST012101	CPNE5	Female	Hypertrophic cardiomyopathy	PMID:33495597	Harper AR	2021-01-25	50266	8271	2780	6_36679512_G_A	rs3176326	2e-11	0.247	0.174808	0.319192				0.0117675	FALSE
FINNGEN_R6_I9_AF_REIMB	CPNE5	Female	Atrial fibrillation and flutter with reimbursement		FINNGEN_R6	2022-01-24	151077	0	15256	6_36679072_T_C	rs3176323	2.69e-09				0.897197	0.865699	0.92984	0.0117622	TRUE
GCST90038637	CPNE5	Female	Hypothyroidism or myxedema	PMID:33959723	Donertas HM	2021-04-08	484598		23497	6_37010969_G_A	rs1724088	1.7e-08				1.00268	1.00175	1.00361	0.0117298	TRUE
GCST006629	CPNE5	Female	Pulse pressure	PMID:30224653	Evangelou E	2018-09-17	757601	249262		6_36681039_A_T	rs3176336	3e-18							0.0117296	FALSE
GCST010796_146	CPNE5	Female	Electrocardiogram morphology (amplitude at temporal datapoints) [-6 ms]	PMID:32916098	Verweij N	2020-09-02	63706			6_36678191_G_C	rs730506	2e-17							0.0117134	FALSE
GCST010796_334	CPNE5	Female	Electrocardiogram morphology (amplitude at temporal datapoints) [4 ms]	PMID:32916098	Verweij N	2020-09-02	63706			6_36678191_G_C	rs730506	7e-17							0.0117134	FALSE
SAIGE_728_71	CPNE5	Female	Contracture of palmar fascia [dupuytren's disease]		UKB SAIGE	2018-10-24	382214	0	3503	6_36680587_T_C	rs3176334	2.98e-09				1.17	1.11078	1.23237	0.0116846	TRUE
FINNGEN_R6_CARDIAC_ARRHYTM	CPNE5	Female	Cardiac arrhytmias		FINNGEN_R6	2022-01-24	203162	0	41150	6_36679072_T_C	rs3176323	1.24e-13				0.923366	0.904103	0.943039	0.011672	TRUE
GCST008054	CPNE5	Female	QRS duration	PMID:31217584	Wojcik GL	2019-06-19	17046			6_36678991_C_CTA	rs146170154	5e-20							0.0116462	FALSE
GCST008054_3	CPNE5	Female	QRS duration [Hispanic/Latino]	PMID:31217584	Wojcik GL	2019-06-19	17046			6_36678991_C_CTA	rs146170154	1e-18							0.0116462	FALSE
GCST008422	CPNE5	Female	QRS duration	PMID:31251759	Swenson BR	2019-06-28	15124			6_36679512_G_A	rs3176326	2e-19	1.15	0.899924	1.40008				0.0116462	FALSE
GCST90013664	CPNE5	Female	Aspartate aminotransferase levels	PMID:34315874	Ward LD	2021-07-27	406934			6_36679011_A_G	rs3176320	1e-10							0.0116287	FALSE
GCST90018957	CPNE5	Female	Hemoglobin	PMID:34594039	Sakaue S	2021-09-30	502921			6_37059456_C_T	rs9366927	2e-18	-0.0156	-0.0190915	-0.0121085				0.0116266	FALSE
GCST90002398	CPNE5	Female	Neutrophil count	PMID:32888494	Vuckovic D	2020-09-01	408112			6_36680498_C_CAGAG		2.7e-14	-0.0168556	-0.0211964	-0.0125148				0.0115979	TRUE
GCST010796	CPNE5	Female	Electrocardiogram morphology (amplitude at temporal datapoints) [-10 ms]	PMID:32916098	Verweij N	2020-09-02	63706			6_36678191_G_C	rs730506	1e-08							0.0115743	FALSE
GCST010796_187	CPNE5	Female	Electrocardiogram morphology (amplitude at temporal datapoints) [132 ms]	PMID:32916098	Verweij N	2020-09-02	63706			6_36678191_G_C	rs730506	3e-09							0.0115743	FALSE
GCST010796_190	CPNE5	Female	Electrocardiogram morphology (amplitude at temporal datapoints) [138 ms]	PMID:32916098	Verweij N	2020-09-02	63706			6_36678191_G_C	rs730506	2e-08							0.0115743	FALSE
GCST90013663	CPNE5	Female	Alanine aminotransferase levels	PMID:34315874	Ward LD	2021-07-27	408300			6_36679011_A_G	rs3176320	4e-10							0.0115207	FALSE
GCST90000292	CPNE5	Female	Myocardial fractal dimension (slice 6)	PMID:32814899	Meyer HV	2020-08-19	18096			6_36679512_G_A	rs3176326	3.1492e-08	-0.0034981	-0.00473674	-0.00225946				0.0114614	TRUE
GCST010796_199	CPNE5	Female	Electrocardiogram morphology (amplitude at temporal datapoints) [154 ms]	PMID:32916098	Verweij N	2020-09-02	63706			6_36678191_G_C	rs730506	3e-10							0.011452	FALSE
GCST90002310	CPNE5	Female	Hemoglobin concentration	PMID:32888493	Chen MH	2020-09-01	563946			6_36588027_A_T	rs200290898	6.77e-11	-0.016633	-0.0216251	-0.0116409				0.0114356	TRUE
GCST90011899	CPNE5	Female	Aspartate aminotransferase levels	PMID:33547301	Chen VL	2021-02-05	389565	134182		6_36679903_T_C	rs4135240	1e-10	-6.44	-8.39183	-4.48817				0.011427	FALSE
GCST90018944	CPNE5	Female	Aspartate aminotransferase levels	PMID:34594039	Sakaue S	2021-09-30	493058			6_36680587_T_C	rs3176334	2e-10	-0.0133	-0.0173979	-0.00920212				0.011427	FALSE
GCST90011898	CPNE5	Female	Alanine aminotransferase levels	PMID:33547301	Chen VL	2021-02-05	390812	134154		6_36680587_T_C	rs3176334	1e-08	-5.69	-7.63607	-3.74393				0.0114256	FALSE
GCST90000293	CPNE5	Female	Myocardial fractal dimension (slice 7)	PMID:32814899	Meyer HV	2020-08-19	18096			6_36679512_G_A	rs3176326	1.12512e-09	-0.0042929	-0.00567366	-0.00291214				0.0113858	TRUE
GCST010796_198	CPNE5	Female	Electrocardiogram morphology (amplitude at temporal datapoints) [152 ms]	PMID:32916098	Verweij N	2020-09-02	63706			6_36678191_G_C	rs730506	1e-10							0.0113652	FALSE
GCST010796_388	CPNE5	Female	Electrocardiogram morphology (amplitude at temporal datapoints) [6 ms]	PMID:32916098	Verweij N	2020-09-02	63706			6_36678191_G_C	rs730506	9e-10							0.0113526	FALSE
GCST90011770	CPNE5	Female	Glaucoma (primary open-angle)	PMID:33627673	Gharahkhani P	2021-02-24	383500	1514372	34179	6_36602589_T_C	rs7344	2e-12	0.0599	0.0432102	0.0765898				0.0113283	FALSE
GCST010320	CPNE5	Female	PR interval	PMID:32439900	Ntalla I	2020-05-21	271570			6_36679512_G_A	rs3176326	1e-12	0.5993	0.434567	0.764033				0.0113041	FALSE
GCST006061	CPNE5	Female	Atrial fibrillation	PMID:29892015	Roselli C	2018-06-11	588190		65446	6_36679512_G_A	rs3176326	8e-11				0.943396	0.926967	0.960117	0.0112369	FALSE
GCST010796_195	CPNE5	Female	Electrocardiogram morphology (amplitude at temporal datapoints) [146 ms]	PMID:32916098	Verweij N	2020-09-02	63706			6_36678191_G_C	rs730506	6e-12							0.0112369	FALSE
GCST010796_197	CPNE5	Female	Electrocardiogram morphology (amplitude at temporal datapoints) [150 ms]	PMID:32916098	Verweij N	2020-09-02	63706			6_36678191_G_C	rs730506	8e-12							0.0112369	FALSE
GCST010557	CPNE5	Female	Type 2 diabetes	PMID:32541925	Vujkovic M	2020-06-15	1407282		228499	6_36943498_G_A	rs72846863	5e-08	-0.0335	-0.0455448	-0.0214552				0.0112266	FALSE
GCST011439	CPNE5	Female	Glaucoma (primary open-angle)	PMID:33627673	Gharahkhani P	2021-02-24	136393		10925	6_36591187_T_C	rs9394363	3e-08				1.09702	1.06167	1.13355	0.0112101	FALSE
GCST010796_196	CPNE5	Female	Electrocardiogram morphology (amplitude at temporal datapoints) [148 ms]	PMID:32916098	Verweij N	2020-09-02	63706			6_36678191_G_C	rs730506	2e-12							0.0111433	FALSE
GCST007068	CPNE5	Female	Mean corpuscular hemoglobin	PMID:30595370	Kichaev G	2018-12-27	443000			6_36591187_T_C	rs9394363	3e-09							0.0111307	FALSE
GCST007269	CPNE5	Female	Pulse pressure	PMID:30578418	Giri A	2018-12-21	459777	316301		6_36681039_A_T	rs3176336	4e-16							0.0111267	FALSE
GCST007070	CPNE5	Female	White blood cell count	PMID:30595370	Kichaev G	2018-12-27	444000			6_36681039_A_T	rs3176336	8e-13							0.0109455	FALSE
GCST009723	CPNE5	Female	Vertical cup-disc ratio (adjusted for vertical disc diameter)	PMID:31959993	Craig JE	2020-01-20	67040			6_36620363_C_T	rs12211825	4e-12	0.00748	0.00536663	0.00959337				0.0109209	FALSE
GCST008362	CPNE5	Female	Birth weight	PMID:31043758	Warrington NM	2019-05-01	321223			6_37138117_A_G	rs2395668	1e-08	-0.020086	-0.0269557	-0.0132163				0.0109024	FALSE
GCST90002304	CPNE5	Female	Hematocrit	PMID:32888493	Chen MH	2020-09-01	562259			6_36629007_T_C	rs12197590	1.48e-13	-0.015948	-0.0201757	-0.0117203				0.0108838	TRUE
GCST011496	CPNE5	Female	Abdominal aortic aneurysm	PMID:32981348	Klarin D	2020-09-28	179814	104830	7642	6_36681039_A_T	rs3176336	1e-10							0.0108696	FALSE
GCST90002390	CPNE5	Female	Mean corpuscular hemoglobin	PMID:32888494	Vuckovic D	2020-09-01	408112			6_36532930_G_A	rs141790977	5.6e-09	0.0711454	0.0472252	0.0950656				0.010845	TRUE
GCST006613	CPNE5	Female	Triglycerides	PMID:30275531	Klarin D	2018-10-01	297626	319677		6_36677919_A_G	rs2395655	7e-12	-0.0147	-0.0189014	-0.0104986				0.0107509	FALSE
GCST90025951	CPNE5	Female	Platelet count	PMID:34226706	Barton AR	2021-07-05	444866			6_36426039_A_G	rs664370	4.9e-12	0.0139328	0.00999816	0.0178674				0.0106155	TRUE
GCST009724	CPNE5	Female	Vertical cup-disc ratio (multi-trait analysis)	PMID:31959993	Craig JE	2020-01-20	90939			6_36586463_A_C	rs72852338	8e-13	0.0075	0.00544726	0.00955274				0.0104515	FALSE
GCST004599	CPNE5	Female	Mean platelet volume	PMID:27863252	Astle WJ	2016-11-17	164454			6_36429715_T_G	rs515186	5.689e-21	-0.0371528	-0.0449032	-0.0294024				0.0103375	TRUE
GCST90002401	CPNE5	Female	Platelet distribution width	PMID:32888494	Vuckovic D	2020-09-01	408112			6_36458313_C_T	rs9470285	1e-11	0.0159743	0.0113743	0.0205743				0.0102458	TRUE
GCST90002392	CPNE5	Female	Mean corpuscular volume	PMID:32888494	Vuckovic D	2020-09-01	408112			6_36532930_G_A	rs141790977	1.4e-10	0.0773155	0.0536883	0.100943				0.0102187	TRUE
GCST90002344	CPNE5	Female	Monocyte count	PMID:32888493	Chen MH	2020-09-01	639696			6_37033435_T_G	rs1753294	2e-14							0.0102066	FALSE
GCST010681	CPNE5	Female	Type 1 diabetes	PMID:32005708	Forgetta V	2020-01-31	24840	13872	9266	6_37203144_C_A		1.45e-08				0.704759	0.624482	0.795354	0.0101186	TRUE
GCST90002383	CPNE5	Female	Hematocrit	PMID:32888494	Vuckovic D	2020-09-01	408112			6_36628871_A_G	rs73410251	5.3e-13	-0.017086	-0.0217255	-0.0124465				0.00996024	TRUE
GCST90025975	CPNE5	Female	Mean reticulocyte volume	PMID:34226706	Barton AR	2021-07-05	436944			6_37199554_G_A	rs2776794	5.5e-09	-0.0109667	-0.0147667	-0.00716669				0.00985916	TRUE
GCST90002357	CPNE5	Female	Platelet count	PMID:32888493	Chen MH	2020-09-01	542827			6_36459499_C_T	rs6923993	3e-15	-0.015763	-0.0196712	-0.0118548				0.00983721	TRUE
GCST007073	CPNE5	Female	Hypothyroidism	PMID:30595370	Kichaev G	2018-12-27	459000			6_37010969_G_A	rs1724088	8e-09							0.00983262	FALSE
GCST007932	CPNE5	Female	Medication use (thyroid preparations)	PMID:31015401	Wu Y	2019-04-23	305582		24832	6_37010969_G_A	rs1724088	5e-08	0.0551	0.035289	0.0749111				0.00983262	FALSE
GCST90002384	CPNE5	Female	Hemoglobin	PMID:32888494	Vuckovic D	2020-09-01	408112			6_36588026_A_AT	rs144579321	5.9e-11	-0.0182494	-0.0237125	-0.0127863				0.00973197	TRUE
GCST90018852	CPNE5	Female	Glaucoma	PMID:34594039	Sakaue S	2021-09-30	662330		18859	6_36588953_T_C	rs9380582	9e-10	0.0707	0.0480804	0.0933196				0.00972118	FALSE
GCST90025976	CPNE5	Female	Mean sphered cell volume	PMID:34226706	Barton AR	2021-07-05	437736			6_37032204_C_G	rs114925152	1e-09	0.0516509	0.0339578	0.069344				0.00970084	TRUE
GCST90002395	CPNE5	Female	Mean platelet volume	PMID:32888494	Vuckovic D	2020-09-01	408112			6_36456578_CTTTTTTT_C	rs753157879	1.1e-28	-0.0251248	-0.0295569	-0.0206927				0.00964807	TRUE
GCST90002322	CPNE5	Female	Mean corpuscular hemoglobin	PMID:32888493	Chen MH	2020-09-01	486823			6_36532930_G_A	rs141790977	2.26e-10	0.071694	0.0495558	0.0938322				0.0095714	TRUE
GCST90002340	CPNE5	Female	Monocyte count	PMID:32888493	Chen MH	2020-09-01	521594			6_37033435_T_G	rs1753294	3.17e-16	-0.01544	-0.0191424	-0.0117376				0.00946115	TRUE
GCST90025963	CPNE5	Female	Mean corpuscular volume	PMID:34226706	Barton AR	2021-07-05	444035			6_37032204_C_G	rs114925152	7e-22	0.0789557	0.061975	0.0959364				0.00914373	TRUE
GCST90025988	CPNE5	Female	Red cell distribution width	PMID:34226706	Barton AR	2021-07-05	441263			6_37032204_C_G	rs114925152	4.2e-11	0.0583796	0.0398716	0.0768876				0.00914373	TRUE
GCST90085818	CPNE5	Female	Platelet-to-lymphocyte ratio	PMID:34469753	Kachuri L	2021-08-26	335030			6_36430369_C_T	rs629297	5e-08							0.0088297	FALSE
GCST90002394	CPNE5	Female	Monocyte percentage of white cells	PMID:32888494	Vuckovic D	2020-09-01	408112			6_36584557_G_A	rs181438735	1.7e-14	-0.0460149	-0.0577709	-0.0342589				0.00870388	TRUE
GCST90025963	CPNE5	Female	Mean corpuscular volume	PMID:34226706	Barton AR	2021-07-05	444035			6_36583619_T_C	rs9380580	4e-15	-0.0147781	-0.0187999	-0.0107563				0.00869691	TRUE
GCST90025975	CPNE5	Female	Mean reticulocyte volume	PMID:34226706	Barton AR	2021-07-05	436944			6_36583619_T_C	rs9380580	9.1e-18	-0.0182612	-0.0226022	-0.0139202				0.00869691	TRUE
GCST90025976	CPNE5	Female	Mean sphered cell volume	PMID:34226706	Barton AR	2021-07-05	437736			6_36583619_T_C	rs9380580	1.3e-18	-0.0176473	-0.0218373	-0.0134573				0.00869691	TRUE
NEALE2_30080_raw	CPNE5	Female	Platelet count		UKB Neale v2	2018-08-01	350474	0		6_37188830_T_C	rs1224382	5e-15	-1.10869	-1.38669	-0.830689				0.00864969	TRUE
GCST90002334	CPNE5	Female	Mean corpuscular volume	PMID:32888493	Chen MH	2020-09-01	544127			6_37189561_A_G	rs2842623	1.85e-08	-0.010449	-0.0140868	-0.00681124				0.00861888	TRUE
GCST90025960	CPNE5	Female	Mean platelet volume	PMID:34226706	Barton AR	2021-07-05	445364			6_36430525_A_G	rs544267	4.1e-80	-0.0338269	-0.0375626	-0.0300912				0.00855299	TRUE
GCST90002346	CPNE5	Female	Mean platelet volume	PMID:32888493	Chen MH	2020-09-01	460935			6_36456888_A_C	rs7744363	3.27e-66	0.03601	0.0319058	0.0401142				0.0084389	TRUE
NEALE2_30100_raw	CPNE5	Female	Mean platelet (thrombocyte) volume		UKB Neale v2	2018-08-01	350470	0		6_36456578_CTTTTTTT_C	rs753157879	3.91513e-25	-0.0294043	-0.0349688	-0.0238398				0.00842388	TRUE
NEALE2_30040_raw	CPNE5	Female	Mean corpuscular volume		UKB Neale v2	2018-08-01	350473	0		6_36588857_C_A	rs35707365	7.94024e-09	-0.0687802	-0.0921446	-0.0454158				0.00840375	TRUE
GCST90002392	CPNE5	Female	Mean corpuscular volume	PMID:32888494	Vuckovic D	2020-09-01	408112			6_36591187_T_C	rs9394363	3.5e-14	-0.0177951	-0.022398	-0.0131922				0.00827841	TRUE
GCST004603	CPNE5	Female	Platelet count	PMID:27863252	Astle WJ	2016-11-17	166066			6_37286321_C_CT	rs560242923	5.096e-12	-0.0266163	-0.0341738	-0.0190589				0.00826418	TRUE
NEALE2_30260_raw	CPNE5	Female	Mean reticulocyte volume		UKB Neale v2	2018-08-01	344728	0		6_36588857_C_A	rs35707365	5e-15	-0.167575	-0.209486	-0.125664				0.00820301	TRUE
NEALE2_30270_raw	CPNE5	Female	Mean sphered cell volume		UKB Neale v2	2018-08-01	344729	0		6_36591187_T_C	rs9394363	1e-15	-0.11628	-0.144827	-0.0877334				0.00816868	TRUE
GCST90002347	CPNE5	Female	Mean platelet volume	PMID:32888493	Chen MH	2020-09-01	2810			6_36556817_A_G	rs116957783	4e-12	-0.2899	-0.371807	-0.207993				0.00816245	FALSE
GCST90002393	CPNE5	Female	Monocyte count	PMID:32888494	Vuckovic D	2020-09-01	408112			6_37028997_C_G	rs708017	6e-14							0.00809087	FALSE
GCST90026518	CPNE5	Female	Mean platelet volume	PMID:34107879	Hu Y	2021-06-09	21347			6_36526101_G_A	rs113553570	7e-10	0.1659	0.113166	0.218634				0.00807056	FALSE
NEALE2_30190_raw	CPNE5	Female	Monocyte percentage		UKB Neale v2	2018-08-01	349861	0		6_36584557_G_A	rs181438735	4.64087e-10	-0.110969	-0.145875	-0.076063				0.00791526	TRUE
GCST90025951	CPNE5	Female	Platelet count	PMID:34226706	Barton AR	2021-07-05	444866			6_36553586_G_A	rs76976387	5.6e-34	0.114008	0.0950578	0.132958				0.00780312	TRUE
GCST90025960	CPNE5	Female	Mean platelet volume	PMID:34226706	Barton AR	2021-07-05	445364			6_36553586_G_A	rs76976387	1.9e-149	-0.225229	-0.2433	-0.207158				0.00780312	TRUE
GCST90002334	CPNE5	Female	Mean corpuscular volume	PMID:32888493	Chen MH	2020-09-01	544127			6_36591187_T_C	rs9394363	1.22e-13	-0.015459	-0.0195417	-0.0113763				0.00771599	TRUE
GCST90002396	CPNE5	Female	Mean reticulocyte volume	PMID:32888494	Vuckovic D	2020-09-01	408112			6_36591187_T_C	rs9394363	7.5e-17	-0.0203844	-0.0251754	-0.0155934				0.00770468	TRUE
GCST90002397	CPNE5	Female	Mean spheric corpuscular volume	PMID:32888494	Vuckovic D	2020-09-01	408112			6_36591187_T_C	rs9394363	2.7e-19	-0.0213197	-0.0259736	-0.0166658				0.00770468	TRUE
GCST005973	CPNE5	Female	White blood cell count	PMID:29403010	Kanai M	2018-02-05	107964			6_36386157_A_G	rs9368924	6e-10							0.00769607	FALSE
GCST90026510	CPNE5	Female	Mean platelet volume	PMID:34107879	Hu Y	2021-06-09	16201			6_36528001_C_T	rs145855729	2e-09	0.2047	0.137807	0.271593				0.00769095	FALSE
GCST90026518	CPNE5	Female	Mean platelet volume	PMID:34107879	Hu Y	2021-06-09	21347			6_36393286_C_T	rs76676074	2e-10	0.1694	0.117206	0.221594				0.00767015	FALSE
GCST90002363	CPNE5	Female	Red blood cell count	PMID:32888493	Chen MH	2020-09-01	545203			6_37175357_A_G	rs35893164	1.09e-11	-0.068035	-0.0876468	-0.0484232				0.00759894	TRUE
GCST90026509	CPNE5	Female	Platelet count	PMID:34107879	Hu Y	2021-06-09	16201			6_36526101_G_A	rs113553570	9e-09	-0.1103	-0.147907	-0.0726928				0.00751539	FALSE
GCST90002401	CPNE5	Female	Platelet distribution width	PMID:32888494	Vuckovic D	2020-09-01	408112			6_36553740_A_G	rs16888788	6.9e-16	-0.0926196	-0.115108	-0.0701308				0.00744097	TRUE
GCST004602	CPNE5	Female	Mean corpuscular volume	PMID:27863252	Astle WJ	2016-11-17	172433			6_37119031_C_A	rs529490289	8.6e-14	0.137443	0.101334	0.173553				0.00743007	TRUE
GCST90025951	CPNE5	Female	Platelet count	PMID:34226706	Barton AR	2021-07-05	444866			6_37206969_A_G	rs1680005	4.1e-22	-0.0179131	-0.0216929	-0.0141333				0.00733233	TRUE
NEALE2_30090_raw	CPNE5	Female	Platelet crit		UKB Neale v2	2018-08-01	350471	0		6_37188830_T_C	rs1224382	6.94221e-10	-0.000702885	-0.000926256	-0.000479514				0.00727291	TRUE
GCST004630	CPNE5	Female	Mean corpuscular hemoglobin	PMID:27863252	Astle WJ	2016-11-17	172332			6_37119031_C_A	rs529490289	1e-14	0.142979	0.106785	0.179173				0.00725481	TRUE
GCST90002357	CPNE5	Female	Platelet count	PMID:32888493	Chen MH	2020-09-01	542827			6_36553740_A_G	rs16888788	2.45e-34	0.119275	0.100153	0.138397				0.00722865	TRUE
NEALE2_30080_raw	CPNE5	Female	Platelet count		UKB Neale v2	2018-08-01	350474	0		6_36556817_A_G	rs116957783	3.063e-18	6.45288	5.00073	7.90503				0.00720358	TRUE
GCST90002357	CPNE5	Female	Platelet count	PMID:32888493	Chen MH	2020-09-01	542827			6_37206969_A_G	rs1680005	1.29e-23	-0.019204	-0.0229594	-0.0154486				0.00713507	TRUE
GCST90002400	CPNE5	Female	Plateletcrit	PMID:32888494	Vuckovic D	2020-09-01	408112			6_37188830_T_C	rs1224382	3.2e-13	-0.0157788	-0.0200227	-0.0115349				0.00710198	TRUE
GCST004616	CPNE5	Female	Platelet distribution width	PMID:27863252	Astle WJ	2016-11-17	164433			6_36381889_C_A	rs3778028	2.272e-09	-0.115464	-0.153327	-0.0776009				0.00706402	TRUE
GCST90002346	CPNE5	Female	Mean platelet volume	PMID:32888493	Chen MH	2020-09-01	460935			6_36526101_G_A	rs113553570	6.55e-109	-0.222952	-0.242656	-0.203248				0.00690414	TRUE
GCST90025949	CPNE5	Female	Height	PMID:34226706	Barton AR	2021-07-05	458235			6_36247916_A_G	rs4395718	4.2e-39	-0.0249597	-0.028744	-0.0211754				0.00688107	TRUE
GCST90002345	CPNE5	Female	Mean platelet volume	PMID:32888493	Chen MH	2020-09-01	10737			6_36502533_T_C	rs74625164	5e-12	-0.173693	-0.222992	-0.124394				0.00675754	FALSE
GCST004599	CPNE5	Female	Mean platelet volume	PMID:27863252	Astle WJ	2016-11-17	164454			6_36381889_C_A	rs3778028	1.152e-28	-0.216018	-0.254135	-0.1779				0.00667736	TRUE
GCST90026525	CPNE5	Female	Platelet count	PMID:34107879	Hu Y	2021-06-09	27236			6_36526101_G_A	rs113553570	3e-11	-0.0822	-0.10644	-0.0579601				0.00665584	FALSE
GCST90002361	CPNE5	Female	Platelet count	PMID:32888493	Chen MH	2020-09-01	721201			6_36526101_G_A	rs113553570	7e-77							0.00663559	FALSE
GCST004603	CPNE5	Female	Platelet count	PMID:27863252	Astle WJ	2016-11-17	166066			6_36381889_C_A	rs3778028	2.307e-09	0.117242	0.0787798	0.155704				0.00659605	TRUE
NEALE2_1190	CPNE5	Female	Nap during day		UKB Neale v2	2018-08-01	360855	0		6_36256538_C_A	rs34262487	1.43438e-08	-0.0150785	-0.0202914	-0.00986561				0.00655906	TRUE
GCST90002349	CPNE5	Female	Mean platelet volume	PMID:32888493	Chen MH	2020-09-01	484042			6_36526101_G_A	rs113553570	2e-127							0.00650293	FALSE
GCST90002396	CPNE5	Female	Mean reticulocyte volume	PMID:32888494	Vuckovic D	2020-09-01	408112			6_37199717_CTT_C	rs370099322	3.4e-10	-0.0135221	-0.0177443	-0.00929989				0.00647259	TRUE
GCST90002395	CPNE5	Female	Mean platelet volume	PMID:32888494	Vuckovic D	2020-09-01	408112			6_36556817_A_G	rs116957783	4.9e-104	-0.232768	-0.253831	-0.211705				0.00638062	TRUE
GCST90002402	CPNE5	Female	Platelet count	PMID:32888494	Vuckovic D	2020-09-01	408112			6_36556817_A_G	rs116957783	9.4e-28	0.120066	0.0985133	0.141619				0.00637779	TRUE
NEALE2_30100_raw	CPNE5	Female	Mean platelet (thrombocyte) volume		UKB Neale v2	2018-08-01	350470	0		6_36556817_A_G	rs116957783	6.61981e-68	-0.239543	-0.266501	-0.212585				0.0062934	TRUE
GCST90025958	CPNE5	Female	Sex hormone-binding globulin levels	PMID:34226706	Barton AR	2021-07-05	397043			6_37148302_G_T	rs262902	4.7e-09	-0.0121606	-0.0164861	-0.00783513				0.00615347	TRUE
NEALE2_30110_raw	CPNE5	Female	Platelet distribution width		UKB Neale v2	2018-08-01	350470	0		6_36526101_G_A	rs113553570	9.65908e-16	-0.0526634	-0.0655154	-0.0398114				0.00609841	TRUE
FINNGEN_R6_H7_CHOROIDRETINA	CPNE5	Female	Disorders of choroid and retina		FINNGEN_R6	2022-01-24	260405	0	19215	6_36496018_G_A	rs994236856	8.26e-09				1.77136	1.45834	2.15158	0.00597983	TRUE
GCST90002322	CPNE5	Female	Mean corpuscular hemoglobin	PMID:32888493	Chen MH	2020-09-01	486823			6_37175357_A_G	rs35893164	5.27e-49	0.149693	0.129762	0.169624				0.00595697	TRUE
GCST90002334	CPNE5	Female	Mean corpuscular volume	PMID:32888493	Chen MH	2020-09-01	544127			6_37175357_A_G	rs35893164	1.13e-49	0.145005	0.125834	0.164176				0.00595697	TRUE
GCST90002369	CPNE5	Female	Red cell distribution width	PMID:32888493	Chen MH	2020-09-01	531774			6_37175357_A_G	rs35893164	4.2e-14	0.07756	0.0574543	0.0976657				0.00595697	TRUE
GCST90002390	CPNE5	Female	Mean corpuscular hemoglobin	PMID:32888494	Vuckovic D	2020-09-01	408112			6_37175357_A_G	rs35893164	1.7e-43	0.15154	0.130062	0.173018				0.00595697	TRUE
GCST90002392	CPNE5	Female	Mean corpuscular volume	PMID:32888494	Vuckovic D	2020-09-01	408112			6_37175357_A_G	rs35893164	5.1e-46	0.154193	0.132971	0.175415				0.00595697	TRUE
GCST90002397	CPNE5	Female	Mean spheric corpuscular volume	PMID:32888494	Vuckovic D	2020-09-01	408112			6_37175357_A_G	rs35893164	1.5e-25	0.114332	0.0928812	0.135783				0.00595697	TRUE
GCST90002403	CPNE5	Female	Red blood cell count	PMID:32888494	Vuckovic D	2020-09-01	408112			6_37175357_A_G	rs35893164	2.7e-13	-0.0810646	-0.102811	-0.0593178				0.00595697	TRUE
GCST90002404	CPNE5	Female	Red cell distribution width	PMID:32888494	Vuckovic D	2020-09-01	408112			6_37175357_A_G	rs35893164	5e-15	0.0885247	0.0663577	0.110692				0.00595697	TRUE
NEALE2_30040_raw	CPNE5	Female	Mean corpuscular volume		UKB Neale v2	2018-08-01	350473	0		6_37175357_A_G	rs35893164	5.78108e-20	0.50707	0.398439	0.615701				0.00595697	TRUE
NEALE2_30050_raw	CPNE5	Female	Mean corpuscular haemoglobin		UKB Neale v2	2018-08-01	350472	0		6_37175357_A_G	rs35893164	3.99931e-17	0.194269	0.149011	0.239527				0.00595697	TRUE
NEALE2_30270_raw	CPNE5	Female	Mean sphered cell volume		UKB Neale v2	2018-08-01	344729	0		6_37175357_A_G	rs35893164	1.29301e-08	0.382367	0.250589	0.514145				0.00595697	TRUE
GCST90056183	CPNE5	Female	Platelet count	PMID:34469753	Kachuri L	2021-08-26	235256	100764		6_36502044_C_T	rs4236051	1e-14							0.00595359	FALSE
GCST004526	CPNE5	Female	Subclinical trait of interstitial lung disease (basilar percentage of high attenuation areas on CT scan) [AA]	PMID:28521775	Manichaikul A	2017-05-18	7671	3013		6_36528001_C_T	rs145855729	4e-08	0.126	0.0810234	0.170977				0.00578466	FALSE
GCST90002358	CPNE5	Female	Platelet count	PMID:32888493	Chen MH	2020-09-01	145648			6_36499010_C_A	rs4713978	3e-39	0.069392	0.0590153	0.0797687				0.00568214	FALSE
GCST005991	CPNE5	Female	Platelet count	PMID:29403010	Kanai M	2018-02-05	108208			6_36463722_A_G	rs77660021	7e-35							0.00560288	FALSE
GCST009597	CPNE5	Female	Multiple sclerosis	PMID:31604244	International Multiple Sclerosis Genetics Consortium	2019-09-01	41505	74299	14802	6_36380912_T_C	rs1076928	3e-19				0.885	0.861685	0.908946	0.0055451	FALSE
GCST90002396	CPNE5	Female	Mean reticulocyte volume	PMID:32888494	Vuckovic D	2020-09-01	408112			6_37175357_A_G	rs35893164	3e-15	0.0891659	0.0670634	0.111268				0.0055398	TRUE
GCST90088864	CPNE5	Female	Serum levels of protein MAPK13	PMID:35078996	Gudjonsson A	2022-01-25	5364			6_36253535_G_A	rs35517925	3e-14	0.17173	0.127432	0.216028				0.00551421	FALSE
GCST008039	CPNE5	Female	Platelet count	PMID:31217584	Wojcik GL	2019-06-19	29328			6_36377203_G_A	rs9470264	2e-11							0.00547631	FALSE
GCST005531	CPNE5	Female	Multiple sclerosis	PMID:24076602	Beecham AH	2013-11-01	38582	41505	14498	6_36407527_G_A	rs941816	4.47e-09				0.88574	0.850547	0.922388	0.00539982	TRUE
GCST007841	CPNE5	Female	Height	PMID:30595370	Kichaev G	2018-12-27	458000			6_36249383_G_A	rs4713940	5e-41							0.00532622	FALSE
GCST011494	CPNE5	Female	Daytime nap	PMID:33568662	Dashti HS	2021-02-10	452633	541333		6_36256538_C_A	rs34262487	1.2e-09	-0.0145107	-0.0191258	-0.00989563				0.00521249	TRUE
GCST007075	CPNE5	Female	Eczema	PMID:30595370	Kichaev G	2018-12-27	459000			6_36390512_T_C	rs1998266	2e-08							0.00517987	FALSE
GCST009717	CPNE5	Female	Hay fever and/or eczema	PMID:31361310	Johansson A	2019-07-30	323807		84034	6_36390512_T_C	rs1998266	2e-08				1.05009	1.03232	1.06817	0.00517987	FALSE
GCST006959_3	CPNE5	Female	Rheumatoid arthritis [EA]	PMID:30423114	Laufer VA	2018-11-13	2308	103402	916	6_36387877_A_C	rs2234067	4e-08	0.13078	0.0840971	0.177463				0.00513364	FALSE
GCST006959	CPNE5	Female	Rheumatoid arthritis	PMID:30423114	Laufer VA	2018-11-13	2308	103402	916	6_36387877_A_C	rs2234067	2e-09	0.137255	0.092402	0.182108				0.00507533	FALSE
GCST90002367	CPNE5	Female	Red blood cell count	PMID:32888493	Chen MH	2020-09-01	727624			6_36254911_G_T	rs7766116	8e-16							0.0050221	FALSE
GCST90002397	MYMX	Female	Mean spheric corpuscular volume	PMID:32888494	Vuckovic D	2020-09-01	408112			6_44218164_T_C	rs1057985	5.3e-34	-0.026587	-0.0308736	-0.0223004				0.19952	TRUE
NEALE2_30270_raw	MYMX	Female	Mean sphered cell volume		UKB Neale v2	2018-08-01	344729	0		6_43791136_G_A	rs6905288	2e-14	-0.0973717	-0.122321	-0.0724225				0.157648	TRUE
GCST90002396	MYMX	Female	Mean reticulocyte volume	PMID:32888494	Vuckovic D	2020-09-01	408112			6_44218653_T_G	rs507964	6.7e-24	-0.0227068	-0.0271213	-0.0182923				0.145142	TRUE
NEALE2_4124_raw	MYMX	Female	Heel bone mineral density (bmd) (right)		UKB Neale v2	2018-08-01	114552	0		6_44713071_A_G	rs227831	9.8e-14	-0.00419447	-0.00529889	-0.00309005				0.144234	TRUE
GCST90002392	MYMX	Female	Mean corpuscular volume	PMID:32888494	Vuckovic D	2020-09-01	408112			6_44218653_T_G	rs507964	1.4e-24	-0.0221392	-0.0263804	-0.017898				0.102305	TRUE
GCST006979	MYMX	Female	Heel bone mineral density	PMID:30598549	Morris JA	2018-12-31	426824			6_44230625_T_C	rs45573936	3e-11	-0.0378841	-0.0488081	-0.0269601				0.0880665	TRUE
GCST90018964	MYMX	Female	Mean corpuscular hemoglobin	PMID:34594039	Sakaue S	2021-09-30	478500			6_44235582_G_A	rs62401155	9e-18	-0.0224	-0.0275134	-0.0172866				0.0783862	FALSE
NEALE2_30270_raw	MYMX	Female	Mean sphered cell volume		UKB Neale v2	2018-08-01	344729	0		6_44235582_G_A	rs62401155	4.38144e-29	-0.155951	-0.183256	-0.128646				0.0777891	TRUE
GCST90002338	MYMX	Female	Mean corpuscular volume	PMID:32888493	Chen MH	2020-09-01	696882			6_44235582_G_A	rs62401155	2e-39							0.0771196	FALSE
GCST90018966	MYMX	Female	Mean corpuscular volume	PMID:34594039	Sakaue S	2021-09-30	480305			6_44235582_G_A	rs62401155	9e-25	-0.0269	-0.0320306	-0.0217694				0.0771196	FALSE
NEALE2_30040_raw	MYMX	Female	Mean corpuscular volume		UKB Neale v2	2018-08-01	350473	0		6_44235582_G_A	rs62401155	2.81989e-22	-0.111464	-0.133969	-0.0889587				0.0760816	TRUE
NEALE2_30260_raw	MYMX	Female	Mean reticulocyte volume		UKB Neale v2	2018-08-01	344728	0		6_44235582_G_A	rs62401155	4.8224e-32	-0.242607	-0.282961	-0.202253				0.0760816	TRUE
GCST90002372	MYMX	Female	Red cell distribution width	PMID:32888493	Chen MH	2020-09-01	563352			6_44235582_G_A	rs62401155	4e-12							0.0756499	FALSE
GCST90002326	MYMX	Female	Mean corpuscular hemoglobin	PMID:32888493	Chen MH	2020-09-01	630125			6_44235582_G_A	rs62401155	6e-22							0.0754256	FALSE
GCST90000059	MYMX	Female	Diastolic blood pressure	PMID:33230300	Surendran P	2020-11-23	810865	354096		6_44230625_T_C	rs45573936	1e-15	-0.038264	-0.0476582	-0.0288697				0.0729834	TRUE
GCST90002334	MYMX	Female	Mean corpuscular volume	PMID:32888493	Chen MH	2020-09-01	544127			6_44218164_T_C	rs1057985	1.46e-24	-0.01998	-0.0238059	-0.0161541				0.0727077	TRUE
GCST90002374	MYMX	Female	White blood cell count	PMID:32888493	Chen MH	2020-09-01	562243			6_44624113_G_A	rs900403	5.32e-10	-0.01162	-0.0152852	-0.0079548				0.0688217	TRUE
GCST90002405	MYMX	Female	Reticulocyte count	PMID:32888494	Vuckovic D	2020-09-01	408112			6_44239102_A_G	rs62403864	4.2e-11	0.0167408	0.0117657	0.0217159				0.0662432	TRUE
GCST90002404	MYMX	Female	Red cell distribution width	PMID:32888494	Vuckovic D	2020-09-01	408112			6_44235582_G_A	rs62401155	3e-11	0.0155966	0.0109964	0.0201968				0.0647492	TRUE
GCST90011995	MYMX	Female	Vascular endothelial growth factor levels	PMID:33067605	Folkersen L	2020-10-16	21758	9173		6_43965527_G_A	rs78135777	2.6e-48	0.3977	0.344388	0.451012				0.0634716	TRUE
GCST90002407	MYMX	Female	White blood cell count	PMID:32888494	Vuckovic D	2020-09-01	408112			6_44624113_G_A	rs900403	3.6e-10	-0.0134888	-0.0177043	-0.00927329				0.0591296	TRUE
NEALE2_30010_raw	MYMX	Female	Red blood cell (erythrocyte) count		UKB Neale v2	2018-08-01	350475	0		6_44236999_T_A	rs6916554	4.35867e-08	0.00542209	0.00348131	0.00736287				0.0589325	TRUE
GCST001155	MYMX	Female	Vascular endothelial growth factor levels	PMID:21757650	Debette S	2011-07-14	3527	1727		6_43957789_A_G	rs4513773	5E-324							0.0587729	FALSE
GCST003403	MYMX	Female	Vascular endothelial growth factor levels	PMID:26910538	Choi SH	2016-02-24	13312	2800		6_43957870_G_A	rs6921438	5E-324	-0.64	-0.64	-0.64				0.0587729	FALSE
GCST004422	MYMX	Female	Vascular endothelial growth factor levels	PMID:27989323	Ahola-Olli AV	2016-12-13	7118			6_43959313_A_G	rs7767396	3.69e-171	-0.4818	-0.515512	-0.448088				0.0587729	TRUE
GCST004439	MYMX	Female	Interleukin-12p70 levels	PMID:27989323	Ahola-Olli AV	2016-12-13	8270			6_43957026_G_A	rs4413611	2.62e-124	-0.3777	-0.408864	-0.346536				0.0587729	TRUE
GCST004443	MYMX	Female	Interleukin-13 levels	PMID:27989323	Ahola-Olli AV	2016-12-13	3557			6_43961248_A_G	rs9472168	1e-65	-0.4244	-0.472979	-0.375821				0.0587729	FALSE
GCST004444	MYMX	Female	Interleukin-10 levels	PMID:27989323	Ahola-Olli AV	2016-12-13	7681			6_43957870_G_A	rs6921438	7.639e-67	-0.2878	-0.320336	-0.255264				0.0587729	TRUE
GCST004451	MYMX	Female	Interleukin-7 levels	PMID:27989323	Ahola-Olli AV	2016-12-13	3409			6_43960774_G_T	rs4320361	7e-39	-0.3245	-0.373265	-0.275735				0.0587729	FALSE
GCST008198	MYMX	Female	Vascular endothelial growth factor levels	PMID:31217265	Sliz E	2019-06-19	13577			6_43959313_A_G	rs7767396	5e-96	0.272	0.246361	0.297639				0.0587729	FALSE
GCST009243_8	MYMX	Female	Cytokine levels [VEGF-A]	PMID:31679650	Nath AP	2019-10-30	9263			6_43959313_A_G	rs7767396	3e-201							0.0587729	FALSE
GCST009244	MYMX	Female	Cytokine network levels (multivariate analysis)	PMID:31679650	Nath AP	2019-10-30	9263			6_43959313_A_G	rs7767396	7e-306							0.0587729	FALSE
GCST90000584	MYMX	Female	Inflammatory biomarkers (multivariate analysis)	PMID:33110245	Ruotsalainen SE	2020-10-27	6890			6_43957870_G_A	rs6921438	3e-296							0.0587729	FALSE
GCST90011995	MYMX	Female	Vascular endothelial growth factor levels	PMID:33067605	Folkersen L	2020-10-16	21758	9173		6_43957870_G_A	rs6921438	1.86e-302	-0.4456	-0.46912	-0.42208				0.0587729	TRUE
GCST003403	MYMX	Female	Vascular endothelial growth factor levels	PMID:26910538	Choi SH	2016-02-24	13312	2800		6_43979661_T_C	rs1740073	4e-17	-0.09	-0.110968	-0.0690322				0.0585747	FALSE
GCST90025972	MYMX	Female	Reticulocyte count	PMID:34226706	Barton AR	2021-07-05	437291			6_44235623_G_A	rs62401156	8.2e-13	0.0163741	0.0118079	0.0209403				0.0581581	TRUE
GCST90002397	MYMX	Female	Mean spheric corpuscular volume	PMID:32888494	Vuckovic D	2020-09-01	408112			6_44236999_T_A	rs6916554	7.9e-51	-0.0366068	-0.0413916	-0.031822				0.0581063	TRUE
GCST90002322	MYMX	Female	Mean corpuscular hemoglobin	PMID:32888493	Chen MH	2020-09-01	486823			6_44236327_T_G	rs11962761	7.57e-24	-0.022886	-0.0273372	-0.0184348				0.0571232	TRUE
GCST004422	MYMX	Female	Vascular endothelial growth factor levels	PMID:27989323	Ahola-Olli AV	2016-12-13	7118			6_43972465_A_G	rs9472183	5.2e-14	0.1282	0.09488	0.16152				0.0570085	TRUE
GCST004439	MYMX	Female	Interleukin-12p70 levels	PMID:27989323	Ahola-Olli AV	2016-12-13	8270			6_43972465_A_G	rs9472183	8.611e-11	0.1019	0.071128	0.132672				0.0570085	TRUE
GCST90002403	MYMX	Female	Red blood cell count	PMID:32888494	Vuckovic D	2020-09-01	408112			6_44239102_A_G	rs62403864	2.9e-12	0.0172538	0.0124101	0.0220975				0.0569501	TRUE
GCST90087729	MYMX	Female	Serum levels of protein VEGFA	PMID:35078996	Gudjonsson A	2022-01-25	5364			6_43979661_T_C	rs1740073	3e-31	-0.229021	-0.267627	-0.190415				0.0568618	FALSE
GCST90088788	MYMX	Female	Serum levels of protein VEGFA	PMID:35078996	Gudjonsson A	2022-01-25	5366			6_43979661_T_C	rs1740073	2e-27	-0.215264	-0.254151	-0.176377				0.0568618	FALSE
GCST90002363	MYMX	Female	Red blood cell count	PMID:32888493	Chen MH	2020-09-01	545203			6_44239102_A_G	rs62403864	2.5e-14	0.016979	0.012616	0.021342				0.0565636	TRUE
GCST90002392	MYMX	Female	Mean corpuscular volume	PMID:32888494	Vuckovic D	2020-09-01	408112			6_44249637_T_G	rs34083426	4.7e-38	-0.0311284	-0.0358594	-0.0263974				0.0560908	TRUE
GCST004604	MYMX	Female	Hematocrit	PMID:27863252	Astle WJ	2016-11-17	173039			6_43973400_T_C	rs17287978	3.625e-18	-0.0716895	-0.0878589	-0.0555201				0.055987	TRUE
GCST004615	MYMX	Female	Hemoglobin concentration	PMID:27863252	Astle WJ	2016-11-17	172925			6_43973400_T_C	rs17287978	7e-15	-0.0644645	-0.0807061	-0.048223				0.055987	TRUE
GCST007069	MYMX	Female	Red blood cell count	PMID:30595370	Kichaev G	2018-12-27	445000			6_43973400_T_C	rs17287978	5e-38							0.055987	FALSE
GCST009243_7	MYMX	Female	Cytokine levels [VEGF-A, conditioned on rs7767396]	PMID:31679650	Nath AP	2019-10-30	9263			6_43974652_T_C	rs4714729	9e-13							0.055987	FALSE
GCST009244_5	MYMX	Female	Cytokine network levels (multivariate analysis) [conditioned on rs7767396]	PMID:31679650	Nath AP	2019-10-30	9263			6_43974652_T_C	rs4714729	7e-10							0.055987	FALSE
GCST90000584	MYMX	Female	Inflammatory biomarkers (multivariate analysis)	PMID:33110245	Ruotsalainen SE	2020-10-27	6890			6_43974045_A_G	rs4714726	1e-11							0.055987	FALSE
GCST90002304	MYMX	Female	Hematocrit	PMID:32888493	Chen MH	2020-09-01	562259			6_43973400_T_C	rs17287978	2.07e-56	-0.072748	-0.0817542	-0.0637418				0.055987	TRUE
GCST90002310	MYMX	Female	Hemoglobin concentration	PMID:32888493	Chen MH	2020-09-01	563946			6_43973400_T_C	rs17287978	3.28e-51	-0.069139	-0.0781374	-0.0601406				0.055987	TRUE
GCST90002383	MYMX	Female	Hematocrit	PMID:32888494	Vuckovic D	2020-09-01	408112			6_43973400_T_C	rs17287978	1.9e-45	-0.0704037	-0.0801558	-0.0606516				0.055987	TRUE
GCST90002384	MYMX	Female	Hemoglobin	PMID:32888494	Vuckovic D	2020-09-01	408112			6_43973400_T_C	rs17287978	2.5e-43	-0.0686304	-0.0783774	-0.0588834				0.055987	TRUE
GCST90025964	MYMX	Female	Red blood cell count	PMID:34226706	Barton AR	2021-07-05	445305			6_43973400_T_C	rs17287978	2.6e-40	-0.0575802	-0.0662858	-0.0488746				0.055987	TRUE
GCST90025969	MYMX	Female	Hemoglobin levels	PMID:34226706	Barton AR	2021-07-05	445373			6_43973400_T_C	rs17287978	6.7e-42	-0.0619291	-0.0710079	-0.0528503				0.055987	TRUE
NEALE2_30020_raw	MYMX	Female	Haemoglobin concentration		UKB Neale v2	2018-08-01	350474	0		6_43973400_T_C	rs17287978	3.0459e-25	-0.0566869	-0.0673896	-0.0459842				0.055987	TRUE
NEALE2_30030_raw	MYMX	Female	Haematocrit percentage		UKB Neale v2	2018-08-01	350475	0		6_43973400_T_C	rs17287978	6.24035e-30	-0.183	-0.214557	-0.151443				0.055987	TRUE
GCST90025963	MYMX	Female	Mean corpuscular volume	PMID:34226706	Barton AR	2021-07-05	444035			6_44235623_G_A	rs62401156	6e-38	-0.0256402	-0.0297962	-0.0214842				0.0556149	TRUE
GCST90025964	MYMX	Female	Red blood cell count	PMID:34226706	Barton AR	2021-07-05	445305			6_44235623_G_A	rs62401156	3.8e-12	0.0155423	0.0111662	0.0199184				0.0554854	TRUE
GCST90025962	MYMX	Female	Mean corpuscular hemoglobin concentration	PMID:34226706	Barton AR	2021-07-05	443081			6_44235623_G_A	rs62401156	8.3e-24	-0.0205761	-0.0247714	-0.0163808				0.0552972	TRUE
GCST90025975	MYMX	Female	Mean reticulocyte volume	PMID:34226706	Barton AR	2021-07-05	436944			6_44235623_G_A	rs62401156	2e-46	-0.0314015	-0.0358858	-0.0269172				0.0540694	TRUE
GCST004602	MYMX	Female	Mean corpuscular volume	PMID:27863252	Astle WJ	2016-11-17	172433			6_44235582_G_A	rs62401155	5.654e-11	-0.0254648	-0.0330818	-0.0178479				0.0538923	TRUE
GCST007074	MYMX	Female	Red cell distribution width	PMID:30595370	Kichaev G	2018-12-27	445000			6_44234615_C_T	rs6458375	7e-11							0.0538779	FALSE
GCST007069	MYMX	Female	Red blood cell count	PMID:30595370	Kichaev G	2018-12-27	445000			6_44239102_A_G	rs62403864	2e-12							0.0532033	FALSE
GCST90025976	MYMX	Female	Mean sphered cell volume	PMID:34226706	Barton AR	2021-07-05	437736			6_44235623_G_A	rs62401156	4.6e-44	-0.0300615	-0.0343899	-0.0257331				0.0506167	TRUE
GCST003996	MYMX	Female	Monobrow	PMID:27182965	Pickrell JK	2016-05-16	69284			6_44714103_G_C	rs227833	6e-16							0.0502231	FALSE
GCST002766	MYMX	Female	Exudative age-related macular degeneration	PMID:25629512	Cheng CY	2015-01-28	7810	14515	2119	6_44003090_G_A	rs2295334	6e-18							0.0501239	FALSE
FINNGEN_R6_E4_GOITREMULTINOD	MYMX	Female	Nontoxic multinodular goitre		FINNGEN_R6	2022-01-24	226071	0	4096	6_43938518_C_T	rs66760320	9.55e-11				1.21028	1.14233	1.28227	0.0499148	TRUE
GCST006897	MYMX	Female	Hyperthyroidism	PMID:30367059	Teumer A	2018-10-26	51823		1840	6_43938518_C_T	rs66760320	4e-08	0.192	0.123464	0.260536				0.0499148	FALSE
GCST90018853	MYMX	Female	Goiter	PMID:34594039	Sakaue S	2021-09-30	633436		3838	6_43938518_C_T	rs66760320	1e-08	0.163	0.107251	0.218749				0.0499148	FALSE
NEALE2_30050_raw	MYMX	Female	Mean corpuscular haemoglobin		UKB Neale v2	2018-08-01	350472	0		6_44236999_T_A	rs6916554	5.32e-13	-0.0371165	-0.0471965	-0.0270365				0.0498522	TRUE
GCST90002390	MYMX	Female	Mean corpuscular hemoglobin	PMID:32888494	Vuckovic D	2020-09-01	408112			6_44235582_G_A	rs62401155	4e-25	-0.0235669	-0.0280284	-0.0191054				0.0484391	TRUE
GCST007068	MYMX	Female	Mean corpuscular hemoglobin	PMID:30595370	Kichaev G	2018-12-27	443000			6_44235582_G_A	rs62401155	2e-22							0.0483112	FALSE
GCST90002369	MYMX	Female	Red cell distribution width	PMID:32888493	Chen MH	2020-09-01	531774			6_44235582_G_A	rs62401155	7.28e-12	0.014567	0.010404	0.01873				0.0480505	TRUE
GCST90025982	MYMX	Female	Heel bone mineral density T score	PMID:34226706	Barton AR	2021-07-05	445855			6_44230625_T_C	rs45573936	1e-08	-0.0353904	-0.0469334	-0.0238474				0.0475585	TRUE
GCST001856_7	MYMX	Female	Thyroid hormone levels [TSH]	PMID:23408906	Porcu E	2013-02-07	26420			6_43937043_C_T	rs11755845	2e-10	-0.065	-0.0850272	-0.0449728				0.0469226	FALSE
GCST008165	MYMX	Female	Thyroid stimulating hormone levels	PMID:25743335	Taylor PN	2015-03-06	16335			6_43933447_T_C	rs6923866	8e-15	-0.102	-0.127738	-0.0762623				0.0469226	FALSE
GCST90061528	MYMX	Female	Thyroid stimulating hormone levels	PMID:34524976	Nolan J	2021-09-01	2832	1104		6_43937043_C_T	rs11755845	8e-09	-0.0525	-0.0703384	-0.0346616				0.0469226	FALSE
GCST004609	MYMX	Female	Monocyte percentage of white cells	PMID:27863252	Astle WJ	2016-11-17	170494			6_44628384_T_C	rs75492293	1.52e-13	-0.0438158	-0.0554448	-0.0321869				0.0455404	TRUE
NEALE2_30130_raw	MYMX	Female	Monocyte count		UKB Neale v2	2018-08-01	349856	0		6_44623269_T_C	rs11963621	7.02313e-17	-0.00717056	-0.0088543	-0.00548682				0.0455404	TRUE
GCST001659	MYMX	Female	Stroke (ischemic) [LAA]	PMID:22941190	Holliday EG	2012-09-02	2406	54410	1162	6_44626422_T_G	rs556621	5e-08				0.826446	0.771702	0.885074	0.0455047	FALSE
GCST007066	MYMX	Female	Heel bone mineral density	PMID:30595370	Kichaev G	2018-12-27	446000			6_44627422_T_C	rs658710	1e-12							0.0455047	FALSE
GCST90002340	MYMX	Female	Monocyte count	PMID:32888493	Chen MH	2020-09-01	521594			6_44623984_G_A	rs79894332	6.3e-54	-0.048205	-0.0543124	-0.0420976				0.0455047	TRUE
GCST90002344	MYMX	Female	Monocyte count	PMID:32888493	Chen MH	2020-09-01	639696			6_44623269_T_C	rs11963621	1e-50							0.0455047	FALSE
GCST90002393	MYMX	Female	Monocyte count	PMID:32888494	Vuckovic D	2020-09-01	408112			6_44623269_T_C	rs11963621	2e-37	-0.0469026	-0.0540932	-0.0397119				0.0455047	FALSE
GCST90002394	MYMX	Female	Monocyte percentage of white cells	PMID:32888494	Vuckovic D	2020-09-01	408112			6_44623984_G_A	rs79894332	1.8e-37	-0.0450739	-0.0519801	-0.0381677				0.0455047	TRUE
GCST90018962	MYMX	Female	Lymphocyte counts	PMID:34594039	Sakaue S	2021-09-30	445573			6_44624969_G_A	rs9472313	3e-09	-0.0131	-0.0174287	-0.00877132				0.0455047	FALSE
GCST90018967	MYMX	Female	Monocyte count	PMID:34594039	Sakaue S	2021-09-30	444975			6_44623269_T_C	rs11963621	6e-31	-0.0443	-0.051806	-0.036794				0.0455047	FALSE
GCST90056177	MYMX	Female	Monocyte count	PMID:34469753	Kachuri L	2021-08-26	234690	100494		6_44623269_T_C	rs11963621	1e-15							0.0455047	FALSE
GCST90056181	MYMX	Female	Lymphocyte-to-monocyte ratio	PMID:34469753	Kachuri L	2021-08-26	234184	100284		6_44623984_G_A	rs79894332	4e-16							0.0455047	FALSE
NEALE2_30190_raw	MYMX	Female	Monocyte percentage		UKB Neale v2	2018-08-01	349861	0		6_44623269_T_C	rs11963621	3.65724e-19	-0.0940383	-0.114638	-0.0734385				0.0455047	TRUE
GCST90002316	MYMX	Female	Lymphocyte counts	PMID:32888493	Chen MH	2020-09-01	524923			6_44606085_C_T	rs4711790	4.88e-18	-0.017265	-0.0211713	-0.0133587				0.0453661	TRUE
GCST90002320	MYMX	Female	Lymphocyte counts	PMID:32888493	Chen MH	2020-09-01	643370			6_44606085_C_T	rs4711790	2e-16							0.0453661	FALSE
GCST90002388	MYMX	Female	Lymphocyte counts	PMID:32888494	Vuckovic D	2020-09-01	408112			6_44606085_C_T	rs4711790	7.4e-18	-0.0192383	-0.0236189	-0.0148577				0.0453661	TRUE
GCST90025948	MYMX	Female	Serum phosphate levels	PMID:34226706	Barton AR	2021-07-05	400159			6_44598830_C_T	rs476142	4.2e-12	-0.0151204	-0.0193223	-0.0109185				0.0453661	TRUE
GCST90025984	MYMX	Female	Lymphocyte counts	PMID:34226706	Barton AR	2021-07-05	443762			6_44608928_A_G	rs9395035	2e-15	-0.0161639	-0.020162	-0.0121658				0.0453661	TRUE
GCST90002334	MYMX	Female	Mean corpuscular volume	PMID:32888493	Chen MH	2020-09-01	544127			6_44244184_C_G	rs62403867	5.18e-42	-0.029546	-0.033807	-0.025285				0.0450222	TRUE
GCST90002396	MYMX	Female	Mean reticulocyte volume	PMID:32888494	Vuckovic D	2020-09-01	408112			6_44249637_T_G	rs34083426	5.2e-46	-0.0357709	-0.0406943	-0.0308475				0.0450222	TRUE
GCST006585_1850	MYMX	Female	Blood protein levels [VEGFA, 14032_2_3]	PMID:30072576	Emilsson V	2018-08-02	3200			6_43931791_C_T	rs864430	6e-21	-0.229401	-0.277285	-0.181518				0.0446965	FALSE
GCST006585_1851	MYMX	Female	Blood protein levels [VEGFA, 2597_8_3]	PMID:30072576	Emilsson V	2018-08-02	3200			6_43931791_C_T	rs864430	9e-18	-0.20801	-0.255494	-0.160526				0.0446965	FALSE
GCST006585_1852	MYMX	Female	Blood protein levels [VEGFA, 4867_15_2]	PMID:30072576	Emilsson V	2018-08-02	3200			6_43931791_C_T	rs864430	9e-18	-0.211312	-0.259549	-0.163074				0.0446965	FALSE
GCST006585_711	MYMX	Female	Blood protein levels [FLT1, 8231_122_3]	PMID:30072576	Emilsson V	2018-08-02	3200			6_43931791_C_T	rs864430	1e-09	0.147509	0.100185	0.194832				0.0446965	FALSE
GCST006288	MYMX	Female	Heel bone mineral density	PMID:28869591	Kemp JP	2017-09-04	142487			6_44709436_C_T	rs113166754	5.2e-47	-0.0996059	-0.113175	-0.086037				0.0435427	TRUE
GCST006433	MYMX	Female	Heel bone mineral density	PMID:30048462	Kim SK	2018-07-26	394929			6_44594956_C_G	rs575445	2e-12							0.0433157	FALSE
GCST90025947	MYMX	Female	Serum alkaline phosphatase levels	PMID:34226706	Barton AR	2021-07-05	437896			6_44591916_G_A	rs879831	1.1e-19	0.0159621	0.0122735	0.0196507				0.0433157	TRUE
GCST001482	MYMX	Female	Lumbar spine bone mineral density	PMID:22504420	Estrada K	2012-04-15	32961	50933		6_44671447_T_C	rs11755164	6e-11	0.04	0.0280191	0.0519809				0.0419444	FALSE
GCST005348	MYMX	Female	Total body bone mineral density	PMID:29304378	Medina-Gomez C	2018-01-04	66945			6_44669182_C_T	rs7741085	2e-13	0.0423	0.0310182	0.0535818				0.0419444	FALSE
GCST005348_2	MYMX	Female	Total body bone mineral density [European]	PMID:29304378	Medina-Gomez C	2018-01-04	66945			6_44669182_C_T	rs7741085	1e-13	0.0465	0.0342515	0.0587485				0.0419444	FALSE
GCST006394	MYMX	Female	Intraocular pressure	PMID:30054594	MacGregor S	2018-07-27	133492			6_44671363_G_C	rs11752730	5e-11							0.0419444	FALSE
GCST010376	MYMX	Female	Intraocular pressure	PMID:32352494	Han X	2020-04-30	101939		101939	6_44671363_G_C	rs11752730	2e-08							0.0419444	FALSE
GCST90002304	MYMX	Female	Hematocrit	PMID:32888493	Chen MH	2020-09-01	562259			6_44661923_A_T	rs535895	1.14e-10	0.012101	0.008426	0.015776				0.0419444	TRUE
GCST90002310	MYMX	Female	Hemoglobin concentration	PMID:32888493	Chen MH	2020-09-01	563946			6_44663446_T_C	rs581465	1.74e-09	0.011248	0.00758868	0.0149073				0.0419444	TRUE
GCST90025955	MYMX	Female	Apolipoprotein A1 levels	PMID:34226706	Barton AR	2021-07-05	398508			6_44663446_T_C	rs581465	6.1e-11	0.0130406	0.008953	0.0171282				0.0419444	TRUE
GCST90025964	MYMX	Female	Red blood cell count	PMID:34226706	Barton AR	2021-07-05	445305			6_44663446_T_C	rs581465	3.5e-09	0.0109645	0.007206	0.014723				0.0419444	TRUE
GCST90025969	MYMX	Female	Hemoglobin levels	PMID:34226706	Barton AR	2021-07-05	445373			6_44663446_T_C	rs581465	2e-08	0.0108792	0.00695965	0.0147987				0.0419444	TRUE
GCST004422	MYMX	Female	Vascular endothelial growth factor levels	PMID:27989323	Ahola-Olli AV	2016-12-13	7118			6_44059177_C_T	rs12199215	3.23e-13	0.1517	0.111324	0.192076				0.0416905	TRUE
GCST004439	MYMX	Female	Interleukin-12p70 levels	PMID:27989323	Ahola-Olli AV	2016-12-13	8270			6_44059177_C_T	rs12199215	5.108e-11	0.1278	0.090168	0.165432				0.0416905	TRUE
GCST006979	MYMX	Female	Heel bone mineral density	PMID:30598549	Morris JA	2018-12-31	426824			6_43887714_G_C	rs10948100	4.6e-08	0.0123654	0.00863905	0.0160918				0.0415687	TRUE
GCST004601	MYMX	Female	Red blood cell count	PMID:27863252	Astle WJ	2016-11-17	172952			6_44062274_A_G	rs833805	3.064e-27	0.0651929	0.0533733	0.0770125				0.041373	TRUE
GCST004604	MYMX	Female	Hematocrit	PMID:27863252	Astle WJ	2016-11-17	173039			6_44062274_A_G	rs833805	5.659e-36	0.0750786	0.063327	0.0868302				0.041373	TRUE
GCST004615	MYMX	Female	Hemoglobin concentration	PMID:27863252	Astle WJ	2016-11-17	172925			6_44062274_A_G	rs833805	4.697e-31	0.069782	0.0579798	0.0815841				0.041373	TRUE
GCST005994	MYMX	Female	Hematocrit	PMID:29403010	Kanai M	2018-02-05	108757			6_44062274_A_G	rs833805	8e-11							0.041373	FALSE
GCST007069	MYMX	Female	Red blood cell count	PMID:30595370	Kichaev G	2018-12-27	445000			6_44062274_A_G	rs833805	6e-70							0.041373	FALSE
GCST010083	MYMX	Female	Hemoglobin levels	PMID:32327693	Oskarsson GR	2020-04-23	684122			6_44062274_A_G	rs833805	8e-54	0.055	0.0480209	0.0619791				0.041373	FALSE
GCST011119	MYMX	Female	Urate levels	PMID:33356394	Gill D	2020-12-28	454183			6_44062274_A_G	rs833805	4e-17	0.0264	0.0202494	0.0325506				0.041373	FALSE
GCST011521	MYMX	Female	Urate levels	PMID:33587031	Sinnott-Armstrong N	2021-02-15	318526			6_44062274_A_G	rs833805	3e-15	0.00722085	0.00542728	0.00901442				0.041373	FALSE
GCST90002304	MYMX	Female	Hematocrit	PMID:32888493	Chen MH	2020-09-01	562259			6_44062274_A_G	rs833805	4.89e-106	0.069865	0.0636067	0.0761233				0.041373	TRUE
GCST90002305	MYMX	Female	Hematocrit	PMID:32888493	Chen MH	2020-09-01	142940			6_44062274_A_G	rs833805	2e-15	0.045524	0.0342882	0.0567598				0.041373	FALSE
GCST90002308	MYMX	Female	Hematocrit	PMID:32888493	Chen MH	2020-09-01	737823			6_44062274_A_G	rs833805	1e-115							0.041373	FALSE
GCST90002310	MYMX	Female	Hemoglobin concentration	PMID:32888493	Chen MH	2020-09-01	563946			6_44062274_A_G	rs833805	8.92e-95	0.065863	0.0596145	0.0721115				0.041373	TRUE
GCST90002314	MYMX	Female	Hemoglobin concentration	PMID:32888493	Chen MH	2020-09-01	746431			6_44062274_A_G	rs833805	3e-100							0.041373	FALSE
GCST90002363	MYMX	Female	Red blood cell count	PMID:32888493	Chen MH	2020-09-01	545203			6_44062274_A_G	rs833805	2.89e-79	0.060076	0.0538314	0.0663206				0.041373	TRUE
GCST90002364	MYMX	Female	Red blood cell count	PMID:32888493	Chen MH	2020-09-01	150708			6_44062274_A_G	rs833805	2e-13	0.041732	0.0306016	0.0528624				0.041373	FALSE
GCST90002367	MYMX	Female	Red blood cell count	PMID:32888493	Chen MH	2020-09-01	727624			6_44062274_A_G	rs833805	1e-87							0.041373	FALSE
GCST90002383	MYMX	Female	Hematocrit	PMID:32888494	Vuckovic D	2020-09-01	408112			6_44062274_A_G	rs833805	7.3e-92	0.070993	0.0641479	0.0778381				0.041373	TRUE
GCST90002384	MYMX	Female	Hemoglobin	PMID:32888494	Vuckovic D	2020-09-01	408112			6_44062274_A_G	rs833805	1e-84	0.0680859	0.0612436	0.0749282				0.041373	TRUE
GCST90002403	MYMX	Female	Red blood cell count	PMID:32888494	Vuckovic D	2020-09-01	408112			6_44062274_A_G	rs833805	1e-68	0.0599273	0.0532224	0.0666322				0.041373	TRUE
GCST90018737	MYMX	Female	Hemoglobin	PMID:34594039	Sakaue S	2021-09-30	152447			6_44062274_A_G	rs833805	1e-12	0.0332476	0.0241087	0.0423865				0.041373	FALSE
GCST90018740	MYMX	Female	Hematocrit	PMID:34594039	Sakaue S	2021-09-30	153015			6_44062274_A_G	rs833805	4e-15	0.0373762	0.0280499	0.0467025				0.041373	FALSE
GCST90018751	MYMX	Female	Red blood cell count	PMID:34594039	Sakaue S	2021-09-30	153512			6_44062274_A_G	rs833805	1e-15	0.0380418	0.0287527	0.0473309				0.041373	FALSE
GCST90018957	MYMX	Female	Hemoglobin	PMID:34594039	Sakaue S	2021-09-30	502921			6_44062274_A_G	rs833805	5e-71	0.0461	0.0410293	0.0511707				0.041373	FALSE
GCST90018960	MYMX	Female	Hematocrit	PMID:34594039	Sakaue S	2021-09-30	503490			6_44062274_A_G	rs833805	6e-75	0.0485	0.0433104	0.0536896				0.041373	FALSE
GCST90018971	MYMX	Female	Red blood cell count	PMID:34594039	Sakaue S	2021-09-30	503987			6_44062274_A_G	rs833805	5e-61	0.045	0.0396485	0.0503515				0.041373	FALSE
NEALE2_30010_raw	MYMX	Female	Red blood cell (erythrocyte) count		UKB Neale v2	2018-08-01	350475	0		6_44062274_A_G	rs833805	1.15669e-46	0.019625	0.0169438	0.0223062				0.041373	TRUE
NEALE2_30020_raw	MYMX	Female	Haemoglobin concentration		UKB Neale v2	2018-08-01	350474	0		6_44062274_A_G	rs833805	2.4831e-60	0.0626828	0.0551856	0.07018				0.041373	TRUE
NEALE2_30030_raw	MYMX	Female	Haematocrit percentage		UKB Neale v2	2018-08-01	350475	0		6_44062274_A_G	rs833805	3.2954e-61	0.186206	0.1641	0.208312				0.041373	TRUE
GCST90025969	MYMX	Female	Hemoglobin levels	PMID:34226706	Barton AR	2021-07-05	445373			6_44078406_C_T	rs9357429	6.1e-13	-0.0206497	-0.0263451	-0.0149543				0.0409057	TRUE
NEALE2_2395_1	MYMX	Female	Pattern 1 | hair/balding pattern		UKB Neale v2	2018-08-01	165649	0	53076	6_44708683_C_T	rs227819	2.06676e-21				0.914746	0.898087	0.931713	0.0407515	TRUE
GCST90007203	MYMX	Female	Facial morphology (segment 23)	PMID:33288918	White JD	2020-12-07	4680	3566		6_44713520_T_C	rs227832	4e-37							0.0407383	FALSE
GCST007020	MYMX	Female	Male-pattern baldness	PMID:30573740	Yap CX	2018-12-20	205327			6_44682476_G_C	rs9472325	4e-29							0.0399848	FALSE
NEALE2_2395_4	MYMX	Female	Pattern 4 | hair/balding pattern		UKB Neale v2	2018-08-01	165649	0	30225	6_44676487_G_C	rs55643629	4.00593e-22				0.896211	0.87653	0.916335	0.0399848	TRUE
GCST005995	MYMX	Female	Hemoglobin	PMID:29403010	Kanai M	2018-02-05	108769			6_44062274_A_G	rs833805	4e-09							0.039898	FALSE
GCST001155	MYMX	Female	Vascular endothelial growth factor levels	PMID:21757650	Debette S	2011-07-14	3527	1727		6_43929990_C_T	rs9472155	2e-26							0.0392112	FALSE
GCST90025988	MYMX	Female	Red cell distribution width	PMID:34226706	Barton AR	2021-07-05	441263			6_44235623_G_A	rs62401156	6.8e-10	0.0143072	0.00977717	0.0188372				0.0382162	TRUE
GCST004422	MYMX	Female	Vascular endothelial growth factor levels	PMID:27989323	Ahola-Olli AV	2016-12-13	7118			6_44172132_C_T	rs7763358	1.578e-12	0.2055	0.147876	0.263124				0.03759	TRUE
GCST010701	MYMX	Female	Cortical surface area (MOSTest)	PMID:32665545	van der Meer D	2020-07-14	26502			6_44073663_G_A	rs72867280	1e-08							0.0375184	FALSE
GCST90011900	MYMX	Female	Serum alkaline phosphatase levels	PMID:33547301	Chen VL	2021-02-05	390964	105030		6_44570402_G_A	rs927485	3e-09	-5.91	-7.86286	-3.95714				0.0357621	FALSE
GCST90018942	MYMX	Female	Serum alkaline phosphatase levels	PMID:34594039	Sakaue S	2021-09-30	463178			6_44570402_G_A	rs927485	4e-11	-0.016	-0.0207486	-0.0112514				0.0357621	FALSE
GCST007815	MYMX	Female	Male-pattern baldness	PMID:28272467	Heilmann-Heimbach S	2017-03-08	22518		10846	6_44691849_C_T	rs4714811	3e-10	-0.16	-0.209787	-0.110213				0.0357594	FALSE
GCST90025964	MYMX	Female	Red blood cell count	PMID:34226706	Barton AR	2021-07-05	445305			6_44078406_C_T	rs9357429	1.3e-09	-0.0172699	-0.0227314	-0.0118084				0.0353801	TRUE
GCST004625	MYMX	Female	Monocyte count	PMID:27863252	Astle WJ	2016-11-17	170721			6_44628384_T_C	rs75492293	1.093e-16	-0.0493241	-0.0609798	-0.0376683				0.0343665	TRUE
GCST002545	MYMX	Female	Ossification of the posterior longitudinal ligament of the spine	PMID:25064007	Nakajima M	2014-07-27	7922	7017	1112	6_44570402_G_A	rs927485	9e-09				0.75188	0.682214	0.828659	0.0342959	FALSE
GCST003983	MYMX	Female	Male-pattern baldness	PMID:27182965	Pickrell JK	2016-05-16	17500		9009	6_44699178_T_C	rs227808	3e-09							0.0337863	FALSE
GCST005996	MYMX	Female	Red blood cell count	PMID:29403010	Kanai M	2018-02-05	108794			6_44063346_T_G	rs833806	1e-09							0.0325914	FALSE
GCST90095129	MYMX	Female	Vertex-wise sulcal depth	PMID:34910505	van der Meer D	2021-12-15	33748			6_44478937_G_A	rs2281690	5e-44	-13.91	-15.869	-11.951				0.0320199	FALSE
NEALE2_20003_1140927320	MYMX	Female	Dermol 500 lotion | treatment/medication code		UKB Neale v2	2018-08-01	361141	0	116	6_44307458_G_T	rs41282670	4.43974e-08				5.63085	3.03213	10.4568	0.0318245	TRUE
GCST011354	MYMX	Female	Bell's palsy	PMID:33602968	Skuladottir AT	2021-02-18	1016234		4714	6_44479861_G_A	rs9357446	7e-23				1.2306	1.18082	1.28249	0.0314781	FALSE
GCST90025998	MYMX	Female	Lung function (FVC)	PMID:34226706	Barton AR	2021-07-05	371898			6_44479861_G_A	rs9357446	1.8e-08	-0.0116539	-0.0157977	-0.00751015				0.0311423	TRUE
GCST004422	MYMX	Female	Vascular endothelial growth factor levels	PMID:27989323	Ahola-Olli AV	2016-12-13	7118			6_43907191_C_T	rs150836197	9.52e-13	0.3647	0.266112	0.463288				0.0305877	TRUE
GCST004422	MYMX	Female	Vascular endothelial growth factor levels	PMID:27989323	Ahola-Olli AV	2016-12-13	7118			6_43965802_C_T	rs143072171	2.63e-20	0.4029	0.31666	0.48914				0.0297649	TRUE
GCST007429	MYMX	Female	Lung function (FVC)	PMID:30804560	Shrine N	2019-02-25	321047	79005		6_44479861_G_A	rs9357446	1.04e-10	-0.0151	-0.019608	-0.010592				0.0288712	TRUE
GCST90025969	MYMX	Female	Hemoglobin levels	PMID:34226706	Barton AR	2021-07-05	445373			6_44056337_C_T	rs78055468	2e-11	-0.0407422	-0.0529133	-0.0285711				0.0288068	TRUE
GCST90018843	MYMX	Female	Bell's palsy	PMID:34594039	Sakaue S	2021-09-30	641774		2237	6_44479861_G_A	rs9357446	9e-09	0.1819	0.11988	0.24392				0.0287819	FALSE
GCST90002304	MYMX	Female	Hematocrit	PMID:32888493	Chen MH	2020-09-01	562259			6_43901249_A_G	rs1539508	1.77e-27	-0.020926	-0.024701	-0.017151				0.0277238	TRUE
GCST90002310	MYMX	Female	Hemoglobin concentration	PMID:32888493	Chen MH	2020-09-01	563946			6_43901249_A_G	rs1539508	4.15e-27	-0.020746	-0.0245151	-0.0169769				0.0277238	TRUE
GCST90002363	MYMX	Female	Red blood cell count	PMID:32888493	Chen MH	2020-09-01	545203			6_43901249_A_G	rs1539508	5.19e-17	-0.016117	-0.0198822	-0.0123518				0.0277238	TRUE
GCST90002383	MYMX	Female	Hematocrit	PMID:32888494	Vuckovic D	2020-09-01	408112			6_43901249_A_G	rs1539508	2.6e-22	-0.0210042	-0.0252412	-0.0167672				0.0277238	TRUE
GCST90002384	MYMX	Female	Hemoglobin	PMID:32888494	Vuckovic D	2020-09-01	408112			6_43901249_A_G	rs1539508	1.9e-21	-0.0205501	-0.0247855	-0.0163147				0.0277238	TRUE
NEALE2_30020_raw	MYMX	Female	Haemoglobin concentration		UKB Neale v2	2018-08-01	350474	0		6_43901249_A_G	rs1539508	9.14386e-16	-0.0190377	-0.0236798	-0.0143956				0.0277238	TRUE
GCST007841	MYMX	Female	Height	PMID:30595370	Kichaev G	2018-12-27	458000			6_43900875_A_G	rs2182380	8e-09							0.0269337	FALSE
GCST90025964	MYMX	Female	Red blood cell count	PMID:34226706	Barton AR	2021-07-05	445305			6_43892359_T_G	rs4530855	1.8e-11	-0.0135192	-0.0174283	-0.00961006				0.0269337	TRUE
GCST90091061	MYMX	Female	Cortical thickness	PMID:34560273	Shadrin AA	2021-09-21	35657			6_44479182_C_A	rs7770012	6e-13							0.0268122	FALSE
GCST007038	MYMX	Female	Balding type 1	PMID:30595370	Kichaev G	2018-12-27	208000			6_44708683_C_T	rs227819	9e-27							0.0263305	FALSE
GCST006979	MYMX	Female	Heel bone mineral density	PMID:30598549	Morris JA	2018-12-31	426824			6_44576254_G_C	rs112570749	9e-15	-0.0358796	-0.0437399	-0.0280193				0.0260012	TRUE
GCST90038601	MYMX	Female	Musculoskeletal disorder or trauma	PMID:33959723	Donertas HM	2021-04-08	484598		106605	6_44481960_G_A	rs12154055	4.9e-08				0.995353	0.993678	0.997032	0.0259294	TRUE
GCST004422	MYMX	Female	Vascular endothelial growth factor levels	PMID:27989323	Ahola-Olli AV	2016-12-13	7118			6_43891524_GT_G	rs980269718	1.224e-16	-0.1563	-0.192756	-0.119844				0.0258197	TRUE
GCST004439	MYMX	Female	Interleukin-12p70 levels	PMID:27989323	Ahola-Olli AV	2016-12-13	8270			6_43891524_GT_G	rs980269718	1.3e-13	-0.1296	-0.163312	-0.095888				0.0258197	TRUE
GCST90025969	MYMX	Female	Hemoglobin levels	PMID:34226706	Barton AR	2021-07-05	445373			6_43892359_T_G	rs4530855	9e-17	-0.0172341	-0.021311	-0.0131572				0.0258197	TRUE
GCST90002397	MYMX	Female	Mean spheric corpuscular volume	PMID:32888494	Vuckovic D	2020-09-01	408112			6_43789345_T_A	rs4711750	3.7e-28	-0.0226136	-0.0266419	-0.0185853				0.025688	TRUE
GCST007081	MYMX	Female	Lung function (FVC)	PMID:30595370	Kichaev G	2018-12-27	372000			6_44479861_G_A	rs9357446	2e-08							0.0251089	FALSE
GCST007093	MYMX	Female	Osteoarthritis	PMID:30664745	Tachmazidou I	2019-01-21	455221		77052	6_44481960_G_A	rs12154055	3e-08				0.970874	0.960776	0.981077	0.0248534	FALSE
GCST90091060	MYMX	Female	Cortical surface area	PMID:34560273	Shadrin AA	2021-09-21	35657			6_44479267_A_G	rs7770034	1e-17							0.0248294	FALSE
GCST90095130	MYMX	Female	Vertex-wise cortical surface area	PMID:34910505	van der Meer D	2021-12-15	33748			6_44479267_A_G	rs7770034	2e-15	-7.96	-9.9246	-5.9954				0.0248294	FALSE
GCST004439	MYMX	Female	Interleukin-12p70 levels	PMID:27989323	Ahola-Olli AV	2016-12-13	8270			6_43965802_C_T	rs143072171	1.5e-14	0.3248	0.24248	0.40712				0.02466	TRUE
GCST004608	MYMX	Female	Granulocyte percentage of myeloid white cells	PMID:27863252	Astle WJ	2016-11-17	169545			6_44623269_T_C	rs11963621	6.933e-10	0.0365666	0.0249461	0.0481871				0.0240285	TRUE
NEALE2_4106_raw	MYMX	Female	Heel bone mineral density (bmd) t-score, automated (left)		UKB Neale v2	2018-08-01	114630	0		6_44713071_A_G	rs227831	1.509e-11	-0.0346475	-0.0447115	-0.0245835				0.0227606	TRUE
GCST010037	MYMX	Female	Vascular endothelial growth factor levels	PMID:32173896	Maffioletti E	2020-03-16	145			6_43957789_A_G	rs4513773	4e-11							0.0227043	FALSE
GCST90002403	MYMX	Female	Red blood cell count	PMID:32888494	Vuckovic D	2020-09-01	408112			6_43901249_A_G	rs1539508	5e-14	-0.0159476	-0.0200977	-0.0117975				0.0226781	TRUE
NEALE2_30010_raw	MYMX	Female	Red blood cell (erythrocyte) count		UKB Neale v2	2018-08-01	350475	0		6_43901249_A_G	rs1539508	4.76328e-10	-0.00527384	-0.00693385	-0.00361383				0.0226781	TRUE
GCST004422	MYMX	Female	Vascular endothelial growth factor levels	PMID:27989323	Ahola-Olli AV	2016-12-13	7118			6_44204360_T_C	rs142167313	6.837e-11	0.2642	0.182664	0.345736				0.0225143	TRUE
GCST004452	MYMX	Female	Interleukin-5 levels	PMID:27989323	Ahola-Olli AV	2016-12-13	3364			6_43959313_A_G	rs7767396	8e-10	-0.1515	-0.199823	-0.103177				0.0225105	FALSE
GCST010036	MYMX	Female	Vascular endothelial growth factor levels in major depressive disorder	PMID:32173896	Maffioletti E	2020-03-16	121			6_43957026_G_A	rs4413611	1e-08							0.0225105	FALSE
GCST010104_58	MYMX	Female	Blood protein levels [VEGFA]	PMID:27532455	Sun W	2016-08-17	1340			6_43951958_C_A	rs9472159	4e-22							0.0225105	FALSE
GCST90090698	MYMX	Female	Serum levels of protein VEGFB	PMID:35078996	Gudjonsson A	2022-01-25	5367			6_43957870_G_A	rs6921438	3e-21	-0.180781	-0.218226	-0.143336				0.0225105	FALSE
GCST005994	MYMX	Female	Hematocrit	PMID:29403010	Kanai M	2018-02-05	108757			6_44010849_A_G	rs73736914	4e-09							0.022418	FALSE
GCST90012111	MYMX	Female	Sex hormone-binding globulin levels	PMID:32042192	Ruth KS	2020-02-10	370125			6_43790159_C_A	rs998584	6.8e-16	-0.00736547	-0.00920088	-0.00553006				0.0221936	TRUE
GCST90018630	MYMX	Female	Gastric polyp	PMID:34594039	Sakaue S	2021-09-30	159586		1337	6_43878343_T_C	rs4714707	1e-08	-0.252211	-0.338472	-0.165951				0.0219021	FALSE
NEALE2_4104_raw	MYMX	Female	Heel quantitative ultrasound index (qui), direct entry (left)		UKB Neale v2	2018-08-01	114630	0		6_44706877_A_G	rs9367207	1.1168e-10	0.603692	0.420268	0.787116				0.0215909	TRUE
GCST004601	MYMX	Female	Red blood cell count	PMID:27863252	Astle WJ	2016-11-17	172952			6_43973400_T_C	rs17287978	6.435e-16	-0.0670582	-0.0833232	-0.0507932				0.0211999	TRUE
GCST90002363	MYMX	Female	Red blood cell count	PMID:32888493	Chen MH	2020-09-01	545203			6_43973400_T_C	rs17287978	2.8e-45	-0.064334	-0.0732579	-0.0554101				0.0211999	TRUE
GCST90002403	MYMX	Female	Red blood cell count	PMID:32888494	Vuckovic D	2020-09-01	408112			6_43973400_T_C	rs17287978	3.3e-39	-0.0638455	-0.0733982	-0.0542928				0.0211999	TRUE
NEALE2_30010_raw	MYMX	Female	Red blood cell (erythrocyte) count		UKB Neale v2	2018-08-01	350475	0		6_43973400_T_C	rs17287978	5.13044e-24	-0.0197375	-0.0235647	-0.0159103				0.0211999	TRUE
GCST004439	MYMX	Female	Interleukin-12p70 levels	PMID:27989323	Ahola-Olli AV	2016-12-13	8270			6_44204360_T_C	rs142167313	3.952e-08	0.2121	0.135072	0.289128				0.0210279	TRUE
GCST90002328	MYMX	Female	Mean corpuscular hemoglobin concentration	PMID:32888493	Chen MH	2020-09-01	491553			6_43789345_T_A	rs4711750	6.73e-09	0.011595	0.00767892	0.0155111				0.0194115	TRUE
GCST004422	MYMX	Female	Vascular endothelial growth factor levels	PMID:27989323	Ahola-Olli AV	2016-12-13	7118			6_43779634_C_T	rs3025007	3.391e-08	0.1022	0.066136	0.138264				0.0193701	TRUE
GCST009538_6	MYMX	Female	White matter microstructure (mean diusivities) [Corticospinal tract ]	PMID:31666681	Zhao B	2019-10-30	17706			6_44714103_G_C	rs227833	2e-08							0.0187933	FALSE
NEALE2_4123_raw	MYMX	Female	Heel quantitative ultrasound index (qui), direct entry (right)		UKB Neale v2	2018-08-01	114614	0		6_44713071_A_G	rs227831	2e-13	-0.658166	-0.833685	-0.482647				0.0184046	TRUE
NEALE2_4125_raw	MYMX	Female	Heel bone mineral density (bmd) t-score, automated (right)		UKB Neale v2	2018-08-01	114614	0		6_44713071_A_G	rs227831	2e-13	-0.037157	-0.047066	-0.027248				0.0184046	TRUE
GCST90025957	MYMX	Female	Triglyceride levels	PMID:34226706	Barton AR	2021-07-05	437532			6_43820678_T_C	rs10046368	2.7e-13	-0.0156521	-0.0198702	-0.011434				0.018133	TRUE
GCST006959	MYMX	Female	Rheumatoid arthritis	PMID:30423114	Laufer VA	2018-11-13	2308	103402	916	6_44266184_C_T	rs2233424	2e-19	0.236603	0.185152	0.288054				0.0181012	FALSE
GCST90025960	MYMX	Female	Mean platelet volume	PMID:34226706	Barton AR	2021-07-05	445364			6_43748257_A_G	rs945131	7.8e-10	-0.0107185	-0.0141613	-0.00727572				0.0180735	TRUE
GCST90012106	MYMX	Female	Sex hormone-binding globulin levels adjusted for BMI	PMID:32042192	Ruth KS	2020-02-10	188908			6_43770093_A_G	rs1570360	1.9e-08	-0.00697222	-0.0095518	-0.00439264				0.0177617	TRUE
GCST90002363	MYMX	Female	Red blood cell count	PMID:32888493	Chen MH	2020-09-01	545203			6_43791136_G_A	rs6905288	7.98e-21	0.017846	0.0141122	0.0215798				0.0177528	TRUE
GCST002318	MYMX	Female	Rheumatoid arthritis	PMID:24390342	Okada Y	2013-12-25	80799	22839	19234	6_44266184_C_T	rs2233424	1e-19				1.26	1.19874	1.32439	0.0172148	FALSE
GCST90018910	MYMX	Female	Rheumatoid arthritis	PMID:34594039	Sakaue S	2021-09-30	595872		13603	6_44261078_A_C	rs28362859	1e-12	0.1465	0.106231	0.186769				0.0171895	FALSE
GCST90012110	MYMX	Female	Sex hormone-binding globulin levels adjusted for BMI	PMID:32042192	Ruth KS	2020-02-10	368929			6_43770093_A_G	rs1570360	2.7e-10	-0.00560092	-0.00734891	-0.00385293				0.0170999	TRUE
GCST90012111	MYMX	Female	Sex hormone-binding globulin levels	PMID:32042192	Ruth KS	2020-02-10	370125			6_43770093_A_G	rs1570360	2.2e-09	-0.00594209	-0.00788993	-0.00399425				0.0170999	TRUE
GCST90002363	MYMX	Female	Red blood cell count	PMID:32888493	Chen MH	2020-09-01	545203			6_43775770_C_T	rs3024994	4.62e-30	-0.049326	-0.0578089	-0.0408431				0.0169585	TRUE
GCST90002363	MYMX	Female	Red blood cell count	PMID:32888493	Chen MH	2020-09-01	545203			6_43780225_A_G	rs3025012	1.67e-34	0.035124	0.0295066	0.0407414				0.0169585	TRUE
GCST90002363	MYMX	Female	Red blood cell count	PMID:32888493	Chen MH	2020-09-01	545203			6_44663608_G_A	rs499374	9.07e-10	0.011461	0.0077958	0.0151262				0.016787	TRUE
NEALE2_30100_raw	MYMX	Female	Mean platelet (thrombocyte) volume		UKB Neale v2	2018-08-01	350470	0		6_44086722_T_C	rs6935537	2.84986e-09	-0.0193587	-0.0257462	-0.0129712				0.0167109	TRUE
GCST004422	MYMX	Female	Vascular endothelial growth factor levels	PMID:27989323	Ahola-Olli AV	2016-12-13	7118			6_43869482_G_A	rs11968259	2.071e-12	0.2539	0.18236	0.32544				0.0166494	TRUE
GCST004439	MYMX	Female	Interleukin-12p70 levels	PMID:27989323	Ahola-Olli AV	2016-12-13	8270			6_43869482_G_A	rs11968259	1.949e-11	0.2333	0.165288	0.301312				0.0166494	TRUE
GCST004627	MYMX	Female	Lymphocyte counts	PMID:27863252	Astle WJ	2016-11-17	171643			6_44605717_C_G	rs4714797	4.429e-08	-0.0203656	-0.0276592	-0.013072				0.0165424	TRUE
GCST90013534	MYMX	Female	Rheumatoid arthritis	PMID:33310728	Ha E	2020-12-11	311292		22628	6_44266184_C_T	rs2233424	7e-26				1.22	1.17563	1.26605	0.0163837	FALSE
GCST90002349	MYMX	Female	Mean platelet volume	PMID:32888493	Chen MH	2020-09-01	484042			6_44104989_T_C	rs57576544	3e-12							0.0163015	FALSE
GCST90002357	MYMX	Female	Platelet count	PMID:32888493	Chen MH	2020-09-01	542827			6_44062274_A_G	rs833805	7.76e-10	-0.019513	-0.0257282	-0.0132978				0.0162719	TRUE
GCST90002400	MYMX	Female	Plateletcrit	PMID:32888494	Vuckovic D	2020-09-01	408112			6_44062274_A_G	rs833805	3.7e-12	-0.0241127	-0.030914	-0.0173114				0.0162719	TRUE
GCST004439	MYMX	Female	Interleukin-12p70 levels	PMID:27989323	Ahola-Olli AV	2016-12-13	8270			6_43825693_T_C	rs6920532	1.527e-10	-0.1596	-0.208796	-0.110404				0.0162452	TRUE
GCST002318_3	MYMX	Female	Rheumatoid arthritis [East Asian]	PMID:24390342	Okada Y	2013-12-25	80799	22839	19234	6_44266184_C_T	rs2233424	2e-13				1.24	1.17086	1.31322	0.0161763	FALSE
GCST90002346	MYMX	Female	Mean platelet volume	PMID:32888493	Chen MH	2020-09-01	460935			6_44104989_T_C	rs57576544	1.86e-13	-0.017607	-0.0222934	-0.0129206				0.0160259	TRUE
GCST90002369	MYMX	Female	Red cell distribution width	PMID:32888493	Chen MH	2020-09-01	531774			6_44153024_C_T	rs116381382	8.87e-11	0.04662	0.0325413	0.0606987				0.0159848	TRUE
GCST007074	MYMX	Female	Red cell distribution width	PMID:30595370	Kichaev G	2018-12-27	445000			6_44136991_G_A	rs187955356	2e-10							0.0158942	FALSE
GCST90025960	MYMX	Female	Mean platelet volume	PMID:34226706	Barton AR	2021-07-05	445364			6_44111093_G_A	rs55772024	2.5e-12	-0.0139628	-0.0179662	-0.00995938				0.0156584	TRUE
GCST90025990	MYMX	Female	Calcium levels	PMID:34226706	Barton AR	2021-07-05	400792			6_44111093_G_A	rs55772024	1.5e-09	-0.0147914	-0.0196811	-0.00990171				0.0156584	TRUE
GCST90025992	MYMX	Female	Serum albumin levels	PMID:34226706	Barton AR	2021-07-05	400938			6_44111093_G_A	rs55772024	3.4e-14	-0.0189768	-0.0238639	-0.0140897				0.0153667	TRUE
GCST90025995	MYMX	Female	Serum total protein level	PMID:34226706	Barton AR	2021-07-05	400482			6_44111093_G_A	rs55772024	1.4e-12	-0.0170956	-0.0219174	-0.0122738				0.0153667	TRUE
NEALE2_23117_raw	MYMX	Female	Leg fat-free mass (left)		UKB Neale v2	2018-08-01	354771	0		6_44712146_C_T	rs1022731	2.19509e-09	0.0179673	0.0120811	0.0238535				0.0153608	TRUE
NEALE2_23118_raw	MYMX	Female	Leg predicted mass (left)		UKB Neale v2	2018-08-01	354766	0		6_44709401_G_A	rs9463011	1.86093e-09	0.0170024	0.0114572	0.0225476				0.0153608	TRUE
GCST90095129	MYMX	Female	Vertex-wise sulcal depth	PMID:34910505	van der Meer D	2021-12-15	33748			6_43858890_C_T	rs943080	7e-64	16.88	14.9193	18.8407				0.0151168	FALSE
GCST90095130	MYMX	Female	Vertex-wise cortical surface area	PMID:34910505	van der Meer D	2021-12-15	33748			6_43858890_C_T	rs943080	8e-26	10.5	8.54135	12.4586				0.0151168	FALSE
GCST90018991	MYMX	Female	Medication use (immunosuppressants)	PMID:34594039	Sakaue S	2021-09-30	451328		7437	6_44266184_C_T	rs2233424	2e-09	0.1578	0.106233	0.209367				0.0149935	FALSE
GCST90018771	MYMX	Female	Medication use (immunosuppressants)	PMID:34594039	Sakaue S	2021-09-30	178726		3483	6_44266884_G_T	rs28362855	4e-09	0.176764	0.117885	0.235644				0.0146773	FALSE
GCST011389	MYMX	Female	Rheumatoid arthritis	PMID:32723749	Kwon YC	2020-07-28	40555		4068	6_44277504_G_C	rs1044690	9e-10							0.0146708	FALSE
GCST90018945	MYMX	Female	Serum albumin levels	PMID:34594039	Sakaue S	2021-09-30	435807			6_44128277_G_A	rs2096199	8e-14	-0.0191	-0.0241113	-0.0140887				0.0146444	FALSE
GCST006959_3	MYMX	Female	Rheumatoid arthritis [EA]	PMID:30423114	Laufer VA	2018-11-13	2308	103402	916	6_44266184_C_T	rs2233424	3e-08	0.2849	0.184131	0.385669				0.014357	FALSE
GCST90002395	MYMX	Female	Mean platelet volume	PMID:32888494	Vuckovic D	2020-09-01	408112			6_44126071_T_G	rs7752653	1.6e-11	-0.0172226	-0.0222303	-0.0122149				0.0143226	TRUE
NEALE2_23108_raw	MYMX	Female	Impedance of leg (left)		UKB Neale v2	2018-08-01	354811	0		6_44073663_G_A	rs72867280	3.52332e-08	-0.496252	-0.67267	-0.319834				0.0142666	TRUE
GCST90002340	MYMX	Female	Monocyte count	PMID:32888493	Chen MH	2020-09-01	521594			6_43725357_G_T	rs11965885	2.09e-08	-0.010796	-0.014569	-0.007023				0.0141181	TRUE
GCST90013684	MYMX	Female	Rheumatoid arthritis	PMID:32514122	Ishigaki K	2020-06-08	212453		4199	6_44281427_C_T	rs80202727	2e-12				1.20408	1.14336	1.26802	0.014023	FALSE
GCST90025959	MYMX	Female	C-reactive protein levels	PMID:34226706	Barton AR	2021-07-05	436939			6_44264337_A_G	rs730775	3.4e-09	-0.0113291	-0.0152905	-0.00736767				0.0138462	TRUE
GCST001884	MYMX	Female	Age-related macular degeneration	PMID:23455636	Fritsche LG	2013-03-03	59494	17761		6_43858890_C_T	rs943080	9e-16				1.15	1.11148	1.18986	0.0137544	FALSE
GCST003219_2	MYMX	Female	Advanced age-related macular degeneration [EA]	PMID:26691988	Fritsche LG	2015-12-21	33976	2933	16144	6_43858890_C_T	rs943080	1e-14							0.0137544	FALSE
GCST010002	MYMX	Female	Refractive error	PMID:32231278	Hysi PG	2020-03-30	542934			6_43860845_T_C	rs4711751	2e-12							0.0137544	FALSE
GCST010723	MYMX	Female	Early age-related macular degeneration	PMID:32843070	Winkler TW	2020-08-26	105248		14034	6_43858890_C_T	rs943080	3.838e-08				1.08296	1.05262	1.11418	0.0137544	TRUE
GCST90091060	MYMX	Female	Cortical surface area	PMID:34560273	Shadrin AA	2021-09-21	35657			6_43860845_T_C	rs4711751	1e-17							0.0137544	FALSE
GCST90018690	MYMX	Female	Rheumatoid arthritis	PMID:34594039	Sakaue S	2021-09-30	178616		5348	6_44261078_A_C	rs28362859	4e-12	0.172117	0.123488	0.220746				0.0134507	FALSE
GCST001454	MYMX	Female	Rheumatoid arthritis	PMID:22446963	Okada Y	2012-03-25	20965	26961	4074	6_44265183_A_G	rs2233434	6e-19				1.19	1.14524	1.23651	0.0133088	FALSE
GCST001100	MYMX	Female	Age-related macular degeneration	PMID:21665990	Yu Y	2011-06-10	6728	57814	2594	6_43860845_T_C	rs4711751	9e-09				0.869565	0.8291	0.912005	0.0132558	FALSE
GCST006959_4	MYMX	Female	Rheumatoid arthritis [East Asian]	PMID:30423114	Laufer VA	2018-11-13	2308	103402	916	6_44266184_C_T	rs2233424	9e-13	0.21291	0.154505	0.271315				0.0131733	FALSE
GCST004625	MYMX	Female	Monocyte count	PMID:27863252	Astle WJ	2016-11-17	170721			6_44264337_A_G	rs730775	5.6e-14	-0.0271208	-0.0341925	-0.0200491				0.0130921	TRUE
GCST001681	MYMX	Female	Rheumatoid arthritis	PMID:23028356	Myouzen K	2012-09-13	5683	37586	2303	6_44265183_A_G	rs2233434	1e-15				1.2	1.14775	1.25463	0.0130618	FALSE
GCST002318_2	MYMX	Female	Rheumatoid arthritis [EA]	PMID:24390342	Okada Y	2013-12-25	80799	22839	19234	6_44266184_C_T	rs2233424	3e-08				1.33	1.20239	1.47115	0.0130618	FALSE
GCST90085816	MYMX	Female	Lymphocyte-to-monocyte ratio	PMID:34469753	Kachuri L	2021-08-26	334468			6_44264337_A_G	rs730775	5e-08							0.0127905	FALSE
GCST90025973	MYMX	Female	Bilirubin levels	PMID:34226706	Barton AR	2021-07-05	436055			6_43774889_T_C	rs833070	1.7e-09	-0.010358	-0.0139258	-0.00679015				0.0125732	TRUE
GCST90002340	MYMX	Female	Monocyte count	PMID:32888493	Chen MH	2020-09-01	521594			6_44264337_A_G	rs730775	3.04e-39	-0.02517	-0.0289312	-0.0214088				0.0121193	TRUE
GCST90002394	MYMX	Female	Monocyte percentage of white cells	PMID:32888494	Vuckovic D	2020-09-01	408112			6_44264337_A_G	rs730775	5.3e-20	-0.0196125	-0.02381	-0.015415				0.0121193	TRUE
GCST90002404	MYMX	Female	Red cell distribution width	PMID:32888494	Vuckovic D	2020-09-01	408112			6_44157217_T_C	rs9394987	3.3e-10	-0.0151349	-0.0198547	-0.0104151				0.0121101	TRUE
GCST90002374	MYMX	Female	White blood cell count	PMID:32888493	Chen MH	2020-09-01	562243			6_44272185_C_T	rs639728	5.99e-10	-0.011686	-0.0153826	-0.00798944				0.0119367	TRUE
GCST010340	MYMX	Female	Total PHF-tau (SNP x SNP interaction)	PMID:32450446	Wang H	2020-04-29	1285			6_44313979_C_T	rs17209560	5e-08							0.0117876	FALSE
GCST007432	MYMX	Female	FEV1	PMID:30804560	Shrine N	2019-02-25	321047	79005		6_44479861_G_A	rs9357446	8.121e-09	-0.0134	-0.017908	-0.008892				0.0116165	TRUE
NEALE2_30190_raw	MYMX	Female	Monocyte percentage		UKB Neale v2	2018-08-01	349861	0		6_44264337_A_G	rs730775	3.0758e-10	-0.0404174	-0.0530015	-0.0278333				0.0113669	TRUE
NEALE2_20003_1140866280	MYMX	Female	Bumetanide | treatment/medication code		UKB Neale v2	2018-08-01	361141	0	300	6_43877731_C_T	rs79003258	3.08815e-08				3.91349	2.41426	6.34372	0.0113617	TRUE
GCST004609	MYMX	Female	Monocyte percentage of white cells	PMID:27863252	Astle WJ	2016-11-17	170494			6_44264337_A_G	rs730775	1.553e-10	-0.0230361	-0.0300908	-0.0159814				0.0112965	TRUE
NEALE2_30130_raw	MYMX	Female	Monocyte count		UKB Neale v2	2018-08-01	349856	0		6_44264337_A_G	rs730775	7.28642e-10	-0.00323255	-0.00426111	-0.00220399				0.0112965	TRUE
GCST003375	MYMX	Female	Glomerular filtration rate (cystatin C)	PMID:26831199	Pattaro C	2016-01-21	32834	14930		6_43855952_T_C	rs6933958	2e-08	0.013	0.008492	0.017508				0.0112197	TRUE
GCST90002369	MYMX	Female	Red cell distribution width	PMID:32888493	Chen MH	2020-09-01	531774			6_44157217_T_C	rs9394987	1.62e-11	-0.0146	-0.0188454	-0.0103546				0.011174	TRUE
SAIGE_740	MYMX	Female	Osteoarthrosis		UKB SAIGE	2018-10-24	408961	0	28439	6_44481960_G_A	rs12154055	2.79e-08				0.949804	0.932684	0.967238	0.0111418	TRUE
GCST90002383	MYMX	Female	Hematocrit	PMID:32888494	Vuckovic D	2020-09-01	408112			6_44661923_A_T	rs535895	3.5e-08	0.0119504	0.00770359	0.0161972				0.0109264	TRUE
NEALE2_5096_raw	MYMX	Female	3mm weak meridian (left)		UKB Neale v2	2018-08-01	75398	0		6_43850100_C_T	rs1536304	1.20206e-08	0.043386	0.0284675	0.0583045				0.0108767	TRUE
GCST008747_2	MYMX	Female	Estimated glomerular filtration rate [EA]	PMID:31451708	Hellwege JN	2019-08-26	280722	765289		6_43852478_A_G	rs68137036	5e-34	0.0047	0.00394251	0.00545749				0.0106497	FALSE
GCST010700	MYMX	Female	Cortical thickness (MOSTest)	PMID:32665545	van der Meer D	2020-07-14	26502			6_43850100_C_T	rs1536304	7e-10							0.0106497	FALSE
GCST010703	MYMX	Female	Brain morphology (MOSTest)	PMID:32665545	van der Meer D	2020-07-14	26502			6_43850100_C_T	rs1536304	7e-12							0.0106497	FALSE
GCST000649_3	MYMX	Female	Chronic kidney disease [eGFRcrea]	PMID:20383146	Kottgen A	2010-04-11	67093	22982		6_43838872_G_A	rs881858	9e-14	-1.08	-1.36395	-0.796049				0.0106411	FALSE
GCST003988	MYMX	Female	Hypothyroidism	PMID:27182965	Pickrell JK	2016-05-16	134641		17558	6_43837765_G_C	rs10223666	5e-10							0.0106411	FALSE
GCST004276	MYMX	Female	Plasma thyroid-stimulating hormone levels	PMID:28333968	Nielsen TR	2017-03-23	1680	2129		6_43837071_G_C	rs2396083	2e-10							0.0106411	FALSE
GCST004292	MYMX	Female	Glomerular filtration rate (creatinine)	PMID:28452372	Gorski M	2017-04-28	110517			6_43838598_T_C	rs1317983	1e-13	-0.008	-0.0101073	-0.00589273				0.0106411	FALSE
GCST006630	MYMX	Female	Diastolic blood pressure	PMID:30224653	Evangelou E	2018-09-17	757601	249262		6_43842065_T_C	rs9472135	2e-18	-0.1444	-0.176719	-0.112081				0.0106411	FALSE
GCST007930	MYMX	Female	Medication use (agents acting on the renin-angiotensin system)	PMID:31015401	Wu Y	2019-04-23	237530		62752	6_43842284_C_T	rs9472136	1e-08	-0.0352042	-0.0472447	-0.0231638				0.0106411	FALSE
GCST90002351	MYMX	Female	Neutrophil count	PMID:32888493	Chen MH	2020-09-01	519288			6_43836834_T_G	rs729761	6.79e-12	0.014756	0.010544	0.018968				0.0106411	TRUE
GCST90002398	MYMX	Female	Neutrophil count	PMID:32888494	Vuckovic D	2020-09-01	408112			6_43836834_T_G	rs729761	2.5e-12	0.0167341	0.01205	0.0214182				0.0106411	TRUE
GCST90002407	MYMX	Female	White blood cell count	PMID:32888494	Vuckovic D	2020-09-01	408112			6_43836834_T_G	rs729761	2e-12	0.0166237	0.0119929	0.0212545				0.0106411	TRUE
GCST90019508	MYMX	Female	Blood glucose levels	PMID:33462484	Sinnott-Armstrong N	2021-01-18	325386			6_43838872_G_A	rs881858	3e-12	-0.0188	-0.0240808	-0.0135192				0.0106411	FALSE
GCST90025945	MYMX	Female	Cystatin C levels	PMID:34226706	Barton AR	2021-07-05	437846			6_43838872_G_A	rs881858	4.6e-109	0.045437	0.0413453	0.0495287				0.0106411	TRUE
GCST90025946	MYMX	Female	Creatinine levels	PMID:34226706	Barton AR	2021-07-05	437660			6_43838872_G_A	rs881858	3.5e-87	0.0423005	0.0380856	0.0465154				0.0106411	TRUE
GCST90025957	MYMX	Female	Triglyceride levels	PMID:34226706	Barton AR	2021-07-05	437532			6_43838872_G_A	rs881858	1.2e-17	0.018167	0.0139765	0.0223575				0.0106411	TRUE
GCST90025964	MYMX	Female	Red blood cell count	PMID:34226706	Barton AR	2021-07-05	445305			6_43838872_G_A	rs881858	3.5e-60	0.0326155	0.0286151	0.0366159				0.0106411	TRUE
GCST90025965	MYMX	Female	Urate levels	PMID:34226706	Barton AR	2021-07-05	437354			6_43838872_G_A	rs881858	4.1e-95	0.0428496	0.0387235	0.0469757				0.0106411	TRUE
GCST90025969	MYMX	Female	Hemoglobin levels	PMID:34226706	Barton AR	2021-07-05	445373			6_43838872_G_A	rs881858	2.4e-64	0.035353	0.031181	0.039525				0.0106411	TRUE
GCST90025986	MYMX	Female	Blood glucose levels	PMID:34226706	Barton AR	2021-07-05	400458			6_43838872_G_A	rs881858	1.8e-18	-0.0203906	-0.0250095	-0.0157717				0.0106411	TRUE
GCST90025996	MYMX	Female	Waist-to-hip ratio adjusted for BMI	PMID:34226706	Barton AR	2021-07-05	458349			6_43838872_G_A	rs881858	3.5e-32	0.0254284	0.0212118	0.029645				0.0106411	TRUE
FINNGEN_R6_AUTOIMMUNE	MYMX	Female	Autoimmune diseases		FINNGEN_R6	2022-01-24	260405	0	52657	6_43837071_G_C	rs2396083	5.77e-09				1.05264	1.03462	1.07097	0.0105942	TRUE
GCST90025991	MYMX	Female	Serum urea levels	PMID:34226706	Barton AR	2021-07-05	437580			6_43838872_G_A	rs881858	2e-08	-0.0122875	-0.0166898	-0.00788522				0.0105942	TRUE
FINNGEN_R6_HYPOTHY_LEVOTHY	MYMX	Female	Hypothyroidism levothyroxin purchases”		FINNGEN_R6	2022-01-24	98164	0	32581	6_43838598_T_C	rs1317983	6e-15				1.1126	1.08315	1.14285	0.0105917	TRUE
FINNGEN_R6_HYPOTHYROIDISM	MYMX	Female	Hypothyroidism (congenital or acquired)		FINNGEN_R6	2022-01-24	98381	0	32925	6_43838598_T_C	rs1317983	3e-15				1.11408	1.08465	1.14431	0.0105917	TRUE
FINNGEN_R6_HYPOTHY_PURCHASE	MYMX	Female	Hypothyroidism and >3 levothyroxin purchases		FINNGEN_R6	2022-01-24	98164	0	32581	6_43838598_T_C	rs1317983	6e-15				1.1126	1.08315	1.14285	0.0105917	TRUE
GCST004601	MYMX	Female	Red blood cell count	PMID:27863252	Astle WJ	2016-11-17	172952			6_43842065_T_C	rs9472135	4.987e-23	-0.0379903	-0.0455254	-0.0304552				0.0105917	TRUE
GCST004604	MYMX	Female	Hematocrit	PMID:27863252	Astle WJ	2016-11-17	173039			6_43842065_T_C	rs9472135	4.421e-24	-0.0386802	-0.0461703	-0.0311901				0.0105917	TRUE
GCST004615	MYMX	Female	Hemoglobin concentration	PMID:27863252	Astle WJ	2016-11-17	172925			6_43842065_T_C	rs9472135	4.577e-21	-0.0361568	-0.0436811	-0.0286325				0.0105917	TRUE
GCST005984	MYMX	Female	Glomerular filtration rate	PMID:29403010	Kanai M	2018-02-05	143658			6_43838872_G_A	rs881858	3e-08							0.0105917	FALSE
GCST005985	MYMX	Female	Creatinine levels	PMID:29403010	Kanai M	2018-02-05	142097			6_43838872_G_A	rs881858	4e-09							0.0105917	FALSE
GCST007344	MYMX	Female	Estimated glomerular filtration rate	PMID:30604766	Morris AP	2019-01-03	312296			6_43838872_G_A	rs881858	3e-22							0.0105917	FALSE
GCST008058	MYMX	Female	Estimated glomerular filtration rate	PMID:31152163	Wuttke M	2019-05-31	765348	280722		6_43838872_G_A	rs881858	5e-67	-0.0054	-0.00601192	-0.00478808				0.0105917	FALSE
GCST008165	MYMX	Female	Thyroid stimulating hormone levels	PMID:25743335	Taylor PN	2015-03-06	16335			6_43837088_A_G	rs2396084	4e-13	0.096	0.0700668	0.121933				0.0105917	FALSE
GCST008971	MYMX	Female	Urate levels	PMID:31578528	Tin A	2019-10-02	288649			6_43837765_G_C	rs10223666	7e-28							0.0105917	FALSE
GCST008972	MYMX	Female	Urate levels	PMID:31578528	Tin A	2019-10-02	457690			6_43837765_G_C	rs10223666	1e-32							0.0105917	FALSE
GCST008973_2	MYMX	Female	Urate levels [women]	PMID:31578528	Tin A	2019-10-02	346213			6_43837765_G_C	rs10223666	3e-15							0.0105917	FALSE
GCST90002363	MYMX	Female	Red blood cell count	PMID:32888493	Chen MH	2020-09-01	545203			6_43837625_T_A	rs744103	4.06e-67	0.034514	0.0306077	0.0384203				0.0105917	TRUE
GCST90018759	MYMX	Female	Serum creatinine levels	PMID:34594039	Sakaue S	2021-09-30	150266			6_43837765_G_C	rs10223666	2e-09							0.0105917	FALSE
GCST90018977	MYMX	Female	Serum uric acid levels	PMID:34594039	Sakaue S	2021-09-30	473241			6_43838598_T_C	rs1317983	3e-50	0.0304	0.0264028	0.0343972				0.0105917	FALSE
GCST90018979	MYMX	Female	Serum creatinine levels	PMID:34594039	Sakaue S	2021-09-30	494370			6_43837765_G_C	rs10223666	8e-68							0.0105917	FALSE
GCST001856_5	MYMX	Female	Thyroid hormone levels [TSH - Females]	PMID:23408906	Porcu E	2013-02-07	26420			6_43844025_C_T	rs9472138	6e-12	-0.09	-0.115641	-0.0643592				0.0105481	FALSE
GCST001856_7	MYMX	Female	Thyroid hormone levels [TSH]	PMID:23408906	Porcu E	2013-02-07	26420			6_43844025_C_T	rs9472138	7e-16	-0.079	-0.0981859	-0.0598141				0.0105481	FALSE
GCST006867	MYMX	Female	Type 2 diabetes	PMID:30054458	Xue A	2018-07-27	659316		62892	6_43843237_G_A	rs9369425	1.129e-10				0.946864	0.93122	0.962771	0.0105481	TRUE
GCST008790	MYMX	Female	Urinary albumin-to-creatinine ratio	PMID:31511532	Teumer A	2019-09-11	564257			6_43850054_A_T	rs3734692	1e-15							0.0105481	FALSE
GCST008794	MYMX	Female	Urinary albumin-to-creatinine ratio	PMID:31511532	Teumer A	2019-09-11	547361			6_43850054_A_T	rs3734692	4e-16							0.0105481	FALSE
GCST008996	MYMX	Female	Waist-hip ratio	PMID:30239722	Pulit SL	2018-09-14	697734			6_43843237_G_A	rs9369425	1e-23	0.0195	0.0156938	0.0233062				0.0105481	FALSE
GCST009379	MYMX	Female	Type 2 diabetes	PMID:30297969	Mahajan A	2018-10-08	898130		74124	6_43846453_C_T	rs6458354	2e-12				0.952381	0.939522	0.965416	0.0105481	FALSE
GCST009550	MYMX	Female	Priapism in sickle cell disease	PMID:31668730	Cintho Ozahata M	2019-10-24	602			6_43846990_C_T	rs77635018	9e-09							0.0105481	FALSE
GCST009640	MYMX	Female	Urinary albumin-to-creatinine ratio [EA]	PMID:31630189	Casanova F	2019-10-20	437027	60130		6_43850054_A_T	rs3734692	2e-13							0.0105481	FALSE
GCST010557	MYMX	Female	Type 2 diabetes	PMID:32541925	Vujkovic M	2020-06-15	1407282		228499	6_43845974_G_C	rs9472139	1e-17							0.0105481	FALSE
GCST90002374	MYMX	Female	White blood cell count	PMID:32888493	Chen MH	2020-09-01	562243			6_43847627_G_A	rs6937438	3.94e-13	0.014707	0.010738	0.018676				0.0105481	TRUE
GCST90002385	MYMX	Female	High light scatter reticulocyte count	PMID:32888494	Vuckovic D	2020-09-01	408112			6_43842849_T_TTC	rs201327451	5.9e-09	0.0135002	0.00895304	0.0180474				0.0105481	TRUE
GCST90002405	MYMX	Female	Reticulocyte count	PMID:32888494	Vuckovic D	2020-09-01	408112			6_43842849_T_TTC	rs201327451	2.7e-09	0.0138826	0.00931039	0.0184548				0.0105481	TRUE
GCST90018968	MYMX	Female	Neutrophil count	PMID:34594039	Sakaue S	2021-09-30	432666			6_43842732_C_T	rs9472137	2e-10	0.0157	0.0108627	0.0205373				0.0105481	FALSE
GCST90018978	MYMX	Female	White blood cell count	PMID:34594039	Sakaue S	2021-09-30	504825			6_43842732_C_T	rs9472137	1e-11	0.0159	0.0113214	0.0204786				0.0105481	FALSE
GCST90025970	MYMX	Female	High light scatter reticulocyte count	PMID:34226706	Barton AR	2021-07-05	437723			6_43844025_C_T	rs9472138	3.7e-08	-0.0119123	-0.0161155	-0.00770906				0.0105481	TRUE
GCST90025972	MYMX	Female	Reticulocyte count	PMID:34226706	Barton AR	2021-07-05	437291			6_43844025_C_T	rs9472138	4.6e-09	-0.0123692	-0.0166058	-0.00813256				0.0105481	TRUE
GCST90025977	MYMX	Female	Neutrophil count	PMID:34226706	Barton AR	2021-07-05	443782			6_43844025_C_T	rs9472138	3.4e-10	-0.0136746	-0.0179872	-0.00936199				0.0105481	TRUE
GCST90025980	MYMX	Female	Aspartate aminotransferase levels	PMID:34226706	Barton AR	2021-07-05	436275			6_43844025_C_T	rs9472138	1.3e-10	-0.0146166	-0.0190285	-0.0102047				0.0105481	TRUE
GCST90025985	MYMX	Female	White blood cell count	PMID:34226706	Barton AR	2021-07-05	444734			6_43844025_C_T	rs9472138	5.4e-10	-0.0136671	-0.017915	-0.00941917				0.0105481	TRUE
GCST90091061	MYMX	Female	Cortical thickness	PMID:34560273	Shadrin AA	2021-09-21	35657			6_43848640_C_T	rs2025704	1e-17							0.0105481	FALSE
GCST90094952	MYMX	Female	Fasting insulin adjusted for BMI	PMID:34951656	Downie CG	2021-12-24	48395			6_43851205_C_T	rs9472142	6e-10	-0.0462	-0.0608277	-0.0315723				0.0105481	FALSE
GCST90095131	MYMX	Female	Vertex-wise cortical thickness	PMID:34910505	van der Meer D	2021-12-15	33748			6_43848640_C_T	rs2025704	2e-18	-8.78	-10.7451	-6.81492				0.0105481	FALSE
NEALE2_30140_raw	MYMX	Female	Neutrophill count		UKB Neale v2	2018-08-01	349856	0		6_43843237_G_A	rs9369425	1.37954e-09	0.0223093	0.0150914	0.0295272				0.0105481	TRUE
GCST003372	MYMX	Female	Glomerular filtration rate (creatinine)	PMID:26831199	Pattaro C	2016-01-21	133413	100933		6_43838872_G_A	rs881858	8e-15	-0.0081	-0.01006	-0.00614				0.010545	TRUE
GCST007070	MYMX	Female	White blood cell count	PMID:30595370	Kichaev G	2018-12-27	444000			6_43836834_T_G	rs729761	1e-11							0.010514	FALSE
FINNGEN_R6_E4_HYTHY_AI_STRICT	MYMX	Female	Hypothyroidism strict autoimmune”		FINNGEN_R6	2022-01-24	235230	0	28688	6_43837071_G_C	rs2396083	2.98e-23				1.12028	1.09545	1.14567	0.0104809	TRUE
GCST001791	MYMX	Female	Urate levels	PMID:23263486	Kottgen A	2012-12-23	110347	32813		6_43836834_T_G	rs729761	3.053e-12	0.046	0.033652	0.058348				0.0104809	TRUE
GCST90002304	MYMX	Female	Hematocrit	PMID:32888493	Chen MH	2020-09-01	562259			6_43837625_T_A	rs744103	2.07e-84	0.038883	0.0349689	0.0427971				0.0104809	TRUE
GCST90002310	MYMX	Female	Hemoglobin concentration	PMID:32888493	Chen MH	2020-09-01	563946			6_43837625_T_A	rs744103	4.08e-75	0.036599	0.0326888	0.0405092				0.0104809	TRUE
GCST90002383	MYMX	Female	Hematocrit	PMID:32888494	Vuckovic D	2020-09-01	408112			6_43837071_G_C	rs2396083	2.3e-69	0.0406073	0.0360861	0.0451285				0.0104809	TRUE
GCST90002384	MYMX	Female	Hemoglobin	PMID:32888494	Vuckovic D	2020-09-01	408112			6_43837071_G_C	rs2396083	9.5e-61	0.0379149	0.0333954	0.0424344				0.0104809	TRUE
GCST90002403	MYMX	Female	Red blood cell count	PMID:32888494	Vuckovic D	2020-09-01	408112			6_43837071_G_C	rs2396083	1.5e-57	0.0361318	0.031703	0.0405606				0.0104809	TRUE
NEALE2_30020_raw	MYMX	Female	Haemoglobin concentration		UKB Neale v2	2018-08-01	350474	0		6_43837625_T_A	rs744103	1.5645e-41	0.0339652	0.0290346	0.0388958				0.0104809	TRUE
NEALE2_30030_raw	MYMX	Female	Haematocrit percentage		UKB Neale v2	2018-08-01	350475	0		6_43837625_T_A	rs744103	4.03666e-45	0.104568	0.09003	0.119106				0.0104809	TRUE
GCST008745	MYMX	Female	Estimated glomerular filtration rate in non-diabetics	PMID:31451708	Hellwege JN	2019-08-26	188993			6_43837765_G_C	rs10223666	1e-18							0.0104691	FALSE
GCST010637	MYMX	Female	Urate levels	PMID:31985003	Boocock J	2020-01-27	131709			6_43836834_T_G	rs729761	8e-13	0.044	0.0319573	0.0560427				0.0104205	FALSE
GCST007877	MYMX	Female	Creatinine levels	PMID:31015462	Graham SE	2019-04-23	69591			6_43836834_T_G	rs729761	2e-11	0.045306	0.0320642	0.0585478				0.010412	FALSE
GCST90018955	MYMX	Female	Glucose levels	PMID:34594039	Sakaue S	2021-09-30	448252			6_43837765_G_C	rs10223666	5e-14							0.010412	FALSE
GCST90012107	MYMX	Female	Sex hormone-binding globulin levels	PMID:32042192	Ruth KS	2020-02-10	189473			6_43792590_C_G	rs11967262	3.9e-12	-0.00941338	-0.0122043	-0.00662246				0.0103113	TRUE
GCST90012108	MYMX	Female	Sex hormone-binding globulin levels adjusted for BMI	PMID:32042192	Ruth KS	2020-02-10	180094			6_43790159_C_A	rs998584	9.4e-10	-0.0064769	-0.00874666	-0.00420714				0.010117	TRUE
GCST90025947	MYMX	Female	Serum alkaline phosphatase levels	PMID:34226706	Barton AR	2021-07-05	437896			6_44264337_A_G	rs730775	3.2e-08	-0.0103676	-0.0140927	-0.00664248				0.0100892	TRUE
NEALE2_23108_raw	MYMX	Female	Impedance of leg (left)		UKB Neale v2	2018-08-01	354811	0		6_43790159_C_A	rs998584	2.10582e-10	0.486331	0.336305	0.636357				0.0100619	TRUE
NEALE2_30010_raw	MYMX	Female	Red blood cell (erythrocyte) count		UKB Neale v2	2018-08-01	350475	0		6_43780225_A_G	rs3025012	1.17894e-21	0.0120101	0.00954791	0.0144723				0.0100228	TRUE
GCST90025981	MYMX	Female	Diastolic blood pressure	PMID:34226706	Barton AR	2021-07-05	422713			6_43838872_G_A	rs881858	2.6e-16	0.0173001	0.012968	0.0216322				0.00996668	TRUE
GCST003401	MYMX	Female	Glomerular filtration rate in non diabetics (creatinine)	PMID:26831199	Pattaro C	2016-01-21	118448	36433		6_43842065_T_C	rs9472135	3.3e-14	0.0079	0.00594	0.00986				0.00992039	TRUE
GCST003790	MYMX	Female	Glomerular filtration rate	PMID:27588450	Mahajan A	2016-09-01	71638			6_43838872_G_A	rs881858	2e-09	-0.772	-1.02428	-0.519721				0.00992039	FALSE
GCST90016670	MYMX	Female	Kidney volume	PMID:34128465	Liu Y	2021-06-15	32860			6_43837625_T_A	rs744103	2.2e-11	-0.0454714	-0.0587945	-0.0321483				0.00992039	TRUE
GCST90018862	MYMX	Female	Hypothyroidism	PMID:34594039	Sakaue S	2021-09-30	583911		31269	6_43836366_A_AGTCGGT	rs140626545	2e-10	0.0708	0.0489857	0.0926143				0.00984041	FALSE
FINNGEN_R6_E4_HYTHYNAS	MYMX	Female	Hypothyroidism other/unspecified”		FINNGEN_R6	2022-01-24	254846	0	32871	6_43836366_A_AGTCGGT	rs140626545	2e-19				1.1015	1.07858	1.1249	0.00973732	TRUE
FINNGEN_R6_E4_HYTHY_AI_STRICT_PURCH	MYMX	Female	Hypothyroidism strict autoimmune 3 medication purchases required”		FINNGEN_R6	2022-01-24	260405	0	32581	6_43836366_A_AGTCGGT	rs140626545	6.63e-20				1.10306	1.08009	1.12653	0.00973732	TRUE
FINNGEN_R6_E4_THYROID	MYMX	Female	Disorders of the thyroid gland		FINNGEN_R6	2022-01-24	260405	0	38430	6_43836366_A_AGTCGGT	rs140626545	5.84e-12				1.07058	1.04999	1.09157	0.00973732	TRUE
NEALE2_30010_raw	MYMX	Female	Red blood cell (erythrocyte) count		UKB Neale v2	2018-08-01	350475	0		6_43836366_A_AGTCGGT	rs140626545	2.01687e-37	0.0117327	0.00993408	0.0135313				0.00973732	TRUE
GCST004601	MYMX	Female	Red blood cell count	PMID:27863252	Astle WJ	2016-11-17	172952			6_43834168_CT_C	rs753458146	3.43e-13	0.0359103	0.0262374	0.0455833				0.00961762	TRUE
GCST004604	MYMX	Female	Hematocrit	PMID:27863252	Astle WJ	2016-11-17	173039			6_43834168_CT_C	rs753458146	6e-15	0.0382733	0.0286569	0.0478896				0.00961762	TRUE
GCST004615	MYMX	Female	Hemoglobin concentration	PMID:27863252	Astle WJ	2016-11-17	172925			6_43834168_CT_C	rs753458146	2.92e-13	0.0359653	0.0263061	0.0456244				0.00961762	TRUE
GCST90002304	MYMX	Female	Hematocrit	PMID:32888493	Chen MH	2020-09-01	562259			6_43833917_C_T	rs62401198	1.35e-48	-0.037702	-0.0427431	-0.0326609				0.00961762	TRUE
GCST90002310	MYMX	Female	Hemoglobin concentration	PMID:32888493	Chen MH	2020-09-01	563946			6_43833917_C_T	rs62401198	2.74e-41	-0.034608	-0.0396452	-0.0295708				0.00961762	TRUE
GCST90002363	MYMX	Female	Red blood cell count	PMID:32888493	Chen MH	2020-09-01	545203			6_43833917_C_T	rs62401198	3.68e-40	-0.034055	-0.0390844	-0.0290256				0.00961762	TRUE
GCST90002383	MYMX	Female	Hematocrit	PMID:32888494	Vuckovic D	2020-09-01	408112			6_43834141_C_T	rs2894536	2.2e-40	0.0390692	0.0333137	0.0448247				0.00961762	TRUE
GCST90002384	MYMX	Female	Hemoglobin	PMID:32888494	Vuckovic D	2020-09-01	408112			6_43833845_C_T	rs12660375	1.6e-38	-0.0395996	-0.0455796	-0.0336196				0.00961762	TRUE
GCST90002403	MYMX	Female	Red blood cell count	PMID:32888494	Vuckovic D	2020-09-01	408112			6_43833917_C_T	rs62401198	1.1e-32	-0.034079	-0.0396885	-0.0284695				0.00961762	TRUE
GCST90025964	MYMX	Female	Red blood cell count	PMID:34226706	Barton AR	2021-07-05	445305			6_43833917_C_T	rs62401198	4.3e-40	-0.0338399	-0.0389226	-0.0287572				0.00961762	TRUE
GCST90025969	MYMX	Female	Hemoglobin levels	PMID:34226706	Barton AR	2021-07-05	445373			6_43833917_C_T	rs62401198	5.8e-40	-0.0351591	-0.0404602	-0.029858				0.00961762	TRUE
GCST90025974	MYMX	Female	Hemoglobin A1c levels	PMID:34226706	Barton AR	2021-07-05	437749			6_43833917_C_T	rs62401198	2.4e-12	0.0187413	0.0134876	0.023995				0.00961762	TRUE
GCST90025986	MYMX	Female	Blood glucose levels	PMID:34226706	Barton AR	2021-07-05	400458			6_43833917_C_T	rs62401198	2.7e-09	0.0179143	0.0120506	0.023778				0.00961762	TRUE
NEALE2_30010_raw	MYMX	Female	Red blood cell (erythrocyte) count		UKB Neale v2	2018-08-01	350475	0		6_43833917_C_T	rs62401198	3.6716e-26	-0.0121247	-0.0143706	-0.00987881				0.00961762	TRUE
NEALE2_30020_raw	MYMX	Female	Haemoglobin concentration		UKB Neale v2	2018-08-01	350474	0		6_43833845_C_T	rs12660375	8.65976e-32	-0.0392901	-0.045853	-0.0327272				0.00961762	TRUE
NEALE2_30030_raw	MYMX	Female	Haematocrit percentage		UKB Neale v2	2018-08-01	350475	0		6_43833845_C_T	rs12660375	3.77292e-33	-0.11844	-0.137791	-0.0990888				0.00961762	TRUE
GCST90025956	MYMX	Female	HDL cholesterol levels	PMID:34226706	Barton AR	2021-07-05	400754			6_43838872_G_A	rs881858	2.1e-10	-0.0137578	-0.017954	-0.00956158				0.00941469	TRUE
GCST010244	MYMX	Female	Triglyceride levels	PMID:32203549	Richardson TG	2020-03-23	441016			6_43836834_T_G	rs729761	1e-15	0.0177746	0.0134344	0.0221148				0.00937094	FALSE
NEALE2_23118_raw	MYMX	Female	Leg predicted mass (left)		UKB Neale v2	2018-08-01	354766	0		6_43790159_C_A	rs998584	2.61136e-08	-0.0149742	-0.0202474	-0.00970104				0.00932313	TRUE
NEALE2_23117_raw	MYMX	Female	Leg fat-free mass (left)		UKB Neale v2	2018-08-01	354771	0		6_43790159_C_A	rs998584	3.27513e-08	-0.0158563	-0.0214801	-0.0102325				0.00924622	TRUE
NEALE2_30030_raw	MYMX	Female	Haematocrit percentage		UKB Neale v2	2018-08-01	350475	0		6_43901249_A_G	rs1539508	2e-15	-0.0553663	-0.0690539	-0.0416787				0.00914081	TRUE
GCST90000059	MYMX	Female	Diastolic blood pressure	PMID:33230300	Surendran P	2020-11-23	810865	354096		6_43838872_G_A	rs881858	4.953e-17	0.014266	0.0109324	0.0175996				0.00870503	TRUE
GCST007733	MYMX	Female	Serum uric acid levels [EA]	PMID:30993211	Nakatochi M	2019-04-08	210206			6_43837625_T_A	rs744103	5e-13							0.00867792	FALSE
GCST008059	MYMX	Female	Estimated glomerular filtration rate	PMID:31152163	Wuttke M	2019-05-31	567460	216518		6_43838872_G_A	rs881858	7e-62	-0.0056	-0.00626122	-0.00493878				0.00867792	FALSE
GCST90019504	MYMX	Female	Cystatin C levels	PMID:33462484	Sinnott-Armstrong N	2021-01-18	355752			6_43838872_G_A	rs881858	9e-56	0.0405	0.0354545	0.0455455				0.00867792	FALSE
GCST90019506	MYMX	Female	Estimated glomerular filtration rate	PMID:33462484	Sinnott-Armstrong N	2021-01-18	355731			6_43838872_G_A	rs881858	1e-59	-0.0418	-0.0468265	-0.0367735				0.0086054	FALSE
GCST011369	MYMX	Female	Iron status biomarkers (ferritin levels)	PMID:33536631	Bell S	2021-02-03	246139			6_43813355_T_G	rs36184164	6e-12	0.036	0.0257437	0.0462563				0.00858575	FALSE
GCST90025956	MYMX	Female	HDL cholesterol levels	PMID:34226706	Barton AR	2021-07-05	400754			6_43813355_T_G	rs36184164	4.8e-09	-0.0185248	-0.0245847	-0.0124649				0.00858575	TRUE
GCST90025984	MYMX	Female	Lymphocyte counts	PMID:34226706	Barton AR	2021-07-05	443762			6_43820678_T_C	rs10046368	2.4e-09	-0.0123794	-0.0165904	-0.00816844				0.00858575	TRUE
GCST90025996	MYMX	Female	Waist-to-hip ratio adjusted for BMI	PMID:34226706	Barton AR	2021-07-05	458349			6_43813355_T_G	rs36184164	4.8e-08	0.0162544	0.0101634	0.0223454				0.00858575	TRUE
GCST90019524	MYMX	Female	Urate levels	PMID:33462484	Sinnott-Armstrong N	2021-01-18	355426			6_43838872_G_A	rs881858	2e-46	0.0369	0.0318446	0.0419554				0.00854198	FALSE
GCST007069	MYMX	Female	Red blood cell count	PMID:30595370	Kichaev G	2018-12-27	445000			6_43837625_T_A	rs744103	5e-55							0.00853089	FALSE
GCST007876	MYMX	Female	Estimated glomerular filtration rate	PMID:31015462	Graham SE	2019-04-23	350514			6_43838872_G_A	rs881858	3e-28	-11.033	-12.995	-9.07101				0.00853089	FALSE
GCST008973	MYMX	Female	Urate levels [men]	PMID:31578528	Tin A	2019-10-02	346213			6_43837765_G_C	rs10223666	1e-12							0.00853089	FALSE
GCST011119	MYMX	Female	Urate levels	PMID:33356394	Gill D	2020-12-28	454183			6_43837625_T_A	rs744103	2e-57							0.00853089	FALSE
GCST011521	MYMX	Female	Urate levels	PMID:33587031	Sinnott-Armstrong N	2021-02-15	318526			6_43837071_G_C	rs2396083	7e-44							0.00853089	FALSE
GCST90019502	MYMX	Female	Creatinine levels	PMID:33462484	Sinnott-Armstrong N	2021-01-18	355731			6_43838872_G_A	rs881858	3e-62	0.0428	0.0377618	0.0478382				0.00853089	FALSE
SAIGE_401	MYMX	Female	Hypertension		UKB SAIGE	2018-10-24	408343	0	77977	6_43842284_C_T	rs9472136	1.02e-08				0.963098	0.950775	0.975581	0.00853089	TRUE
SAIGE_401_1	MYMX	Female	Essential hypertension		UKB SAIGE	2018-10-24	408089	0	77723	6_43842284_C_T	rs9472136	1.4e-08				0.963387	0.951042	0.975892	0.00853089	TRUE
GCST90002304	MYMX	Female	Hematocrit	PMID:32888493	Chen MH	2020-09-01	562259			6_43780225_A_G	rs3025012	6.15e-45	0.040464	0.034829	0.046099				0.0082756	TRUE
NEALE2_30000_raw	MYMX	Female	White blood cell (leukocyte) count		UKB Neale v2	2018-08-01	350470	0		6_43844025_C_T	rs9472138	9.5066e-09	-0.0305287	-0.0409542	-0.0201032				0.0079553	TRUE
GCST90025957	MYMX	Female	Triglyceride levels	PMID:34226706	Barton AR	2021-07-05	437532			6_43785588_G_A	rs3025053	1e-15	-0.024728	-0.030748	-0.018708				0.00795426	TRUE
GCST90002383	MYMX	Female	Hematocrit	PMID:32888494	Vuckovic D	2020-09-01	408112			6_43799192_C_T	rs114142949	6.8e-24	-0.060743	-0.0725551	-0.0489309				0.00791061	TRUE
GCST004614	MYMX	Female	Granulocyte count	PMID:27863252	Astle WJ	2016-11-17	169822			6_43789345_T_A	rs4711750	1.384e-08	0.0203	0.0132893	0.0273106				0.00741407	TRUE
NEALE2_23107_raw	MYMX	Female	Impedance of leg (right)		UKB Neale v2	2018-08-01	354817	0		6_43790159_C_A	rs998584	2.45209e-10	0.485132	0.334921	0.635343				0.00741407	TRUE
GCST004422	MYMX	Female	Vascular endothelial growth factor levels	PMID:27989323	Ahola-Olli AV	2016-12-13	7118			6_43825693_T_C	rs6920532	8.676e-12	-0.1803	-0.232632	-0.127968				0.00721408	TRUE
NEALE2_6150_100	MYMX	Female	None of the above | vascular/heart problems diagnosed by doctor		UKB Neale v2	2018-08-01	360420	0	106855	6_43791136_G_A	rs6905288	1.25392e-08				0.971835	0.962322	0.981442	0.0070721	TRUE
GCST011049	MYMX	Female	Prostate cancer	PMID:33398198	Conti DV	2021-01-04	234253		107247	6_43742048_C_T	rs9472120	3e-09				0.962464	0.950373	0.974709	0.00703508	FALSE
GCST002063_6	MYMX	Female	Sexual dimorphism in anthropometric traits [WHRadjBMI, women]	PMID:23754948	Randall JC	2013-06-06	133723	137052		6_43796814_C_T	rs1358980	2e-11							0.0070344	FALSE
GCST002782	MYMX	Female	Waist-to-hip ratio adjusted for body mass index	PMID:25673412	Shungin D	2015-02-12	142762	80837		6_43796814_C_T	rs1358980	1e-26	0.0376	0.0307136	0.0444864				0.0070344	FALSE
GCST002782_3	MYMX	Female	Waist-to-hip ratio adjusted for body mass index [EA, women]	PMID:25673412	Shungin D	2015-02-12	142762	80837		6_43796814_C_T	rs1358980	4e-34	0.0595	0.0499249	0.0690751				0.0070344	FALSE
GCST002782_4	MYMX	Female	Waist-to-hip ratio adjusted for body mass index [EA]	PMID:25673412	Shungin D	2015-02-12	142762	80837		6_43796814_C_T	rs1358980	3e-27	0.0392	0.0320942	0.0463058				0.0070344	FALSE
GCST002782_6	MYMX	Female	Waist-to-hip ratio adjusted for body mass index [women]	PMID:25673412	Shungin D	2015-02-12	142762	80837		6_43796814_C_T	rs1358980	2e-33	0.0579	0.0484803	0.0673197				0.0070344	FALSE
GCST004064_3	MYMX	Female	Waist-hip ratio [EA, women]	PMID:25673412	Shungin D	2015-02-12	142762	80837		6_43796814_C_T	rs1358980	2e-24	0.0486	0.0392604	0.0579396				0.0070344	FALSE
GCST004064_4	MYMX	Female	Waist-hip ratio [EA]	PMID:25673412	Shungin D	2015-02-12	142762	80837		6_43796814_C_T	rs1358980	2e-14	0.027	0.0200829	0.0339171				0.0070344	FALSE
GCST004505	MYMX	Female	Waist-to-hip ratio adjusted for BMI (adjusted for smoking behaviour)	PMID:28443625	Justice AE	2017-04-26	191661	167694		6_43796814_C_T	rs1358980	2e-22	0.0363	0.0289966	0.0436034				0.0070344	FALSE
GCST004505_8	MYMX	Female	Waist-to-hip ratio adjusted for BMI (adjusted for smoking behaviour) [women]	PMID:28443625	Justice AE	2017-04-26	191661	167694		6_43796814_C_T	rs1358980	2e-26	0.0532	0.0433974	0.0630026				0.0070344	FALSE
GCST004507_3	MYMX	Female	Waist-to-hip ratio adjusted for BMI (joint analysis main effects and smoking interaction) [women]	PMID:28443625	Justice AE	2017-04-26	189057	167694		6_43796814_C_T	rs1358980	3e-08							0.0070344	FALSE
GCST004508_7	MYMX	Female	Waist-to-hip ratio adjusted for BMI in non-smokers [women]	PMID:28443625	Justice AE	2017-04-26	149672	141861		6_43796814_C_T	rs1358980	2e-08	0.0193	0.0125594	0.0260406				0.0070344	FALSE
GCST004562_4	MYMX	Female	Waist circumference adjusted for body mass index [EA]	PMID:28448500	Graff M	2017-04-27	159510	44060		6_43796814_C_T	rs1358980	7e-16	0.0323	0.0244556	0.0401444				0.0070344	FALSE
GCST004563_4	MYMX	Female	Waist circumference adjusted for BMI (joint analysis main effects and physical activity interaction) [EA]	PMID:28448500	Graff M	2017-04-27	159510	44060		6_43796814_C_T	rs1358980	2e-16							0.0070344	FALSE
GCST004564_4	MYMX	Female	Waist circumference adjusted for BMI in active individuals [EA]	PMID:28448500	Graff M	2017-04-27	122328	31959		6_43796814_C_T	rs1358980	3e-11	0.0305	0.0215059	0.0394941				0.0070344	FALSE
GCST004565_2	MYMX	Female	Waist circumference adjusted for BMI in inactive individuals [EA, women]	PMID:28448500	Graff M	2017-04-27	38471	12101		6_43796814_C_T	rs1358980	4e-10	0.0699	0.0479935	0.0918065				0.0070344	FALSE
GCST004567_4	MYMX	Female	Waist-to-hip ratio adjusted for BMI (joint analysis for main effect and physical activity interaction) [EA]	PMID:28448500	Graff M	2017-04-27	155688	44060		6_43796814_C_T	rs1358980	1e-20							0.0070344	FALSE
GCST004576_3	MYMX	Female	Waist-to-hip ratio adjusted for body mass index [EA, women]	PMID:28448500	Graff M	2017-04-27	155688	44060		6_43796814_C_T	rs1358980	4e-21	0.0531	0.0420664	0.0641336				0.0070344	FALSE
GCST004576_4	MYMX	Female	Waist-to-hip ratio adjusted for body mass index [EA]	PMID:28448500	Graff M	2017-04-27	155688	44060		6_43796814_C_T	rs1358980	1e-20	0.0401	0.0316814	0.0485186				0.0070344	FALSE
GCST004578_4	MYMX	Female	Waist-to-hip ratio adjusted for BMI in active individuals [EA]	PMID:28448500	Graff M	2017-04-27	119301	31959		6_43796814_C_T	rs1358980	1e-18	0.0428	0.0333052	0.0522948				0.0070344	FALSE
GCST008052	MYMX	Female	Waist-hip ratio	PMID:31217584	Wojcik GL	2019-06-19	33904			6_43796814_C_T	rs1358980	2e-10							0.0070344	FALSE
GCST010241	MYMX	Female	Apolipoprotein A1 levels	PMID:32203549	Richardson TG	2020-03-23	393193			6_43796622_C_T	rs12204488	3e-09	0.0135932	0.00910155	0.0180849				0.0070344	FALSE
GCST010243	MYMX	Female	Apolipoprotein B levels	PMID:32203549	Richardson TG	2020-03-23	439214			6_43796814_C_T	rs1358980	7e-13	0.0150327	0.0109287	0.0191367				0.0070344	FALSE
GCST90002378	MYMX	Female	White blood cell count	PMID:32888493	Chen MH	2020-09-01	746667			6_43796814_C_T	rs1358980	4e-17							0.0070344	FALSE
GCST90002398	MYMX	Female	Neutrophil count	PMID:32888494	Vuckovic D	2020-09-01	408112			6_43796814_C_T	rs1358980	1.3e-11	0.0146309	0.0103913	0.0188705				0.0070344	TRUE
NEALE2_30030_raw	MYMX	Female	Haematocrit percentage		UKB Neale v2	2018-08-01	350475	0		6_43779641_G_A	rs3025049	4.96795e-08	-0.148244	-0.201532	-0.0949559				0.00702757	TRUE
GCST90002384	MYMX	Female	Hemoglobin	PMID:32888494	Vuckovic D	2020-09-01	408112			6_43799192_C_T	rs114142949	1.5e-25	-0.0629463	-0.074753	-0.0511396				0.0070084	TRUE
GCST90002357	MYMX	Female	Platelet count	PMID:32888493	Chen MH	2020-09-01	542827			6_43790748_C_T	rs6900017	1.54e-11	-0.023113	-0.029824	-0.016402				0.0069977	TRUE
GCST90002403	MYMX	Female	Red blood cell count	PMID:32888494	Vuckovic D	2020-09-01	408112			6_43780225_A_G	rs3025012	3.1e-29	0.0353047	0.0291395	0.0414699				0.00697618	TRUE
GCST002897	MYMX	Female	Triglycerides	PMID:25961943	Surakka I	2015-05-11	62166			6_43796814_C_T	rs1358980	4e-09	0.039	0.0260093	0.0519907				0.00697551	FALSE
GCST006005	MYMX	Female	High density lipoprotein cholesterol levels	PMID:29403010	Kanai M	2018-02-05	70657			6_43796814_C_T	rs1358980	3e-09							0.00697551	FALSE
GCST90002407	MYMX	Female	White blood cell count	PMID:32888494	Vuckovic D	2020-09-01	408112			6_43796814_C_T	rs1358980	1e-11	0.0145411	0.0103496	0.0187326				0.00697551	TRUE
GCST90018736	MYMX	Female	HDL cholesterol	PMID:34594039	Sakaue S	2021-09-30	74970			6_43796814_C_T	rs1358980	8e-11	-0.0307686	-0.0400457	-0.0214915				0.00697551	FALSE
NEALE2_23119_raw	MYMX	Female	Arm fat percentage (right)		UKB Neale v2	2018-08-01	354760	0		6_43796814_C_T	rs1358980	1.3239e-11	-0.120496	-0.1554	-0.0855915				0.00697551	TRUE
GCST004626	MYMX	Female	Myeloid white cell count	PMID:27863252	Astle WJ	2016-11-17	169219			6_43789345_T_A	rs4711750	6.712e-09	0.0207902	0.0137621	0.0278183				0.00693701	TRUE
GCST90038604	MYMX	Female	Hypertension	PMID:33959723	Donertas HM	2021-04-08	484598		129909	6_43791136_G_A	rs6905288	4.8e-11				1.00546	1.0038	1.00712	0.00693701	TRUE
NEALE2_4119_raw	MYMX	Female	Ankle spacing width (right)		UKB Neale v2	2018-08-01	114614	0		6_43790159_C_A	rs998584	9.97228e-09	-0.0951295	-0.12766	-0.0625988				0.00693701	TRUE
GCST004611	MYMX	Female	High light scatter reticulocyte count	PMID:27863252	Astle WJ	2016-11-17	170761			6_43796814_C_T	rs1358980	5.19e-13	0.0260683	0.0189919	0.0331448				0.00691268	TRUE
GCST004612	MYMX	Female	High light scatter reticulocyte percentage of red cells	PMID:27863252	Astle WJ	2016-11-17	170763			6_43789345_T_A	rs4711750	5.416e-11	0.0234279	0.0164271	0.0304288				0.00691268	TRUE
GCST004620	MYMX	Female	Sum basophil neutrophil counts	PMID:27863252	Astle WJ	2016-11-17	170143			6_43789345_T_A	rs4711750	1.418e-08	0.0202698	0.0132645	0.027275				0.00691268	TRUE
GCST004629	MYMX	Female	Neutrophil count	PMID:27863252	Astle WJ	2016-11-17	170702			6_43789345_T_A	rs4711750	1.306e-08	0.0202858	0.0132923	0.0272794				0.00691268	TRUE
GCST005195	MYMX	Female	Coronary artery disease	PMID:29212778	van der Harst P	2017-12-06	547261		122733	6_43791136_G_A	rs6905288	4.2e-09				1.04214	1.02789	1.05659	0.00691268	TRUE
GCST008074	MYMX	Female	Triglyceride levels x alcohol consumption (regular vs non-regular drinkers) interaction (2df)	PMID:30698716	de Vries PS	2019-01-29	71394	157438		6_43792590_C_G	rs11967262	3e-32							0.00691268	FALSE
GCST008083	MYMX	Female	Triglyceride levels x alcohol consumption (drinkers vs non-drinkers) interaction (2df)	PMID:30698716	de Vries PS	2019-01-29	127326	267258		6_43792590_C_G	rs11967262	6e-34							0.00691268	FALSE
GCST010658	MYMX	Female	High density lipoprotein cholesterol levels	PMID:31928498	Lind L	2020-01-13	291107			6_43792052_G_A	rs6458349	2e-15	-0.00804642	-0.0100324	-0.00606049				0.00691268	FALSE
GCST010660	MYMX	Female	Triglyceride levels	PMID:31928498	Lind L	2020-01-13	291107			6_43792052_G_A	rs6458349	9e-26	0.0246054	0.0200107	0.0292001				0.00691268	FALSE
GCST90002351	MYMX	Female	Neutrophil count	PMID:32888493	Chen MH	2020-09-01	519288			6_43796814_C_T	rs1358980	2.6e-14	0.015071	0.0111961	0.0189459				0.00691268	TRUE
GCST90002355	MYMX	Female	Neutrophil count	PMID:32888493	Chen MH	2020-09-01	627215			6_43791452_G_A	rs6905891	2e-13							0.00691268	FALSE
GCST90002374	MYMX	Female	White blood cell count	PMID:32888493	Chen MH	2020-09-01	562243			6_43790159_C_A	rs998584	9.24e-17	0.015791	0.0120709	0.0195111				0.00691268	TRUE
GCST90018954	MYMX	Female	Gamma glutamyl transpeptidase	PMID:34594039	Sakaue S	2021-09-30	477575			6_43792052_G_A	rs6458349	4e-09	0.0132	0.00880314	0.0175969				0.00691268	FALSE
NEALE2_23123_raw	MYMX	Female	Arm fat percentage (left)		UKB Neale v2	2018-08-01	354707	0		6_43796814_C_T	rs1358980	8.222e-12	-0.122799	-0.158013	-0.0875847				0.00691268	TRUE
NEALE2_23127_raw	MYMX	Female	Trunk fat percentage		UKB Neale v2	2018-08-01	354619	0		6_43796814_C_T	rs1358980	2.56694e-09	-0.10265	-0.136423	-0.0688772				0.00691268	TRUE
NEALE2_30020_raw	MYMX	Female	Haemoglobin concentration		UKB Neale v2	2018-08-01	350474	0		6_43791136_G_A	rs6905288	5.0546e-11	0.0154564	0.010845	0.0200678				0.00691268	TRUE
GCST002216	MYMX	Female	Triglycerides	PMID:24097068	Willer CJ	2013-10-06	94595	93982		6_43790159_C_A	rs998584	3e-15	0.0293	0.022048	0.036552				0.00687702	TRUE
GCST002782	MYMX	Female	Waist-to-hip ratio adjusted for body mass index	PMID:25673412	Shungin D	2015-02-12	142762	80837		6_43790159_C_A	rs998584	1e-28	0.0418	0.0344325	0.0491675				0.00687702	FALSE
GCST002782_3	MYMX	Female	Waist-to-hip ratio adjusted for body mass index [EA, women]	PMID:25673412	Shungin D	2015-02-12	142762	80837		6_43790159_C_A	rs998584	7e-34	0.0631	0.0529072	0.0732928				0.00687702	FALSE
GCST002782_4	MYMX	Female	Waist-to-hip ratio adjusted for body mass index [EA]	PMID:25673412	Shungin D	2015-02-12	142762	80837		6_43790159_C_A	rs998584	1e-29	0.0432	0.0357227	0.0506773				0.00687702	FALSE
GCST002782_6	MYMX	Female	Waist-to-hip ratio adjusted for body mass index [women]	PMID:25673412	Shungin D	2015-02-12	142762	80837		6_43790159_C_A	rs998584	8e-33	0.061	0.0509804	0.0710196				0.00687702	FALSE
GCST004063_3	MYMX	Female	Waist circumference adjusted for body mass index [EA,women]	PMID:25673412	Shungin D	2015-02-12	142762	80837		6_43790159_C_A	rs998584	4e-30	0.0564	0.0467064	0.0660936				0.00687702	FALSE
GCST004063_4	MYMX	Female	Waist circumference adjusted for body mass index [EA]	PMID:25673412	Shungin D	2015-02-12	142762	80837		6_43790159_C_A	rs998584	6e-15	0.0293	0.0219412	0.0366588				0.00687702	FALSE
GCST004500_4	MYMX	Female	Waist circumference adjusted for BMI (adjusted for smoking behaviour) [women]	PMID:28443625	Justice AE	2017-04-26	195506	167694		6_43790159_C_A	rs998584	5e-25	0.0529	0.0428657	0.0629343				0.00687702	FALSE
GCST004501	MYMX	Female	Waist circumference adjusted for BMI (joint analysis main effects and smoking interaction)	PMID:28443625	Justice AE	2017-04-26	195506	167694		6_43790159_C_A	rs998584	1e-13							0.00687702	FALSE
GCST004501_5	MYMX	Female	Waist circumference adjusted for BMI (joint analysis main effects and smoking interaction) [women]	PMID:28443625	Justice AE	2017-04-26	195506	167694		6_43790159_C_A	rs998584	2e-24							0.00687702	FALSE
GCST004504	MYMX	Female	Waist circumference adjusted for BMI in non-smokers	PMID:28443625	Justice AE	2017-04-26	152914	141861		6_43790159_C_A	rs998584	4e-11	0.0286	0.0201119	0.0370881				0.00687702	FALSE
GCST004504_3	MYMX	Female	Waist circumference adjusted for BMI in non-smokers [women]	PMID:28443625	Justice AE	2017-04-26	152914	141861		6_43790159_C_A	rs998584	4e-22	0.0547	0.0436142	0.0657858				0.00687702	FALSE
GCST004562	MYMX	Female	Waist circumference adjusted for body mass index	PMID:28448500	Graff M	2017-04-27	159510	44060		6_43790159_C_A	rs998584	3e-14	0.0295	0.0218904	0.0371096				0.00687702	FALSE
GCST004562_3	MYMX	Female	Waist circumference adjusted for body mass index [EA, women]	PMID:28448500	Graff M	2017-04-27	159510	44060		6_43790159_C_A	rs998584	8e-24	0.0542	0.043644	0.064756				0.00687702	FALSE
GCST004563	MYMX	Female	Waist circumference adjusted for BMI (joint analysis main effects and physical activity interaction)	PMID:28448500	Graff M	2017-04-27	159510	44060		6_43790159_C_A	rs998584	1e-14							0.00687702	FALSE
GCST004563_3	MYMX	Female	Waist circumference adjusted for BMI (joint analysis main effects and physical activity interaction) [EA, women]	PMID:28448500	Graff M	2017-04-27	159510	44060		6_43790159_C_A	rs998584	3e-25							0.00687702	FALSE
GCST004564_3	MYMX	Female	Waist circumference adjusted for BMI in active individuals [EA,women]	PMID:28448500	Graff M	2017-04-27	122328	31959		6_43790159_C_A	rs998584	4e-19	0.054	0.0421571	0.0658429				0.00687702	FALSE
GCST004567	MYMX	Female	Waist-to-hip ratio adjusted for BMI (joint analysis for main effect and physical activity interaction)	PMID:28448500	Graff M	2017-04-27	155688	44060		6_43790159_C_A	rs998584	1e-18							0.00687702	FALSE
GCST004567_3	MYMX	Female	Waist-to-hip ratio adjusted for BMI (joint analysis for main effect and physical activity interaction) [EA, women]	PMID:28448500	Graff M	2017-04-27	155688	44060		6_43790159_C_A	rs998584	5e-21							0.00687702	FALSE
GCST004567_6	MYMX	Female	Waist-to-hip ratio adjusted for BMI (joint analysis for main effect and physical activity interaction) [women]	PMID:28448500	Graff M	2017-04-27	155688	44060		6_43790159_C_A	rs998584	5e-21							0.00687702	FALSE
GCST004576	MYMX	Female	Waist-to-hip ratio adjusted for body mass index	PMID:28448500	Graff M	2017-04-27	155688	44060		6_43790159_C_A	rs998584	1e-19	0.0369	0.0289426	0.0448574				0.00687702	FALSE
GCST004576_6	MYMX	Female	Waist-to-hip ratio adjusted for body mass index [women]	PMID:28448500	Graff M	2017-04-27	155688	44060		6_43790159_C_A	rs998584	3e-21	0.0503	0.0398814	0.0607186				0.00687702	FALSE
GCST004578	MYMX	Female	Waist-to-hip ratio adjusted for BMI in active individuals	PMID:28448500	Graff M	2017-04-27	119301	31959		6_43790159_C_A	rs998584	6e-17	0.0411	0.0314701	0.0507299				0.00687702	FALSE
GCST004578_3	MYMX	Female	Waist-to-hip ratio adjusted for BMI in active individuals [EA, women]	PMID:28448500	Graff M	2017-04-27	119301	31959		6_43790159_C_A	rs998584	4e-18	0.0556	0.0430434	0.0681566				0.00687702	FALSE
GCST004578_6	MYMX	Female	Waist-to-hip ratio adjusted for BMI in active individuals [women]	PMID:28448500	Graff M	2017-04-27	119301	31959		6_43790159_C_A	rs998584	4e-18	0.0556	0.0430434	0.0681566				0.00687702	FALSE
GCST005194	MYMX	Female	Coronary artery disease	PMID:29212778	van der Harst P	2017-12-06	296525	250736	34541	6_43791136_G_A	rs6905288	3.995e-12				1.03935	1.02801	1.05083	0.00687702	TRUE
GCST005956	MYMX	Female	Waist-to-hip ratio adjusted for BMI	PMID:26426971	Winkler TW	2015-10-01	252375			6_43790159_C_A	rs998584	7e-26	0.0574	0.0467055	0.0680945				0.00687702	FALSE
GCST005958_2	MYMX	Female	Waist-to-hip ratio adjusted for BMI (age >50) [women]	PMID:26426971	Winkler TW	2015-10-01	158073			6_43790159_C_A	rs998584	2e-19	0.0574	0.044918	0.069882				0.00687702	FALSE
GCST005962	MYMX	Female	Waist-to-hip ratio adjusted for BMI x sex x age interaction (4df test)	PMID:26426971	Winkler TW	2015-10-01	252375			6_43790159_C_A	rs998584	3e-31							0.00687702	FALSE
GCST006003	MYMX	Female	Triglyceride levels	PMID:29403010	Kanai M	2018-02-05	105597			6_43789126_A_C	rs2146324	1e-10							0.00687702	FALSE
GCST006611	MYMX	Female	HDL cholesterol	PMID:30275531	Klarin D	2018-10-01	297626	319677		6_43790159_C_A	rs998584	5e-40	-0.0368	-0.0422468	-0.0313532				0.00687702	FALSE
GCST006613	MYMX	Female	Triglycerides	PMID:30275531	Klarin D	2018-10-01	297626	319677		6_43790159_C_A	rs998584	2e-54	0.0431	0.0376623	0.0485377				0.00687702	FALSE
GCST006979	MYMX	Female	Heel bone mineral density	PMID:30598549	Morris JA	2018-12-31	426824			6_43789345_T_A	rs4711750	1.3e-10	0.0129624	0.00937797	0.0165468				0.00687702	TRUE
GCST007067	MYMX	Female	Waist-hip ratio	PMID:30595370	Kichaev G	2018-12-27	458000			6_43790159_C_A	rs998584	3e-145							0.00687702	FALSE
GCST008052	MYMX	Female	Waist-hip ratio	PMID:31217584	Wojcik GL	2019-06-19	33904			6_43790159_C_A	rs998584	3e-10							0.00687702	FALSE
GCST008685	MYMX	Female	HDL cholesterol levels	PMID:30926973	Bentley AR	2019-03-29	133824			6_43790159_C_A	rs998584	3e-08	-0.0069	-0.00934052	-0.00445948				0.00687702	FALSE
GCST008702	MYMX	Female	Triglyceride levels	PMID:30926973	Bentley AR	2019-03-29	111909			6_43790159_C_A	rs998584	3e-09	0.0153	0.0102444	0.0203556				0.00687702	FALSE
GCST008733	MYMX	Female	Waist-to-hip ratio adjusted for BMI	PMID:30575882	Lotta LA	2018-12-01	660648			6_43790159_C_A	rs998584	3e-168	0.05	0.0464554	0.0535446				0.00687702	FALSE
GCST009602	MYMX	Female	Metabolic syndrome	PMID:31589552	Lind L	2019-10-07	291107			6_43790159_C_A	rs998584	4e-27	0.0706852	0.0578407	0.0835297				0.00687702	FALSE
GCST010173	MYMX	Female	Triglyceride levels	PMID:32154731	Ripatti P	2020-03-10	324694			6_43790159_C_A	rs998584	7e-56							0.00687702	FALSE
GCST010242	MYMX	Female	HDL cholesterol levels	PMID:32203549	Richardson TG	2020-03-23	403943			6_43790159_C_A	rs998584	3e-71	-0.0340915	-0.0378353	-0.0303477				0.00687702	FALSE
GCST010244	MYMX	Female	Triglyceride levels	PMID:32203549	Richardson TG	2020-03-23	441016			6_43790159_C_A	rs998584	5e-89	0.0398822	0.0359747	0.0437897				0.00687702	FALSE
GCST010555_2	MYMX	Female	Type 2 diabetes [conditional]	PMID:32541925	Vujkovic M	2020-06-15	1114458		148726	6_43789345_T_A	rs4711750	1e-15							0.00687702	FALSE
GCST010866	MYMX	Female	Coronary artery disease	PMID:33020668	Koyama S	2020-10-05	649058		121234	6_43790159_C_A	rs998584	2e-14							0.00687702	FALSE
GCST011334	MYMX	Female	Body mass index and triglycerides (pairwise)	PMID:33619380	Huang LO	2021-02-22	517085			6_43790159_C_A	rs998584	3e-16							0.00687702	FALSE
GCST011336	MYMX	Female	Body mass index and HDL-C (pairwise)	PMID:33619380	Huang LO	2021-02-22	526391			6_43790159_C_A	rs998584	6e-15							0.00687702	FALSE
GCST011342	MYMX	Female	Body fat percentage and triglycerides (pairwise)	PMID:33619380	Huang LO	2021-02-22	278577			6_43790159_C_A	rs998584	3e-16							0.00687702	FALSE
GCST011345	MYMX	Female	Triglyceride levels	PMID:33339817	Nielsen JB	2020-12-18	203476			6_43789345_T_A	rs4711750	8e-18							0.00687702	FALSE
GCST011348	MYMX	Female	High density lipoprotein cholesterol levels	PMID:33339817	Nielsen JB	2020-12-18	203476			6_43790159_C_A	rs998584	2e-15							0.00687702	FALSE
GCST012228	MYMX	Female	Waist-hip index	PMID:34021172	Christakoudi S	2021-05-21	186825			6_43790159_C_A	rs998584	8e-19	0.0277301	0.0215957	0.0338645				0.00687702	FALSE
GCST012229	MYMX	Female	Hip index	PMID:34021172	Christakoudi S	2021-05-21	186825			6_43790159_C_A	rs998584	3e-21	-0.0303647	-0.0366541	-0.0240753				0.00687702	FALSE
GCST012230	MYMX	Female	Waist-to-hip ratio adjusted for BMI	PMID:34021172	Christakoudi S	2021-05-21	186825			6_43790159_C_A	rs998584	2e-18	0.0274613	0.0213151	0.0336075				0.00687702	FALSE
GCST90002386	MYMX	Female	High light scatter reticulocyte percentage of red cells	PMID:32888494	Vuckovic D	2020-09-01	408112			6_43789345_T_A	rs4711750	2.3e-22	0.0207175	0.0165427	0.0248923				0.00687702	TRUE
GCST90002406	MYMX	Female	Reticulocyte fraction of red cells	PMID:32888494	Vuckovic D	2020-09-01	408112			6_43789345_T_A	rs4711750	1.2e-21	0.0205073	0.0163037	0.0247109				0.00687702	TRUE
GCST90011898	MYMX	Female	Alanine aminotransferase levels	PMID:33547301	Chen VL	2021-02-05	390812	134154		6_43789345_T_A	rs4711750	4e-14							0.00687702	FALSE
GCST90011899	MYMX	Female	Aspartate aminotransferase levels	PMID:33547301	Chen VL	2021-02-05	389565	134182		6_43790159_C_A	rs998584	1e-16	8.29	6.33349	10.2465				0.00687702	FALSE
GCST90012110	MYMX	Female	Sex hormone-binding globulin levels adjusted for BMI	PMID:32042192	Ruth KS	2020-02-10	368929			6_43790159_C_A	rs998584	2.1e-31	-0.00942815	-0.0110753	-0.00778104				0.00687702	TRUE
GCST90013405	MYMX	Female	Liver enzyme levels (alanine transaminase)	PMID:33972514	Pazoki R	2021-05-10	437267	315572		6_43789345_T_A	rs4711750	3.1e-16	0.00322879	0.0024673	0.00399028				0.00687702	TRUE
GCST90013663	MYMX	Female	Alanine aminotransferase levels	PMID:34315874	Ward LD	2021-07-27	408300			6_43789345_T_A	rs4711750	3e-28							0.00687702	FALSE
GCST90013664	MYMX	Female	Aspartate aminotransferase levels	PMID:34315874	Ward LD	2021-07-27	406934			6_43789345_T_A	rs4711750	1e-23							0.00687702	FALSE
GCST90018755	MYMX	Female	Triglycerides	PMID:34594039	Sakaue S	2021-09-30	111667			6_43789126_A_C	rs2146324	5e-11	0.0429186	0.0301167	0.0557205				0.00687702	FALSE
GCST90018926	MYMX	Female	Type 2 diabetes	PMID:34594039	Sakaue S	2021-09-30	667504		84224	6_43789345_T_A	rs4711750	1e-12							0.00687702	FALSE
GCST90018944	MYMX	Female	Aspartate aminotransferase levels	PMID:34594039	Sakaue S	2021-09-30	493058			6_43790159_C_A	rs998584	1e-16	0.0159	0.0121475	0.0196525				0.00687702	FALSE
GCST90018956	MYMX	Female	HDL cholesterol	PMID:34594039	Sakaue S	2021-09-30	390103			6_43790159_C_A	rs998584	7e-56	-0.0324	-0.0364323	-0.0283677				0.00687702	FALSE
GCST90018958	MYMX	Female	Hemoglobin A1c levels	PMID:34594039	Sakaue S	2021-09-30	415403			6_43790159_C_A	rs998584	4e-22	0.0196	0.0156278	0.0235722				0.00687702	FALSE
GCST90018975	MYMX	Female	Triglycerides	PMID:34594039	Sakaue S	2021-09-30	455659			6_43790159_C_A	rs998584	4e-72	0.0362	0.0322495	0.0401505				0.00687702	FALSE
GCST90018989	MYMX	Female	Medication use (HMG CoA reductase inhibitors)	PMID:34594039	Sakaue S	2021-09-30	469111		106770	6_43789126_A_C	rs2146324	2e-12	0.0415	0.029937	0.053063				0.00687702	FALSE
GCST90020024	MYMX	Female	A body shape index	PMID:34021172	Christakoudi S	2021-05-21	219872			6_43790159_C_A	rs998584	6e-129	0.0689325	0.0633401	0.0745249				0.00687702	FALSE
GCST90020025	MYMX	Female	Waist-to-hip ratio adjusted for BMI	PMID:34021172	Christakoudi S	2021-05-21	219872			6_43790159_C_A	rs998584	2e-134	0.0695825	0.0640553	0.0751097				0.00687702	FALSE
GCST90020027	MYMX	Female	Waist-hip index	PMID:34021172	Christakoudi S	2021-05-21	219872			6_43790159_C_A	rs998584	7e-138	0.0704798	0.064953	0.0760066				0.00687702	FALSE
GCST90020029	MYMX	Female	Waist circumference adjusted for body mass index	PMID:34021172	Christakoudi S	2021-05-21	219872			6_43790159_C_A	rs998584	2e-117	0.0655991	0.0600178	0.0711804				0.00687702	FALSE
GCST90020233	MYMX	Female	High density lipoprotein cholesterol levels	PMID:33980691	Martin S	2021-05-12	392965			6_43790159_C_A	rs998584	2e-83	-0.035	-0.038545	-0.031455				0.00687702	FALSE
GCST90020234	MYMX	Female	Sex hormone-binding globulin levels	PMID:33980691	Martin S	2021-05-12	389354			6_43790159_C_A	rs998584	8e-19	-0.016	-0.0195395	-0.0124605				0.00687702	FALSE
GCST90020235	MYMX	Female	Triglycerides	PMID:33980691	Martin S	2021-05-12	429011			6_43790159_C_A	rs998584	4e-96	0.04	0.0362315	0.0437685				0.00687702	FALSE
GCST90020236	MYMX	Female	Alanine aminotransferase levels	PMID:33980691	Martin S	2021-05-12	429203			6_43790159_C_A	rs998584	3e-18	0.017	0.0131752	0.0208248				0.00687702	FALSE
GCST90020237	MYMX	Female	Aspartate aminotransferase levels	PMID:33980691	Martin S	2021-05-12	424778			6_43790159_C_A	rs998584	4e-18	0.018	0.0139349	0.0220651				0.00687702	FALSE
GCST90025952	MYMX	Female	Apolipoprotein B levels	PMID:34226706	Barton AR	2021-07-05	435744			6_43789345_T_A	rs4711750	1.6e-20	0.0175116	0.0135398	0.0214834				0.00687702	TRUE
GCST90025955	MYMX	Female	Apolipoprotein A1 levels	PMID:34226706	Barton AR	2021-07-05	398508			6_43789345_T_A	rs4711750	2.3e-55	-0.0311346	-0.0351553	-0.0271139				0.00687702	TRUE
GCST90025956	MYMX	Female	HDL cholesterol levels	PMID:34226706	Barton AR	2021-07-05	400754			6_43789345_T_A	rs4711750	9.6e-132	-0.0459338	-0.0498101	-0.0420575				0.00687702	TRUE
GCST90025957	MYMX	Female	Triglyceride levels	PMID:34226706	Barton AR	2021-07-05	437532			6_43789345_T_A	rs4711750	7e-134	0.0470063	0.0431376	0.050875				0.00687702	TRUE
GCST90025958	MYMX	Female	Sex hormone-binding globulin levels	PMID:34226706	Barton AR	2021-07-05	397043			6_43789345_T_A	rs4711750	4.5e-30	-0.0220559	-0.0259988	-0.018113				0.00687702	TRUE
GCST90025966	MYMX	Female	Gamma glutamyl transferase levels	PMID:34226706	Barton AR	2021-07-05	437651			6_43789345_T_A	rs4711750	6.8e-17	0.0154868	0.0116331	0.0193405				0.00687702	TRUE
GCST90025974	MYMX	Female	Hemoglobin A1c levels	PMID:34226706	Barton AR	2021-07-05	437749			6_43789345_T_A	rs4711750	3.6e-44	0.0270903	0.023271	0.0309096				0.00687702	TRUE
GCST90025976	MYMX	Female	Mean sphered cell volume	PMID:34226706	Barton AR	2021-07-05	437736			6_43791136_G_A	rs6905288	8.7e-28	-0.0196709	-0.0233622	-0.0159796				0.00687702	TRUE
GCST90025977	MYMX	Female	Neutrophil count	PMID:34226706	Barton AR	2021-07-05	443782			6_43789345_T_A	rs4711750	3.6e-11	0.0120323	0.00810775	0.0159568				0.00687702	TRUE
GCST90025979	MYMX	Female	Alanine aminotransferase levels	PMID:34226706	Barton AR	2021-07-05	437724			6_43789345_T_A	rs4711750	3e-30	0.0234444	0.0194151	0.0274737				0.00687702	TRUE
GCST90025980	MYMX	Female	Aspartate aminotransferase levels	PMID:34226706	Barton AR	2021-07-05	436275			6_43789345_T_A	rs4711750	4.6e-21	0.0195668	0.015553	0.0235806				0.00687702	TRUE
GCST90025982	MYMX	Female	Heel bone mineral density T score	PMID:34226706	Barton AR	2021-07-05	445855			6_43789345_T_A	rs4711750	2e-15	0.0137467	0.010123	0.0173704				0.00687702	TRUE
GCST90025985	MYMX	Female	White blood cell count	PMID:34226706	Barton AR	2021-07-05	444734			6_43789345_T_A	rs4711750	5.5e-11	0.0116969	0.00783131	0.0155625				0.00687702	TRUE
GCST90025989	MYMX	Female	Insulin-like growth factor 1 levels	PMID:34226706	Barton AR	2021-07-05	435516			6_43789345_T_A	rs4711750	6.9e-17	0.0164835	0.0126369	0.0203301				0.00687702	TRUE
GCST90025994	MYMX	Female	Body mass index	PMID:34226706	Barton AR	2021-07-05	457756			6_43789345_T_A	rs4711750	6.8e-10	-0.0118886	-0.0156465	-0.00813065				0.00687702	TRUE
GCST90025996	MYMX	Female	Waist-to-hip ratio adjusted for BMI	PMID:34226706	Barton AR	2021-07-05	458349			6_43789345_T_A	rs4711750	8.4e-142	0.0494331	0.0455404	0.0533258				0.00687702	TRUE
GCST90038594	MYMX	Female	Metabolic biomarkers (multivariate analysis)	PMID:33980691	Martin S	2021-05-12	389354			6_43790159_C_A	rs998584	2e-122							0.00687702	FALSE
GCST90094908	MYMX	Female	Nonalcoholic fatty liver disease (imputed)	PMID:35047847	Miao Z	2021-08-24	137048		28396	6_43789345_T_A	rs4711750	1e-21							0.00687702	FALSE
FINNGEN_R6_RX_STATIN	MYMX	Female	Statin medication		FINNGEN_R6	2022-01-24	260405	0	86466	6_43790159_C_A	rs998584	1.2e-14				1.06594	1.04878	1.08338	0.00685273	TRUE
GCST000829	MYMX	Female	Waist-hip ratio	PMID:20935629	Heid IM	2010-10-10	77167	113636		6_43791136_G_A	rs6905288	6e-25	0.04	0.0323997	0.0476003				0.00685273	FALSE
GCST001465	MYMX	Female	Adiponectin levels	PMID:22479202	Dastani Z	2012-03-29	29347	10536		6_43790159_C_A	rs998584	3e-08	-0.03	-0.040611	-0.019389				0.00685273	FALSE
GCST002223	MYMX	Female	HDL cholesterol	PMID:24097068	Willer CJ	2013-10-06	94595	93982		6_43790159_C_A	rs998584	2.269e-11	-0.026	-0.033448	-0.018552				0.00685273	TRUE
GCST004232_3	MYMX	Female	HDL cholesterol levels [Trans-ethnic initial]	PMID:28334899	Spracklen CN	2017-02-21	222097	8741		6_43791136_G_A	rs6905288	2e-12	-0.0238	-0.0304313	-0.0171687				0.00685273	FALSE
GCST004234	MYMX	Female	HDL cholesterol levels [BMI adjusted]	PMID:28334899	Spracklen CN	2017-02-21	25169	45953		6_43791136_G_A	rs6905288	1e-11	-0.0446	-0.057443	-0.031757				0.00685273	FALSE
GCST004237_2	MYMX	Female	Triglyceride levels [Trans-ethnic initial]	PMID:28334899	Spracklen CN	2017-02-21	206044	10857		6_43791136_G_A	rs6905288	6e-16	0.0274	0.0207611	0.0340389				0.00685273	FALSE
GCST004564	MYMX	Female	Waist circumference adjusted for BMI in active individuals	PMID:28448500	Graff M	2017-04-27	122328	31959		6_43790159_C_A	rs998584	2e-10	0.0286	0.019788	0.037412				0.00685273	FALSE
GCST004610	MYMX	Female	White blood cell count	PMID:27863252	Astle WJ	2016-11-17	172435			6_43790159_C_A	rs998584	6.616e-09	0.0208048	0.0137747	0.0278349				0.00685273	TRUE
GCST004613	MYMX	Female	Sum neutrophil eosinophil counts	PMID:27863252	Astle WJ	2016-11-17	170384			6_43789345_T_A	rs4711750	1.271e-08	0.0203197	0.0133202	0.0273193				0.00685273	TRUE
GCST004622	MYMX	Female	Reticulocyte count	PMID:27863252	Astle WJ	2016-11-17	170641			6_43790159_C_A	rs998584	2.52e-13	0.0263027	0.0192576	0.0333478				0.00685273	TRUE
GCST005196	MYMX	Female	Coronary artery disease	PMID:29212778	van der Harst P	2017-12-06	250736	296525	88192	6_43791136_G_A	rs6905288	2e-12	0.045	0.0324618	0.0575382				0.00685273	FALSE
GCST005957_2	MYMX	Female	Waist-to-hip ratio adjusted for BMI (age <50) [women]	PMID:26426971	Winkler TW	2015-10-01	94302			6_43790159_C_A	rs998584	2e-14	0.064	0.047604	0.080396				0.00685273	FALSE
GCST005959	MYMX	Female	Waist-to-hip ratio adjusted for BMI x sex interaction	PMID:26426971	Winkler TW	2015-10-01	252375			6_43790159_C_A	rs998584	5e-10							0.00685273	FALSE
GCST006433	MYMX	Female	Heel bone mineral density	PMID:30048462	Kim SK	2018-07-26	394929			6_43790159_C_A	rs998584	8e-15							0.00685273	FALSE
GCST007039	MYMX	Female	Body mass index	PMID:30595370	Kichaev G	2018-12-27	458000			6_43790159_C_A	rs998584	5e-10							0.00685273	FALSE
GCST007066	MYMX	Female	Heel bone mineral density	PMID:30595370	Kichaev G	2018-12-27	446000			6_43790159_C_A	rs998584	4e-14							0.00685273	FALSE
GCST007072	MYMX	Female	Cardiovascular disease	PMID:30595370	Kichaev G	2018-12-27	459000			6_43791136_G_A	rs6905288	1e-12							0.00685273	FALSE
GCST007087	MYMX	Female	Systolic blood pressure	PMID:30595370	Kichaev G	2018-12-27	422000			6_43791136_G_A	rs6905288	9e-10							0.00685273	FALSE
GCST007286	MYMX	Female	Triglycerides x physical activity interaction (2df test)	PMID:30670697	Kilpelainen TO	2019-01-22	102281	101841		6_43792590_C_G	rs11967262	4e-25							0.00685273	FALSE
GCST007518	MYMX	Female	Type 2 diabetes (adjusted for BMI)	PMID:29632382	Mahajan A	2018-04-09	298957		48286	6_43791136_G_A	rs6905288	5.773e-11				1.04091	1.02774	1.05426	0.00685273	TRUE
GCST007929	MYMX	Female	Medication use (calcium channel blockers)	PMID:31015401	Wu Y	2019-04-23	204378		31904	6_43790159_C_A	rs998584	5e-10	0.0499879	0.0342338	0.065742				0.00685273	FALSE
GCST007931	MYMX	Female	Medication use (HMG CoA reductase inhibitors)	PMID:31015401	Wu Y	2019-04-23	290385		73475	6_43790159_C_A	rs998584	6e-12	0.0386323	0.027626	0.0496386				0.00685273	FALSE
GCST008074_3	MYMX	Female	Triglyceride levels x alcohol consumption (regular vs non-regular drinkers) interaction (2df) [Asian]	PMID:30698716	de Vries PS	2019-01-29	71394	157438		6_43792590_C_G	rs11967262	1e-08							0.00685273	FALSE
GCST008074_4	MYMX	Female	Triglyceride levels x alcohol consumption (regular vs non-regular drinkers) interaction (2df) [EA]	PMID:30698716	de Vries PS	2019-01-29	71394	157438		6_43792590_C_G	rs11967262	6e-21							0.00685273	FALSE
GCST008075	MYMX	Female	HDL cholesterol levels x alcohol consumption (regular vs non-regular drinkers) interaction (2df)	PMID:30698716	de Vries PS	2019-01-29	71394	157438		6_43792590_C_G	rs11967262	2e-22							0.00685273	FALSE
GCST008075_4	MYMX	Female	HDL cholesterol levels x alcohol consumption (regular vs non-regular drinkers) interaction (2df) [EA]	PMID:30698716	de Vries PS	2019-01-29	71394	157438		6_43792590_C_G	rs11967262	1e-13							0.00685273	FALSE
GCST008076	MYMX	Female	Triglyceride levels	PMID:30698716	de Vries PS	2019-01-29	127326	267258		6_43792590_C_G	rs11967262	2e-10							0.00685273	FALSE
GCST008083_3	MYMX	Female	Triglyceride levels x alcohol consumption (drinkers vs non-drinkers) interaction (2df) [Asian]	PMID:30698716	de Vries PS	2019-01-29	127326	267258		6_43792590_C_G	rs11967262	1e-08							0.00685273	FALSE
GCST008083_4	MYMX	Female	Triglyceride levels x alcohol consumption (drinkers vs non-drinkers) interaction (2df) [EA]	PMID:30698716	de Vries PS	2019-01-29	127326	267258		6_43792590_C_G	rs11967262	4e-22							0.00685273	FALSE
GCST008084	MYMX	Female	HDL cholesterol levels x alcohol consumption (drinkers vs non-drinkers) interaction (2df)	PMID:30698716	de Vries PS	2019-01-29	127326	267258		6_43792590_C_G	rs11967262	7e-26							0.00685273	FALSE
GCST008084_4	MYMX	Female	HDL cholesterol levels x alcohol consumption (drinkers vs non-drinkers) interaction (2df) [EA]	PMID:30698716	de Vries PS	2019-01-29	127326	267258		6_43792590_C_G	rs11967262	2e-16							0.00685273	FALSE
GCST008085	MYMX	Female	HDL cholesterol levels in current drinkers	PMID:30698716	de Vries PS	2019-01-29	71394	159422		6_43792590_C_G	rs11967262	6e-11							0.00685273	FALSE
GCST008087	MYMX	Female	Triglyceride levels in current drinkers	PMID:30698716	de Vries PS	2019-01-29	71394	159422		6_43792590_C_G	rs11967262	3e-16							0.00685273	FALSE
GCST008087_4	MYMX	Female	Triglyceride levels in current drinkers [EA]	PMID:30698716	de Vries PS	2019-01-29	71394	159422		6_43792590_C_G	rs11967262	9e-10							0.00685273	FALSE
GCST008734	MYMX	Female	Waist-hip ratio	PMID:30575882	Lotta LA	2018-12-01	663598			6_43790159_C_A	rs998584	5e-08							0.00685273	FALSE
GCST008742	MYMX	Female	Predicted visceral adipose tissue	PMID:31501611	Karlsson T	2019-09-09	161168			6_43792590_C_G	rs11967262	1e-11							0.00685273	FALSE
GCST008994	MYMX	Female	Waist-to-hip ratio adjusted for BMI	PMID:30239722	Pulit SL	2018-09-14	379501			6_43791136_G_A	rs6905288	9e-140	0.0444	0.0409423	0.0478577				0.00685273	FALSE
GCST008995	MYMX	Female	Waist-to-hip ratio adjusted for BMI	PMID:30239722	Pulit SL	2018-09-14	315284			6_43791136_G_A	rs6905288	9e-140	0.0444	0.0409423	0.0478577				0.00685273	FALSE
GCST008996	MYMX	Female	Waist-hip ratio	PMID:30239722	Pulit SL	2018-09-14	697734			6_43791136_G_A	rs6905288	2e-78	0.0327	0.0292814	0.0361186				0.00685273	FALSE
GCST008997	MYMX	Female	Waist-hip ratio	PMID:30239722	Pulit SL	2018-09-14	381152			6_43791136_G_A	rs6905288	2e-78	0.0327	0.0292814	0.0361186				0.00685273	FALSE
GCST009004	MYMX	Female	Body mass index	PMID:30239722	Pulit SL	2018-09-14	806834			6_43791136_G_A	rs6905288	2e-09	-0.01	-0.0132679	-0.00673214				0.00685273	FALSE
GCST009364	MYMX	Female	Triglyceride levels x long total sleep time interaction (2df test)	PMID:31719535	Noordam R	2019-11-12	61990	41474		6_43791136_G_A	rs6905288	4e-11							0.00685273	FALSE
GCST009367	MYMX	Female	HDL cholesterol levels x short total sleep time interaction (2df test)	PMID:31719535	Noordam R	2019-11-12	62457	64469		6_43791136_G_A	rs6905288	3e-11							0.00685273	FALSE
GCST009379	MYMX	Female	Type 2 diabetes	PMID:30297969	Mahajan A	2018-10-08	898130		74124	6_43792590_C_G	rs11967262	9e-10							0.00685273	FALSE
GCST009858	MYMX	Female	Waist-to-hip ratio adjusted for BMI	PMID:31669095	Zhu Z	2019-10-24	457690			6_43791136_G_A	rs6905288	1e-123							0.00685273	FALSE
GCST009867	MYMX	Female	Waist circumference adjusted for body mass index	PMID:31669095	Zhu Z	2019-10-24	457690			6_43791136_G_A	rs6905288	1e-75							0.00685273	FALSE
GCST010204	MYMX	Female	Low density lipoprotein cholesterol levels	PMID:32154731	Ripatti P	2020-03-10	324708			6_43790159_C_A	rs998584	2e-10							0.00685273	FALSE
GCST010555	MYMX	Female	Type 2 diabetes	PMID:32541925	Vujkovic M	2020-06-15	1114458		148726	6_43792590_C_G	rs11967262	2e-15							0.00685273	FALSE
GCST011330	MYMX	Female	Body mass index and coronary artery disease (pairwise)	PMID:33619380	Huang LO	2021-02-22	523529			6_43790159_C_A	rs998584	5e-10							0.00685273	FALSE
GCST011344	MYMX	Female	Body fat percentage and HDL-C (pairwise)	PMID:33619380	Huang LO	2021-02-22	287833			6_43790159_C_A	rs998584	3e-13							0.00685273	FALSE
GCST011520	MYMX	Female	Insulin-like growth factor 1 levels	PMID:33587031	Sinnott-Armstrong N	2021-02-15	317114			6_43790159_C_A	rs998584	1e-13	0.00494152	0.00363988	0.00624316				0.00685273	FALSE
GCST012227	MYMX	Female	Hip circumference adjusted for BMI	PMID:34021172	Christakoudi S	2021-05-21	186825			6_43790159_C_A	rs998584	1e-16	-0.0253536	-0.0313373	-0.0193699				0.00685273	FALSE
GCST90000059	MYMX	Female	Diastolic blood pressure	PMID:33230300	Surendran P	2020-11-23	810865	354096		6_43791136_G_A	rs6905288	2.897e-22	0.0153168	0.0122231	0.0184104				0.00685273	TRUE
GCST90000062	MYMX	Female	Systolic blood pressure	PMID:33230300	Surendran P	2020-11-23	810865	354096		6_43791136_G_A	rs6905288	3.542e-12	0.0109616	0.00787218	0.014051				0.00685273	TRUE
GCST90002238	MYMX	Female	Fasting insulin	PMID:34059833	Chen J	2021-05-31	151013			6_43790159_C_A	rs998584	2e-10	0.0123	0.00851023	0.0160898				0.00685273	FALSE
GCST90002304	MYMX	Female	Hematocrit	PMID:32888493	Chen MH	2020-09-01	562259			6_43791136_G_A	rs6905288	1.37e-13	0.014153	0.0104074	0.0178986				0.00685273	TRUE
GCST90002310	MYMX	Female	Hemoglobin concentration	PMID:32888493	Chen MH	2020-09-01	563946			6_43790159_C_A	rs998584	8.29e-22	0.018239	0.014517	0.021961				0.00685273	TRUE
GCST90002369	MYMX	Female	Red cell distribution width	PMID:32888493	Chen MH	2020-09-01	531774			6_43790159_C_A	rs998584	9.92e-09	-0.011114	-0.0149105	-0.00731748				0.00685273	TRUE
GCST90002383	MYMX	Female	Hematocrit	PMID:32888494	Vuckovic D	2020-09-01	408112			6_43791136_G_A	rs6905288	3.8e-14	0.016253	0.0120442	0.0204618				0.00685273	TRUE
GCST90002384	MYMX	Female	Hemoglobin	PMID:32888494	Vuckovic D	2020-09-01	408112			6_43790159_C_A	rs998584	5.7e-21	0.0200236	0.0158464	0.0242008				0.00685273	TRUE
GCST90002385	MYMX	Female	High light scatter reticulocyte count	PMID:32888494	Vuckovic D	2020-09-01	408112			6_43790159_C_A	rs998584	4.5e-29	0.0238781	0.019696	0.0280602				0.00685273	TRUE
GCST90002387	MYMX	Female	Immature fraction of reticulocytes	PMID:32888494	Vuckovic D	2020-09-01	408112			6_43791136_G_A	rs6905288	7.3e-10	0.0136105	0.00927892	0.0179421				0.00685273	TRUE
GCST90002403	MYMX	Female	Red blood cell count	PMID:32888494	Vuckovic D	2020-09-01	408112			6_43791136_G_A	rs6905288	8e-23	0.0206852	0.0165627	0.0248077				0.00685273	TRUE
GCST90002405	MYMX	Female	Reticulocyte count	PMID:32888494	Vuckovic D	2020-09-01	408112			6_43790159_C_A	rs998584	4.4e-30	0.0244493	0.0202441	0.0286545				0.00685273	TRUE
GCST90002412	MYMX	Female	Low density lipoprotein cholesterol levels	PMID:32493714	Klimentidis YC	2020-06-03	431167			6_43791136_G_A	rs6905288	1e-18	0.0170151	0.0132402	0.02079				0.00685273	TRUE
GCST90012106	MYMX	Female	Sex hormone-binding globulin levels adjusted for BMI	PMID:32042192	Ruth KS	2020-02-10	188908			6_43792590_C_G	rs11967262	1.3e-20	-0.0109938	-0.0134216	-0.00856603				0.00685273	TRUE
GCST90018943	MYMX	Female	Alanine aminotransferase levels	PMID:34594039	Sakaue S	2021-09-30	494681			6_43792052_G_A	rs6458349	4e-17	0.019	0.0145735	0.0234265				0.00685273	FALSE
GCST90020026	MYMX	Female	Hip index	PMID:34021172	Christakoudi S	2021-05-21	219872			6_43791136_G_A	rs6905288	5e-12	-0.0203969	-0.0261861	-0.0146077				0.00685273	FALSE
[truncated: 1,961 more rows]
