# Supplementary material for: Gene-Excessive Sleepiness Interactions Suggest Treatment Targets for Obstructive Sleep Apnea Subtype
Source: bioRxiv or medRxiv preprint supplement (doi:10.1101/2024.10.25.24316158), 2024-10-28
Supplement: Supplementary file [file media-1.pdf]

Supplementary Table 1. Data Characteristics

| Cohort                              | Population Group | N            | EDS Presence | Females       | Age           | BMI          | AHI           |
|-------------------------------------|------------------|--------------|--------------|---------------|---------------|--------------|---------------|
|                                     |                  |              | N (%)        | N (%)         | Mean (SD)     | Mean, (SD)   | Mean (SD)     |
| <b>Whole Genome Sequencing Data</b> |                  |              |              |               |               |              |               |
| ARIC                                | EUR              | 1083         | 311 (14.4%)  | 575 (8.77%)   | 62.19 (5.70)  | 28.79 (5.07) | 13.65 (14.20) |
| HCHS/SOL                            | HIS              | 5927         | 902 (41.7%)  | 3426 (52.27%) | 46.73 (13.87) | 30.06 (6.36) | 6.76 (12.72)  |
| CFS                                 | EUR              | 481          | 138 (6.4%)   | 242 (3.69%)   | 43.60 (19.69) | 30.86 (8.87) | 17.96 (24.76) |
|                                     | AFR              | 505          | 184 (8.5%)   | 285 (4.35%)   | 38.96 (19.08) | 32.38 (9.46) | 19.11 (26.80) |
| FHS                                 | EUR              | 464          | 86 (4.0%)    | 231 (3.52%)   | 60.01 (8.50)  | 28.49 (5.13) | 12.36 (13.31) |
| MESA                                | AFR              | 488          | 88 (4.1%)    | 263 (4.01%)   | 68.67 (9.08)  | 30.28 (5.68) | 19.48 (19.70) |
|                                     | EUR              | 694          | 77 (3.6%)    | 370 (5.65%)   | 68.53 (9.08)  | 27.89 (5.09) | 18.39 (17.80) |
|                                     | HIS              | 454          | 57 (2.6%)    | 240 (3.66%)   | 68.29 (9.21)  | 30.08 (5.46) | 21.73 (18.51) |
|                                     | EAS              | 223          | 27 (1.2%)    | 113 (1.72%)   | 67.74 (9.06)  | 24.25 (3.29) | 20.54 (18.70) |
| CHS                                 | EUR              | 540          | 109 (5.0%)   | 318 (4.85%)   | 77.72 (4.24)  | 27.30 (4.43) | 15.36 (15.61) |
|                                     | AFR              | 193          | 59 (2.7%)    | 120 (1.83%)   | 75.69 (4.67)  | 28.64 (4.93) | 15.26 (15.02) |
| JHS                                 | AFR              | 567          | 126 (5.8%)   | 371 (5.66%)   | 63.45 (10.88) | 31.87 (6.89) | 15.69 (15.93) |
| <b>TOTAL</b>                        |                  | <b>11619</b> | <b>2164</b>  | <b>6554</b>   |               |              |               |
| <b>Imputed Genotype Data</b>        |                  |              |              |               |               |              |               |
| ARIC                                | EUR              | 457          | 133 (7.30%)  | 229 (6.28%)   | 62.90 (5.68)  | 28.97 (5.14) | 14.76 (16.84) |
| CFS                                 | AFR              | 72           | 16 (0.88%)   | 39 (1.07%)    | 26.19 (18.18) | 26.79 (9.61) | 7.96 (15.28)  |
|                                     | EUR              | 103          | 19 (1.04%)   | 55 (1.51%)    | 38.11 (17.83) | 29.47 (7.13) | 13.91 (21.06) |
| CHS                                 | EUR              | 216          | 51 (2.80%)   | 140 (3.84%)   | 77.74 (4.41)  | 26.84 (4.40) | 15.08 (14.00) |
|                                     | AFR              | 8            | 4 (0.22%)    | 1 (0.03%)     | 75.50 (5.37)  | 28.10 (2.89) | 23.16 (14.23) |
| FHS                                 | EUR              | 139          | 27 (1.48%)   | 69 (1.89%)    | 56.55 (9.74)  | 28.54 (4.75) | 13.90 (16.19) |
| WASHS                               | EUR              | 1493         | 648 (35.5%)  | 607 (16.66%)  | 52.30 (13.77) | 31.86 (7.89) | 14.43 (18.68) |
| MrOS                                | EUR              | 2209         | 279 (15.3%)  | 0 (0.00%)     | 76.68 (5.67)  | 27.22 (3.74) | 17.31 (15.49) |
| HCHS/SOL                            | HIS              | 4207         | 646 (35.4%)  | 2504 (68.72%) | 45.32 (13.69) | 29.33 (5.35) | 5.91 (11.37)  |
| <b>TOTAL</b>                        |                  | <b>8904</b>  | <b>1823</b>  | <b>3644</b>   |               |              |               |

**Supplementary Table 2. Extended Gene Loci Identified by FUMA SNP2GENE – Interaction Effect, WGS Discovery Analysis**

| <i>Gene</i>    | <i>eQTL</i> | <i>eQTL Association Tissues</i>                                                                                                                                                                                                                                                                                     | <i>Position</i> | <i>Chromatin Interaction</i> | <i>Chromatin Interaction Tissues</i>                                                                                                                                 | <i>Lead Variant</i> |
|----------------|-------------|---------------------------------------------------------------------------------------------------------------------------------------------------------------------------------------------------------------------------------------------------------------------------------------------------------------------|-----------------|------------------------------|----------------------------------------------------------------------------------------------------------------------------------------------------------------------|---------------------|
| <b>NAF1</b>    | 0           |                                                                                                                                                                                                                                                                                                                     | 0               | Yes                          | Mesenchymal_Stem_Cell                                                                                                                                                | rs13118183          |
| <b>NPY1R</b>   | 0           |                                                                                                                                                                                                                                                                                                                     | 0               | Yes                          | Mesenchymal_Stem_Cell                                                                                                                                                | rs13118183          |
| <b>NPY5R</b>   | 1           | CMC_SVA_cis                                                                                                                                                                                                                                                                                                         | 0               | Yes                          | Mesenchymal_Stem_Cell                                                                                                                                                | rs13118183          |
| <b>TKTL2</b>   | 0           |                                                                                                                                                                                                                                                                                                                     | 0               | Yes                          | Mesendoderm:hESC                                                                                                                                                     | rs13118183          |
| <b>MARCHF1</b> | 21          | CMC_NoSVA_cis,<br>GTEx/v8/Adipose_Visceral_<br>Omentum                                                                                                                                                                                                                                                              | 218             | Yes                          | Dorsolateral_Prefrontal_Cortex,<br>Left_Ventricle, Liver, IMR90,<br>Mesenchymal_Stem_Cell,<br>Mesendoderm,<br>Neural_Progenitor_Cell, Trophoblast-<br>like_Cell:hESC | rs13118183          |
| <b>FAM218A</b> | 0           |                                                                                                                                                                                                                                                                                                                     | 0               | Yes                          | Mesendoderm, hESC                                                                                                                                                    | rs13118183          |
| <b>TRIM60</b>  | 0           |                                                                                                                                                                                                                                                                                                                     | 0               | Yes                          | Promoter_anchored_loops                                                                                                                                              | rs13118183          |
| <b>UPF2</b>    | 0           |                                                                                                                                                                                                                                                                                                                     | 0               | Yes                          | Mesenchymal_Stem_Cell                                                                                                                                                | rs281851            |
| <b>DHTKD1</b>  | 0           |                                                                                                                                                                                                                                                                                                                     | 0               | Yes                          | Mesenchymal_Stem_Cell                                                                                                                                                | rs281851            |
| <b>SEC61A2</b> | 0           |                                                                                                                                                                                                                                                                                                                     | 0               | Yes                          | Mesenchymal_Stem_Cell                                                                                                                                                | rs281851            |
| <b>NUDT5</b>   | 0           |                                                                                                                                                                                                                                                                                                                     | 0               | Yes                          | Left_Ventricle, Liver, GM12878,<br>IMR90, Mesenchymal_Stem_Cell,<br>Mesendoderm, Trophoblast-<br>like_Cell, hESC                                                     | rs281851            |
| <b>CDC123</b>  | 0           |                                                                                                                                                                                                                                                                                                                     | 0               | Yes                          | Left_Ventricle, Liver, GM12878,<br>IMR90, Mesenchymal_Stem_Cell,<br>Mesendoderm, Trophoblast-<br>like_Cell, hESC                                                     | rs281851            |
| <b>CAMK1D</b>  | 0           |                                                                                                                                                                                                                                                                                                                     | 0               | Yes                          | IMR90, Mesenchymal_Stem_Cell,<br>Mesendoderm, Trophoblast-<br>like_Cell, hESC                                                                                        | rs281851            |
| <b>CCDC3</b>   | 65          | PsychENCODE_eQTLs,<br>CMC_SVA_cis,<br>GTEx/v8/Adipose_Subcutan<br>eous,<br>GTEx/v8/Adipose_Visceral_<br>Omentum,<br>GTEx/v8/Artery_Aorta,<br>GTEx/v8/Artery_Tibial,<br>GTEx/v8/Colon_Sigmoid,<br>GTEx/v8/Heart_Left_Ventric<br>le, GTEx/v8/Lung,<br>GTEx/v8/Nerve_Tibial,<br>GTEx/v8/Cells_Cultured_fib<br>roblasts | 77              | Yes                          | IMR90, Mesenchymal_Stem_Cell,<br>Mesendoderm, hESC                                                                                                                   | rs281851            |
| <b>OPTN</b>    | 0           | 2                                                                                                                                                                                                                                                                                                                   | 0               | Yes                          | IMR90, Mesenchymal_Stem_Cell,<br>Mesendoderm, hESC                                                                                                                   | rs281851            |
| <b>PHYH</b>    | 1           | eQTLGen_cis_eQTLs                                                                                                                                                                                                                                                                                                   | 0               | No                           |                                                                                                                                                                      | rs281851            |

**Supplementary Table 3. Variation in Number of Variants Mapped to Gene Sets – Rare Variant Set Analysis**

| <b>Gene</b>          | <b>Sex</b> | <b># Variants in WGS</b> | <b># Variants in Imputed</b> |
|----------------------|------------|--------------------------|------------------------------|
| <b><i>SCUBE2</i></b> | Combined   | 25                       | 3                            |
| <b><i>TMEM26</i></b> | Male       | 2                        | 0                            |
| <b><i>CPSF4L</i></b> | Male       | 5                        | 1                            |

Supplementary Table 4. Common Variant Analysis WGS Additional Significant Loci – Main Genetic Effect

| rsID        | Sex      | Chr:Pos<br>(b38) | Eff/Alt | EAF  | Gene Locus<br>(FUMA<br>SNP2GENE)                                                                                                                                                                                                              | N     | MAIN GENETIC<br>EFFECT |                 | INTERACTION<br>EFFECT |          | JOINT<br>EFFECT |
|-------------|----------|------------------|---------|------|-----------------------------------------------------------------------------------------------------------------------------------------------------------------------------------------------------------------------------------------------|-------|------------------------|-----------------|-----------------------|----------|-----------------|
|             |          |                  |         |      |                                                                                                                                                                                                                                               |       | Beta (SE)              | P-Value         | Beta<br>(SE)          | P-Value  | P-Value         |
| rs35370454* | Combined | 7:11242<br>5915  | C/T     | 0.99 | <i>IMMP2L</i> ,<br><i>LRRN3</i> ,<br><i>DOCK4</i> ,<br><i>ZNF277</i> ,<br><b><i>IFRD1</i></b> ,<br><i>LSMEM1</i> ,<br><i>TMEM168</i> ,<br><i>C7orf60</i> ,<br><i>GPR85</i> ,<br><i>LINC00998</i> ,<br><i>TSRM</i>                             | 11615 | 0.024<br>(0.004)       | <b>1.32E-08</b> | -0.028<br>(0.012)     | 2.35E-02 | 9.18E-08        |
| rs13433190* | Female   | 20:3751<br>618   | G/T     | 0.93 | <i>TMEM239</i> ,<br><i>DDRKG1</i> ,<br><i>GFRA4</i> ,<br><i>ADAM33</i> ,<br><i>SIGLEC1</i> ,<br><b><i>HSPA12B</i></b> ,<br><i>C20orf27</i> ,<br><i>SPEF1</i> ,<br><i>CENPB</i> ,<br><i>CDC25B</i> ,<br><i>MAVS</i> , <i>RP11-<br/>352D3.2</i> | 6546  | 0.018<br>(0.003)       | <b>6.07E-09</b> | -0.012<br>(0.009)     | 1.75E-01 | 3.48E-08        |

\* rs35370454 and rs13433190 were not present in imputed genotype data.

Supplementary Table 5. Rare Variant WGS Set-Based Analysis Additional Significant Results – Main Genetic Effect

|                      |                            |            |                |                      | <i>MAIN GENETIC EFFECT</i> | <i>INTERACTION EFFECT</i> | <i>JOINT EFFECT</i> |
|----------------------|----------------------------|------------|----------------|----------------------|----------------------------|---------------------------|---------------------|
| <b>Gene</b>          | <b>Chr: Position (b38)</b> | <b>Sex</b> | <b>Dataset</b> | <b># of Variants</b> | <b>P-Value</b>             | <b>P-Value</b>            | <b>P-Value</b>      |
| <b><i>HBB*</i></b>   | 11:5,225,464-5,229,395     | Female     | WGS            | 1                    | <b>2.75E-06</b>            | 3.27E-02                  | 9.89E-06            |
| <b><i>KRR1*</i></b>  | 12:75,490,863-75,511,636   | Female     | WGS            | 2                    | <b>3.06E-06</b>            | 6.80E-01                  | 2.74E-04            |
| <b><i>PKD2L2</i></b> | 5:137,887,968-137,942,747  | Male       | WGS            | 9                    | 1.19E-05                   | 3.77E-03                  | <b>1.42E-06</b>     |
|                      |                            |            | Imputed        | 2                    | 7.14E-01                   | 8.24E-01                  | 9.00E-01            |
| <b><i>UBOX5</i></b>  | 20:3,107,573-3,160,196     | Male       | WGS            | 2                    | <b>9.70E-09</b>            | 1.83E-02                  | <b>2.07E-08</b>     |
|                      |                            |            | Imputed        | 1                    | 7.82E-01                   | 7.58E-01                  | 9.03E-01            |

\*Variant sets mapped to HBB and KRR1 were not present in imputed genotype data

Supplementary Table 6. Rare Variant Set-Based Meta-Analysis Additional Significant Loci – Main Genetic Effect

|                |                                |          |                       | MAIN GENETIC<br>EFFECT | INTERACTION<br>EFFECT | JOINT<br>EFFECT |
|----------------|--------------------------------|----------|-----------------------|------------------------|-----------------------|-----------------|
| Gene           | Chr:Pos (b38)                  | Sex      | Number of<br>Variants | P-Value                | P-Value               | P-Value         |
| <i>UQCC3</i>   | 11:62,670,273-<br>62,673,686   | Combined | 3                     | <b>3.51E-07</b>        | 1.39E-02              | <b>1.89E-06</b> |
| <i>C6orf52</i> | 6:10,671,418-<br>10,694,797    | Female   | 2                     | 2.00E-05               | 4.41E-04              | <b>3.28E-07</b> |
| <i>TCF4</i>    | 18:55,222,185-<br>55,664,787   | Female   | 2                     | <b>4.23E-07</b>        | 3.78E-02              | 2.89E-06        |
| <i>ZNF383</i>  | 19:37,217,926-<br>37,248,740   | Female   | 2                     | 2.29E-04               | 2.59E-04              | <b>1.06E-06</b> |
| <i>SYS1</i>    | 20:45,361,937-<br>45,376,798   | Female   | 2                     | <b>1.27E-06</b>        | 1.01E-02              | <b>1.49E-06</b> |
| <i>OSER1</i>   | 20:44,195,939-<br>44,210,771   | Female   | 2                     | <b>1.46E-06</b>        | 2.94E-01              | 6.40E-05        |
| <i>PAPOLG</i>  | 2:60,756,253-<br>60,802,086    | Male     | 3                     | <b>1.70E-06</b>        | 8.00E-01              | 1.03E-04        |
| <i>TBX20</i>   | 7:35,202,430-<br>35,254,100    | Male     | 2                     | 3.27E-05               | 2.60E-04              | <b>2.53E-07</b> |
| <i>ACAT1</i>   | 11:108,116,695-<br>108,147,603 | Male     | 1                     | <b>9.84E-07</b>        | 1.31E-04              | <b>7.47E-09</b> |
| <i>TGDS</i>    | 13:94,574,054-<br>94,596,242   | Male     | 2                     | <b>4.72E-09</b>        | 3.33E-02              | <b>3.97E-08</b> |
| <i>CHAMP1</i>  | 13:114,314,482-<br>114,337,626 | Male     | 3                     | <b>5.98E-09</b>        | 1.87E-02              | <b>2.60E-08</b> |
| <i>RPS15A</i>  | 16:18,781,295-<br>18,790,383   | Male     | 2                     | <b>7.75E-09</b>        | 2.59E-02              | <b>4.52E-08</b> |
| <i>ZNF112</i>  | 19:44,326,555-<br>44,367,217   | Male     | 6                     | <b>8.76E-07</b>        | 8.93E-01              | 6.82E-05        |
| <i>PIM3</i>    | 22:49,960,768-<br>49,964,072   | Male     | 2                     | <b>7.62E-09</b>        | 4.68E-02              | <b>8.31E-08</b> |

**Supplementary Table 7. Assessing Whether Genomic Loci for OSA Are Previously Unreported**

| Variant or Gene   | Unreported | GWAS Catalog                                                                                                                                                                                                                                                                                                                                                                                                                                                                                                   | PheWeb       | Prior OSA GWAS Studies **                  |
|-------------------|------------|----------------------------------------------------------------------------------------------------------------------------------------------------------------------------------------------------------------------------------------------------------------------------------------------------------------------------------------------------------------------------------------------------------------------------------------------------------------------------------------------------------------|--------------|--------------------------------------------|
| <i>rs13118183</i> | *          |                                                                                                                                                                                                                                                                                                                                                                                                                                                                                                                | -            | -                                          |
| <i>rs281851</i>   | *          |                                                                                                                                                                                                                                                                                                                                                                                                                                                                                                                | -            | -                                          |
| <b>SCUBE2</b>     |            | Total protein levels x insomnia interaction; Personality traits or cognitive traits (multivariate analysis); Waist-hip ratio                                                                                                                                                                                                                                                                                                                                                                                   | -            | Min SpO2 [S4];                             |
| <b>TMEM26</b>     | *          | Total PHF-tau (SNP x SNP interaction); Cognitive ability, years of educational attainment or schizophrenia (pleiotropy); Diffuse plaques (SNP x SNP interaction); Diastolic BP; Systolic BP; PR Interval ; BMI; Adult body size; Body mass index (MTAG)                                                                                                                                                                                                                                                        | Hypertension | -                                          |
| <b>CPSF4L</b>     | *          | Red cell distribution width                                                                                                                                                                                                                                                                                                                                                                                                                                                                                    | -            | -                                          |
| <b>UBLCP1</b>     |            |                                                                                                                                                                                                                                                                                                                                                                                                                                                                                                                | -            | AHI 3% [S4]; Avg Desaturation 0% [S4, S5]; |
| <b>MED31</b>      | *          | Systolic BP; Waist circumference adjusted for body mass index                                                                                                                                                                                                                                                                                                                                                                                                                                                  | -            | -                                          |
| <b>RAP1GAP</b>    | *          | Immature fraction of reticulocytes; High light scatter reticulocyte percentage of red cells; High light scatter reticulocyte count; Mean reticulocyte volume; Abdominal aortic calcification levels;                                                                                                                                                                                                                                                                                                           | -            | -                                          |
| <b>CPNE5</b>      |            | Heart rate variability traits (SDNN); Heart rate variability traits (RMSSD); Heart rate variability (standard deviation of normal-to-normal intervals); Heart rate variability (corrected standard deviation of normal-to-normal intervals); Heart rate variability (corrected root mean square of successive differences); Heart rate variability (root mean square of successive differences); Resting heart rate; Heart rate variability traits (pVRSA/HF); Pulse Pressure; Heart rate response to exercise | -            | Min SpO2 [S4];                             |

|               |   |                                                                                                                     |                          |                                                             |
|---------------|---|---------------------------------------------------------------------------------------------------------------------|--------------------------|-------------------------------------------------------------|
| <b>MYMX</b>   |   | Mean spheric corpuscular volume; Diastolic BP; Mean reticulocyte volume                                             | -                        | Avg SpO2 [S4]; Per90 [S4, S5]                               |
| <b>YY1</b>    | * | Caudate nucleus volume; Dementia; Pulse Pressure;                                                                   | Atherosclerosis of aorta | -                                                           |
| <b>ZNF773</b> |   |                                                                                                                     | -                        | Min SpO2 [S4];                                              |
| <b>YBEY</b>   |   |                                                                                                                     | -                        | Avg Desaturation 0% [S4]                                    |
| <b>IQCB1</b>  |   | Multiple sclerosis; Mean corpuscular volume; Hemoglobin levels                                                      | -                        | Avg SpO2 [S4, S5];<br>Min SpO2 [S4, S5];<br>Per90 [S4, S5]; |
| <b>PI4K2B</b> | * |                                                                                                                     | -                        | -                                                           |
| <b>CORO1A</b> |   | Cortical thickness; Brain morphology (MOSTest); Multiple sclerosis; BMI; Whole body fat mass (UKB data field 23100) | -                        | AHI 3% [S4];                                                |

\*\*Four prior large-scale OSA-related GWAS studies were assessed: Sofer et al 2023 [PMID: 36989840; Table 1, Supplementary Tables S2-S3,S6, S7-S8 (FDR-BH<=0.05), S9-S17], Cade et al 2021 [PMID: 34446064; Tables 3-5, Supplementary Tables S4-S5 [P<0.01]], Strausz et al 2021 [PMID: 33243845; Table 2, Figures S5,S7], and Xu et al 2022 [PMID: 35819321; Table 1, Table 2, Supplementary Tables E3-E5]. Amongst these studies overlapped genes was identified

**Supplementary Table 8. Stratified Analysis According to Exposure Status – Common Variants – WGS Data**

| rsID              | Exposure Status | Sex      | Chr:Position (b38) | Effect Allele / Alternative Allele | Effect Allele Frequency | Gene           | N    | Beta (SE)         | P               | Direction of Effect |
|-------------------|-----------------|----------|--------------------|------------------------------------|-------------------------|----------------|------|-------------------|-----------------|---------------------|
| <b>rs13118183</b> | EDS             | Combined | 4:164200775        | A/G                                | 0.937                   | <i>MARCHF1</i> | 2163 | 0.025<br>(0.006)  | 3.30E-05        | +                   |
| <b>rs13118183</b> | EDS             | Female   | 4:164200775        | A/G                                | 0.933                   | <i>MARCHF1</i> | 1137 | 0.020<br>(0.010)  | 4.60E-02        | +                   |
| <b>rs13118183</b> | EDS             | Male     | 4:164200775        | A/G                                | 0.942                   | <i>MARCHF1</i> | 1026 | 0.026<br>(0.008)  | 6.00E-04        | +                   |
| <b>rs13118183</b> | No EDS          | Combined | 4:164200775        | A/G                                | 0.939                   | <i>MARCHF1</i> | 9451 | -0.009<br>(0.002) | 5.40E-05        | -                   |
| <b>rs13118183</b> | No EDS          | Female   | 4:164200775        | A/G                                | 0.939                   | <i>MARCHF1</i> | 5413 | -0.012<br>(0.004) | 1.40E-03        | -                   |
| <b>rs13118183</b> | No EDS          | Male     | 4:164200775        | A/G                                | 0.939                   | <i>MARCHF1</i> | 4038 | -0.009<br>(0.003) | 4.30E-03        | -                   |
| <b>rs281851</b>   | EDS             | Combined | 10:12924495        | A/C                                | 0.605                   | <i>CCDC3</i>   | 2163 | 0.018<br>(0.003)  | <b>4.46E-09</b> | +                   |
| <b>rs281851</b>   | EDS             | Female   | 10:12924495        | A/C                                | 0.608                   | <i>CCDC3</i>   | 1137 | 0.019<br>(0.005)  | 1.94E-04        | +                   |
| <b>rs281851</b>   | EDS             | Male     | 10:12924495        | A/C                                | 0.602                   | <i>CCDC3</i>   | 1026 | 0.016<br>(0.004)  | 6.00E-06        | +                   |
| <b>rs281851</b>   | No EDS          | Combined | 10:12924495        | A/C                                | 0.588                   | <i>CCDC3</i>   | 9452 | -0.001<br>(0.001) | 3.73E-01        | -                   |
| <b>rs281851</b>   | No EDS          | Female   | 10:12924495        | A/C                                | 0.59                    | <i>CCDC3</i>   | 5414 | -0.001<br>(0.002) | 6.54E-01        | -                   |
| <b>rs281851</b>   | No EDS          | Male     | 10:12924495        | A/C                                | 0.59                    | <i>CCDC3</i>   | 4038 | -0.001<br>(0.001) | 3.60E-01        | -                   |

**Supplementary Table 9. Stratified Meta-Analysis According to Exposure Status – Rare Variants**

| <i>Gene</i>    | Exposure Status | Sex      | Number of Variants | P-Value  |
|----------------|-----------------|----------|--------------------|----------|
| <i>UBLCP1</i>  | EDS             | Combined | 2                  | 3.39E-02 |
| <i>UBLCP1</i>  | No EDS          | Combined | 15                 | 6.53E-01 |
| <i>SCUBE2</i>  | EDS             | Combined | 50                 | 9.60E-01 |
| <i>SCUBE2</i>  | No EDS          | Combined | 99                 | 5.90E-01 |
| <i>MED31</i>   | EDS             | Combined | 1                  | 5.56E-01 |
| <i>MED31</i>   | No EDS          | Combined | 6                  | 8.09E-01 |
| <i>RAP1GAP</i> | EDS             | Female   | 2                  | 8.62E-01 |
| <i>RAP1GAP</i> | No EDS          | Female   | 2                  | 6.43E-01 |
| <i>CPNES</i>   | EDS             | Female   | 11                 | 3.11E-02 |
| <i>CPNES</i>   | No EDS          | Female   | 33                 | 7.58E-01 |
| <i>MYMX</i>    | EDS             | Female   | 2                  | 2.02E-02 |
| <i>MYMX</i>    | No EDS          | Female   | 2                  | 3.26E-02 |
| <i>YY1</i>     | EDS             | Female   | *                  | *        |
| <i>YY1</i>     | No EDS          | Female   | 2                  | 9.63E-01 |
| <i>ZNF773</i>  | EDS             | Female   | 8                  | 2.26E-01 |
| <i>ZNF773</i>  | No EDS          | Female   | 30                 | 3.17E-01 |
| <i>YBEY</i>    | EDS             | Female   | 3                  | 6.99E-01 |
| <i>YBEY</i>    | No EDS          | Female   | 8                  | 7.35E-01 |
| <i>IQCB1</i>   | EDS             | Male     | 10                 | 7.59E-01 |
| <i>IQCB1</i>   | No EDS          | Male     | 32                 | 4.72E-01 |
| <i>PI4K2B</i>  | EDS             | Male     | 9                  | 4.05E-01 |
| <i>PI4K2B</i>  | No EDS          | Male     | 15                 | 5.36E-01 |
| <i>TMEM26</i>  | EDS             | Male     | 5                  | 1.06E-02 |
| <i>TMEM26</i>  | No EDS          | Male     | 14                 | 2.44E-01 |
| <i>CORO1A</i>  | EDS             | Male     | 4                  | 4.70E-01 |
| <i>CORO1A</i>  | No EDS          | Male     | 13                 | 1.98E-01 |
| <i>CPSF4L</i>  | EDS             | Male     | 9                  | 4.96E-01 |
| <i>CPSF4L</i>  | No EDS          | Male     | 14                 | 2.45E-01 |

\* Denotes this variant set was not available in this subset of samples.

**Supplementary Table 10. MAGMA Tissue-Enrichment Analysis Significant Results**

| <b>Sex</b>    | <b>Tissue</b>         | <b>Beta</b> | <b>Standard Error</b> | <b>P-Value</b>  |
|---------------|-----------------------|-------------|-----------------------|-----------------|
| <b>Female</b> | Breast Mammary Tissue | 0.069494    | 0.01739               | <b>3.24E-05</b> |
| <b>Female</b> | Tibial Nerve          | 0.049348    | 0.013949              | <b>2.03E-04</b> |

\*Bonferroni Threshold:  $p < 9.3e-04$

**Supplementary Table 11. MAGMA Gene-Level Analysis Significant Results\***

| <i>Gene</i>          | <i>Position</i>          | <i>Sex</i> | <i>Number of Variants</i> | <i>N</i> | <i>Z-Statistic</i> | <i>P-Value</i>  |
|----------------------|--------------------------|------------|---------------------------|----------|--------------------|-----------------|
| <b><i>NOP53</i></b>  | 19:47,745,546-47,757,058 | Combined   | 3                         | 11615    | 4.7344             | <b>1.10E-06</b> |
| <b><i>EYA2</i></b>   | 20:46,894,624-47,188,844 | Combined   | 18                        | 11614    | 4.6463             | <b>1.69E-06</b> |
| <b><i>ZNF563</i></b> | 19:12,317,477-12,333,720 | Combined   | 4                         | 11614    | 4.5472             | <b>2.72E-06</b> |
| <b><i>WDR19</i></b>  | 4:39,182,504-39,285,810  | Female     | 9                         | 6551     | 4.6988             | <b>1.31E-06</b> |

\*Bonferroni Threshold:  $p < 4.3e-06$

**Supplementary Table 12. Open Targets Platform Identified Mouse Phenotypes**

| <b>mouseGene</b> | <b>phenotype</b>                                                       | <b>category</b>                                                 |
|------------------|------------------------------------------------------------------------|-----------------------------------------------------------------|
| <i>Marchf1</i>   | decreased interleukin-12 secretion                                     | immune system phenotype                                         |
| <i>Marchf1</i>   | abnormal B cell physiology                                             | hematopoietic system phenotype,immune system phenotype          |
| <i>Marchf1</i>   | decreased tumor necrosis factor secretion                              | immune system phenotype                                         |
| <i>Marchf1</i>   | decreased regulatory T cell number                                     | hematopoietic system phenotype,immune system phenotype          |
| <i>Marchf1</i>   | abnormal T cell differentiation                                        | hematopoietic system phenotype,immune system phenotype          |
| <i>Marchf1</i>   | abnormal dendritic cell antigen presentation                           | immune system phenotype                                         |
| <i>Marchf1</i>   | abnormal dendritic cell morphology                                     | hematopoietic system phenotype,immune system phenotype          |
| <i>Marchf1</i>   | abnormal level of surface class II molecules                           | immune system phenotype                                         |
| <i>Ccdc3</i>     | increased circulating glucose level                                    | homeostasis/metabolism phenotype                                |
| <i>Ccdc3</i>     | abnormal fat pad morphology                                            | adipose tissue phenotype                                        |
| <i>Ccdc3</i>     | weight loss                                                            | growth/size/body region phenotype                               |
| <i>Ccdc3</i>     | decreased liver weight                                                 | liver/biliary system phenotype                                  |
| <i>Ccdc3</i>     | increased insulin sensitivity                                          | homeostasis/metabolism phenotype                                |
| <i>Ccdc3</i>     | decreased susceptibility to age-related hepatic steatosis              | liver/biliary system phenotype                                  |
| <i>Ccdc3</i>     | abnormal glucose homeostasis                                           | homeostasis/metabolism phenotype                                |
| <i>Ccdc3</i>     | decreased white fat cell size                                          | adipose tissue phenotype                                        |
| <i>Ccdc3</i>     | decreased liver triglyceride level                                     | homeostasis/metabolism phenotype,liver/biliary system phenotype |
| <i>Ccdc3</i>     | decreased circulating leptin level                                     | homeostasis/metabolism phenotype                                |
| <i>Ccdc3</i>     | decreased subcutaneous adipose tissue amount                           | integument phenotype,adipose tissue phenotype                   |
| <i>Ublcp1</i>    | tremors                                                                | behavior/neurological phenotype                                 |
| <i>Med31</i>     | decreased fibroblast proliferation                                     | cellular phenotype                                              |
| <i>Med31</i>     | abnormal cartilage development                                         | skeleton phenotype                                              |
| <i>Med31</i>     | pallor                                                                 | integument phenotype                                            |
| <i>Med31</i>     | edema                                                                  | homeostasis/metabolism phenotype                                |
| <i>Med31</i>     | embryonic growth retardation                                           | embryo phenotype,growth/size/body region phenotype              |
| <i>Med31</i>     | lethality throughout fetal growth and development, complete penetrance | mortality/aging                                                 |
| <i>Med31</i>     | decreased embryo size                                                  | embryo phenotype,growth/size/body region phenotype              |
| <i>Med31</i>     | abnormal embryonic growth/weight/body size                             | growth/size/body region phenotype                               |
| <i>Med31</i>     | open neural tube                                                       | embryo phenotype,nervous system phenotype                       |
| <i>Med31</i>     | decreased fetal size                                                   | growth/size/body region phenotype                               |
| <i>Med31</i>     | small thoracic cage                                                    | skeleton phenotype                                              |
| <i>Med31</i>     | spina bifida                                                           | embryo phenotype,nervous system phenotype                       |

|                |                                                               |                                                                                           |
|----------------|---------------------------------------------------------------|-------------------------------------------------------------------------------------------|
| <i>Med31</i>   | abnormal skeleton morphology                                  | skeleton phenotype                                                                        |
| <i>Med31</i>   | decreased cell proliferation                                  | cellular phenotype                                                                        |
| <i>Med31</i>   | abnormal limb development                                     | limbs/digits/tail phenotype                                                               |
| <i>Med31</i>   | small cranium                                                 | craniofacial phenotype,skeleton phenotype                                                 |
| <i>Med31</i>   | decreased bone ossification                                   | skeleton phenotype                                                                        |
| <i>Scube2</i>  | decreased bone trabecula number                               | skeleton phenotype                                                                        |
| <i>Scube2</i>  | abnormal skeleton development                                 | skeleton phenotype                                                                        |
| <i>Scube2</i>  | abnormal bone ossification                                    | skeleton phenotype                                                                        |
| <i>Scube2</i>  | decreased trabecular bone volume                              | skeleton phenotype                                                                        |
| <i>Scube2</i>  | abnormal trabecular bone morphology                           | skeleton phenotype                                                                        |
| <i>Scube2</i>  | decreased volumetric bone mineral density                     | skeleton phenotype                                                                        |
| <i>Scube2</i>  | short femur                                                   | limbs/digits/tail phenotype,skeleton phenotype                                            |
| <i>Scube2</i>  | abnormal long bone epiphyseal plate proliferative zone        | skeleton phenotype                                                                        |
| <i>Scube2</i>  | abnormal endochondral bone ossification                       | skeleton phenotype                                                                        |
| <i>Scube2</i>  | decreased osteoblast cell number                              | skeleton phenotype                                                                        |
| <i>Scube2</i>  | decreased compact bone thickness                              | skeleton phenotype                                                                        |
| <i>Scube2</i>  | decreased chondrocyte proliferation                           | cellular phenotype,skeleton phenotype                                                     |
| <i>Scube2</i>  | decreased body size                                           | growth/size/body region phenotype                                                         |
| <i>Scube2</i>  | decreased body weight                                         | growth/size/body region phenotype                                                         |
| <i>Scube2</i>  | abnormal chondrocyte differentiation                          | skeleton phenotype                                                                        |
| <i>Scube2</i>  | decreased trabecular bone thickness                           | skeleton phenotype                                                                        |
| <i>Scube2</i>  | abnormal long bone hypertrophic chondrocyte zone              | skeleton phenotype                                                                        |
| <i>Scube2</i>  | decreased body height                                         | growth/size/body region phenotype                                                         |
| <i>Scube2</i>  | short tibia                                                   | limbs/digits/tail phenotype,skeleton phenotype                                            |
| <i>Scube2</i>  | decreased body length                                         | growth/size/body region phenotype                                                         |
| <i>Eya2</i>    | increased or absent threshold for auditory brainstem response | hearing/vestibular/ear phenotype                                                          |
| <i>Eya2</i>    | enlarged spleen                                               | hematopoietic system phenotype,immune system phenotype,growth/size/body region phenotype  |
| <i>Eya2</i>    | enlarged lymph nodes                                          | immune system phenotype                                                                   |
| <i>Eya2</i>    | abnormal spleen morphology                                    | hematopoietic system phenotype,immune system phenotype                                    |
| <i>Eya2</i>    | abnormal lymph node morphology                                | immune system phenotype                                                                   |
| <i>Eya2</i>    | small thymus                                                  | hematopoietic system phenotype,immune system phenotype,endocrine/exocrine gland phenotype |
| <i>Eya2</i>    | impaired hearing                                              | hearing/vestibular/ear phenotype                                                          |
| <i>Eya2</i>    | abnormal pinna reflex                                         | behavior/neurological phenotype                                                           |
| <i>Eya2</i>    | small spleen                                                  | hematopoietic system phenotype,immune system phenotype                                    |
| <i>Rap1gap</i> | increased red blood cell distribution width                   | hematopoietic system phenotype                                                            |

|                |                                                                          |                                                                                         |
|----------------|--------------------------------------------------------------------------|-----------------------------------------------------------------------------------------|
| <i>Rap1gap</i> | increased circulating amylase level                                      | homeostasis/metabolism phenotype                                                        |
| <i>Rap1gap</i> | decreased lymphocyte cell number                                         | hematopoietic system phenotype,immune system phenotype                                  |
| <i>Rap1gap</i> | increased neutrophil cell number                                         | hematopoietic system phenotype,immune system phenotype                                  |
| <i>Rap1gap</i> | increased eosinophil cell number                                         | hematopoietic system phenotype,immune system phenotype                                  |
| <i>Cpne5</i>   | abnormal spleen morphology                                               | hematopoietic system phenotype,immune system phenotype                                  |
| <i>Cpne5</i>   | decreased anxiety-related response                                       | behavior/neurological phenotype                                                         |
| <i>Mymx</i>    | primary atelectasis                                                      | respiratory system phenotype                                                            |
| <i>Mymx</i>    | abnormal muscle morphology                                               | muscle phenotype                                                                        |
| <i>Mymx</i>    | abnormal limb morphology                                                 | limbs/digits/tail phenotype                                                             |
| <i>Mymx</i>    | abnormal myoblast fusion                                                 | muscle phenotype,cellular phenotype                                                     |
| <i>Mymx</i>    | muscle weakness                                                          | muscle phenotype                                                                        |
| <i>Mymx</i>    | cyanosis                                                                 | homeostasis/metabolism phenotype                                                        |
| <i>Mymx</i>    | abnormal limb muscle morphology                                          | muscle phenotype,limbs/digits/tail phenotype                                            |
| <i>Mymx</i>    | abnormal spine curvature                                                 | skeleton phenotype                                                                      |
| <i>Mymx</i>    | abnormal intercostal muscle morphology                                   | muscle phenotype                                                                        |
| <i>Mymx</i>    | nuchal edema                                                             | homeostasis/metabolism phenotype,integument phenotype,growth/size/body region phenotype |
| <i>Mymx</i>    | abnormal skeletal muscle morphology                                      | muscle phenotype                                                                        |
| <i>Mymx</i>    | decreased fetal weight                                                   | growth/size/body region phenotype                                                       |
| <i>Mymx</i>    | neonatal lethality, complete penetrance                                  | mortality/aging                                                                         |
| <i>Yy1</i>     | no abnormal phenotype detected                                           | normal phenotype                                                                        |
| <i>Yy1</i>     | cyanosis                                                                 | homeostasis/metabolism phenotype                                                        |
| <i>Yy1</i>     | decreased cell proliferation                                             | cellular phenotype                                                                      |
| <i>Yy1</i>     | prenatal lethality, incomplete penetrance                                | mortality/aging                                                                         |
| <i>Yy1</i>     | respiratory failure                                                      | respiratory system phenotype                                                            |
| <i>Yy1</i>     | exencephaly                                                              | nervous system phenotype                                                                |
| <i>Yy1</i>     | decreased birth body size                                                | growth/size/body region phenotype                                                       |
| <i>Yy1</i>     | decreased embryo size                                                    | embryo phenotype,growth/size/body region phenotype                                      |
| <i>Yy1</i>     | lethality throughout fetal growth and development, incomplete penetrance | mortality/aging                                                                         |
| <i>Yy1</i>     | absent egg cylinders                                                     | embryo phenotype                                                                        |
| <i>Yy1</i>     | pallor                                                                   | integument phenotype                                                                    |
| <i>Yy1</i>     | neonatal lethality, complete penetrance                                  | mortality/aging                                                                         |
| <i>Yy1</i>     | embryonic lethality, complete penetrance                                 | mortality/aging                                                                         |
| <i>lqcb1</i>   | decreased total body fat amount                                          | adipose tissue phenotype                                                                |
| <i>lqcb1</i>   | decreased thigmotaxis                                                    | behavior/neurological phenotype                                                         |
| <i>lqcb1</i>   | increased lean body mass                                                 | growth/size/body region phenotype                                                       |

|               |                                                          |                                                                                           |
|---------------|----------------------------------------------------------|-------------------------------------------------------------------------------------------|
| <i>Iqcb1</i>  | increased cornea thickness                               | vision/eye phenotype                                                                      |
| <i>Iqcb1</i>  | no abnormal phenotype detected                           | normal phenotype                                                                          |
| <i>Iqcb1</i>  | thick ventricular wall                                   | cardiovascular system phenotype                                                           |
| <i>Iqcb1</i>  | preweaning lethality, incomplete penetrance              | mortality/aging                                                                           |
| <i>Iqcb1</i>  | increased heart left ventricle size                      | cardiovascular system phenotype                                                           |
| <i>Coro1a</i> | enlarged lymph nodes                                     | immune system phenotype                                                                   |
| <i>Coro1a</i> | decreased spleen weight                                  | hematopoietic system phenotype,immune system phenotype                                    |
| <i>Coro1a</i> | increased spleen weight                                  | hematopoietic system phenotype,immune system phenotype,growth/size/body region phenotype  |
| <i>Coro1a</i> | no abnormal phenotype detected                           | normal phenotype                                                                          |
| <i>Coro1a</i> | abnormal T cell activation                               | hematopoietic system phenotype,immune system phenotype                                    |
| <i>Coro1a</i> | abnormal T cell physiology                               | hematopoietic system phenotype,immune system phenotype                                    |
| <i>Coro1a</i> | decreased susceptibility to bacterial infection          | immune system phenotype                                                                   |
| <i>Coro1a</i> | decreased susceptibility to systemic lupus erythematosus | immune system phenotype                                                                   |
| <i>Coro1a</i> | abnormal thymocyte activation                            | hematopoietic system phenotype,immune system phenotype,endocrine/exocrine gland phenotype |
| <i>Coro1a</i> | decreased memory T cell number                           | hematopoietic system phenotype,immune system phenotype                                    |
| <i>Coro1a</i> | increased mast cell degranulation                        | hematopoietic system phenotype,immune system phenotype,cellular phenotype                 |
| <i>Coro1a</i> | decreased thymocyte number                               | hematopoietic system phenotype,immune system phenotype,endocrine/exocrine gland phenotype |
| <i>Coro1a</i> | glomerulonephritis                                       | immune system phenotype,renal/urinary system phenotype                                    |
| <i>Coro1a</i> | decreased T cell number                                  | hematopoietic system phenotype,immune system phenotype                                    |
| <i>Coro1a</i> | increased thymocyte number                               | hematopoietic system phenotype,immune system phenotype,endocrine/exocrine gland phenotype |
| <i>Coro1a</i> | small lymph nodes                                        | immune system phenotype                                                                   |
| <i>Coro1a</i> | decreased autoantibody level                             | immune system phenotype                                                                   |
| <i>Coro1a</i> | abnormal effector T cell morphology                      | hematopoietic system phenotype,immune system phenotype                                    |
| <i>Coro1a</i> | decreased interleukin-6 secretion                        | immune system phenotype                                                                   |
| <i>Coro1a</i> | increased T cell apoptosis                               | hematopoietic system phenotype,immune system phenotype,cellular phenotype                 |
| <i>Coro1a</i> | impaired macrophage phagocytosis                         | hematopoietic system phenotype,immune system phenotype,cellular phenotype                 |
| <i>Coro1a</i> | abnormal leukocyte migration                             | hematopoietic system phenotype,immune system phenotype,cellular phenotype                 |
| <i>Coro1a</i> | hyperactivity                                            | behavior/neurological phenotype                                                           |
| <i>Coro1a</i> | decreased tumor necrosis factor secretion                | immune system phenotype                                                                   |
| <i>Coro1a</i> | increased susceptibility to systemic lupus erythematosus | immune system phenotype                                                                   |

|               |                                                               |                                                                                          |
|---------------|---------------------------------------------------------------|------------------------------------------------------------------------------------------|
| <i>Coro1a</i> | decreased monocyte cell number                                | hematopoietic system phenotype,immune system phenotype                                   |
| <i>Coro1a</i> | decreased B cell number                                       | hematopoietic system phenotype,immune system phenotype                                   |
| <i>Coro1a</i> | decreased T cell proliferation                                | hematopoietic system phenotype,immune system phenotype,cellular phenotype                |
| <i>Coro1a</i> | enlarged spleen                                               | hematopoietic system phenotype,immune system phenotype,growth/size/body region phenotype |
| <i>Coro1a</i> | decreased CD8-positive, alpha-beta T cell number              | hematopoietic system phenotype,immune system phenotype                                   |
| <i>Coro1a</i> | decreased interleukin-2 secretion                             | immune system phenotype                                                                  |
| <i>Coro1a</i> | decreased CD4-positive, alpha-beta T cell number              | hematopoietic system phenotype,immune system phenotype                                   |
| <i>Cpsf4l</i> | increased circulating alanine transaminase level              | homeostasis/metabolism phenotype                                                         |
| <i>Wdr19</i>  | absent frontal bone                                           | craniofacial phenotype,skeleton phenotype                                                |
| <i>Wdr19</i>  | abnormal spine curvature                                      | skeleton phenotype                                                                       |
| <i>Wdr19</i>  | split sternum                                                 | skeleton phenotype                                                                       |
| <i>Wdr19</i>  | abnormal premaxilla morphology                                | craniofacial phenotype,skeleton phenotype                                                |
| <i>Wdr19</i>  | abnormal limb paddle morphology                               | limbs/digits/tail phenotype                                                              |
| <i>Wdr19</i>  | abnormal maxilla morphology                                   | craniofacial phenotype,skeleton phenotype                                                |
| <i>Wdr19</i>  | abnormal cilium morphology                                    | cellular phenotype                                                                       |
| <i>Wdr19</i>  | abnormal craniofacial development                             | craniofacial phenotype                                                                   |
| <i>Wdr19</i>  | short face                                                    | craniofacial phenotype,growth/size/body region phenotype                                 |
| <i>Wdr19</i>  | abnormal tympanic ring morphology                             | hearing/vestibular/ear phenotype                                                         |
| <i>Wdr19</i>  | interparietal bone hypoplasia                                 | craniofacial phenotype,skeleton phenotype                                                |
| <i>Wdr19</i>  | defect palate                                                 | craniofacial phenotype,digestive/alimentary phenotype,growth/size/body region phenotype  |
| <i>Wdr19</i>  | embryonic lethality during organogenesis, complete penetrance | mortality/aging                                                                          |
| <i>Wdr19</i>  | short ribs                                                    | skeleton phenotype                                                                       |
| <i>Wdr19</i>  | absent supraoccipital bone                                    | craniofacial phenotype,skeleton phenotype                                                |
| <i>Wdr19</i>  | abnormal vertebrae morphology                                 | skeleton phenotype                                                                       |
| <i>Wdr19</i>  | abnormal mandibular angle morphology                          | craniofacial phenotype,skeleton phenotype                                                |
| <i>Wdr19</i>  | polyphalangy                                                  | limbs/digits/tail phenotype,skeleton phenotype                                           |
| <i>Wdr19</i>  | short maxilla                                                 | craniofacial phenotype,skeleton phenotype                                                |
| <i>Wdr19</i>  | abnormal sternum ossification                                 | skeleton phenotype                                                                       |
| <i>Wdr19</i>  | polydactyly                                                   | limbs/digits/tail phenotype                                                              |
| <i>Wdr19</i>  | absent tibia                                                  | limbs/digits/tail phenotype,skeleton phenotype                                           |
| <i>Wdr19</i>  | abnormal limb mesenchyme morphology                           | embryo phenotype,limbs/digits/tail phenotype                                             |
| <i>Wdr19</i>  | abnormal limb development                                     | limbs/digits/tail phenotype                                                              |
| <i>Wdr19</i>  | anophthalmia                                                  | vision/eye phenotype                                                                     |
| <i>Wdr19</i>  | defect secondary palate                                       | craniofacial phenotype,digestive/alimentary phenotype,growth/size/body region phenotype  |

|              |                                                                           |                                                                                                                  |
|--------------|---------------------------------------------------------------------------|------------------------------------------------------------------------------------------------------------------|
| <i>Wdr19</i> | abnormal somite development                                               | embryo phenotype                                                                                                 |
| <i>Wdr19</i> | abnormal rib morphology                                                   | skeleton phenotype                                                                                               |
| <i>Wdr19</i> | lethality throughout fetal growth and development,<br>complete penetrance | mortality/aging                                                                                                  |
| <i>Wdr19</i> | rib bifurcation                                                           | skeleton phenotype                                                                                               |
| <i>Wdr19</i> | ectopic digits                                                            | limbs/digits/tail phenotype                                                                                      |
| <i>Wdr19</i> | abnormal dermomyotome development                                         | muscle phenotype                                                                                                 |
| <i>Wdr19</i> | parietal bone hypoplasia                                                  | craniofacial phenotype,skeleton phenotype                                                                        |
| <i>Wdr19</i> | abnormal palatal shelf fusion at midline                                  | craniofacial phenotype,digestive/alimentary<br>phenotype,growth/size/body region phenotype                       |
| <i>Wdr19</i> | decreased palatine bone horizontal plate size                             | craniofacial phenotype,digestive/alimentary<br>phenotype,growth/size/body region phenotype,skeleton<br>phenotype |
| <i>Wdr19</i> | short mandible                                                            | craniofacial phenotype,skeleton phenotype                                                                        |
| <i>Wdr19</i> | abnormal myotome development                                              | muscle phenotype                                                                                                 |
| <i>Wdr19</i> | abnormal cranium morphology                                               | craniofacial phenotype,skeleton phenotype                                                                        |
| <i>Wdr19</i> | exencephaly                                                               | nervous system phenotype                                                                                         |
| <i>Wdr19</i> | rib fusion                                                                | skeleton phenotype                                                                                               |
| <i>Wdr19</i> | abnormal palatine bone morphology                                         | craniofacial phenotype,skeleton phenotype                                                                        |
| <i>Wdr19</i> | bilateral cleft upper lip                                                 | craniofacial phenotype,growth/size/body region<br>phenotype                                                      |
| <i>Wdr19</i> | short premaxilla                                                          | craniofacial phenotype,skeleton phenotype                                                                        |

**Supplementary Table 13. STRINGdb Analysis Results\***

| Category         | term ID    | term description                         | background gene count | strength | false discovery rate | matching proteins in your network (labels) |
|------------------|------------|------------------------------------------|-----------------------|----------|----------------------|--------------------------------------------|
| GO Function      | GO:0001601 | Peptide YY receptor activity             | 3                     | 2.91     | 0.0304               | NPY1R,NPY5R                                |
| GO Function      | GO:0001602 | Pancreatic polypeptide receptor activity | 4                     | 2.79     | 0.0304               | NPY1R,NPY5R                                |
| GO Function      | GO:0030976 | Thiamine pyrophosphate binding           | 8                     | 2.49     | 0.0455               | DHTKD1,TKTL2                               |
| UniProt Keywords | KW-0786    | Thiamine pyrophosphate                   | 13                    | 2.28     | 0.0433               | DHTKD1,TKTL2                               |
| SMART            | SM00861    | Transketolase, pyrimidine binding domain | 7                     | 2.55     | 0.0182               | DHTKD1,TKTL2                               |

\*Enriched terms for the protein-protein interaction network identified by STRINGdb when querying whole-genome sequence common variant analysis interaction gene loci (rs281851, rs13118183) reported in Table 1

**Supplementary Table 14. DGIdb Query Results**

| <i>Gene</i>          | <i>Drug</i>               | <i>Interaction Score</i> | <i>Interaction Types</i> | <i>Sources</i>                         | <i>PMIDs</i> |
|----------------------|---------------------------|--------------------------|--------------------------|----------------------------------------|--------------|
| <b><i>CAMK1D</i></b> | LOSARTAN                  | 1.72                     |                          | PharmGKB                               | 25410890     |
| <b><i>NPY1R</i></b>  | CHEMBL1585652             | 2.58                     |                          | DTC                                    |              |
| <b><i>NPY1R</i></b>  | CHEMBL422942              | 2.58                     |                          | TTD                                    |              |
| <b><i>NPY1R</i></b>  | N6-PHENYLADENOSINE        | 1.1                      |                          | DTC                                    |              |
| <b><i>NPY1R</i></b>  | CHEMBL530291              | 1.1                      |                          | DTC                                    |              |
| <b><i>NPY1R</i></b>  | NEUROPEPTIDE-Y            | 3.86                     |                          | TTD                                    |              |
| <b><i>NPY1R</i></b>  | CHEMBL324554              | 7.73                     |                          | DTC                                    |              |
| <b><i>NPY5R</i></b>  | VELNEPERIT                | 30.91                    | antagonist               | TdgClinicalTrial ChembInt<br>eractions |              |
| <b><i>NPY5R</i></b>  | S-237648                  | 15.46                    | antagonist               | ChembInteractions                      |              |
| <b><i>NPY5R</i></b>  | PEPTIDE YY HUMAN (3-36)   | 5.15                     |                          | TdgClinicalTrial                       |              |
| <b><i>NPY5R</i></b>  | FR-79620                  | 15.46                    |                          | TTD                                    |              |
| <b><i>EYA2</i></b>   | Solypertine Tartrate      | 1.03                     |                          | DTC                                    |              |
| <b><i>EYA2</i></b>   | (R)-Edelfosine            | 1.03                     |                          | DTC                                    |              |
| <b><i>EYA2</i></b>   | Hexamethyl Pararosaniline | 1.03                     |                          | DTC                                    |              |

**Supplementary Table 15. QIAGEN Canonical Pathway Enrichment Analysis Results**

| <b>Genes</b>          | <b>Pathway</b>                                                                 | <b>P-Value</b>  |
|-----------------------|--------------------------------------------------------------------------------|-----------------|
| <i>PI4K2B, UBLCP1</i> | 3-phosphoinositide Biosynthesis                                                | <b>8.13E-03</b> |
| <i>PI4K2B, UBLCP1</i> | Superpathway of Inositol Phosphate Compounds                                   | <b>1.05E-02</b> |
| <i>RAP1GAP</i>        | Rap1 signalling                                                                | <b>1.05E-02</b> |
| <i>PI4K2B</i>         | D-myo-inositol (1,4,5)-Trisphosphate Biosynthesis                              | <b>1.70E-02</b> |
| <i>YY1</i>            | Transcriptional regulation by the AP-2 (TFAP2) family of transcription factors | <b>2.34E-02</b> |
| <i>RAP1GAP</i>        | RET signaling                                                                  | <b>2.69E-02</b> |
| <i>MED31, ZNF773</i>  | Generic Transcription Pathway                                                  | <b>3.16E-02</b> |
| <i>SCUBE2</i>         | Hedgehog ligand biogenesis                                                     | <b>4.17E-02</b> |
| <i>YY1</i>            | VDR/RXR Activation                                                             | 5.01E-02        |
| <i>YY1</i>            | Activation of anterior HOX genes in hindbrain during early embryogenesis       | 5.25E-02        |
| <i>PI4K2B</i>         | PI Metabolism                                                                  | 5.25E-02        |
| <i>MED31</i>          | Transcriptional regulation of white adipocyte differentiation                  | 5.37E-02        |
| <i>YY1</i>            | ESR-mediated signaling                                                         | 7.59E-02        |
| <i>MED31</i>          | Regulation of lipid metabolism by PPARalpha                                    | 7.59E-02        |
| <i>RAP1GAP</i>        | Endocannabinoid Developing Neuron Pathway                                      | 8.13E-02        |
| <i>RAP1GAP</i>        | Gai Signaling                                                                  | 8.91E-02        |
