# Supplementary material for: Gene-Excessive Sleepiness Interactions Suggest Treatment Targets for Obstructive Sleep Apnea Subtype
Source: bioRxiv or medRxiv preprint supplement (doi:10.1101/2024.10.25.24316158), 2024-10-28

Supplementary Figure 1. QIAGEN Ingenuity Pathway Analysis Results

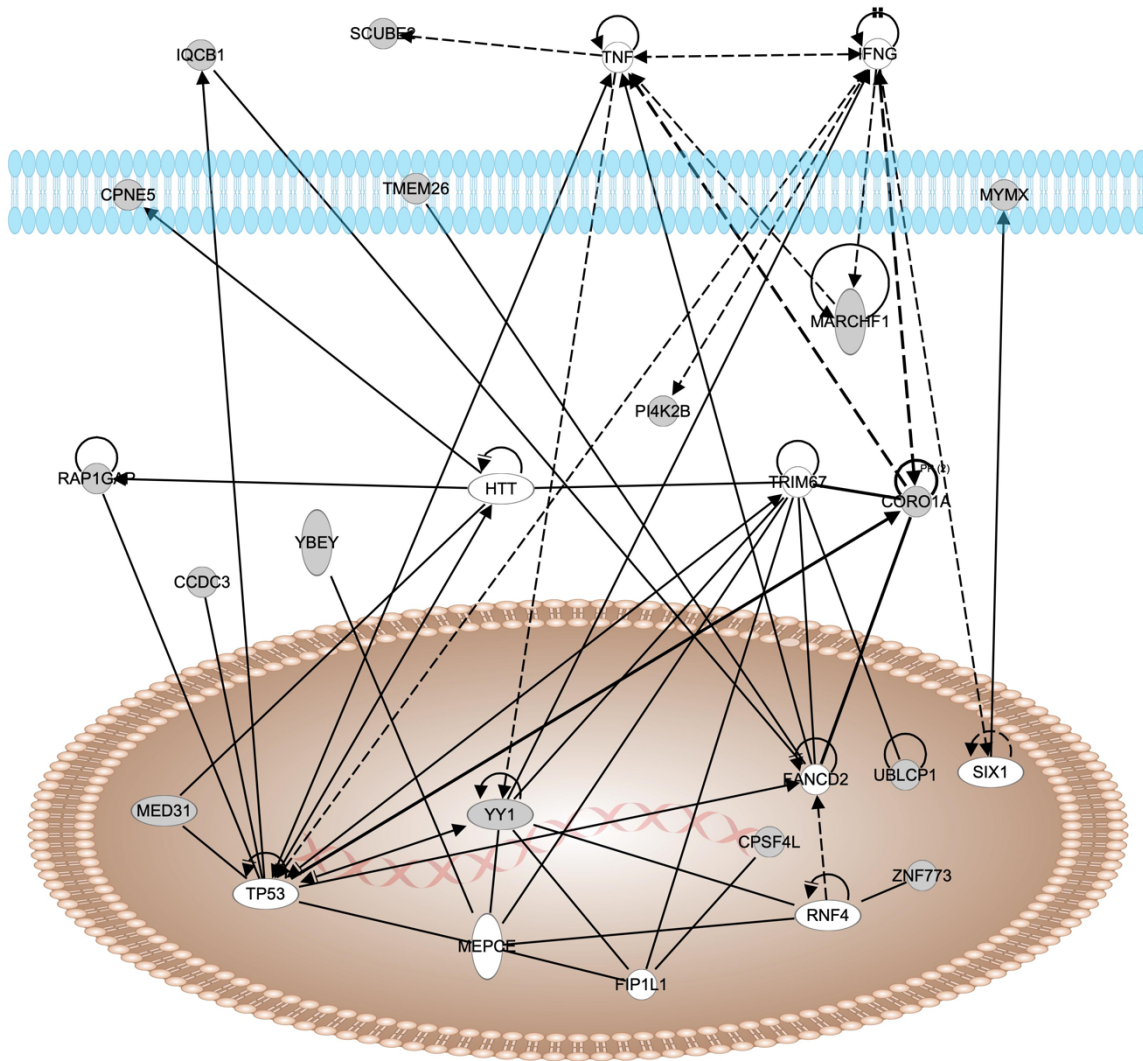

Supplement: Supplementary file [file media-2.pdf]
